# Supplementary material for: Hemolymph Proteomics and Gut Microbiota of Horseshoe Crabs Tachypleus tridentatus and Carcinoscorpius rotundicauda
Source: Frontiers journal article supplement (doi:10.3389/fmars.2020.579706), 2020-12-02
Supplement: Table_2.xlsx [file Table_2.xlsx]

## Sheet: S2. Tt hemolymph proteins
										Juvenile					Adult
SeqName	Gene	Description	Length	kDa	GO IDs	GO Names	Enzyme Codes	Enzyme Names	Sequences	Exp. q-value	Coverage [%]	# Peptides (# Unique Peptides)	# Peptide spectrum matches (PSMs)	Relative Abundance	Exp. q-value	Coverage [%]	# Peptides (# Unique Peptides)	# Peptide spectrum matches (PSMs)	Relative Abundance
Tt_000064-T1		Down syndrome cell adhesion molecule Dscam2	245	27.3	C:GO:0016020	C:membrane			MTPVIFGNRISNLGGSLLLRKVTVEDSGKYVCLVNNSSGHEKAEVELIIRENLHINVTPAIHTVNVGGTAIFQCKISGKPVTFIKWQKNHQQLPHANNRVRFLSRDVLEIRHVQREDKGYYQCFVYNDQDCGQGTAELRLGDITPTLKEVFRSVTVEPGSMVSLTCTASANPLPEVRWTLDEHPIPTHLRFSVGDFVTSRAEVISFVNVTHIRVEDGGYYKCQASNGVGSVFNREKINVIGPPFV	0.037	4	1 (1)	2	1.43818e+06
Tt_000284-T1		DJ-1zDJ-1-like isoform X1	229	24.2					MTLLSFAVGRVANARNLSLCGKFTFNSVKLLYSVKYLNTNIMSKSALLILADGAEEMEAVISADVMRRGGITVKVAGLAGKQPVVCSRDITIVPDTSLEDAIKEGPYDVVVLPGGLKGAEAIAKNSVVKSVLQEQENSGRLIAAICAAPIALKSHGIGVKKNLTSHPSKQSEMENGGIYTYSDERVVVDGQLITSRGPGTAFEFALAVVEKLMGKDKANSLIPPMLLKI	0.002	7	1 (1)	2	62410.8
Tt_000815-T1	HNRNPUL1	heterogeneous nuclear ribonucleo U 1 isoform X5	908	102.5					MSDIDPSKLKVVELRAELQARGLDTKGNKAVLVKRLKSALNHEEKDDSIDAGDEISTDGDTSLDNLTAENAGEELNESETKGQVEEVTQQTSTETTLETEKETTPQNVEQQSELTNNQSSLQPDLENTNNELTLQLDNELTKSELVLQSNSEQEKCKSSLQVDTERHEEKEEQESEQLDNQNTPQLESEQPVIEEKQESEQLDNQNTPQLESEQIVIKVEQDDMEIKEETIEDNEKGDAGCKDIKQEPMEEGEQKHGEKRKRSGSPEASHSSPTTIKREDQEDNFDDSLVALDTYNSDLTLVFDKSRYSAIPFTEEGFAFMWSGVRATYGITFGKICFEVKVKKHLEVSHLPSDEVTPHVVRVGFSGNLQSLQLGEEPKSYGYGGTAKASTNCNFVNYG…	0	3	2 (2)	4	670501
Tt_000824-T1	Srp14	Signal recognition particle	113	12.8	C:GO:0005786; P:GO:0006614; F:GO:0008312; F:GO:0030942	C:signal recognition particle, endoplasmic reticulum targeting; P:SRP-dependent cotranslational protein targeting to membrane; F:7S RNA binding; F:endoplasmic reticulum signal peptide binding			MVLLENETFLTELTRMFQKARHSGSVYITMKRYDGRTKPHPRPSKTLANPPPQTSEYKCLVRAHLGNKKIATVINAKDVNRFQVAYASLLKGNMDGLKKKDKKKTSIKSKATQ	0	24	2 (2)	3	195784
Tt_001108-T1	HMCES	Embryonic stem cell-specific 5-hydroxymethylcytosine-binding	313	36					MCGRTACTLQKKSILKACRYQGFSGKVTPQWKDVNVDHTYTPSYNLAPSQSLPVLATISTLDNETENSERSVCPMVWGLVPFWHKGNPMDTTYKTFNCRADGIREKPSYRVAFSKGQRCVVLSDGFFEWKKVNGQKEPYFIYFPQPKKLSMSERKWTSEEEEFWDVDGEWKGPRLLTIAGIYDIWKSPKDGHLLYSFTIITVDASNEMKWLHDRMPVVLNGEEAINMWLDSENVSPEEALTLLKPTENLEWHRVSTVVNSSKNNTLECVLPLRESKATPKNTITKWLSTSKRKTVKNEDKEQSPSKKIKSELD	0.033	8	1 (1)	1
Tt_001140-T1	Rop	ROP-like isoform X1	616	70.5	P:GO:0006904	P:vesicle docking involved in exocytosis			MALKKLVGMKILSDVIKAVRKKGEWKVLVVDQLGMRMISASCKMHEVAAEGITIVEDLFKKREPLPNMEAIYLITPVEKSVHALMGDFQTPSRHMYRCAHIFFTEACPDELFNELCKSTCAKIIKTLKEINIAFLPYESQVFSLDTPQCFQFYYNPAKVSLRTASLERIAEQVATLCATLGEYPSVRYRSDFDRNVELSQLIQQKLDAYKADEPTMGEGPEKMRSQLLVLDRSLDCVSPLLHELTFQAMAYDLLPIENDVYKFESSSGRDVREKEVLLDENDEIWLELRHQHIAVVSQNVTKELKKFIESKRMTSSSDKTSIKDLSTMIKKMPQYQKELSKYATHLHLAEDCMKCYQGYIDKLCKVEQDLAMGTDAEGERIKDPMRNIVPILLDANVTT…	0.022	1	1 (1)	2	423919
Tt_001189-T1		band 7 AGAP004871-like isoform X2	316	35					MDSYPLPSTLEQCPPTPTRGFSSASVQLDSASFYFPHSEDYQIPKQQWFSAQTGESPGICAYLLTAISILLIICTFPFSLIFCIKVVQEYERAVIFRLGRLLQGGAKGPGIFFIVPCIDTYCKIDLRTVSFDVPPQEILSKDSVTVAVDAVVYYRISNATIAVTNVEDYGRSTRLLAATTLRNVLGTKNLSEILSERESISHVMQSSLDEGTDPWGVKVERVEIKDVRLPVQLQRAMAAEAEASREARAKLIAAEGEQKASRALREASEVISDSPAALQLRYLQTLNSIAAEKNSTIVFPIPLELFKEFSKKMEVQ	0.002	7	2 (2)	3	603755
Tt_001426-T1		thymosin beta-like	128	14.5	F:GO:0003785; P:GO:0007015	F:actin monomer binding; P:actin filament organization			MSSPKKEDLPKVSPAIKVELTNFDSTKMRHTETREAVSLPSKNDVEQEKAHNTLLQNVEGFQRSSLHHTQPQEKIHLPSAEEIEQEKGQQQLLEGIKGFDTTKMKHAETEVKNPLPTKDVIDQEKASN	0	11	1 (1)	2	328099
Tt_001582-T1		uncharacterized protein LOC106461936, partial	924	100.9	P:GO:0023041; C:GO:0030867	P:neuronal signal transduction; C:rough endoplasmic reticulum membrane			MYATGVEHNITEDSDKPEWLKELIMKKGTSGRASSSLVKLVDRNRADSSRELLQQSTHESECEGTKITTQVIHLPKTETSSVNTPGSLNTCSNVLATSRVLTCHRTGGGTVPGTEENVPAKVVGVFDVPVSASSSGLISSGRSPLSSSMQHNLVVGHGHTLTSSFRTPLVARSASDKMGEDYTTVSSEHGDINGYGSTSEYSKINSPTSSSTFSDLSHNQPSSSDESEQELEYGPGIVDKLKSRFINISLREKLGGSNGALRRYSSMENLLDKDTRMFQATGLSTVERPFDARNRTNSNLPVFFSNMKKVKSMETLLFESEKTRKHNVFSVTSQPVLRKTSKKAIKRPRSNHPRSMLINEDVVIIENNVNTECSNNNLPSWGKVFKRRDVNCQTSTSSI…	0.009	1	1 (1)	2
Tt_002193-T1	HSPE1	10 kDa heat shock mitochondrial-like	131	14.4	F:GO:0005524; P:GO:0006457	F:ATP binding; P:protein folding			MLINCKVLDGTGISLSLYVFGYINLYTQKGQAGIGRRLIPLMDRILVQRFEPELKTKGGIMIPEKAQGKVQSAKVIAVGPGAHNEKGETTPVSVKPGDNILLPEYGGTKVEIEEKEFYLFRDGDILGKWES	0.002	11	2 (1)	3	623826
Tt_002268-T1		Testicular acid phosphatase	487	55.5	F:GO:0003993; C:GO:0016020; C:GO:0016021; P:GO:0016311	F:acid phosphatase activity; C:membrane; C:integral component of membrane; P:dephosphorylation			FPGYMLVVSQTVDLAVFPYSMLAVLQAVDRVLFPGYMLVVSQAVDLVLFPGYMLVVSQAVDLALFPGYMLVVPQSVDLALFPGYMLVVSQAVDHVLFPVKAGDQSSLQLLQILYRHGDRTPIRMFDTDPNKNYTWPEGLGRLTNLGKQQQYELGQYLRKYYKGFLTDNPREISIRSSAKERCLESAECNLAALYKPQGYWKWNNNLNWQPMPIETVPLAEDGMLFPESECPESDKEVLRILKSPMAQRFNNDHQKLYRSLSEHSGEKIETWRDVGSVYDTLKIEKLHNLTVPDWVDPMWEQLVNISNWNFHLGFDSEVILRLRTGLLLKDMISNIQKKINGRLPKLTVFMYSSHDTQVSLLLHALGVFNMLAPPYCATIILELHRNGQHNHTIKVLYLN…	0.002	2	1 (1)	1
Tt_002282-T1		rho GTPase-activating 12-like isoform X1	532	60.7	P:GO:0007165	P:signal transduction			MMDLSSLEKIIKQIGKEGSENENETPYGTPPEESPENLSCSEEEWFNSTDSSLPYLSEGNEIPQVSYVTEIQELKNDGKGLTTTSLERLVEIGGSTQPRKLPLSKSLSLPYQLDELRSCQAGDVKTSCESFHDQILNPKRQGKLLMTKLEDGRKRLKKQWSSHHVVLTDVMLLCYKDVQSTALGLWGSKADSFINLAGAVISWCPDKSSKKNVFRLTTLLGQTLLFQDDSDQTSTDWYRDIHSAISMLPSPENIKSEEKSLNNDGVNENLKSDLRKKNRFLSCRSPKFDHLKNAHGAFFNSFGDRNRIHNKLLQFFHKRPSIENLKRKGILKDEPVFGYSLQSLCEREKTNIPKFVLKCIAQIELFDLNTDGLYRVSGNLAQVQKLRLHVDQDDYSLLE…	0.002	2	1 (1)	1
Tt_002572-T1		rna-binding 45	517	57.7	F:GO:0003676; F:GO:0003723	F:nucleic acid binding; F:RNA binding			MANYSGYWRGYNGGYGDNTSNFRSSDKDKRDRHDGAPPHSRLFILCDKETTEEEIREAFEKFGKIEDIWILKDRQTNKPKGVIYVRFSKTSEAASAMETMDGERLRKYHMPMKVRIAHNREDGSRKDPNEEERVLRLFVMVPKTYTEDDLKKDFEQYGELDRVNIVRDHSTGESKGFGYVKFLKMSSAANAFENCPKTFKAKFADPKPSGHSQRDKNLPLGGGAWGFDGSKGALPPPPQTGPIMGQFPGMLNSGYDNIPCIPPKSDDMLRVNVAVPQTASFEQLYHLFDLIPGLERCDVNVGLASLKFNSCEAATWAKQKICRIEYPPGFLLQIVDIPPSGGGMKADTALASAPSGQLTNHIATLMEKISEAANVLKNVGFHVNNTTGVGQSNGNNMQE…	0.002	4	2 (1)	2	534444
Tt_002691-T1	EF1a-F2	elongation factor 1-alpha-like	461	50.6	F:GO:0003746; F:GO:0003924; F:GO:0005525; P:GO:0006414	F:translation elongation factor activity; F:GTPase activity; F:GTP binding; P:translational elongation	EC:3.6.1.15	Nucleoside-triphosphate phosphatase	MGKEKLHINIVVIGHVDSGKSTTTGHLIYKCGGIDKRTIEKFEKEAAELGKGSFKYAWVLDKLKAERERGITIDITLWKFETPKYYITVIDAPGHRDFIKNMITGTSQADCAVLIVAAGTGEFEAGISKNGQTREHALLAYTLGVKQMIVGVNKMDTTEPPYSEKRFEEIRKEVSAYIKKIGYNPAGVAFVPISGWNGDNMLEPSPHTTWFKGFKIERKGQSQEGKTLLSALDCIEPPSRPTDKPLRLPLQDVYKIGGIGTVPVGRVETGVMKPGMVVTFAPVMLTTEVKSVEMHHEALTEALPGDNVGFNVKNVSVKELRRGYVAGDSKNDPPNATADFTAQVIILNHPGQITNGYAPVLDCHTAHIACKFKEIKEKCDRRTGKKIEDNPKFIKSGDA…	0	31	16 (1)	51	506632
Tt_002748-T1	Imp	insulin-like growth factor 2 mRNA-binding 1 isoform X1	219	24.6					MNKLYIGNLPTEANEVSIRDLFHEKLGVIPKTVLVKKGGYAFVECSDEQATEKAIELLNGFNFMGSELLVEPSVPQGRRCICWMLTSNVPHLTVAQGRPSNVINKFITLIPYTRMLKNITVIAETVVDYEGTVTKLFNTPLCPSPSYLCKLQTTVRSGSESRDISLERKGSWRIFVVQPQELLKILTPLPYKVDCSSGRTLYFRADEPVFNITPPPLNL	0	7	1 (1)	1
Tt_002753-T1	Imp	insulin-like growth factor 2 mRNA-binding 1 isoform X2	615	68.2					MKSNLSSLMIHIPIIFNNLLLKQKFLICCRHIDILTSNLNVASDLKIFKILTKLPQKQHSQFTFYLPTNKDFEVIPPLNTLHLIDHETRTNKVQVSNIPNHVQWDNIKRLLATFGDVHQCDQGPAKSEHSFSILVTYDSPDQAQQAFSQLNGFELEGSILKVDFVMDQGRGNRGNRGNRGTFRPFPYSGNSPNPMRPTDFPLRILVLSDMVGAIIGRAGGTIRQVTQQSRARVDVHRKENAGSLEKVITIYGNPENCSLACQKILEVMQQEAENTNRSENPLKILAHNNLIGRIIGKNGNTIKGIMEKTDTKITVSSSIHDVNSFNMERTITVVGKLENICKAEQMISAKLRQSYENDLSAMAPQAFMFPGVHPMAMMSTMGAPGYPPAPRGGPATPPY…	0	13	5 (5)	9	1.60768e+06
Tt_002840-T1		sepiapterin reductase	262	29	F:GO:0004757; P:GO:0006729; P:GO:0055114	F:sepiapterin reductase activity; P:tetrahydrobiopterin biosynthetic process; P:oxidation-reduction process			MNATKVNWEIPSLCVITGASRGLGRVLSLSLIKKLPRNSIIALIARSEDGLKGTKQLIKECGKETQVITAPMDLNTVSAIEVEQLLAKLCQCVESSPVKIDQAFLIHNAGTIGDISRHASSFKDSDEITKYFNLNFNSAVVLTSVFLEKILKYKTKFRHIINISSLASQKAVNGWALYCSGKAARDMYFKVLAQEDPSLNVICYGPGPLETDMMKDILEHAFPEVRAFIQSKLCLYHKTNLSLWFFNEAFGSALSVVLVQSL	0.007	3	1 (1)	2	364592
Tt_002932-T1		GTP-binding SAR1b-like isoform X1	192	21.8	F:GO:0005525; C:GO:0005783; C:GO:0005794; P:GO:0006886; P:GO:0016192	F:GTP binding; C:endoplasmic reticulum; C:Golgi apparatus; P:intracellular protein transport; P:vesicle-mediated transport			MFLLDWMTNILSFLGLWKKSGKLLFLGLDNAGKTTLLHMLKDDRMAQHVPTLHPTSEELSIGNMRFTTFDLGGHHQARRVWRDYFPAVDAIVFLVDAVDRERFPESKVELDSLLTDEQLANCPVLILGNKIDKHGAASEDELRAYFGLFEQTTGKGKVARSELPGRPLELFMCSVLKRQGYGEGFRWLAQYI	0	7	1 (1)	2	288301
Tt_003002-T1	RPA3	replication A 14 kDa subunit-like	118	13.4	F:GO:0003677; C:GO:0005634; P:GO:0006260; P:GO:0006281; P:GO:0006310	F:DNA binding; C:nucleus; P:DNA replication; P:DNA repair; P:DNA recombination			MNILETARPRVNASYLPQFLGKPVCILGTVVQIDNSGKSFKMKSSDNQVITIIMEEPLGEPLQGIIEVEGIVHNPKAVICKRYFMFPQEAAEEFDINLHNEAVKLVNQYQNFYQCVKD	0.006	8	1 (1)	1
Tt_003041-T1		sphingomyelin phosphodiesterase-like	650	73.3	P:GO:0008152; F:GO:0016787	P:metabolic process; F:hydrolase activity			MDRLKNFAMTNYIKRNHWAIISLCLLLLCTIAPGAHISVPLSVYADLSLSSGVEEGSKVPPSNDLSSTVNPHLKKIPSATDEIQKWHAKKKVNVLLDLWTRISSPFDMKEIISGLKTGKHSPVTCFACKFGVSLVQHIAEKKKSGDDIVALVKVLCNFFKIESARVCQGVTQVFQGEVLYVFERLVLSPQEVCGLILGDTCSPVYNPYHNWTVPLTPFPKPPVKPVPPPKTGAPTTRVLHLSDTHFDPYYREGSNAECGEPLCCRIADGPAPDPSKAAGKWGDYRSCDTPLQTLEHMLKHIRDNHKVDYVLWTGDIPPHDVWNSSQSEQISLLKSVTQLMNKYLKNIPIFSAIGNHESSPVNSFPMPQITGKYDISWLYDEIAKTWAPWVPRGAEATIK…	0.002	2	1 (1)	1
Tt_003372-T2	Arp1	clone 403-like	404	45.2	F:GO:0005524; C:GO:0005737; C:GO:0005856	F:ATP binding; C:cytoplasm; C:cytoskeleton			MLLSTDSYVFDRRIKFCFYLFLPLLKNKMCDDDVAALVVDNGSGMCKAGFAGDDAPRAVFPSIVGRPRHQGVMVGMGQKDSYVGDEAQSKRGILTLKYPIEHGIVTNWDDMEKIWHHTFYNELRVAPEEHPVLLTEAPLNPKANREKMTQIMFETFNTPAMYVAIQAVLSLYASGRTTGIVLDSGDGVSHTVPIYEGYALPHAILRLDLAGRDLTDYLMKILTERGYSFTTTAEREIVRDIKEKLCYVALDFEQEMGTAANSSSLEKSYELPDGQVITIGNERFRCPEAMFQPSFLGMESCGIHETTFNSIMKCDVDIRKDLYANTVLSGGSTMFPGIADRMQKEITALAPSTMKIKIIAPPERKYSVWIGGSILASLSTFQQMWISKQEYDESGPSIV…	0	61	26 (2)	295	1.63406e+09
Tt_003386-T1		polypeptide N-acetylgalactosaminyltransferase 9 isoform X1	612	70.4					MNILPRRRSVVIKILVLVLVTWFLFTILLTSNDKTNTDKAIEIRNIPNKHVVLENKKLPEVKKLAFKNYKPKVHHKYDNKSVVTDVSGSQGHGVLTPPTDPDGPGEMGKPVKLNNLTQSQQAMVQQGWDKNAFNQYVSDLLSLHRSLPDVRDKECRGIKHLDTLPQTSVIVCFHNEAWSVLLRTVHSILDRSPHHLIKEVILVDDFSDQPHLLRQLDDYVTQLPKVRVVRTRRREGLIRARLLGASVATATVLTYLDSHCECTEGWLEPLLDRIARNSTTVVCPVIDVINDDTFEYHFRDSSSLNVGGFDWNLQFNWHGIPDREKKRRKHQWDPLWSPTMAGGLFAIDRTFFETLGTYDSGFDIWGGENLELSFKIWMCHGTLEIVPCSHVGHIFRKRS…	0.04	1	1 (1)	2	80558320
Tt_003731-T1		---NA---	107	11.9					MIWISKLVVICCIFMVSADVQGSSHSSCLQMHSECQVDGRSNSRSCCPELRCRSYYPGSPSGSCVEKSWIPHVLVSAGGRHKHSILLYVISTSFASLYIYTNFKCLM	0.002	13	1 (1)	1
Tt_003938-T2		kinase C-binding 1-like	850	97					MEKGNKGKQMATRFKENPDFAAKTKAFLTMASAGNVQLPRHESTSPNLQSVKEEAEIEEGSVTSQKQTVRKTNTPGKTTKSELKKDTFCWICHRDKVVANCHICPRGYHIQCVPQREISDNWVCPECQTIRISEDADSCSPALKLLTIPEFCGLLKHVMQRIKNVAMQPFLHPVSRQEFPDYYQYIVQPMDLSVLDKKVKDKSYKSTESFLADAKWLVHNSIIFNGFYHPLTVNAKSVVKQVKKEIREIEICPDCYSHSYSSKDDWFVEPCRISHTLIYAKLKGYPFWPAKAVRVLNDFIDARFFGDHDRAWIPVQKCYLLSKNPPLPIKKKHSGYEHSMEELKLHLSRLQKKSVPFRYAPFNTVVDPRKVVSLLKPSDKDETINKKKTQLVKPEEKNE…	0.008	1	1 (1)	2	400910
Tt_004313-T1	RpLP0	60S acidic ribosomal P0-like	314	34.6	C:GO:0005840; P:GO:0042254	C:ribosome; P:ribosome biogenesis			MGREDRATWKSNYFLKLVQLLDEYPKCFIVGVDNVGSRQMQQIRHSLRQSAVVLMGKNTMIRKAIRGHLENNSALEKILPHIKGNVGFVFTKEDLIEVRDKILDNKVKAPAKAGALAPCDVKIPPQNTGLGPEKTSFFQALQIPTKISKGTIEILNEIHLIKKDDKVGASEATLLNMLNISPFTFGLIINQVYDSGTVFSPAILDITTEDLRTKFLEGVRNVAAVSLQIGYPTIASIPHSIVRGLKNLIAIAVETDITFKEAEMAKEYIKDPSKFASTATAEVVAPTTEATPKAAEKEESEESEDDDMGFGLFD	0	17	5 (5)	17	3.35418e+06
Tt_004543-T2	Cont	contactin-like	1221	137					MGREMFWFCIVTSSLSVASCIECPRGWEPVLESCYKFTRAPLKDLKGAKEKCFAYNAHLVSVNTIEEHSYIVNYLSLNDPQHRRWFTSGQDEGNNVWVWDGDQTQFTNVDALWLPDQEKEVGKYLAYNYSKKTNSWGLAKVSSTEELAYICEVHQEDVNEIVIMDRNIDYGIIVNDKRKLPKGPSFLQEPEDGVFDLSGRNQVNYISLRCVAGGYPPPTYTWYKEEYERDNLVNRNIDPLSDYRYTQTDGILIISNPNQTKDRGKYHCSATNKFGTVISQTVHLSFGFIGEFNKKRSPDYGREYWGKSITCDPPQHYPEVNYYWTRNTFPNFVEEDQRVFVSRDGNLYFSNLEKIDRANYSCNVQSVISSTGRTGPFFSLRVEPASSGQKLLFPNTFPK…	0.002	1	1 (1)	1	653299
Tt_004700-T1		uncharacterized protein LOC106475198	189	21.2					MKIMLTNYYYCLLSVVVLILYCLLVCRKITTILKCVSIFLDNKCVEKTKLLKTQKLAYSAVFDYLCSQNQKKLSEFFEGLDDQCSIQENESVACLQGLKPATNITSFSYICEKNGTMENCLQQTLSKCTDKSRGALIGSVRVYENTICEEHTKTVTDEPSTASQSPSTGTSVMVTIGVLLLNRFKCSTR	0.018	4	1 (1)	1	2.07633e+06
Tt_005540-T1	Lis-1	lissencephaly-1 homolog	509	57					MKLFIKLGLVNSLPVPPPSVLSKCIFYDTTYTLVKPLTMTMVIILGCVVMINWHDECCCGVKPVGTGYSLNIVMHSSLNSLLILWQKGVGVSIGAPSCLQVEGLRNCLQVGLNKAIADYLASSGYMEALECLKKEADMPGEIDKKYVGLLEKKWTSVIRLQKKVMDLETKLAEAEKEYIAGAPTREKRSPSEWIPRPPERYTLTGHRAPVTRVIFHPIFSLIVSSSEDATIKVWDYETGDYEKTLKGHTDSVQDIAFDHTGKWLVSCSADMSIKLWDFQVYECVKTMHGHDHNVSSVTFMPSGDHLLSCSRDKTIKMWEVATGYCVKTFTGHREWVRMVRTNQDGSLIASCSNDQTLRVWVVSTKECKLELREHDHVVECIAWAPESATSAINEAAGAD…	0.008	3	1 (1)	1
Tt_005550-T1	EPRS	bifunctional glutamate proline--tRNA ligase-like	1551	176.5	F:GO:0000166; F:GO:0004827; C:GO:0005737; P:GO:0006433; C:GO:0017101	F:nucleotide binding; F:proline-tRNA ligase activity; C:cytoplasm; P:prolyl-tRNA aminoacylation; C:aminoacyl-tRNA synthetase multienzyme complex	EC:6.1.1.15	Proline--tRNA ligase	MFTAVLGCFIVLATRKLISVLLLIAMEVEVNCSLSVPPLSVLITGEFVKPDIVLNVVWGKATTLEIPHNGVTLNSAIAICRYLARLAPSKGLYGTSALEKTEVDHWLEFTSKLFSPGEFSQSIKFLNEVFQAPVSYLVGQTVTLADVAVWSALYQNNQWQKLLTEAAAPFNLLRWYNFLSSMEPFSGVEQMFSAETQIKTGKIYSKDDKIPKSNEKGTKDEGKFIDLPGAEKGKVVRFPPEASGFLHIGHAKAALLNQYYQNEFEGKLILRFDDTNPAKEKEDFEKVILEDVEMLGIKPNIFSYTSDYFDVLLQSCEDLLKSGKAYVDGTDGETMKIEREARKESKSRNNSVQRNLEMWEEMKKGSKNGQNCCVRAKIDMNADNGCMRDPTLYRYKKET…	0.002	1	1 (1)	2	84890.5
Tt_005800-T1	PDCL3	phosducin 3	238	27.5					MQDPNADTEWNDILRSKGILPPKEETSKEITEDQIIDIVEDTVKQKLNVVKCYEDMTLDEIEALEDEEDERVLLEYRNKRIAEMKEAAMKAKFGDVREISAEDYLEQVNKAGEGIWVVLHLYKSGIPLCTLINQFLMQLAQKFPATKFLRSISTTCIPNFPDKNLPTIFVYHEGELKKQFIGSDEFGGTKLKLKELEWILGETGAIKTDLESDPRPKNVREDVMLSSLRRNEDYDNDW	0	6	1 (1)	1
Tt_006203-T1		sulfotransferase 1C2-like	320	37.5					MGSVTKTPAYQDVDGFRIPKMFSPDALRSTFKYQPRDDDVFIVTYPKCGTTWVQHIVMSIFKKGEAIDNFQEFQRSTPFLEMIGSEAVEIMPKPGAIKTHLPFHLTPYSPRAKYIYVTRNPKDCCVSFYHHTKMFSGYEFEDGSFDDFFELFIDGLVDFGDYFDHLLSWYEHRNDPNVLFMTYEDIKADTESAVMKLAGFLDREYVTMMENDPSIMKNILYHTSIEYMKKNTNKHITDFLISSPDLLLADPNLPEGLRYIINHMKNLNISPPKQTTFVRKGVVGDWKNYFSPEQSKRLIKKFNEKTKETDIRKLWPDIFQ	0.027	4	1 (1)	1
Tt_006205-T1	CPT2	carnitine O-palmitoyltransferase mitochondrial-like	716	81.9	F:GO:0004095; C:GO:0005739; P:GO:0006635	F:carnitine O-palmitoyltransferase activity; C:mitochondrion; P:fatty acid beta-oxidation	EC:2.3.1.21	Carnitine O-palmitoyltransferase	MSAALLLLVIRKECYRKLSSFHRISYHRSLGNNFNVTSTAAGLQQVGSSFQPNHGIGNDAPSSLVVYCRHLSSKHANDSYQYLEKCSLPTMYFQASLPRLPIPELEKTCERYLTALKPIISQDQMKKTEEIVNRFRSGEGKVLHDELVALDKQHRYTSYISGPWFEMYLKSRLPLVINFNPFMAFKDDPKHEYNHQLVRATNMLVSSLRFFKSLKENLLKPEVFHLNPTKSDTEKFLKFIRWFPKSVACYGAYWYKAFPLDMSQFDNLLCSTRIPRHGQDEIQAEQTSKHMAVLRKGHIYVFDALDQDGNIFPPSHLYSCLAYILTDNHPVPTHPVGVLTTENRDQWATVREMLKDAGNKEQLRLIDSAIYVMVFEDETVGEDHIKAASTMLHGPFGNR…	0.006	1	1 (1)	2	275350
Tt_006362-T1	Atp5i	ATP synthase subunit mitochondrial-like	90	10.5	C:GO:0000276; F:GO:0015078; P:GO:0015986; C:GO:0016021	C:mitochondrial proton-transporting ATP synthase complex, coupling factor F(o); F:proton transmembrane transporter activity; P:ATP synthesis coupled proton transport; C:integral component of membrane			MTELAPPVRVSPFIRACRWGALTAGVLWGMTRYRSLSKKENALREYEEKQRVILEARRAEEKKRANKEELLYLAKESGVPIPPNFEEQFK	0.002	17	1 (1)	4
Tt_007210-T1		transcription elongation regulator 1-like isoform X2	647	69					MADTSEGDNSNIAFNQNGSGTGPQIGHGPVSQMGHGPDPQMGHGQDPQNQMGHGPGPQMGHGPPFFRPDGPPDHKGSGFFPRGRGGFPPRGPRPPFGPRGSPPRFRGPPPMNRGPPPHGRGGPRRPPPPGFRGPPPHHFDPNFPRHMPPPPAGMPPPPGGMPHPPGMPPPPGGGPPAMRPPGLPPMNVPPPGYQNMPGSGQWTTTGVQGIVSTTTATANGIDLTGEIWVETKAGDGKIYYYNAKTRESSWTKPENVKVLTQDQIEAMATAAGVTTTSSTTTAAQAAVAQAQSASLQKMGQTTMTATTTTQPAPEASTAMNPVSTVSTTSVGGMHPMTGMPPVNMFQPPPFGLPPPFSVPPGMPPPGIMPPGFPGFGIPPPGFPPMAVTPVSVTSPTVTS…	0.013	1	1 (1)	2	433314
Tt_007325-T1		annexin B9-like isoform X2	626	66.1					MSYPYGSGYPCQPGSQVPTYPNYPGNQGIQQPPIGFNVTNPLQQGYPSSAGGYPPHVGGTYSPSPGGGYPPQSTGGGYPLSSSAPGYLQPTLQGGYTIPSTGGSYPPHSGLGYPSSIGSSYPSPSSGANYPPSTGSSYPPPSSGAGYPSSSGVAYPPLSGQGFSPSTGSSFLPPSGASYPSSTAGTFSPPPSGEAFPAPPTQGSYLPSSVAVYPPPTGGSYLPPSGASYPSSTGGHLPQTLSYGSGYPPGQQPPANLYSSTTPYPAQPSGGHGALAQSVYPQLFVAAHPSVPSQSPYSSTGGKSSYTVMSQSQQGTVVPARPFDPQADAQTLRKAMKGLGTDEKSIINILARRVNEQRQQIAISYKTQFGKDLVKDLKSELSGRFEDVIMALMTPLSDF…	0.009	1	1 (1)	2	355765
Tt_007423-T1		---NA---	145	16.5					MLNFSAAPQAENFTTPNFILLLVITVNTVGNYAENGSNKITRNIHNGNSGYEYIGENSRALNRCRNKSSFDKKANFGICNENRRYKKNMFKRDPDVGLVFDSDPNLRDGLTRGKRTARQRIYGGIKSDIRLDSEQRINDSLHLDA	0.002	11	1 (1)	2	267358
Tt_008215-T1		cytochrome c oxidase subunit 6C	81	9.2	C:GO:0016020	C:membrane			MSTTVKKIPKPQLRGLLRSSLRVHLGIVAVLSIASGIAWKYGIAEPRKKRYADFYNSYDAEKDFERMRQAGVFQSCRPDGE	0	20	2 (2)	5	900970
Tt_008922-T1	Rack1	receptor of activated C kinase 1	317	35.8	F:GO:0016301; P:GO:0016310	F:kinase activity; P:phosphorylation			MTEGLYLKGTLRGHNGWITQIATNPKYPEMILSSSRDKTLIMWKLTRDDTNYGIPQKRLKGHGHFVTDVVMSSDGQYALSCSWDKTLRLWDLSVGNTTRRFENHTKDVLSVAFSSDNRQIVSGSRDRTIKLWNTLAQCKYTIQEDGHSDWVSCVRFSPNNSNPIIVSCGWDKYVKVWNLTNCRLKTNHIGHTGYLNTVTVSPDGSLCASGGKDCKAMLWDLNEGKHLYTLDHTDIINSLCFSPNRYWLCVATGPSIKIWDLEGKNMVDELRPEVITTSSKAEPPQCISMAWSADGQTLFAGYTDNLIRVWQVSIASR	0.003	4	2 (2)	2	328669
Tt_009005-T1		heterogeneous nuclear ribonucleo H3-like isoform X2	534	58.4	F:GO:0003723	F:RNA binding			MTQKIKHNPEGIYRKLKDDRSKRQGSKVNKMSSEDNEGYVLRVRGLPWSATKEEIMNFFSDVKIVGGEDGIHTTLSREGRPSGEAYIEVYSEEDVKKALEKHNEHMGHRYIEVFRSKESEMNWVIKRTGAHQQDALSDGCVRLRGLPFGCSKEEIAQFFTGLKIVPNGITLPTDIQGRSTGEAYVQFDSRDIAEKAMGKHKEKIGHRYIEIFKSSLQEVKTVIGMGHQRMRMMSARPSPYDRNDRLGGLGGRSGLNRGSRSFRGFMDDDSYGDFGGNYGGIPKRGGFMDDDSYGDVGNNYGGLPKRGGFMDDDTYGDFGNNYGGIPNRGGRNMEPMDVIGGLGSRFNNNGFNGRRCDYGPSGHFVHMRGLPFRAIRQDIIDFFRPLMPIGIEILYDKTG…	0	16	7 (7)	12	606521
Tt_009206-T1	ATPCL	ATP-citrate synthase-like	780	85.5	F:GO:0003878; F:GO:0005524; C:GO:0005737; P:GO:0006085; P:GO:0006101; P:GO:0006629; F:GO:0046872; F:GO:0048037	F:ATP citrate synthase activity; F:ATP binding; C:cytoplasm; P:acetyl-CoA biosynthetic process; P:citrate metabolic process; P:lipid metabolic process; F:metal ion binding; F:cofactor binding	EC:2.3.3.8	ATP citrate synthase	MLNLTGDGTLRETLLLQLNHSATFKLCQLFSLCHVFTQCNTGDGIVKALQEFQPKLVEHKVSIFVRRAGPNYQEGLRVMREVGSTLGVPIHVFGPETHMTAIVAMAMKKRDIPELQESSHTTANFLLPDGMYKSNLAPKETSVSSSDEKSQLVSPGEKSSTVESSVKPLFSTGTKAIIWGMQSRAVQSMLDFDFVCSRVEWSVVAMVYPLTGDHKQKFYWGHKEILIPMYKNMADAMKKHPEADVLVSFASLRSAYDSTIETLQYPQIRTIAIIAEGIPENLTRKMNKKAAEKGVIIIGPATVGGIKPGCFKIGNTGGMMDNILSSKLYRPGSVAYVSRSGGMSNELNNIIARSANGVYEGVAIGGDRYPGTTFMDHLLRYEREPDVKMMVLLGEVGGI…	0	3	2 (2)	5	749658
Tt_009618-T1	Imp	insulin-like growth factor 2 mRNA-binding 1 isoform X1	601	66.2					MNQLYIGNLPVEATEESLRELFYERSKVVPKNVLVKKGGYAFVECPDEQTAKKAIELLNGFTFMNSELLVEPSVPQGRRSHSNKIHVSNIPNSFEWDQIRTLLTTFGEVQHCVKGPTKSENSYHVFVTYQTSDQAQQAFTELNGYEIEGLPLKVDFVMDQGHGNLGGRTNRGLSRSFPYSGNSPNSMRPTDFPLRILVFSDMVGAIIGRAGGTIRRISQESRARVDVHRKENAGSFEKVITIYGDPENCSLACKKILEVVQQEAENSSRGDIPLKILAHNNLIGRLIGKSGNTIKGIMEKTDTKITISSGIHDVNSYNMERIVTIVGKLENTSKAEQMISSKLRQSYENDLSSMAPQTLMFPGVHPMAMMSTMGGPGCPPAFRGTQAIPPYGMYNLPCM…	0	2	1 (1)	1
Tt_009773-T1		methionine aminopeptidase 1	378	42.3	P:GO:0006508; F:GO:0046872; F:GO:0070006; P:GO:0070084	P:proteolysis; F:metal ion binding; F:metalloaminopeptidase activity; P:protein initiator methionine removal	EC:3.4.11	Acting on peptide bonds (peptidases)	MWSAIGQLPLSFFVNLTMTEEAKPQRLSAQPTKGNRTAVLAGGFNIDINNNSSVFMCAEGNDKQTTEYIPWPGFQFTGKLRPFPKTPKREVPDFIQRPDYADHKKGWPLSEQAVKGSSHIKVLDDEEIEGMKVVCKLAREVLDVAAEAAGVGVTTDEIDRLVNEASIERECYPSPLNYYGFPKSCCTSVNEVICHGIPDSRPLEDGDLLNVDVTVYHRGFHGDLNETFLIGNVDEEGRRLVQVTYESLMKAIEIVKPGVKYREIGNVIQKHVQAHGFSVVRSFCGHGIHRLFHTAPSVPHYSKNKAVGIMKAGHCFTIEPMISEGTWRDLLWPDDWTAVTQDGKRSAQFEQTLLVTDSGCEILTQRRENGGQPHFMDK	0.002	4	1 (1)	1
Tt_010365-T1		ELMO domain-containing C-like	205	23.1					MRESKRVLIIIVGYLTTSTMIHSFPQSREKEDIEDFYPGSPGFTEPVTDKVTFSTEKPLSTTISTTKQGTSEGTNTEMSTTKGTSTTTPTTKGTSTTTPTTKGTSTTMSTTRETSTTMSTTTTKLFQLECRLRKKGNVHCKILNSEDSSEKAGEEAHKSKKERKKCKGKKKKHCKKNRDSKENHSKEKKKKKKDYRFNLFFPFDF	0	8	1 (1)	5	2.04885e+06
Tt_010496-T1	HMCN1	hemicentin-1-like, partial	94	10.5	F:GO:0005509	F:calcium ion binding			VPPTILNTTDPNQSVLVNRPLFLDCPVQADPPAQIQWLKNEQPIDPIRDPFIHFINGGQKLQLLRTRVEDAGTYTCVATSTAGQAKKDFRLHIL	0	22	1 (1)	6	4.25998e+06
Tt_011983-T1		H ACA ribonucleo complex subunit 1-like	223	22.9	P:GO:0000454; C:GO:0031429; F:GO:0034513	P:snoRNA guided rRNA pseudouridine synthesis; C:box H/ACA snoRNP complex; F:box H/ACA snoRNA binding			MNRGRGGFGGRGRGRGGGFGGRGGGGGRGGRGGGRGGGRGGGRGGFDFGPPEEVKEFGYFSHPCQDDLVCKAVLDDIPYFNAPIYLENKQQIGKVDEIFGSIKDYYISVKLTEDIKASSFSKNQKVYIDPARLLPLQRFLPKPPGAPNKVQKRGGGGGRGGGGRGGRGGFGGRGGFGDRRGRGGRGDRGGGRGRGGFGDRGGRGGHGGFGGGNNTGFNQRKSF	0.002	8	1 (1)	2	124577
Tt_012109-T1	OGDHL	2-oxoglutarate mitochondrial-like	210	24.1	F:GO:0004591; C:GO:0005739; P:GO:0006099; F:GO:0030976; C:GO:0045252	F:oxoglutarate dehydrogenase (succinyl-transferring) activity; C:mitochondrion; P:tricarboxylic acid cycle; F:thiamine pyrophosphate binding; C:oxoglutarate dehydrogenase complex	EC:1.2.4.2	Oxoglutarate dehydrogenase (succinyl-transferring)	MFDALDSDSLESGESESNCLQMHDDKEATGQEDYNSPSNGDSQDDEPRRWKYLSQVQCEKQYTVSVSIGTTFKRIIPDEGEASKDPEKVKKLLLCSGKVYYDLAKEREKLNLQSDIVITRVEQLCPFPFDLLKDEIKKYPNAKITWAQEEHKNQGFWGHVQPRLESCLRNMNDPRHITYGGRAVSPSTATGSKQMFKKEQEKLLVDAFHL	0.009	4	1 (1)	2	167326
Tt_012147-T1	Myo1A	unconventional myosin-Id-like	1003	115.4	F:GO:0003774; F:GO:0003779; F:GO:0005524; C:GO:0016459	F:motor activity; F:actin binding; F:ATP binding; C:myosin complex	EC:3.6.1.15	Nucleoside-triphosphate phosphatase	MAGFSDVGIGDFVLLEDISLDSFMDNLKKRYEAGKIYTYIGEVCVSINPYRTMNIYGPEYVNDYKGREMFERTPHIFAIADAAYKSMKRSSRDSCIVISGESGSGKTEASKIIMRYIAAITNVSGQQEVERVKNILLQSNCILESFGNAKTNRNDNSSRFGKYMDINFDFKGDPLGGHISNYLLEKSRVVMQQHGERNFHSFYQLLFGSPDSVLSQYKLKQDSEAYFYTKQGGINKVDTINDKTDYKSVNSAMRTLGFLQEHCDTLWKVVAAILHMGNIEFSMEDDQTFVKNKDTLKILSKLFNVKEDDLEKTLCHRVIAAGGEVMQKGHTKAEAVYGRDAFAKAIYERMFTWIVNRINEAIKVDADWKSHGKNTVIGVLDIYGFEIFDNNSFEQFCIN…	0.002	3	1 (1)	1
Tt_012407-T1		10 kDa heat shock mitochondrial-like	101	11	F:GO:0005524; P:GO:0006457	F:ATP binding; P:protein folding			MAALGRRLIPLLDRVLVERFAAETRTKGGIMIPEKAVAKVQSGTIVAVGPGGRNEKGETIPVSVKVGDKVLLPDWGGTKVEIEEKEYYLFRDADILGKWES	0	37	4 (3)	7	709859
Tt_012674-T1	p115	general vesicular transport factor p115-like isoform X2	833	93.5					MDYLKSGLKSVLGAQADSQQPTAAETVERLVERVQTSTLLDDRRDACRALKSMSKKYRVEVGAQAMDALIYVIEMDRSDAEIVGYALDALSNVISGPQDDEDYIEGQEEQDLGTQFTEIYIKRTENVTLLLDLLEEFDFKVRWPAVKLFTGLLECRPKELQECVLVSPMGVSRLMDLLSDSREVIRNDTLLLLVNLTKGNANIQKIVAFENAFDKLLDIIAEEGYSDGGVVVEDSLAVLLNLLKNNSSNQNFFKEGSYIQRLTPYFELQGDSSGGDMGWSAQKVSNLHLMLQVIRTLVSPNNPLQVISSCQKVMNQSGLLEQLCNILMASGVPADILTETINTVAEVIRGHHANQEYFATVSAPSSPPRPAIVVLLMSMVNEKQQFVLRCAVLYCFQCF…	0.002	4	2 (2)	3	756227
Tt_012730-T1	Ank	ankyrin-2-like isoform X9	2706	301.7					MTKKVDTIHVNGATDENNDDNAEDQAPEAGNILSKTQADSSASFLRAARSGNVEKVLEYLKGNTDINTSNANGLNALHLASKEGHVNIVSELLKRGANVNASTKKGNTALHIACLAGQEAVVKILIQSGANVNVQSQNGFTPLYMAAQENHDSVVRFLLANGANQSLATEDGFTPLAVALQQSHEKVVTILLENDAKGRVRLPALHIAAKKDDCKAADVLLQNDHNPDVTSKSGFTPLHIAAHYGNESIGSLLLAKGADINYTAKHQITPLHVASKWGKANMVSLLLEKGAKIDSPTRNGLAPLHMASQGDHVDSARILLFHKAPVDDITVDFLTALHVAAHCGHVRVAKLLLDRKADPNARALNGFTPLHIACKKNRIKVVELLLKYGGSIEATTESG…	0.002	0	1 (1)	2	226137
Tt_012831-T1		cytochrome b-c1 complex subunit 7-like	107	13.1	C:GO:0005750; P:GO:0006122	C:mitochondrial respiratory chain complex III; P:mitochondrial electron transport, ubiquinol to cytochrome c			MALSRIFGNQALRRWVFNMTGYNKLGLLHDDCLYENEVVKEAIRRLPPEVQDERAFRMVRAMQLDLQHTILPKEQWTKFEEDVRYLEPYINEVKKEMKEKQEWNKNY	0.002	10	1 (1)	4	668717
Tt_012906-T1		nucleolar transcription factor 1-A-like	785	89.8	F:GO:0003677; C:GO:0005634	F:DNA binding; C:nucleus			MASAATSPQAGSSRRKGGKRPPTESTNGPITEMKTEPSNPKKLKPAEDTTSVKVKKEIAEPTTASKHSKKKETGTTNEEENTQANKENQSSRNTLVFDWTSEDLSQLINNLTNCLPKTDNVRYNTLVEKLDWDKVSFGSYTGVQCKEKWMQIMTRLRRYRTLTDMVTDAKEWVKHPWSSFSTSKKQKHPEMPKKPLTPYFRYFLEKREKYSHEHPEMSMTDLAKLLSKKFQQLPEKKKLKYKESYERENEVYKQELEKFKKEHPDAFPLSESKHHPSGHIGPEKPHTPFNLFLADRLKRSEYAGLEKKDALEKARKQWNALSDGKRIKWIRKAVQDEQRFSEDVAGYLQSHPDFKPNPLRNVLSKAEKELKDRYDGKPERPPNSGYSLFSRIMLRELKD…	0	2	1 (1)	2	282583
Tt_013492-T1		zinc finger CCCH domain-containing 10-like	265	30.2					MAESDNGNERGNVTARIDDDICRDFLRNVCRRGSNCKYKHPEPEKENQEGGNRDIKFCRDFQNRGCRRANCKFVHCTKREEEYYISTGKLPRHVQETLGEKVPVCKDFLRGFCKRGIYCKFRHLTTHEYEMEMGGGRGIPVMGDSEFDDFGYEFQPQRKRPAFDSSFATGDGQDGPGVLLPTPGSDPMANTSMPDVQMLEGENSILRRKVEELKKQVTELTSTVEYLLEQNAQLRASKQSSMPPINPSPKSYSFQSSGPNTTRPW	0.002	6	1 (1)	1
Tt_013759-T1		RNA-binding squid-like	329	36.7					MEDDNQYNGQNQQYSDYSEDQYGQYQADETETDALQDGDKSQNQMDSSKGKSEDDRKLFIGGVSWETRTNDLKDYFSRYGEVVDVNIKIDPNTGNCRGFAFVTFASQESVDAVIKDGTHTVKGKQIDPKKAKSKPGAKKIFVGGLDPNMPASDIKAYFKKFGKVETVELPVDKVKNQRRQFAFVTFETEEAVNEVIKQPKQMIGSKECDIKKATPKPDYRTMRGGFMGGWGSLRSGANGERGRGRGDYMAEGWESPGYGGYSQGYGSYNQGYGSYDYGGYSGDYGGGYSGYDYSRWGPYGQSYGQQDSVYGKTRGAVRGRTTTSYHPYR	0.03	6	1 (1)	1
Tt_014012-T1		uncharacterized protein LOC106478150	358	40.4					MMETYQSRVVAVCYLGCLITVLDSVALEVHKNILEPNQMPIQPHKTSLLLLSKALNAKIKKGDDAADIFDQGSSRISHINENLLQCCNKGKHIIPIGLDITGNQKYVDIGRCRRNCRHKFHHLRHHYLRHNRHTTHKTSTTVDCAISEKMSQKNCSFTDLCEPLSRIREIHHLLTGPREVEVVEKCSCSSNPSSCQRTSSKMILFKDTPFETAVDVGSCLGHCNEGNSCVPLRNRTVSVDGPNGATCVQVIEECQCTQPCYRMEFMEIYYEQIWNDTINATTEDVKEIDVGLCVGGCRHLEEDLFHCVLRDEKNPDKCLMSLRKEKLLCKPVRFNSHVFTTRNGAAKSVLSIEDCACQ	0.003	3	1 (1)	1	95901
Tt_014322-T2		integrin alpha-9	969	107.5	C:GO:0016020	C:membrane			MARAKILCIRHQLTAYLILLSWSGVLGFNVDTIFPIYFKGPSQGAYFGYNVALHKNRVGSLALITAPQANCSTRFREIYQPGVLYKCFVNSETCEEVELYKEGNTEFKNGEEFTYHDLKNGSWLGVSLAVQPGGENFIVTCGHLWKNQRYNNIYLTNGICYVIDRELNPSSVVKLTPFSRRSNQSIQKHKIYYHAFALGGFSAVYSEENYDFLLGAPGIYDWTGSVADFRTGKNTNDTSLVGIPMPPWNQDPSQQAYIGYSVTMGRFFEFGGELFVTGAPRDADNKGRVYMFDALSIINPVFDVKAKKEGEQMGEYFGAVVLGINLNNDRFTDLIVGAPLHSKESGGDEGKVYVYISDGVGLQNTEYKIMGSEKPNARFGSAIANAGDLNQDGYLDVAV…	0	3	2 (2)	4	939621
Tt_014421-T1		integrin beta-PS-like	639	71	C:GO:0016020	C:membrane			MKYFAVGTAIILLQLSGICKMQGNQCNSKETCGKCIASDSVCAWCMQENFESNYRCDLEVNLKGKCNKSKIVKPENAIQKIKDEELSNKGALEGEAVQIKPQRVHLKLRPNMPFRLEVKCRQAVDYPVDLYYVMDLSKSMEDDKDKLASLGGLLAEEMGKITKNFRLGFGSFVDKISLPFVSTYPSKLKKPCDGCAAPYGFRNQLPLDQDTNLFAAEVKKANVSGNLDAPEGGFDAIMQAVVCQEQIGWRNKSRKLLVFSTDSGFHYAGDGKLAGIIKPNDEKCHLDGKGYYTETTTQDYPSFSQINRKIKDHKVNIIFAVTEEQYEIYKKLSKKFEGSGVGKLDEDSANVVDLVRDQYNKITETMELKDNAPENVKITYYSSCLGPEGQLRKTSECKG…	0	3	1 (1)	2	135105
Tt_014570-T1	COX6B1	cytochrome c oxidase subunit 6B1-like	74	8.9	C:GO:0005739; F:GO:0016491; P:GO:0055114	C:mitochondrion; F:oxidoreductase activity; P:oxidation-reduction process			MPTSIMSDVETLSTAPFDARFPNQNQTRNCWQNFVDFYRCRKVKGDDYEPCNYFKKVYQSLCPNSWVRNKFVVH	0	26	2 (2)	3	2.99127e+06
Tt_015381-T1	Gpdh	glycerol-3-phosphate dehydrogenase [NAD(+)] cytoplasmic-like	356	38.9					MSEAVEQSSPKKVSIIGSGNWGSAISRIIGSNVLKNGKFDSMVKMYVFEELVDGQKLSEIINRKHENVKYLPGFPIPPNVVANPDVVDTAKDADIIIFVLPHKFVRVTCQPLVGKIKPTAIGVSLIKGFDITPGGGIDLISNVINKLLNIDVAVLMGANLAPEVAAEKFCETTIGCTNKEEGKLLKELVQTDYFRVVVVDDVHTIELCGALKNIVACGAGFVDGLGYGDNTKAAVIRLGLMEMIKFAEVFYPGSKLSTFFESCGVADLITTCYGGRNRRVAEAFVKTGKKIEQLEKEILNGQRMQGPQTAEEVYIMLKNKGMEDRFPLFTAIHQICQGQLPPTQMVNCIQNHPEHM	0.014	3	1 (1)	1	197288
Tt_015498-T2	RpL3	60S ribosomal L3-like	403	46.2	F:GO:0003735; C:GO:0005840; P:GO:0006412	F:structural constituent of ribosome; C:ribosome; P:translation			MSHRKFSAPRHGSVGFTPKKRSKRHRGKVKAFPKDDPSKPVHLTGFIGYKAGMTHIVREVDRPGSKVNKKEVVEAVTIIETPPMVVVGVVGYIETPKGLRTFKTVWAEHLSEDCKRRFYKNWYKSKKKAFTKYSRKWQDELGKKEIENDLKKMKKYCKVIRVIAHTQMKLLRKRQKKAHLMEIQLNGGTIPQKIKWAREHLEKQVPISQVFSQDEMIDVIGVTKGKGFKGVTSRWHTKKLPRKTHKGLRKVACIGAWHPSRVQFTVARAGQKGYHHRTEINKKIYRIGAGIHKKDNKVIKNNASTEYDLTEKSITPMGGFPHYGEVNCDFIMLKGCVMGPKKRVITLRKSLLTQTKRSALEKITLKFIDTSSKFGHGRFQTPAEKLAFMGPLKKQKLKE…	0	23	8 (8)	24	3.63623e+06
Tt_015518-T1	SAFB	SAFB-like transcription modulator isoform X1	972	109.8	F:GO:0003676; F:GO:0003723	F:nucleic acid binding; F:RNA binding			MATHQDQDVGSTTKKKITDLRVVDLRAELEKRGLDKTGVKAALIERLTKCLQEEGLDPESHLFEVSAEGTPGKKTPVSKRPAKRSLNDSETQSNADGLDDDDEKEDSDDEKTNTEDLDVIGEALQSSVVDKCESDNRIEGKTKEMTKEGMSVTPTLEEENCKSQEEVDSIQQTNNKWDSSKDNSEEVAVEQASALSSPKPESAPVVAPLTVEDVLSMHSPDQKPSDSSLIVNIDDMQSDLDADLEGALSETGSDRCRDDKNNSNNLSNDKQSLESESKNNKDCEDKTLSTAIKESKKEHSDLDSGDQKKIKLSQKSSVADVDGDQQEKEAMDEKETAQEGGDGSVTKTTEEQPSTTTAASKAKSTTTKNGKSVTKEETRERSRRMIAASRNLWVSGLAS…	0.002	1	1 (1)	2	372844
Tt_015676-T1		clone 403-like	376	42.2	F:GO:0005524; C:GO:0005737; C:GO:0005856	F:ATP binding; C:cytoplasm; C:cytoskeleton			MGDDDISPIVIDIGSGICKAGFAGDDTPRAVFPSVVGRPRYLPVMVGMGHKDSYVGDEAEYKRGVLTLKYPVEHGIVTNWDDMEKIWQQTFFNELRVSPEDHPVLLTEAPLNPRSNREKITQMMFEIFNTPAMYIAIQAVLSLYSSGRTTGNVLDCGDGVSHTVPIYEGYALTHAVSRLDLGGRDLTDYLVRILAERGYDFPSTAEREIVRDVKEKLCYVAYDFEEEMNLSATCNSLEKSYELPDGQVINLRNERFRCPECLFQPSYLGMEACGVHEMTYNTIMKCDVDVRKVLYSNIVLSGGSSMFSGINDRMQKEITALAPVTMKVKVTAPPERKYSVWIGGSILSSLSSFQMMWITKQEYDECGPGIVHRKCF	0.035	3	1 (1)	1	2.02728e+06
Tt_015736-T1		collagen alpha-1(I) chain-like	1483	148.5	F:GO:0005201	F:extracellular matrix structural constituent			MKIHKLTSYLWFISLLCILATAQNIVEPGLFDFDERTNCVFEDIKYRDGDQWNPDPCTICQCLLGNVICDKKECPEIECTTVKFIPLGKCCPICADGGETESEQIAPPQQSYPPDTSHYNPHPPFPLFIPGQRGESGEPGIPGRSGDRGLPGQPGVPGNPGEPGRPGPPGEVSSWFDQLALHQSFSGEKGPYPEAFSYLQAHVGPVGPRGSTGPPGPSGPQGFQGIHGEPGVPGAPGPRGQPGERGMPGLPGKDGKPGANGITGPPGPPGPPGVRGAPGLPGLAGIKGHQGYPGADGAKGEMGSVGKKGAMGQQGKMGIPGPMGPPGLRGERGQEGPSGPPGLRGADGLPGLPGPPGPNGNPGPPGIPGLSGSKGDAGHPGPKGMQGLQGPRGEPGRLG…	0	2	2 (2)	4	1.42407e+06
Tt_015781-T1		heterogeneous nuclear ribonucleo A2 B1 homolog	237	26.4					MMVTSESDMDPEQYCKLFIGGLDYRTTEDSLKEHFEKWGEIVDCVVVRDPNTRKSRGFGFITYKKAYMVDDAQAARPHKVNGRVVEPKRAVPREDSGKPEAQATVKKVFIGGLKDDVEEEDLNDHFKEYGNIVSVNIVTERATGKKRGFAFVEFDDYDAVDKIVLKKHHILKGKKTEVKKALSKQELETARLKGMGSFGSREGGRNAPSYSGARGDYGGSPFESVQAMGGSTYRGQG	0	20	4 (2)	4	293471
Tt_016039-T1		endoplasmic reticulum aminopeptidase 2-like	913	105.8	F:GO:0016787	F:hydrolase activity			MLYIVIIATFALQKILCQDVFANMSESALFDTTEYPVQEDDFPWEEFRLPQFIKPLHYSIFMHPNLTTFCNEGRVNITLEVTEPTNFLVIHKRNMNTTIQAFLNPDEKYVSVVKSLDNEEHEQLYIEFDIFLEPSVKYMLQLQFSYQLQESQEGFFLRSYTLPAEEKRYIAVTQFQAMGARKAFPCFDEPAMKATFSLQIVHEKHYDTYFNTYLNTSLPYGNNLTLSVFNPSVRMSTYLVAFLVCDFDTVQRKTKSGVDIRVIVPQDQLSRSAHALECGIKVLEYFEDFLNISYPLPKLDMASIPDFPYGGMENWGLIFYAMDALLYDPVLSSSYSQQHVAEVITHELAHQWFGNLVTLEWWNDIWLNEGFASYAKDLGVNFFRSDWQMREQFVLDTVQ…	0	4	3 (3)	4	1.35012e+06
Tt_016209-T1		BPTI Kunitz domain-containing -like	84	9.5	F:GO:0004867; P:GO:0010951	F:serine-type endopeptidase inhibitor activity; P:negative regulation of endopeptidase activity			MSSLKLNYLTIVMVLLFAFSVFSQQDVAERCLQAPDRGNGTGFHFMFFFDRPSKSCRKFVYTGREGNSNRFSTLADCLIGCLKV	0.009	8	1 (1)	4	194978
Tt_017363-T1		aconitate mitochondrial-like isoform X1	787	85.6					MALNGGVVLCRGVKAMSLHARVRLLHATPACTALAKVAMSKFDKECFIPYEKLSRNLDIVKSRLKRPLTLSEKVVYSHLDEPESQEIERGVSYLRLRPDRVAMQDATAQMAMLQFISSGLSKVAVPSTIHCDHLIEAQVGGDKDLARAKDLHKEVYNFLKTAASKYGVGFWNAGSGIIHQIILENYAFPGVLLIGTDSHTPNGGGLGGVCIGVGGADAVDVMANIPWELKCPKIIGVHLTGKISGWTSPKDVILKVADILTVKGGTGAIVEYHGPGVEAISCTGMGTICNMGAEIGATTSIFPYNPRMNDYLVATGRKEIAKVANQFIPLLTPDKGCEYDQIIEINLSELEPHVNGPFTPDLAHPISKLGKQAKENGWPLEIKVGLIGSCTNSSYEDMA…	0.002	2	1 (1)	2	421404
Tt_017528-T1		ELAV 2	314	35	F:GO:0003676	F:nucleic acid binding			MEGDNQETRTNLIINYLPQTLTDDEFRSLFQTIGSIKTCKIVRHKSTGYSYGFGFVDYNTPVDAARAIQTLNGFQMQNKKIKVAYARPSGDEIKNANLYVRGIPATATQEDIELIFGKYGQIIQCRILKDDVTKKSKGIAFVLYDLREEAEEAINNLNGQVLPGGSMPLNIKFAEDNAKKVQATGPTMMLQRFASPFRGAYGGGGPMRQGGFQNRYRYNPMMYGMASTTIGEPGYILFVYNIGTETDEKSLWQLFSTYGTVQKVNVIREAATGISKGYGFVTMLNYEDAVLAIESLNGFLYAGKPLQVSFKTQK	0.002	6	1 (1)	1
Tt_017825-T1		histone-lysine N-methyltransferase KMT5B-A-like	510	59.2					MIVKGNAETMPSTRMTAKELCVNDDLVTSLVLDSYLGFTTHKMNFGFQYPKVGQKTSQIVEDFLQHQDYEKAYKQLLLGDWMTNFFYDKSQHQKQAFHDHAFRYLRMFDKEAGFEMKPCKRYSMDGSVGAKICATVKWEKNDKITYLVGCIAELTEKEESQLLQPGKNDFSVMYSCRKNCAQLWLGPAAFINHDCRPNCKFVSTGRDTACVKVLREIDVGEEITCFYGVDYFGDYNSYCECETCERKGTGAFSAYQVQIEDGETKSLYSFRQTDNRLNRMKRQATSRENTINSASLEPIVNILQNSTMKELRKKGLTQYDAQLLPSQGYKFKKPKIVLSLQKDLNHQNISRNQEIHSVCTKFQSDKFKRCHKHKYINKYNNCETEFENYTVSIDQPIPY…	0.017	2	1 (1)	1	989805
Tt_017875-T1		neuroglian-like	1259	140	F:GO:0004896; C:GO:0016020; C:GO:0016021; P:GO:0019221	F:cytokine receptor activity; C:membrane; C:integral component of membrane; P:cytokine-mediated signaling pathway			MSTINALILFACALKICKTISILDIPSPPSIIVQPSKKEQFFRVATTDDDPIIPITLECEATGDPEPTYYWTKNGEPFNATLFGERIIQHRGIGTLYFSKPLAIDEGKYQCFAKNYYGISLSNTISLRKSELHFFPLEKPKVVDVIEGSLLSLKCDPPKGYPKPAVFWMIQPNSGEPRSINSSRVSVDPEGGLHFSNVTKEDALDDAVYACIVSSIFRSELKVGNRRKLNVIPREIKGPVLQPPVKQYVSSSKITVLEGDRLELTCIYGGTPLPRVKWYFTKKGLIPIERLDKPVKIDKTLFIKSVDSDNEGIYQCVADNGVGSEQIYSITVTVESVPYWNVSPINFEAAEEENIRFECSASGKPPPKLQWLMNGEPMEKVDPNPRRFIEGNIMTISNL…	0.002	1	1 (1)	3	473107
Tt_018126-T1		cleavage and polyadenylation specificity factor subunit 6-like isoform X1	601	65.7					MADGVDIDLYAEDLEHDFSQEGEYNHDSNVDLYDDVITASTGDMGHPDEFGVNQDGISTRSVSSSGGPPTKRVAIYVGNLTWWTTDQNVIDAINSLGVNDVLDVKFYENRANGQSKGFCVVTLGSENSFRIVMDKLPKKELHGQSPVVTPYNKQSLNHFEMQARKPSPGNMGREGMGRAGQPGGGMRERESRGDRGSSGMNRGRSNGPPNFPSQQHMHGHHGLPVGPPPPQGPPPQFNQGPPPPQMHHPQGPPPSRPGPPPMVGHPGMPPPPPGMQGPPPPRHGGPPPVLPGNIRVPPPHGPPLSGPRGPPPPDTRGPPPLRNEWDRPPEQPLPPGVTSTRPPHPGPTVSHPPPHPPPGLPPTTAPPPHRPPPPVPPPGPGMPPNMPPPTSHPPAPHVN…	0	3	1 (1)	2	384798
Tt_018138-T1		AP-2 complex subunit alpha-like	955	107	P:GO:0006886; C:GO:0030122; F:GO:0035615; P:GO:0072583	P:intracellular protein transport; C:AP-2 adaptor complex; F:clathrin adaptor activity; P:clathrin-dependent endocytosis			MPAVRGDGMRGLAVFISDIRNCKSKEAEIKRINKELANIRSKFRGDKTLDGYQKKKYVCKLLFIFLLGHDIDFGHMEAVNLLSSNKYSEKQIGYLFISVLISANNELMKLIIQSIKNDLSSRNPIHVNLALQCIANIGSREMAETFGSEIPKLLVSGDTIDVVKQSAALCLLRLLRTLSDIIPSGEWTSRIVHLLNDQHMGVVTSAVNLIDALVKTNPDEYKGCISLAVSRLSRIVTASYTDLQDYTYYFVPAPWLSMKLLRLLQNYPPPEDPGVRGRLIECLETILNKAQEPPKSKKVQHSNAKNAVLFEAISLIIHMDSEPNLLVRACNQLGQFLQHRETNLRYLALESMCLLATSEFSHEAVKKHQETVVTALKTERDVSVRQRAVDLLYAMCDKT…	0.003	1	1 (1)	1	432041
Tt_018285-T1		epithelial chloride channel -like	973	108	C:GO:0016020; C:GO:0016021	C:membrane; C:integral component of membrane			MRGKEDFLALILFLVHCILLSQAVISINNGGYVGIVVAIHKNVPEDEQLVSNIKELFTEASSYLNTTTKGQVYFKEIIVAVPSTWSSKPGYEVVQKNYFPTADIKVDHPNPYHENNPYTLQPGGCGEPGQYIHLTPTFVKELHTKTLEKYGNAERHLVHEWAHLRYGVFDEYGLPGDPNYPAFYQENDKIVPTSCKQGITGWIESSGGGPCSITIDGTVNEDCRFIPDLSNEDAKASVMYLPYIPSITGFCDHTDNQLHNALAPTKHNNLCHNQPTWTVINKHPDFSRRFKRSVGFTSTKPKFRIVQSQPGSEGRYVLVLDVSRSMSLYNRQPIKLLHRAATRFVEDVISEGSQLGIVSFSTNTTILHNLTQVNSATRIKLRNSLPVNNDLGDTAIGKG…	0	8	5 (5)	9	1.32676e+06
Tt_018542-T1		26S proteasome non-ATPase regulatory subunit 1	984	109.5	C:GO:0008540; C:GO:0016021; F:GO:0030234; P:GO:0042176; P:GO:0050790	C:proteasome regulatory particle, base subcomplex; C:integral component of membrane; F:enzyme regulator activity; P:regulation of protein catabolic process; P:regulation of catalytic activity			MNITSAGGIISLLEENQPELKTFALKKLNQIVDEFWAEISEAIEKIEVLYEDQNFAQKQLAALVASKVYYHLGSFEDSLTYALGAGDLFDVNVSSEYVETIISKCIDHYTKLRIFNTASKLEDQKPVDPRLEAIVNRMFQRCFEDGQYRQAVGIALETRRMDIFERAILNSDNVQAMLSYSFRVTMSLIQNRHFRNEVLRVLVRLYKNLETPDYVNMCQCLIFVDDAQSVGDVLEKLSKGSEENALMAYQIAFDLYESATQQFLARVLQALRATAPVPSTITLPLISSKEKKEGESMETDQKELAGSQPLPEPTPKKEDLSEEQKKHQERIEKLATILGGEITINLHLQFLIRNNHTDMLILKHTKDAVRNSVCHTATVIANSIMHCGTTSDQFLRDNL…	0	2	1 (1)	1	658093
Tt_018938-T1		collagen alpha-5(IV) chain-like	1777	176.6					MKLEKVFFYLFITSLYLLLLVEHSEAAVCRGCKVQPCICVGDKGISGIVGLPGILGPPGPPGRMGMEGPRGPTGNRGERGEIGVIGQQGIRGEQGTTGFTGPSGVPGLTGDKGLKGKQGFPGCNGTDGKPGQSGNPGIPGARGSPGPLGDYGIRGDPGDGGINSIGVKGESGDDGQPGTIGLLGLSGLSGEKGVRGPPGNLGIKGDQGEPGPKGPKGEGREGSKGPKGNRGYPGDMGLQGPTGRVIPDPNIAHFKQGVKGEPGEKGEKGAKGEVGFDGSPGEIGIFGVPGPKGEKGERGDSGPRGKRGKDGPLGPSGVKGQKGQPGLTGEDGVPGIRGPPGEDGRLGNYGIQGPPGPPGPTIPFSEPLPGSPGRQGPVGERGDPGNPGKPGNAGPVGYQ…	0	1	2 (2)	4	381308
Tt_018952-T1		uncharacterized protein LOC106457258 isoform X1	723	79.9					MHSKKYRVTDVYYKSDNKTSSSTSTALDGKSSKQLTPEGTSFLSAKWNTFLPWSCCVLLGLCALAFILSMWLVGRYSSLGQNSFYKNTLKIGQTGHFRNDPYPGARTLGKLVVYPHQESRGDKNSSNHYIISLDKERSIKENVDIMRRILNDYPEQGARHGGHPGSSISKTTLVSDNCTILKNYGYDTNGHVISPCIVLGFEKEKGNGIQDDATVREKIPFANITCKAKNHFEKTKFRKLEIYRRTGFSTKTTTGKYVRFLVMVQLLELQRGSNVTVNCWAQNTPKNVLTNENKVEIFFSFHGKNDSRPPMSESTIYDYESTSQKAKTTLNNTVEWSFNETTRAVTSDTITTDYSHRSNQTEILTLGKLTTDQNILFNQTNKQSIDMTISTNWTSDHTT…	0	3	2 (2)	4	607839
Tt_019491-T1	Plc21C	1-phosphatidylinositol 4,5-bisphosphate phosphodiesterase classes I and II-like isoform X1	1229	139.6					DSSVGTPVTVRVDKKGFFLFWTDQNKETEFLEISSIRDTRTGKYARVPREGKLRDTVTMGAQDTPLEDKTVTVVYGPDLVNINFINFCCNRRETAQEWTDELLKMAYNLMAINASTTTFLEKAYTKLHLMTDRDGKLPVKNIIKMFAQHKDDKKRVEKGLELTGLPTGKNDCISPEKFSFDCFLTFYRHLVGRTEVDAIFEKLCGGNKKKGMTVDQLVDFFNKEQRDPRLNEILYPYATPARAKDIIKQYEPNKTYAQKGMLSVEGFLRYLASDDNNIMAPEKFDLNEDMDQPLSHYFINSSHNTYLTGHQLTGKSSVEMYRQCLLTGCRCVELDCWNGRNSDEEPIITHGYTVVTEILLKEVIEAIAESAFKTSSFPVILSFENHCSTKQQAKMATYC…	0.002	2	1 (1)	1
Tt_019529-T1		#NAME?	254	27.8					MPPLRRTLTISTVFLTISGIINMAWRSHGRNNVEMVQNLKKNGIINSEIVEQTMLSVDRAHYCKSNSYMDSPQGIGYAVTISAPHMHAHALELLKDQLYEGAKALDVGSGSGYLTACMAIMVGETGLAVGIDHIEELVNMSIENIKKDNLQLLESGRIKMIVGDGRKGYPDEAPYDAIHVGAAAAHLPDDLIAQLKPGGRMIIPVGREGNNQLLEQIDKLPTGEVKRSSLMGVVYVPLTDKESQWPSRYSKNEL	0.011	8	1 (1)	2	139711
Tt_019861-T1		serine arginine-rich splicing factor 3-like isoform X1	285	32.3	F:GO:0003723; F:GO:0008270	F:RNA binding; F:zinc ion binding			MSSRFAVSLYPCGCLLQKLKFSISLSHHRTLLLTSNVVIFLLDYLKLNSQVPCVDKKSLEQAVWKLYCNCVCSKTMSGRYRDSGPLDCKVYVGDLGNNGTKHELEEAFGYYGPLRNVWVARNPAGFAFVEFEDPRDARDAVRALDGRSLCGRRVRVEMSSGKSRHTQYRGPPSRPFNPEDRCYDCGERGHYARDCRKVSRRYRSRSRSHRSRTRSRSRGRSASRSRSRSRSRSPVAKVSRSRSGSREHSVSRSRSGSRSRSNRGKKKEPSDRSASKSPVNDSPGK	0	20	5 (5)	13	1.34869e+06
Tt_019910-T1	CARS	cysteine--tRNA cytoplasmic-like isoform X1	742	85.8					MADASSRVAKRSQPPWSPPTGTPIPKLKLYNSLSRQKEEFVPQFGNKVLWYSCGPTVYDASHMGHARSYISFDIMRRILSQYFCYDVFYVMNITDIDDKIIKRARQNHLWDQYLEKKLKEEVPQIIEDVNIALKPYQYKMETTTDPDKRTMLEKGIAKVTEALSYIQKLHTENENNKDISQNDKKKLLEAAKDPLADWLDSQLGAEVTDNTIFASLPQYWEEEFYKDMEALNVLPPDVVTRVSEYVPEIVAYIQKIIENGMAYESRGSVYFDTGKFDQTPNHHYAKLVPEAYGDNQALEEGEGDLSISDNKLNEKKSPNDFALWKSSKPGEPSWDSPWGKGRPGWHIECSVMASALLGESLDIHTGGYDLKFPHHDNEIAQAEAYFDNDHWIRYFLHTG…	0.009	1	1 (1)	3
Tt_020298-T1		ATP-dependent RNA helicase dbp2-like isoform X2	592	66.6	F:GO:0097159; F:GO:1901363	F:organic cyclic compound binding; F:heterocyclic compound binding			MSFRGRSGDRGMSRGRSGPQMRDNSMTRGSRGRGGGFGSRGGRGGMIQKSNGFKGKQPGDRLRKPKWDLSKLMPFQKNFYMEHPAVTSRPQHEMEMFRRMHKITVRGRSVPSHVQEFHECNFPDYVIAAIKQQNYIKPTSIQSQGWPIGLSGRDMVGIAQTGSGKTLAYILPAIIHISNQPRLERGDGPIVLVLAPTRELAQQIQQVASDFGRMSRIRNTCVFGGAPKGPQLRDLERGAEICIATPGRLIDFLEMGKTNLERCTYLVLDEADRMLDMGFEPQIRKIVEQIRPDRQTLMWSATWPKDVRKLAEDFLRDYIQVNIGALELSANHNILQIVDVCDDHEKDAKLLKLLEEIMGEKENKTLIFVETKKKVDDLTKRMRKDGWPAMCIHGDKSQP…	0	7	3 (3)	6	239163
Tt_020333-T1	RpS3A	40S ribosomal S3a-like	265	29.9	F:GO:0003735; P:GO:0006412; C:GO:0022627	F:structural constituent of ribosome; P:translation; C:cytosolic small ribosomal subunit			MAVGKNKGLVKGGKKGAKKKVVDPFTRKDWYDVKAPVMFSVRNIGKTLVNRTQGTRIASEGLKGRVFEVSLADLQNDEIAFRKFRLIAEEVQGRNVLTNFHGMNLTTDKLRSMVKKWQTLIEANVDVKTTDGYLLRVFCIGFTRKWPNQVKKTCYAQHTQVREIRKKMVEIMTREVSSSDLKEVVNKLIPDSVGKDIEKACQGIYPLHDVMIRKVKVLKKPKFELGKLLEIHGEGAGKPTTTTTTEEGTVIERPEGYEPPIQEAV	0	45	11 (11)	29	6.66011e+06
Tt_020503-T1	ALDH1A1	retinal dehydrogenase 1-like isoform X1	491	53.6					MGGVRNPKVQFTKIFINNEWHDSVSGKVFPTVNPATGDKIIDVQEGDKADVDKAVKAAKKAFKLGSTWRTMDASERGKLLNKFADLLERDKEYLASLETIDCGKPFRNARGDVEFGIKTIRYFAGWADKVHGKTIPVDGNLFSFTRIEPVGVCGLIAPWNFPLLMVIYKLGPSLAAGNTVVVKPAEQTPLTALYAGSLIKEAGFPPGVVNIVPGYGATAGAAISEHPDIDKISFTGSTEVGKLIQQAAGRSNTKRVTLEMGGKSPLVVFADADLDKAVEMAHIGCFYNQGECCCAGSRTYVQEEIYDEFVKKSRELAIKKIVGDPFDEKTEQGPQVDHNQFTKILNFIECGKMEGAKIECGGGRLGEKGFYVQPTVFSSVTDNMKIAKEEIFGPVQQLM…	0.002	3	1 (1)	2	718346
Tt_020885-T1		peptidyl-prolyl cis-trans isomerase FKBP2-like	154	17	P:GO:0000413; F:GO:0003755; C:GO:0005737; P:GO:0061077	P:protein peptidyl-prolyl isomerization; F:peptidyl-prolyl cis-trans isomerase activity; C:cytoplasm; P:chaperone-mediated protein folding	EC:5.2.1.8	Peptidylprolyl isomerase	MAFKEMFVKFCLMGILVLCLVEFVVIGDESSTPSTTTSKPKKLQIGIKKRPETCDKKSRKGDVLHMHYKGTLEDGTEFDSSYKRDQPLTFTLGSGQVIRGWDQGLLGMCEGEKRKLVIPSDLGYGASGAPPTIPGDATLIFEVDLVKIERKTEL	0.002	10	1 (1)	2	373381
Tt_021208-T1		m7 diphosphatase-like	225	25.4	P:GO:0000290; F:GO:0016787	P:deadenylation-dependent decapping of nuclear-transcribed mRNA; F:hydrolase activity			METLSKQVSDVAGEGGEVVTNENKKIKLSSEEEVKKPSASIHENISSFENFHLTKILNKNSSTKSIFVEGRFGNDVRPAVILLEKTLFVDESMKKMLCKDMTIKQQFHNDIYGSYEGFPSAEFNGVKTTIIHPATEKHIQKYSSHPAYLVQETPEVYNNVIKPHIQSQQFSMQMFGADGLVALHHKTPNQPTNFLCFFPNQNISTSVIWMSGFIIFWITNLKQTG	0.002	8	1 (1)	1
Tt_021267-T1		prolow-density lipo receptor-related 1	4787	535.8	F:GO:0005509; C:GO:0016020; C:GO:0016021	F:calcium ion binding; C:membrane; C:integral component of membrane			MTLRVYLEIVGLTGHSGLDRRSNSKCSSGLFLLLVLCVLIQLLVQSEQAESDKSILSEDALFLSDVPSRFSNADHGIAKSKRSFVHSNSNSGTVHPERDGLVKSKLPSTGFPKFGSCGQSGFECLDRKKCIPQAWVCDYSPDCDDGSDEENCEPRTCTPRQFQCASTLLCIPLGWVCDGEPDCGLDAEMKRDTSDEDVRKCNKGFACPKNYFRCNDGITCRRIVQLCDGVKDCPDFSDEGSFCENKTMCEGNSCKYGCRPGPMGPLCFCAMGEEPSDGECVDTNECHIEGTCDQICHNTPGSHECSCVGVYRQEGKHCYGINVPEDQPATLLYADSDHLYHIYLNGTLVEGASKTNVPEKTSLDFNHRNNSVCWIDDRNDKKTLLKCGKVFDLNTQWEF…	0	1	4 (4)	8	1.02182e+06
Tt_021437-T1	cathD	lysosomal aspartic protease-like	318	34.8	F:GO:0004190; P:GO:0006508	F:aspartic-type endopeptidase activity; P:proteolysis	EC:3.4.23	Acting on peptide bonds (peptidases)	MKVFIHVLSFVFIALSICEGLKRIPLYRVKSVRRHLQEVGTPVKLAKPTFHFKGNGPFPEPLSNYLDAQYYGPIGIGTPPQNFKVVFDTGSSNLWVPSKKCKWTNIACLLHNKYDSTKSSTYQKNGTEFSIQYGSGSLSGFLSTDVVTVDTVAVKAQTFAEAVSEPGLTFVAAKFDGILGLGFPTIAVDGVTPVFDSMVKQKLLEREVFSFYLNRNPDASPGGEIIFGGSDPKYYKGNFTYINVSKRGYWQFNMDSVSVNKKKGVYCNGGCQAIADTGTSLIAGPTDEIQKLNKEIGATPLAMGEVNYLVCFSVIAYL	0	5	1 (1)	2	319045
Tt_021517-T2		supervillin-like isoform X1	4138	465.7					MIYCCFITKLSSLYPSCDFTFQRQVERILLLWRIANLASSSKTGTMEEESPKTLISCLSSSEAKRVKAKSLPTGGRPGAVDHKALFSTFEKEERKQTKVKRSSETNGNRYSCFSFQSSDPKRSSDDDSSLNSDTSCSSVEFHRPCDLNRDSNLDKNTQVLPKNEESQYTTNSYNSLRQLNSNSDQFFKTSNVFLDISYRCGKKDSTISSRSSKSSTDSWSRKERREALKARVEAKREQLCGSSSSDDESNETIDRYYSDEALHRSFRENRGRFIRTDRHFKRRSQEESSFNKLAKNGTSEAFLLDKKPEECQKKPPPAPQGNSGVVWQESILYRDPVFDPYIKSPNLDSSQSSYHSALESTKENYYFYHHPHCITRRTVSENIQPNDRIIKDKKPSPVK…	0.002	0	1 (1)	2	91712.7
Tt_021522-T1	UMPS	uridine 5 -monophosphate synthase-like	474	52.5					MCSIKLASLYSTLFEIGVIRFGHFTLKSGLQAPVYIDLRLLVSHPDLLEAFATEVWNTLKRQGIEYGIVCGVPYAALPLATCVSVRFNVPMVIRRKEAKGYGTKKLIEGDFKQGQRCIIVEDVVTSGASIWETVELLAAEGLTVTDAVVVMNREQGATKNLKDLGITLHSVCHLTECMKALHQLGKIDADTVYKVTKFLEINNETKIPTHKSVTSCKERKVLSFKERASLCQHPLTKRIFGIMEEKKTNLCVAADVTLCAKLLEIAETVGPHICVLKIHADILEDFNSEFPEKLKDVAKKHNFVIFEDRKFADIGQTVYMQYTKGTHKIVEWADIIDCHPLPGPGMLEGLKQAGIKKGRGCLLIAQMSTKGNLVPANYPEATAHFADHHRDFVIGFISQ…	0.009	2	1 (1)	1
Tt_021973-T1	snRNP70K	U1 small nuclear ribonucleo 70 kDa-like	385	45.4	P:GO:0000398; F:GO:0003729; C:GO:0005685; F:GO:0030619; C:GO:0071004	P:mRNA splicing, via spliceosome; F:mRNA binding; C:U1 snRNP; F:U1 snRNA binding; C:U2-type prespliceosome			MTQFLPPNLLALFAPRDPIPYLTPVDKLPHEKNLKGLKYTGVGLFLSDFEDPKETPPPTRIETREERQERKRREKAEQTAYKLEQDIALWDPHNDTNGTSDPYKTLFVARINYDSSESKLRREFEVYGPIKKIVLVHDNTTGKPRGYAFIEYEHERDMHSAYKHADGKKIDGRRVLVDVERGRTVKGWLPRRLGGGLGGTRRGGPDVNVKHSGRDDGRMDEKYLSDRGDRERERERRRSRSRSRERRKRSRSRDRYKDRRRDRERQAETPLEGNNEVVSENDKRKRSRSRERDRKRRRSRSRERKKREKEREGRRDKEGRVKVEPVLKPEISQDGYSSSSMGYEGGDFNYNADSAYDIKYNNNSNNNNNNNNNDNNIEEFAEEGF	0	8	2 (2)	3	199418
Tt_022013-T1		methyl- -binding 2-like isoform X1	296	33	P:GO:0050896	P:response to stimulus			MSSNINENEEVCNGKKVNQKRTEGKNISTNGGESESNREVLTSEKKSSRKPLEVSKDENTTQVGSADETAASEESVEKDSSKPNKKNESSKKVQAVPKVEENTDGQEISEPTMPPGWSRKVVQRQSGKSAGKYDVYLFTPDGKKLRSRIELRSYLSKYNIDIDIENLFTLTGKTSKVLAKSVTKRKSSSQKWSSSPKKKKSRSSSVSSTRKKTPKLRVKLTSLKKRILSNYVQQESTKEVSEQNLSIKGQSNDSPQKKLAAKKTYSPKVGHTGHKLKKSNEKKSKLKTNKSKGKKK	0.002	4	1 (1)	1	1.56818e+06
Tt_022144-T1	Aats-gln	probable glutamine--tRNA ligase	781	89	F:GO:0004819; F:GO:0005524; C:GO:0005737; P:GO:0006425	F:glutamine-tRNA ligase activity; F:ATP binding; C:cytoplasm; P:glutaminyl-tRNA aminoacylation	EC:6.1.1.18	Glutamine--tRNA ligase	MSAMEDTVAKFMSIGLSEVKAKETLKNESLSKTLFETIAEAEKYTKKDIPKPMGNLLYHTASKVKTQIKHRIPLLIEYITTSKLDSELKLSAALDYLLSHPADPLDVAKFEASSGVGVVITPEEIEKVVEEVIAKNKEELLQNRYQFNMGKMIGEAREKLKFADGKSVKNEVDVQVLDLLGPKTAKDKEKPKANKGKEQAKPKQIPMINGESHSKDELIQPFGAKTIAELMKTKVNFHKPGENYKTDGYVITENTMNLLKEHLQITGGQVRTRFPPEPNGILHIGHAKAININFGYAQAHGGICFLRYDDTNPEKEEERFFKGIQDAVEWLGYKPYKITHSSDYFQELYKFAKELIRKDMAYVCHQKHEDLKGFNSPPSHWRNRPVEESLQLFEDMRKG…	0	2	1 (1)	2	68117.2
Tt_022180-T1	PMPCB	mitochondrial processing peptidase beta	499	55.6	F:GO:0004222; C:GO:0005743; P:GO:0006627; C:GO:0017087; F:GO:0046872	F:metalloendopeptidase activity; C:mitochondrial inner membrane; P:protein processing involved in protein targeting to mitochondrion; C:mitochondrial processing peptidase complex; F:metal ion binding	EC:3.4.24	Acting on peptide bonds (peptidases)	MRTVLHLRSTYFILTITTLSTVCMKMATRVLKVSGTLLRFAKPGRKCVRFQHTAKPAFAQTLLNVPETRVTTLTNGLRVATEDSGIPTCTVGLWIDTGSRYETDKNNGVAHFLEHMSFKGTSKRSQTDLELEIENMGAHLNAYTSREQTVYYAKSLSKDLPRAVEILADIIQNSTFGEQEIERERGVILREMQEVETNLQEVVFDHLHAVAYQGTPLGRTILGPTENIKSISRQDLVEYITNHYKGPRIVFAGAGGATHEELVKLVDQHFGSLKTTYEGEIPILTPCRFSGSEIRVRDDSMPFAHVAVAVEGCGWTNPDNIPLMVANTLIGSWDRSHGGGSNVASKLGQAATLGNLCHSFQSFNTCYKDTGLWGMYFVSEGLSLEDMLFNVQSEWMRLC…	0.003	2	1 (1)	4	380546
Tt_022184-T1		---NA---	113	12.9					MKKRPPEHQKFIILEVHINDSVATKMNENIKGKQNLIMGLGPLRDDVRMIVSDDHKKARLNQYLCSIPHFQQLVDEDKVEQDNCINFELVKIKLENLKNHNASEPGVFTQGGG	0.029	6	1 (1)	6	6.85069e+06
Tt_022462-T1	ECH1	delta(3,5)-Delta(2,4)-dienoyl- mitochondrial-like	319	35.5	F:GO:0016853	F:isomerase activity			MVSNVICGLIGRVITRTSPRIPVQSLAGVISSRNISEKARYTMSYETLDITSPHERILHVQLNRPDKLNAMNKVFWREILDCFREISDDTDIRVVILSGAGRMFSAGLDIGDMTDLITSQVTKKLDVARRAKYLQSLITLYQESFNALEKCQKPVISAIHGGCIGSGIDLIAACDVRYCTQDAWFQVKQVDLGFAPDMGTLQRVPKAIGNNSMLREMVYTARKVEGFEAKEMGLISRVFPNKEAMLSEVDRLAESIASKSPVAVQGCKVALNYSRDHTISEGLKFMQCWNMTMLQSEDVIKGSEAVATKAEKPPHFSKL	0.002	8	2 (1)	2
Tt_022499-T1		saccharopine dehydrogenase-like oxidoreductase	347	38.5	C:GO:0016020	C:membrane			MCKQSRLILNTVGPYRFYGEQVVKACVANGTHHLDVSGEPQYLEQMQLKYFEEAKEAGVYVIGACGLDSIPAEMGISFLKQKFDGDVNSVETYMSLKNGPKGSKVNFGTWQSAIYGLAHASELKGLRKQLNETLFQEPLPKSNFPLKRRGILFKSDVANGWCIPFLGSDRSVVLRSQMFGYNHLKERPVQVQTYFCLPSLLACLVTMFMATIFFLLASTKFGRYLLEKYPGFFSLGTFSRDGPTREQVKGNSFTYTIYGEGWTAKLTDPTDQHKDKPDKNLTIVIKGPDAAYLAASIFLVQCGLTVLKDEDKMPGKGGVLTPAAAFAKTPLVGRLQSRGVDFTIKDS	0.002	4	1 (1)	1
Tt_022505-T1	Mal-A2	maltase 1-like	678	76.4	F:GO:0003824; P:GO:0005975; C:GO:0016020; C:GO:0016021	F:catalytic activity; P:carbohydrate metabolic process; C:membrane; C:integral component of membrane			MENENYKGATVSESSVEVKDEPNPVVEPEIDEEAAVKERLTSDDPTKVKFSPEKFHADENGEAKVDIENVQNFVGMGKDELMKYANDPFWIRLRMLLFVLFWVLWVAMLVGAVIIIILAPRCAPPPQREWWQKSSIYQVHVKSFKDSNADGVGDLKGLTSKLDYFDSLGVKALALNPIYPSGSEVEGYDITNHTDINTDCGVMEDFEDLLNKMKDKDMKIILDFVPNHSSKNHWWFQQSEKRVDPYTDYYVWADPKSSSPGEGRKEPNNWKSVGGGSAWEWSSVRKQYYLHQFKVSQPDLNLRNEMVKEELVDILMFWLNKGVDGFRINDVSYLFEDKMLKDEPLSGDADAGPDDYSSLDHKYTKGLPETFDILKEWKEVLSNFSDATSSYRVMILDVR…	0.004	1	1 (1)	2
Tt_022718-T1	LBR	delta(14)-sterol reductase-like isoform X2	634	71.7					MSKENKFDVGDVISAKWPGSKTYYPATIVGKTKYRYYVEFKDGSKSTLSLDSVQAPDSPPKRSSRSPARQQSPKKSKKSQSRSRGRQSPSRSRSSSRSRNKKELGSRGDAEINQVNPSKTPPRSPARVRKVIKTAELKMESLPTSIQYLDKMTKVMDEYEPSPSRDVGKVSDVIMPLRASVRIAALQASKAVVEATEVGSNNESKTASIKPVEDEDDDSITLKPSKKYEMGGPIGAFLMSLLLPALCVYVHLACTRYSCTIKQLPVFLKYGSRDPALFYVGWILFQAVLTALPIGKVVEGLPVRCENGFSKLKYRMNGFITLVVNLLMLTSMLYFKCPVSFVYKNLFQLMVISILFSIFMSVALYIKGCRAPSYAQNEAGLSGCPQYDFFQGRELNPRV…	0	3	1 (1)	2
Tt_022979-T1		kunitz-type serine protease inhibitor A-like	132	14.4					MISYDLVCVCQFSTNEGLDKDCQSPPVTGPCEAIIPRYYYDPESHQCKKFNFGGCGGNGNRYETIADCLSACSGRAKECKSPPVSGPCTAYIPSYYYDPDSHKCKKFIFGGCDGNENRYRSEADCLAACLGT	0	27	5 (5)	11	3.20253e+06
Tt_022980-T1		kunitz-type serine protease inhibitor A-like	129	14.3					MLKRNERQKQQEQSLDKDCKSPPVIGPCEAIIPRYYYDPESQQCKKFNFGGCGGNGNRYETIADCLSSCSGRAKDCKSPPVSGPCTANIPSYYYDPDSHKCKKFIFGGCDGNENRYRSEADCLAACLGT	0	28	3 (1)	4
Tt_022984-T1	SPINT2	ame: Full= ase inhibitor ame: Full=BPI-type	81	9	F:GO:0004867; C:GO:0005576; P:GO:0010951	F:serine-type endopeptidase inhibitor activity; C:extracellular region; P:negative regulation of endopeptidase activity			MSRKVLLFVVGILLYVAVTAAKGPFLDCTSPPVTGPCRAEFKRYNYNTRTKQCEPFIYGGCKGNGNRYKSEQDCLDACSGF	0.031	7	1 (1)	2	4.3223e+06
Tt_023280-T1	FARSA	Phenylalanine--tRNA ligase alpha subunit	495	56.7	F:GO:0000049; F:GO:0004826; F:GO:0005524; C:GO:0005737; P:GO:0006432	F:tRNA binding; F:phenylalanine-tRNA ligase activity; F:ATP binding; C:cytoplasm; P:phenylalanyl-tRNA aminoacylation	EC:6.1.1.20	Phenylalanine--tRNA ligase	MADITTRVLEHLAECGPVDSLTLAVKLGIDHQRIVGAVKSLQSLGNVITAEQRSSKQWELTNEGEEVVEKGSHEALVYYNVPEEGISQKELMQTIPNAKVGFSKAMSAGWLVVDKTAEGGPKIRKKVDKIHDDVQDCLLKFKNMNIDGIIESQKQEFKKRKLLQEVTVKSYWLEKGPQFSLTVEKQETDLTPEMITTGSWKEKKFKPYNFDAMGAPIECGHLHPLMKVKTEVRQIFLEMGFTEMATNNYVESSFWNFDTLFVPQKHPARDLQDTFYLSDPVHANEFPLEYLERVEAVHSVGGYGSQGYNYEWKFEEAKKNVMRTHTTAVSARMLYRLAQQKKFTPVKYFSIDKVFRNENLDATHLAEFHQVEGVVADYGLTLGNLMGLFKEFFNKLGIR…	0.002	3	1 (1)	1
Tt_023544-T1		hydroxysteroid dehydrogenase 2	411	44.3					MLNTGKLAGQTLFITGASRGIGKAIALKAAKDGANITIAAKTAEPHSKLPGTIYSAAKEVEEAGGKCLPCVVDIRDEEQVKSAVENTVKEFGGIDILVNNASAINLTGTLETSMKKYDLMHNINTRGTYVASKHCIPYLKKSSNPHILNLSPPLNFQPRWFKDHVAYTMAKYGMSLCVLGMAEELRPFKIAVNALWPKTAIITAAMEMLGGNEIDKNCRKPEIVADAAYAILTRKSDSFTGNFCIDEHILKEAGVTDMDQYAVSPGHPLLPDFFLSDDDLKTFDSISDVTIENLKQPGGEKSSGKVFSKIEGLLSEDIVKSTGGVFVFDITGDPKETWYIDLKNGSGSVGKGDPPVNGDVTFTVDPESFTQMFTGSLKPTAAFMSGKLKIKGNMGLALK…	0	10	3 (3)	7	1.68763e+06
Tt_023737-T1		E3 ubiquitin- ligase Rnf220-like	116	13.3	F:GO:0004842; P:GO:0016567; F:GO:0046872	F:ubiquitin-protein transferase activity; P:protein ubiquitination; F:metal ion binding			MTEESRLSDITEGNRSVPESVSNIPDTRLMQVDENADPNKLIDLLQDRLKELQTRQQKSPTLKCQLCQGLYEKPVVSVCCWHVLCERCWLQALGVKRVCPQCETITFPSDLRMLNV	0.027	8	1 (1)	2	1.53744e+06
Tt_023941-T1		40S ribosomal S11	204	23.7	F:GO:0003735; C:GO:0005840; P:GO:0006412	F:structural constituent of ribosome; C:ribosome; P:translation			MADQIGKHLLLTHPTNKREVTVVYNQFLSPEVETVYVEMQFSELAFYRKDVQSERAFQKQPTVFLNRKPTLAKQKSKKSLRYVKNVGLGFKTPKEALTGTYIDKKCPFTGNVSIRGRILRGVVIKMKMQRTIVIRRDYLHYVRKYNRFEKRHKNMSVHLSPCFRDVALGDIVTVGECRPLSKTVRFNVLKVTKASGAKKGFQKF	0.002	8	2 (2)	3
Tt_023955-T1		ran-binding 3-like	435	47.3					MSEEGTSAASNSTYSNPFSIKMSACSPTKSSADSTDSQDAFQMVTSSASRFMLRPSPLAAQAEKLKTSGSCSSDSPSLTFASHKQEDKENKSVSDNLEQFGDSDSAHLSSNSSNGTKKQVTSSISRSPETLRSSEDSPFKSLFKSDCNKSPVSSESKATAAPTNFVFGQNLHERVVTYEDPGSDSSSSISNQLTFQAFQKSSSEDESKDECSGKLVKSLTESAKEYQAKQIKRKYEEVTVVTGEEEESNVLQINCKLFAFEKNNGTWVEKGRGILRLNDREVDGVLQSRLVMRTQGSLRLVLNTKVWAGMSLEQASHKTVRISAIDTDGVKVYLIMANPKDSEQLFSALECRVANLKSLDDNWSDSNLATQASVGSFDDDDTTTSDCESEVKRPRRMED…	0.002	4	1 (1)	1
Tt_024071-T1		Na(+) H(+) exchange regulatory cofactor NHE-RF1-like	293	32.8					MSSSELPPDAPAPRLCHLVKWPDFDGYGFNLHAEKSRAGQFIGKVDVNSPAEFAGMKEGDRIIEVNGVNIANENHKQVVERIKAIPHETRLLVLDEEADKWYKERKIVVRNTQSNVIHCKTPSKQPIKGSDELATDINGENHNGTDHVSEEENDSGSVGHESPVLQTEGEDLKPSATEPEAEINYQSADVERESPDAIEMKEENKISPASTPKSQDSGSRQRSVDSASDSPQSTRSAQSQNEQPETKMKASSEDLNLNMSASEMRQILSARRKRDPRKEQMDMREKYHIIQQM	0	10	2 (2)	2
Tt_024800-T1		chymotrypsinogen A-like	412	42.3	F:GO:0004252; P:GO:0006508	F:serine-type endopeptidase activity; P:proteolysis			MQKLITDCLCVLVFLAAIVWSTTDKNESPKWRGEYSDKTGPEWRKAEDTRETEEVPGEISRRWGGGDGGGYVGGFGAGVGGGCGVYGGEFGAGEDGGGRYGTGGGNRGEYGVGGVDVGGGYGAGEAGKGNGGEFGAGKNNSGEYGIGGVNGDDIGAIEGVGDCGGFGVGGDNGDGYGVFGDNGDGLGTGGGNGSRYGSAVDNGNGFEDSQDHSVLGTGGGQEHGTGTIGGNGGDETHGGGFESGGNSDFDEDCCVLFYLCKDGNVITDGSGIIDSRKKLVPSSEPLLDARLNPKSAFGCGAFHVCCKTPSTVTEKPYVHQCSFRNVNGLNKRILTAHGKGLAEFGKWPWQDDGGGPLMCWRKDGTYGLAGIVFWGIDCGQSDVLGVYVYIQNYLDWIFS…	0.014	2	1 (1)	2	19097430
Tt_024852-T1		eIF-2-alpha kinase GCN2 isoform X1	1672	190.8					MEESLQERQENELNVLQAIFFDCIKDLRNQDVWKVWRPPEVQITLHPQQSMTTGKEVHVQLDLIVRCTENYPNEPPHFSLKNPVGLSNHAVEELREQLVEISEKLKGEVMILELAQHVQKYLHLHNTPRYQSFYDEMLSNKKHLEEKQAEALERQKERQKLLEEKQRQAIQEEIQRKKEALKEEARKRREQIHQSSPNRTRSEHEDKEIVEKYKKERSPSTSRSKSNSPTPKLSASSRRKSTSRCEEDCNHGKITVLTFNNKDKRTIQRGHCLGHSPRGSAVFAGMDTNTGELLTITEWVIKWRHLSRKPTSAEMEVFRKESSAYLKQISSIEQEFGSVIRLYHRNLVHYLGLKYMLEKDKIVIHVLQQHVPGSTLSLYLHENIPLESSMLRHYACGIL…	0.03	1	1 (1)	1
Tt_024909-T1		dipeptidyl peptidase 3	721	82.3					MSEFVFPNDQPVVLLDSEKAFEALTNEEKLYAHYLSRAAWYGGLIVLIQTSVESPLIYTLLHKIYKQQSLKELHQVAIEGCDLTDEDFQALLVYSSGIFTNMGNYRGFGDSKFIPNLPKEKLEKLIKSSSASKSEPDVINFLWEKCSEKMYSLKDQEKHLGFADKGTTTYFSKTCRQEDADLLSKFFKEKGMEAYNTRTFKTVNENGEKVYEIRLASVVSTEDDEEKSLIGMCQVDGMKFIVTRGDYSRLLAYAITYLQKAKEHAANENERQMLNNYIKSFETGSLEAHKDGSRFWIKDKGPVIETYIGFIESYRDPAGMRGEFEGFVAMVNKSMSAKFAELVNSAEKFLPRLPWPDTYEKDKFLRPDFTSLDVLTFAGSGIPAGICIPNYNDIRQNEG…	0.002	3	2 (2)	3	78260
Tt_024917-T1	LGALS4	galectin-6-like isoform X1	326	36.4	F:GO:0030246	F:carbohydrate binding			MSLMNKVIQKAEKEPGLHYRNPSVPHVCVIPGGLSIGTKIFVQGTVPKNPDRFAINLKRGSDPDSADIYFHFNPRFQDTACVVRNSYSGEWGEEERDGDSPFSPTMPFLVVISAFSNGYEVEVNGNTFTTFQHRDGLPLSNVTHLSITGDVIIQAIQIPIETLPKHLRLSIPGETKIGDMFYIRGEVSGDAERFIVNVQCGPGMADDVVFHFNPRFPDGVVVRNIRSDDTWGEEERDGNMPFTPGDAFDLVICAASDGFHTMVNGQEFIKFGHRLEMHKACTLYIEGDLAIKDVWINSTPTHLPPDFDDTPRDLQMSSLQHFVLQV	0	5	1 (1)	3
Tt_026536-T1		sperm-associated antigen 7 homolog	231	26.7	F:GO:0003676	F:nucleic acid binding			MADLLGSILSSMDKPPPVNDTQKKLIKKQKEQYEKHQAAEKAKLAKFRKDIEEKINKFLQDPSQHKHKFSSMSKVHRSVIHDVADIAGLTAFSFGEEEVDRYVMLFKKEFAPSEDELQAYRRGEDWNPEKAKEVARQKELAKKEAEENEKRSKEQAVCSRYQKRNEKRLGKEAAKDAEKIIFTNRQFGFVPSENKRDQRSIEQTLADLKARKKQKVEHNGQSDSSSTEIGN	0.008	4	1 (1)	1
Tt_026737-T1	Sirt6	NAD-dependent deacetylase sirtuin-6	428	47.6	F:GO:0070403	F:NAD+ binding			MSCSYADGLSKYENKGICGLPEVHDQEEDLTIKVIQLVQWIRESKHVVVHTGAGISTSAGIPDFRGPNGVWTLEEQGEKPQINISFDSAIPTKTHMAIAEFVKLGLIHFVVSQNVDGLHLRSGLNPEKFCELHGNMFLEKCKQCQRLFIRGKASVTVGQKCTNQACLWRKPNGRLCRGKLHDTILDWEDELPEKDYELADAHSRAADLSLCLGTTLQIVPSGGLPLLTKKNGGRLVICNLQPTNCDQSADVIIHDYIDNLIEKIAAHLGVSIPMYCPEKDPTLKAKSSLVEYSPLRHLPPRHLLKHKSVLLSNVLPRPDKPPKRKFEKGHQEGKDETKYQRTKCKVTDKKMIETTQGYSGSKTNFNVKGLTSVSSVTKKEPTQSIYNSTKESNLNLNKS…	0.003	2	1 (1)	1	204889
Tt_027072-T1	RpL15	60S Ribosomal L15	204	24.2	P:GO:0002181; F:GO:0003723; F:GO:0003735; C:GO:0022625	P:cytoplasmic translation; F:RNA binding; F:structural constituent of ribosome; C:cytosolic large ribosomal subunit			MGAYKYMQELWRKKQSDVMRFLLRLRCWHYRQLTSVHRAPRPTRPDKARRLGYRAKQGYVIYRVRIRRGGRKKQVPKGCTYGKPKNHGVNQLKPVRNKQSVAEERVGRRCGALRVLNSYWIAQDSTYKYFEVILVDPFHKAVRRDPKANWIANAVHKHRELRGLTSAGRKSRGLGKGHRYSKTIGGSRRACWKRRNTLQLRRKR	0.003	5	1 (1)	2	199668
Tt_027558-T1		---NA---	105	11.9					MTANCFDYAKIDSLKLPILYELNEKNSKMYRYQKFLSMTDCDRLVITHISPLDTGNMCCSISKSDLKPLAKVLSGFEVQWEIRGLKRLLLPAKSATSSADDIVWD	0.04	14	1 (1)	1	251072
Tt_027912-T1		clotting factor B-like isoform X3	438	49					MLSTSSERSRRMTLLALLVSVLVLQSEACALRIGTRVSKTRVTLPFWQPGTDQLHTNHNNFRTFRPITIVPLIVRAVKQIRIDRRNVVFYPYDPNDSTVEEDRCSDFLGKVGVCLSLRKCWSRIGVVNLDTFHNGLCGWLAGEPIVCCPYPILTTGFLPFLPTERPYPKVTPTPQTPQPTVEVSTESSTMSSVTTPDVTEPGSDNIFECGAAEPILEGTWPWTVRFSESDSNVLCQGTLLSRLYVVTVASCVELYRQTPEKLRVVVGRKTLENEVRSIRIHPERELNSNFDVALMQLKNPISFNEDALSICLPSSSTSSSSFQDKPALFAGFNRKTGSGTVNSVQTTGILKKGNECNPTTSQTKNGEDETQFCLVSDVPRTDCQYIPGNVAMAVDNERR…	0	8	2 (2)	6
Tt_027999-T1	Dgk	diacylglycerol kinase 1-like	904	101.9					MMTLKWEKLSPAEFQQLQDYIQFSSRKLTDVLQDEFKEDGTLSKYNPEGDIDYDGFQLFLDTYLEIETPRDLVKRLFLSFVRKQPQQSTSTIDGRFLKMAAVTSTTACAPITSHKTSGSLPELAKDGQTERKDEKHHGKDGQTERKDEKHQSLAEKIHGLTEKLHHLGHNRSDSDSSRGRAGSASIYPMVTVTQNYMDQKSTDSSPCHSQMSRNSSRKSNSSMLIHNIDLKPLRKASSHVDIHALRVQLKEIVCYLSLLEAGRPEDKLEFMFRLYDTDGNGYLDNNEMDCIVNQMMSVAEYLGWDVSELKPILQDMMVEIDYDADGTVSLEEWKRGGLTTIPLLVLLGLDSHVKDDGNHVWRLKNFSRPAYCNLCLNMLVGFGKKGLSCLFCKYTVHER…	0.036	2	1 (1)	1
Tt_028465-T1		WD40 repeat-containing SMU1	513	57.9					MSIEIESADVVRLIQQYLKEHNLMRTLQVLQEETSISLNTVDSIDSFTQDINNGHWDTVLKVVQSLKLPDRKLIDLYEQVVLELIELRELNAARSLLRQTDPMIKMKQEEPERYIHLENLLARSYFDPREAYPDGSNKERRRAAIAQSLAGEVSVVPPARLLALLGQALKWQQHQGLLPPGTTIDLFRGKAAIKEQEEEKYPTQLSKQIKFGQKAHIECGRFSPDGQYLVTGSVDGFIEVWNFTTGKIRKDLKYQAQDNFMMMDDAVLCLCFSRDSEMLATGSQDGKIKVWKIQTGQCLRKFERAHTKGVTCVMFSRDSSQLLSASFDQTIRIHGLKSGKFLKEFRGHTSFVNEVVFTNDGHNILSASSDGTVKLWNVKSTECINTFKSLGGTSGTDIT…	0	5	2 (2)	3
Tt_028913-T1	HMCN1	Hemicentin-1, partial	576	63.5	F:GO:0005509; P:GO:0007155; C:GO:0016020	F:calcium ion binding; P:cell adhesion; C:membrane			MCCYYVAPVVLAAPGPQAVRLADPIVLNCAVDGDPFPQIIWTKNGQHVELNHRIQQMTNGSLVIYKSLSEDTGHYKCVASNEYGAAEGTAMLVVKSGPSFVVEPHDTVVDLGETIMMDCKATGEPKPDIKWQKAHSSLAHDGHMTVLANNTLRIVAVQISDEDIYSCLATNPLGSVLKDAHLLVRVQGMWSPWEKWGPCSTTCGEGMLQERLRVCGNPPPKNGGKGCIGPERETRMCELKPCPVDGTWGNWKEWGGCSATCGEGVRIRKRLCENPSPLYGGKDCVGSDTEEETCLVKKCPVNGMWGQWLAWNPCSLTCGNGVRSRTRICDSPAPIHDGLPCLGLEKEEETCQQKECEIHGVWGDWNQWSRCSLSCGGGTRKRQRFCDSPQPAHGGRYCA…	0.002	3	2 (2)	3
Tt_029518-T1	TfIIS	transcription elongation factor S-II-like	298	33.1	F:GO:0003676; P:GO:0010467; P:GO:0034645; P:GO:0044238; P:GO:0044271; F:GO:0046872	F:nucleic acid binding; P:gene expression; P:cellular macromolecule biosynthetic process; P:primary metabolic process; P:cellular nitrogen compound biosynthetic process; F:metal ion binding			MGCEDEVLKIAKKLDKMVASGAQGQDQALDLLKTLQELPITLEVLQKTRIGMTVNSLRKSSSDEEVISLSKSLIKSWKKLLSGKGDGNGDGCGKEKSDLNSSSAGQSSNQQTTPSPTPASLKNSPKQVTFPSDTTNAVRLKCRELLSGALKCDEVSDNIEDPEELAAKIEHFIHEEFKDTNFKYKTRVRSRVANLKDSKNPNLRLNVLRGLITPERLAVMTAEEMASEEMKNLRQKLTKEAINDHQMVLTGGTKTDLLKCGKCKKSNCTYNQVQTRSADEPMTTFVYCNECGHRWKVR	0	9	2 (2)	3	803717
Tt_029831-T1	CDA	Cytidine deaminase	145	16	F:GO:0004126; F:GO:0008270; P:GO:0009972	F:cytidine deaminase activity; F:zinc ion binding; P:cytidine deamination	EC:3.5.4.5	Cytidine deaminase	MTESKTEPVPWDVAELLKSSQDACSKSYSPYSKFRVGAALLCEDGQIITGCNVENASYGLTICAERTAVVKAVSEGYKVFKAIAICTDVKDKFIAPCGACRQVLAEFGTDWYVYVAKPDLSYKKFTVGEFLPHSFKHEDLKMEKV	0.002	9	1 (1)	2	220985
Tt_029967-T1		vigilin-like	1271	143.3	F:GO:0003723	F:RNA binding			MDAVQHSAAYQSTNEEISDASLKGLSLEGSEAYTPQTVYNYDDLFPALPEKELIQMTPQTDMGQWNRQMKVRSSVITQVFRVPLEERKYREMSTNRFGEQGEQAKTCAEIMQKTGAHIEVSSSKDQSLTILVTGKEDAVLKARRKIVNELQTQAVINISIPKEHHRFILGKNAKKLSELELSTATKIVVPRPEDNSDIIRISGTKEGTDKAAHEIQVISDEQAKLAFERLNIPKIYHPFICGPYNEYINQLKNQTGARINVPPPSVIKDEITVAGEKEAVAAAKEAIMEIYKEKQRKCQTVSVEVKKAQHKYVIGTRGQTIQEILAQTGVSVEVPSTDNPSETITLRGEQEKLGPGLSMLYEKANSVVMAEVDAPSWLHKYIIGRKGVNIKHVTQDLTR…	0	5	4 (4)	8	1.38916e+06
Tt_030589-T1		endophilin-B1-like isoform X3	367	41.5					MRPIYVRLTWRDDTGVYPVMMEFGVKSFKGFVSEAATAFSRVVQYTEEKLGTSEKTELDAHFESLAQRADKTKHWTERIVSRTDAILQPNPNAKVEDYLFEKLERKRDRQTNFEALGQDMIDAGSDFGPGTAYGSTLIKVGQAQKKLGKAEKEFVRIASTSFIQPLRKFLEGDMKTLQKERRILESKRLDLDACKNRLRKAKSMEAQANAEQELRVAQAEYDRQAEITKLLLEGVSSAHANHLRCLNDFVEAQMSYFTQSQQYVADLQREMSSMSVALSSGGTTDSFQNIYPSFSANAGPVSPAPDDKRKQARVLYDYDAHDKSELSLLADEVIYVTSEPGQDPDWMIGERGKQKGKVPTAYLEMLN	0	9	3 (3)	5	486138
Tt_030598-T1	RPS5	40S ribosomal S5	188	21.5	F:GO:0003723; F:GO:0003735; P:GO:0006412; C:GO:0015935	F:RNA binding; F:structural constituent of ribosome; P:translation; C:small ribosomal subunit			MLACFFKRFKKLIHLFFKRQDYIAVKEKYARYLPHSSGRYANKRFRKAQCPIVERLTNSMMMHGRNNGKKLMAVRIVKHAFEIIHLLTGENPLQVVVNAIINSGPREDSTRIGRAGTVRRQAVDVSPLRRVNQAIWLLCTGARESSFRNIKTIAECLADELINAARGSSNSYAIKKKDELERVAKSNR	0.002	11	2 (2)	3	1.70823e+06
Tt_030980-T1		caltractin-like isoform X1	271	30.8	F:GO:0005509	F:calcium ion binding			MSNFRKVSGSTGPKKRSGGKQELTEEQKQDIKEAFNLFDPENSGTIDTKELKFALRALGFEPKKEEIKKMIAEVDKGGIGKIAFDDFLNVMSTRMAEKDINEEIMKAFQLFDDDNTGKISFKNLKRVAKELGENLTDEELQLKYIAKSRNGSTKMFKNTIKYSLCSKETTAIEMFKRKDVHFDPVDKRMCKDIRSAASKYTSKLRENQKKRAERLEAYGSVKSGPATLAKEKVQKAAEAQRAAHSEKERKKARKRALETLVSKKRKVAKID	0	6	1 (1)	1
Tt_031847-T1		26S proteasome regulatory subunit 7	417	46.6	C:GO:0000502; F:GO:0005524; C:GO:0005737; F:GO:0008233; F:GO:0036402; P:GO:1901800	C:proteasome complex; F:ATP binding; C:cytoplasm; F:peptidase activity; F:proteasome-activating ATPase activity; P:positive regulation of proteasomal protein catabolic process	EC:3.6.1.3; EC:3.6.1.15	Adenosinetriphosphatase; Nucleoside-triphosphate phosphatase	MPDYLGNDMRKTKKDDKEEEEKEIKVLDEGDIALLKSYGAGQYSKAVKQVEDDTQAILKRVNELTGIKESDTGLAPPALWDLAADKQTLQNEQPLQVARCTKIINADSDDPKYIINVKQFAKFVVDLADSVAPTDIEEGMRVGVDRNKYQIHIPLPPKIDPTVTMMQVEEKPDVTYSDVGGCKEQIEKLREVVEMPLLHPERFVKLGIEPPKGVLLFGPPGTGKTLCARAVANRTDACFIRVIGSELVQKYVGEVSENSVSFLKKGARFDDGAGGDNEVQRTMLELINQLDGFDPRGNIKVLMATNRPDILDPALMRPGRLDRKVEFSLPDLQGRTHIFKIHARSMSVERDIRFELLARLCPNSTGAEIRSVCTEAGMFAIRARRKVATEKDFLEAINK…	0	10	2 (2)	3	322459
Tt_031897-T1		MAGUK p55 subfamily member 5-like isoform X3	965	109.1	P:GO:0009987	P:cellular process			MTKLSQELNECPHSSPELNGVIENNPIYVTSVPELQSATLERIKQNRVNNNKHLTADFITREEPLGDEQYPSANGHCQPVSSEQELEEQDQEQEGHDQELELKQEILESRTAVPESRKPQVAIFFSKDVRQPSTVPQTDSNSFEKASILGKEKSSTVTATIKPEEAKDMMEVERGPHREMAVDVPDSFVAVRKTPPRYPPPKPSIISTDSLNFKKGVPPEPPTRTTSFVPGKAKQQDLIRNDSRSLSNVVDAQPSLHGVELDPDSVKTGNVVYKPHVNGRTLSPQTSRLQVNGVTEVSVGKNGEDERLERIRKYQEDIRKRKEVEERLACEEEFLRSSLRGSKKLQALESKPQPLPRTGIINTAFQLEEGDTGTLPIGHQGKGLVGDVVDLAGDQEVPE…	0.04	1	1 (1)	2	3.77886e+06
Tt_031997-T1	eIF5	eukaryotic translation initiation factor 5-like	443	50.1	F:GO:0003743; P:GO:0006413	F:translation initiation factor activity; P:translational initiation			MGSVNVNRSLSDQFYRYKMPKIIAKVEGKGNGIKTVIVNMVEIAKALNRPPTYPTKYFGCELGAQTQFDVKNERYIVNGSHEAAKLQDILDGFIRRFVLCPSCDNPETTLGVLQKKGLIMVKCIACGYSGTLDSAHKLITFILKNPPHQSPGATGSSVQSGKKSKRKSKEDSSGKHQENGEDGDSPQHDSDPDVCENTAVNGDDVDWSVDTDDFAVAKRMEDLTAGAKGLMLNNDLEKTQQERVNIFYEFVKKHKDNNTLDSTIKEILAEAERLDIKDKAPLVFCELLFNENIIHQIKLHRMLFLRFTHENHKAQKYLLGGLEQVVKLHKDSLMNKIPHILKTFYDTDILEEEVLIDWDKKVSKKYVSKEIAQEIHEKAKPFIKWLQEAEEEESSSEEE…	0.013	2	1 (1)	2
Tt_032389-T1	RARS	arginine--tRNA cytoplasmic	669	76.3	F:GO:0004814; F:GO:0005524; C:GO:0005737; P:GO:0006420	F:arginine-tRNA ligase activity; F:ATP binding; C:cytoplasm; P:arginyl-tRNA aminoacylation	EC:6.1.1.19	Arginine--tRNA ligase	MDMETVVKLYTTKAEKAEEEIQLLTSELEELKKFKNGITFPSDMECSPELEKLRVENMKLRYRIEILKKSLEEEESRAGKFMNSPRELILGIFRQAVTEAFPEIEDPPVPVLPSNQEKFGDYQCNSAMPIAQLLKAKGRKCSPQEVAKEIVAKLPGSKILDRVEIAGPGFINATLNREYVCCQVTKLLQNGVKPPNVGPKKRVVVDFSAPNIAKEMHVGHLRSTIIGESISRLLEFVGHEVVRLNHIGDWGTQFGMLIAHLQDKFPNFDKESPPIADLQAFYKDSKIRFDTDPEFKKKAYSCVVKLQNHEPSFITAWKMICDVSRKEFSKIYEKLDITITERGESFYQELMNEVVEELEAKGFLEEDEGRMVMFAEGQSVPLTVVKSDGGYTYDTSDLA…	0	4	2 (2)	4	1.5873e+07
Tt_033957-T1		uncharacterized protein LOC111086422 isoform X3	642	73.9					MSLKVFWKCSYDYVEIQEGEKQNQNSVTRHCGNWTDKLKLLRFLSRTNQIMLTFHSDISNSGRGFQAEVRLGPEENEAVASQCDSQMFRLLNNTCYLLISYPEVKWSKANDICIESGAILAIAPSLQQKMILQSLVESVDEVRSNVLYWVGGVKEAGLKNWYWIDGQLIDEMIIQLKKYKSRYQVKTSNCLGIRREIRGNDSHHYWLSETCNTPGKFICMKNATSTQGIISSPNFPSQYFNNFHYIYTIVGPPFSRIYVTLRHLDLELQEQCLYDYVSLRSDIESPEKKFCGRHRTDLSWFEFISSNNIAILTFHSDYAVSGSGFEAAWKAIDVSICQKRQKINVENKNNIFSPHYPLGLLSNIHCQTRLETNLKRQILLTFNDFDIGERNNKGLCEND…	0.037	1	1 (1)	1	6773673
Tt_033961-T1	Pepck	phosphoenolpyruvate cytosolic [GTP]-like	648	72.4	F:GO:0004613; F:GO:0005525; P:GO:0006094; F:GO:0016301; P:GO:0016310	F:phosphoenolpyruvate carboxykinase (GTP) activity; F:GTP binding; P:gluconeogenesis; F:kinase activity; P:phosphorylation	EC:4.1.1.32	Phosphoenolpyruvate carboxykinase (GTP)	MMPPILCWIARYGKVLAKSVDTPLTLGKWVPVTSRFFSVVHGDISRLKSNVRDFVEEKAKLCQPDNIHICDGSEAENDYLLHMMQKQGMIIQLKKYENNWLARTDPADVARVESLTFISTPNKHDTVPVTKEGVKGTLGNWMSPADQEKAFSERYPGCMKGRTMYVIPFSMGPIGSPIAKIGIQLTDSAYVVCCMRIMTRMGSAVLKTLGEQSFIKCLHSVGQPLPMKSPPINNWPCNPSKTIISHIPANNEICSFGSGYGGNSLLGKKCFALRLGSILAKREGWLAEHMLILGITNPQGEKKYVAAAFPSACGKTNLAMMTPTLPGYKVECVGDDIAWMKFDDQGHLRAINPEYGFFGVAPGTSMKTNLNAMLTVQKNTIFTNVAERSDGGFFWEGME…	0	8	4 (3)	9	949455
Tt_034367-T1		tubulin beta chain-like	247	27.4	F:GO:0003924; F:GO:0005200; F:GO:0005525; C:GO:0005737; C:GO:0005874; P:GO:0007010; P:GO:0007017	F:GTPase activity; F:structural constituent of cytoskeleton; F:GTP binding; C:cytoplasm; C:microtubule; P:cytoskeleton organization; P:microtubule-based process	EC:3.6.1.15	Nucleoside-triphosphate phosphatase	MREIVHVQAGQCGNQIGAKFWEVISDEHGIDPTGTYHGDTDLQLERINVYYNEASGGKYVPRAILLDLEPGTMDSVRSGPFGQLFRPDNFIFGQSGAGNNWAKGHYTEGAELVDTVLDVVRKESESCDCLQGFQLAHSLGGGTGSGMGTLLISKIREEYPDRIMNTFSVLPSPKVSDTVVEPYNATLSVHQLVENTDETYCIDNEALYDICFHEGYKSGFRPNLFLNVQIQRGKMEQHSLAIREGKD	0	31	5 (1)	6
Tt_035573-T1		collagen alpha-5(IV) chain-	966	95.2	C:GO:0005581	C:collagen trimer			MKFKKVLFFQFTALFFLLLLIEYSEAAACKGCHVQPCICVGEKGIPGLIGLMGVPGLPGPPGRMGGEGPYGPHGTRGERGEHGGLGPKGIRGEQGVPGFIGSAGVPGLPGDEGMKGKQGFPGCNGTDGAPGQPGIPGIPGVRGPPGPVGDYGLRGDPGEGGINSIGVKGEAGGAGRPGPVGRRGLTGLIGEKGVQGPLGAPGVKGDQGEPGPKGPTGEGREGSKGPKGNRGYPGDVGSQGPTGRRTPDPNIKHFRQGQKGVAGEKGEKGAKGEQGYDGISGEVGLLGADGPKGEKGERGDPGHRGKRGKDGPLGPSGDKGQKGQPGLTGEDGVPGVKGQSGENGRFGRHGPQGPPGPPGPIVTVGEPLPGPQGSQGPVGERGETGNPGRPGNVGPVGYR…	0	4	3 (3)	4	763936
Tt_035575-T1		collagen alpha-2(IV) chain-like	1789	175.4	F:GO:0005201; C:GO:0005581	F:extracellular matrix structural constituent; C:collagen trimer			MERTIRRVPSISVYTWVLVLFVALFQVSQIEAQYRELYDTRYESHSRGSPVVCGNCTVSGCKCIGEKGSRGPPGPVGPRGEQGLQGFPGMEGLPGEKGDKGDAGPPGPRGPKGDRGKMGMPGLPGINGIPGLPGSAGSRGLPGLDGCNGTDGSPGSPGATGHPGPRGFSGPPGPKGLKGEPAIGPPGLKGQKGEPGRDGIEGPPGPPGYDGIQGLPGDPGPQGLKGIKGDRGQPGMKGNMGVGFQGMKGQPGSRGFSGPPGPAGECDNSYLEGRNHTSTGPPGLPGDVGMKGEKGERGDRGFDGIPGPQGKTGDIGMKGEKGLPGQPGPRGKDGFPGATGPAGYKGDRGESGLPGLNGLPGMKGDPGRPGESGPRGIPGPPGLPGGGEGIAGPPGPPGP…	0	1	2 (2)	10	3.01593e+06
Tt_036295-T1		60S ribosomal L10a	249	28.4	P:GO:0000470; F:GO:0003723; F:GO:0003735; P:GO:0006412; C:GO:0022625	P:maturation of LSU-rRNA; F:RNA binding; F:structural constituent of ribosome; P:translation; C:cytosolic large ribosomal subunit			MRSKFLSYLIYAFVLRHVFKSFGQWLWQGKEKMSSKVNRDTIYECVNAVVENSMKKQRKFVETVELQIALKNYDPQKDKRFSGTVKLKHIPKPKYSVCVLGDQQHCDEAKANGIPCMDSEALKKLNKNKKLVKKLAKKYDAFLASESLIKQIPRLLGPGLNKAGKFPTLLAHGESMVAKIDEVKATIKFQMKKVLCLAVAVGHVKMSDDELAQNINLAINFLVSLLKKNWQNIRSLHIKSTMGPPQRLY	0.006	3	1 (1)	4	1.00492e+06
Tt_036310-T1	P58IPK	dnaJ homolog subfamily C member 3-like isoform X1	508	58	C:GO:0005783; P:GO:0034975; F:GO:0051087; F:GO:0051787	C:endoplasmic reticulum; P:protein folding in endoplasmic reticulum; F:chaperone binding; F:misfolded protein binding			MGSGKNYSPNIYRIFSSLWVFVYAADNHLTVEFFTHLGANGNTAYVENHLHLGMQLLARGQYSDALSHYHAAVEGDPSNYLTYFKRATVYLALGKSKAALEDLNKVIELKSDFLAARLQRGNILLKQGRLEEAHIDYEWVLRLDPLNEEAQRAYRDLEPVKHDLELAYILIEDRDYIAAIDVLTRLLQVCPWDGKLREMRAGCYEALNDLVNAIGDLRSATKMRSDNTEGYLKLSQLHYKLGEVDESLMVIRECLKLDPDHKQCFIHYKKVKKLAAQLRTMQDSISQNDYTSCVEKANAALKTEPEMLHIVQHIKGRMCHCLNKGGQPSEAISVCSEAVKLNAEDVNALCDRADAYILNEDYDKAKEDFQHAVNIDEHLQRAKEGLEKTQKLVKQAKKR…	0.002	5	2 (2)	3	423558
Tt_036339-T1		luc7 3	427	50.9					MALASAKALLDELMGRDRNLPPTESKRDSQWNKDASWNNPEVCKYFLVKFCPNELFVNTKADLGICSKIHDERIRKEYEQSDRFQKMGYEDDFIKFCQGMLSDVERRIQRARKRLALGHQESGVASMPLSKNSEEKIVVLTDRINELLIQVEELGCEGKVEEAQGIMKLVDQLKEERETLRKGSEPSHWLQQTAEIAAAQEKQMEVCEVCGAFLIVGDAQQRVDDHLMGKQHVGYARLKSAVEEILQQRVKEREDRENQIEKERLERRRRQEEEERKREKEREERRRTLEEEEEERRWKEKERERYRHRSRSLDRGRRRSCERRSRSRDHRHSRSSKEKSKHERANKERSKQRSRSRSRESRHSRRSHSRSREKKNDSKHQDKESKDKRKERSKDSDYH…	0.009	2	1 (1)	2	97743.3
Tt_036837-T1		heterogeneous nuclear ribonucleo A2 B1 homolog	269	29.4					MVSSDNDMEPEQYCKLFIGGLDYRTTEESLKAHFEQWGEIVDCVVMRDPNTKKSRGFGFITYKKAHMVDDAQAARPHKVDGREVEPKRAVPREDCGKPEAQATVKRIFIGGLKEDVEEDDLRDHFGQYGNIVNVNIVTEKSTGKKRGFAFVEFDDYDCVDKIVLKKHHILKGRKTEVKKALSKQELESARMRGSSSRGSSGGGRNSSYGGGRGERGDYGGSSYGRGQTMRDDAYGGQAFGGGFGSQGMGSYSGGGSGSFGQGKILNTSF	0	26	6 (1)	18
Tt_036995-T1		LIM and SH3 domain -like isoform X1	309	34.9	F:GO:0046872	F:metal ion binding			MSGKRCARCEKTVYPLEELKCLDKIWHKGCFKCQECGMTLNMKTYKGFNKLPYCNAHVPHAKHTEVADTPEIRRIAENTKIQSNVKYHEEFEKQKGKFTQVADDPETLRIRNTHKIISNVAYHGELMKKEEMEQKRHLVPEKNGDPQTVPASSAFPPERSHPRSSRGVAYETSTKREVQDSPYSSKLQSTVIYTSEEGPVQSAPSRKIGSIADYDPIHENYGSIASGFRPDTTHTTTHFYGGVSPSQQSHGRVFRAMYDYTASDVDEVTFMDGDLIINCTPIDEGWMTGTVQRTGQTGMLPANYVELVN	0	19	7 (1)	10	114406
Tt_037154-T1		serine mitochondrial-like	512	56.8					MALSNIIHHQIHMILSKKVATFKTIEKLLPRVVYPVVSFATSSKWCQHKEWSGNELLSKDDPEIWELVQEEKRRQKNGLELIASENFASRACLEALGSCLNNKYSEGYPGQRYYGGTEVIDKIELLCQKRALEAFDLDPEKWGVNVQPYSGSPANFAAYTGLLKPHDRLMGLDLPDGGHLTHGYMSDQKRVSATSIFFESIGYKLNPETGLIDYEKLSQLARLVRPKLIIAGTTAYSRLLDYKRFREICDDVKAVLLADMSHISGLVAAQVIPSPFEYADVVTTTTHKTLRGARSGLIFYRRGVKGKDKKGRDIMYDYENPIDFAVFPSLQGGPHNHAIAAVAVALKQATTPAFKEYQQQVLKNAKTMAKALIDRGYTLVSGGTDNHLLLVDLRPKGLD…	0	6	3 (3)	4	5.17969e+06
Tt_037166-T1		U4 U6 small nuclear ribonucleo Prp3 isoform X2	648	74.5	P:GO:0000398; C:GO:0046540	P:mRNA splicing, via spliceosome; C:U4/U6 x U5 tri-snRNP complex			MALSRRDLEELKPWIDKTVQKFLGFSEPTLVTAAINCLSSGYDKRKTTDKLSSLLDESKAGKLAEKLFETLDDLKVKTKSRKRHKDEIESADPKKVKIKEEETPIPAPGQPSPGQLTAIQIKEMMANAQRMIEERKKALSHLKLQDAIAKVNAQVSPIPGTEQSELIPPEALKIPLVALKQHVPSFEPDNKTKIADLTARIQNRLANQPNLLNLAIGDRPTPLILNDEGRTVDITGKEVQLVHRMPTLKANIRAQKREQFKLSQEKVTEDITEQNFFDPRVSIKSSHRPKRGFKFHEKGKFEHLAQRLRTKSQLEKLQTEIAHAAKKTGISSATKLALITPKKEIKEGEIPDLEWWDRYIIKGESYESIERSEKLSDEIFEGITNFVEHPTQMKAPTDP…	0.009	2	1 (1)	2	56590.8
Tt_037168-T1		splicing factor 3A subunit 1-like	826	92.1	F:GO:0003723; P:GO:0006396	F:RNA binding; P:RNA processing			MPPIAEVQRETEDAVVQEQKDVAPSKPTIGIIYPPPELRNIVDKTASFVARNGPEFEARIRQNEINNQKFNFLNPGDPYHAYYQHKVKEFKEGKGAPEPVPATPLKPTPATPAPKPEAVKAPEQAVVPKEPPPEYEFWADPPSISAFDLDVVKLTAQFVARNGRQFLTNLMNREQRNYQFDFLRPQHSLFNYFTKLLEQYTKILIPHKSLMAKLKNEAESPKSILEQVRYRVEWTKHQEEQKRREEEEAERERVQYAQIDWHDFVVVETVDYQPNEQGLFPPPTTPDEVGKRVLAQERGEEGEEVEMEVESEDEDEGGEKKSEREKETPTVTSKPGIDNTQVQDMEEESSSEDESEDRPQKPPSPPPQPPKEAPPLPPPLPPQPGHVVVRKDYDPKSAK…	0	4	3 (3)	4	412227
Tt_037227-T1	kuz	disintegrin and metallo ase domain-containing 10-like	559	63.7	F:GO:0008237; C:GO:0016020	F:metallopeptidase activity; C:membrane			MKQTGTFLTQLCICLTFFTSQNANQLNEYIQNYESLSYNPEEVHKSHLRAKRSVHSFFVPVNFHAYGRHFNLRLKRETGVFSPDIVFDTSNGFNEKLDTSHLYNGFLLGEPKTAVYGSLREGVFEGKIHTSNETFYIERTHRYFKNNISPFHSIIYSANDVIDPFASKRKGHAVGCGITEKVLQWMQDVSNSAVPETDESTSISDLERNQENERTKRFEEQSYHNIYTREIQWRSPPRSQSTITPNRRACSLYIQTDSFLWDHVKRHESTDTKVKEEIISLIAQHVNAVNRIYEDTNFNGYTGIKFVVQRVKINDSSECDTPMKRGSNPYCIPNIDVSNFLNLNSQTNHDEFCLAYVFTYRDFSGGTLGLAWVASASGASGGICEKYKSYTENIGGRQV…	0	3	1 (1)	1
Tt_037483-T1		coagulogen type II	202	22.7	C:GO:0005576; P:GO:0042381	C:extracellular region; P:hemolymph coagulation			MGKVQLATLVLFGALTYVVSDINAPLCLCDEPLNVGVIHGRKPVITKGVQDHIDNVVKEVLQTNETVEELEDEDEHVLGRKKNSMIYLIKLFNDCGLQKCRFGPQLDRCLPSSPVPTSDVCEKKPKKCIPRFGYTADGEFRIIVQASAVNFEQCVWEHKCGECTNQDECTQKLKTIRLLTYHLESQLFYCEDFPSCCGCPCT	0.013	3	1 (1)	2	571233
Tt_037486-T1		coagulogen-like isoform X2	198	22.9	C:GO:0005576; P:GO:0042381	C:extracellular region; P:hemolymph coagulation			MSTPLHSLLILLSLLQLFYVISADINQPECLCEEPLPIGLQGRKIPKTYINFEIQRKIDREIERLQRNLGKEKRSLNPLESCGHHNCFVSPEEDHCYSSALFYGDDLFQCQVAQERCEPVFGYTVDGNFRIIVQSQQNDLQQCVWQFKCHNVSNSNCMDTGVSCSHQRRAVSLLSYNLEFETIQCEDFYQCCDCRCKP	0.002	5	1 (1)	2	586652
Tt_038402-T1	Fas1	fasciclin-1 isoform X2	587	67.4					MKFLLTLCLFCCWKVLTFAESIYEELENDPHFSRFVELANTDELVQVLLKKRRVTVFAPTDDVFARSRQFTPEDLKRLPTCHVVNMVVTKDIFPGSVYPISQENAPLYFNTKESSEGDEKEYFVNNAKIVEERDFTVADGRQKMYVIDEVLQPYTSREYHPHDAWEFLKNPSLYNIEEELSEMVSRIEEEKQENLFTKVGNHTYFIPVDQEHNADGSKFKRIDKADSQGHEKGVVLSKIVRGNIPVKNGVVHLIQDPLMIIDTSIQEFIQSESSGKLSEYMKLVEEALPEFHLELQSTEKKTVFAPTNEAILRLAPEKLANLKKNKTELTKLLRLHMVMKSVSTDDVWKGRIYDAITADKQRSMYFRAVGDRKNKTLTLEAGGVNATAVEADIGATNGI…	0.006	2	1 (1)	1	2.02397e+06
Tt_038733-T1	Atp5c1	ATP synthase subunit mitochondrial-like	326	35.9	C:GO:0000275; P:GO:0015986; F:GO:0016787; F:GO:0046933	C:mitochondrial proton-transporting ATP synthase complex, catalytic core F(1); P:ATP synthesis coupled proton transport; F:hydrolase activity; F:proton-transporting ATP synthase activity, rotational mechanism			MIEVDEVGGLKGVRFCGGKKILGFLIKALNFKSRMLPAAARFAIFTPTYGQVRGMATLKDIQLRLKSIRNIQKITQSMKMVSAAKYAKAERELKPARSYGQGAQAFYQQAEIKAEEDKPKTLVLAITSDRGLCGAVNSSVSKKVKALISQSASNSDIRVICLGDKSRTMLQRQYGKNIMMVFSEYGKKPPTFESATEVANAVLESDFDFDNGIIIYNTFKSVVSYNTSDVPIFTVNTIGSTDKLSIYDSIDAEVLQSFQEFSLASLIFFAMKESYCTEQSARMTAMDGATKNAGEMIDKLTLTFNRTRQAVITRELIEIISGAAAL	0	12	3 (3)	4	857863
Tt_039178-T1		natterin-3 isoform X1	91	9.8					MTTGFFQVLVNRHGSVMEWHSASNGTVPPGAIQGGRTNSGEPLFIGRAHQNGSVTVGKVQPSHGVLYVSYGGKEIPHRSYEVLIVKTVALR	0.009	12	1 (1)	1
Tt_040055-T1		peptidyl-prolyl cis-trans isomerase dodo	164	18.7	P:GO:0000413; F:GO:0003755	P:protein peptidyl-prolyl isomerization; F:peptidyl-prolyl cis-trans isomerase activity	EC:5.2.1.8	Peptidylprolyl isomerase	MKMADEELPKGWEKRMSRSTGQPYYLNMFTKESQWERPTKPAEPPPPTSGDHLEQVRCSHLLVKHRESRRPSSWREENITRSKDDAMELIKDYREQIMSGKATFEELASKFSDCSSAKRGGDLGVFGRGAMQKPFEDASFALKVGELSQPVYTDSGIHIILRTA	0.002	12	1 (1)	1
Tt_040284-T1		eukaryotic translation initiation factor 1	113	12.6	F:GO:0003743; P:GO:0006413; C:GO:0016282; F:GO:0043024	F:translation initiation factor activity; P:translational initiation; C:eukaryotic 43S preinitiation complex; F:ribosomal small subunit binding			MSASIQNLKTFDPFADAIRADEQSGVQDGLIHIRIQQRSGRKTLTTVQGISDDYDKKKIVKACKKEFACNGTVVEHPEYGEVIQLQGDQRNNICQFLTKVGIAKPDQLKVHGF	0	22	2 (2)	7	1.57613e+06
Tt_040503-T1	Synd	kinase C and casein kinase substrate in neurons 1-like isoform X3	361	42.5					MSHHSDDGVLIVSSDSFWEPGNYKRTTKRIEDGFRLSNELIQLIQERSEIEKSYGKSIRAWAKKWNDIIEKGPEYGTTEAAWKGVLVEADRRCEMHIRVKDKLQNEVIQQIKQWQKDNFHKSMMQLKEKKEMDDAFKKAQKPWAKLLAKVNKAKSDYHTACKNEKSAQNQERNANADTSLSPDQVKKMQDRVAKCKDDVQRTKERYEQALREINDYNAKYMEDMTVVFDKCQEFEQKRLDFFKETLFGIHACLNISEDPELPQIYEEYKHTIQNADAIKDLKWWSHNHGIGMAMNWPQFEEYSEEFRDITGKTKKGVILEGGIMLVNQQKLKEDFPVIMILLFISVDRSSCIWWWLSCPVS	0.002	3	1 (1)	1
Tt_040546-T1		probable splicing arginine serine-rich 6 isoform X1	293	34.3					MSGRSHLFVGRLPIDVRERDVENVFEKYGRLVRCDVKYGTGTAYAFVDYDDRRDAEDALKYENGREIRGQSIVVEWARGPSYRPSIHMMKSGGGRSRSTYDQCYHCQRSGHWARDCPKLERDRYYPRRRRSRSHSRRERSYSRSRSRDNRSRRRSRSRSGENSKRYRSKTRSRTPSHSRSNSREQDGEKRNNSERDYRSKSRSPSKSHSPSPENNREKSPSPSEENSQEDKKVSNRGEEKEENDWNSRDESRSRSRSRSASKSPIVSQNGSIDRDHSDGDVGNEHLDRQSSSH	0.002	9	2 (2)	2
Tt_040825-T1	SRBD1	S1 RNA-binding domain-containing 1-like	387	42.6	F:GO:0003676; P:GO:0006139	F:nucleic acid binding; P:nucleobase-containing compound metabolic process			CETIALGNGTACRETEEFLSSLIQNRVFAPLDVMYCIVNESGVSIYSVTKDAEMEFSSLDPNLRSAVAIARRLQDPLLEYVKVEPKHLGIGQYQHDITEALLKSALDEVVVECVSFVGVDINTCSEIVLRKVSGLSTSKARNIIEWREKNGPFQNRQQLTLVKGFGPKSFEQCAGFVKIMPQTSIDSCLKEEPEAVGTSKKRKLAGGTKKCNKKSKVDVMCEPNPLDSTVIHPESYAETERFLVSISATKDEIGQNNLVTKVEQSLKNKGINCLAEEIGVPVPTMQLITEALKQPPEYDIRSEFEKPVFRRGVMSLDQLSTGQVLTGRVKSVTHFGAFVDLGVGKDGMIHVSNLRNKNVALGDRVTVKVVNLDIKKGRIGLVLTQPC	0.009	2	1 (1)	2	2.539e+06
Tt_040829-T1	Manf	mesencephalic astrocyte-derived neurotrophic factor homolog	192	22.2	F:GO:0005509	F:calcium ion binding			MMGSNKPIDSCTNRPGERWFGTMKGSLVMFLLLALLGFAKGLREGECEVCIELLKRLEKSLDPGLKDKPAHIEEKFKEMCKDTKKAEHRFCYYIGGLEESATSIVSEMSKPMSWGLPAEKICERLKKKDAQMCELRYEKTIDLNNVELKKLRVRDLKKILSDWDEICEGCIEKTEFIKKIEELKPKYMRGEL	0.003	5	1 (1)	1
Tt_040954-T1		RNA-binding lark-like	258	30.1					MEVGSQVSDSEQMAPRTKIFVGRLPDDCNSTELQGLFEKYGTVTECDVIRKYGFVHMSSPEEADTAIKELNNYNLRGSTISVEPSTSKLHPEPGAPGRARTEGGGPLRRGGPRNGYGLRDYYMDRYYDYRYYDDYGRDLYYRPRPYPYVYDRRPPSPPTMSYRDEAYRRTMTSPRDSPYRRALPPPPPPPPPPRDDPYHRRLPPPPPPPPLDEDDMYDRHMRDRSSDYLYSRRSPTTMSSSSYRSSWYSSERRSPNMW	0.002	6	1 (1)	1
Tt_041613-T1	SMOC2	SPARC-related modular calcium-binding 1-like	529	61.7					MTLTFGSLVFIVLIFQLCQVWAQFLLLSSDNKKKCDIDCSKVNLVLVCATDGRTYQSICEIERAKCEGHPIELKHHGKCPASARCLAQRDIAEFQSKQDQSAVFKPQCKEDGSFMEVQCHQLSGYCWCVDDQGKPLPGSSVQYGHPKCNSLGRRTNRRRAFQRGRQRRVCSNTDRTTFNNNLVNIFKSEYKRLPSSLDVDSEDKQVIQWKFQQLDTNGDNILRRKEVRDLRRMAKKIIEPRPCAKTFTRHCDFDHDNTISMTEWTSCLMMDISHNREHQPWKELEFPIVQTEIKAAEPNPKEEVEEVQDCLTTRRRAQKNPDNNLYIPSCKKRNGLYKDIQCFKPKNKPATCWCVRPKNGKPIPRTTSHGGRPPCRKMRKMAKMFKGCRIRKKQKFLSE…	0.002	2	1 (1)	1	239992
Tt_041662-T1		uncharacterized protein LOC106478078	352	41					MPTFTLCLALSAWLCFCSDHVQVSSVSTRTQRLQNLPNQSSYSGYSTLEKEQLESQKDSAYGEFIKRNGPEPSSSYQQFYRTYYGTPEGLKNLKKTYGPIGLRKALDAHNIQEKLKEVRQANDHFLKIRSRATCKTPLPQVIRVKDYFSDSSKQYVPRCTILHRCSDQSGCCDEEQHKCGPMRVQEVALHFYTLQLKNRSTQIGIENAVEQLLFINHTECECQPINNKPRTKEDLHRFEPNSHERRPSDVQSSKCQECPVPFNKREYPDGRCSCDCFDHQKACLRIKRGRDPLVDIEKRCVLAGYCNMPDCEYGPYDPVHGICPKRPENYARKNHKKRSHSHYHRWVFFERD	0	4	1 (1)	2	1.32464e+06
Tt_041871-T1		cofilin actin-depolymerizing factor homolog	148	17	F:GO:0003779; C:GO:0015629; P:GO:0030042	F:actin binding; C:actin cytoskeleton; P:actin filament depolymerization			MSSGVSVASEAKTAYDEVKKDKKYRYIIYHIKDERVIDVEHKGPRSSTYENFIEKLQNYKSECRYCVFDFPLSVAVEGSQKSSPMTVDRLILMMWCPESSPIKHKMLYSSSYDALKKALVGIYKYVQACDFDEVSKDVVEDTLKRGGK	0.002	11	2 (2)	5	706486
Tt_042031-T1	PROSC	pyridoxal phosphate homeostasis -like isoform X1	249	27.7	F:GO:0030170	F:pyridoxal phosphate binding			MVDKIGDALNSVYARIREAKEKRTTGSAEDVRLVAASKTKSKEMIIAAYEWGQRHFGENYVQELVEKSNDPEVLEKCSEIKWHFIGHLQRNKVNKLVAVPNLYMVETVDSERLADVLNKAWEKLNSCQKLKVMVEVNTSGEDSKSGVDLEGASSLVHHVIDKCQNLEFTGLMTIGILDHDISSGPIPDFLRLVKCRQDICSHLGLDANKIELSMGMSGDFEHAIELGSTNVRVGTTIFGARNYPTKNTD	0.002	4	1 (1)	3	753168
Tt_042085-T1	SUCLG1	succinate-- ligase [ADP GDP-forming] subunit mitochondrial-like	303	31.7					MTCSNLMINKDTKVICQGFTGKQGTFHSQQALEYGTKLVAGVSPGKGGIKHLGIPVFDSVKEAVAETGATASVIYVPAPFAAKAIDEAVDAEVPLVVCITEGIPQLDMVRIKHRLLQQSKTRLIGPNCPGVIKPGECKIGIMPGHIHEKGKIAIVSRSGTLTYEAVHQTTQVGLGQTLCVGIGGDPFNGSNFRDCLEVFLNDPDTKGIILIGEIGGGAEERAAEYLMDHNKGSNSAKPVVSFIAGLTAPPGRRMGHAGAIIAGGKGGAKEKIEALKAADVIVTKSPAQMGAIMYQEMQKRGLA	0.002	9	2 (2)	3
Tt_042739-T1	RpL35A	60S ribosomal L35a-	133	15.3	F:GO:0003735; C:GO:0005840; P:GO:0006412	F:structural constituent of ribosome; C:ribosome; P:translation			MAETKAEKTNLVAPVKTKQALKPGRLYCKAIFVGYKRGLRNQHENTSLLKIDGVVSRKQTEFYIGKRCAFVYRAKNKTRVPGKKDHFTKLRAIWGRVTRPHGRSGVVRAKFKRNLPAKAMGRRIRIMLYPSRI	0	14	2 (2)	5	3.3687e+06
Tt_042767-T1		H ACA ribonucleo complex subunit 4	510	57.5	P:GO:0000495; F:GO:0003723; F:GO:0009982; P:GO:0031118; P:GO:0031120; C:GO:0031429; P:GO:1990481	P:box H/ACA snoRNA 3'-end processing; F:RNA binding; F:pseudouridine synthase activity; P:rRNA pseudouridine synthesis; P:snRNA pseudouridine synthesis; C:box H/ACA snoRNP complex; P:mRNA pseudouridine synthesis			MAESVLGSPKPKEKKKKKKHSLGDVQAEEDFHIEPSEKKGSLNTSQWPLLLKNFDKLNVRTNHYTPLPHGSSPLKRDIKDYISSGFLNLDKPANPSSHEVVAWIKRILRVEKTGHSGTLDPKVTGCLIVCIERATRLVKSQQGAGKEYVCIFRLHSAPESQQQVVKCLESLNGALFQRPPLISAVKRQLRVRTIYETKLLEYDQEKHMGIFWVSCEAGTYIRTLCVHLGLLLGVGGQMQELRRVRSGIQSEKEGLVTMHDVLDAQWLYDNHKDESYLRRVIRPVEGLLVSHKRVIMKDSAVNAVCYGAKIMLPGVLRFEDGIELNEEIVIVTTKGEAIALAIALMTTATIASCDHGVVAKIKRVIMERDQYPRKWGLGPTASVKKQMIKEGKLDKYGKP…	0.002	3	1 (1)	1
Tt_042815-T1		TPPP family CG45057-like	188	20.5					FVVWETAQTKGSFNMATSGSESPRSDEGGSFEEIFVAFAKFGDSKNAGDAITLSNSDKWFKQAKVIDGKKITTTDTGIYFKQVAKAKKTLNLNEYNQFLEKIARNKKMDVDEIKVKLSSCGAPGTSLKPTSSGTVVSRLTDHTKFTGSHKSRFDESGKGKGKEGRQDLVDGSGYVHGYKHAGTYDTSH	0.002	7	1 (1)	1
Tt_042940-T2	DNM2	dynamin isoform X3	801	90.8					MDNEGMQELIYTMNKLQDALSKAGVELAVDLPQIAVLGEQSAGKSSVLENLIGKEFLPRGTGVVTRRPLVIQLFYSPDKVESGIFNHQPNKVFEDFKEIRQEISEETDRETGKTRNVSAKPIILCIYSPNVLQDLTVVDLPGLTKVPVGDQPKDIAVQIQKMVKDFISQPNCLILAVTPATQDIANSVSLQLAREVDPEGERTIGVITKLDLMDEGTDAREILENRIFPLKRGYIGIVSRSQKDIDTNKDINVALQEESLFFKKHPNYKHLVHRMGTKYLQESLNKQLKTHIQERLPSVRSALQHQLIDLKKEYEKLKNIFGDADDAGKVRFMTSIVYDFADEFKKKLVGQTEAAGIRHVDEGAQINDAFYTDVARLLSMDLIPNDQELAVVIKNIHGY…	0.044	1	1 (1)	1
Tt_043060-T1		RNA-binding 12-like isoform X1	1244	136.1	F:GO:0003676; F:GO:0003723	F:nucleic acid binding; F:RNA binding			MSVIIRLQNLPWSANSLDIRRFFNGLSIPEGGVHIVGGEKGDAFIAFSTDEDARQAMERDGGRIREIKVKLLLSSRTEMQRVIEQARNQSLGIQPTVPQTQPKGSSKEKDNERKHTPDRAKSPDRRRDKERSPKDKERSRRSGRSHRSRSRSPRRSRDRERDRDQDRRSERQRRDDKSSDRLKPPDQASQPKDNDIRARNTGLSREQREPAFTPGGVPNGGMGISPQSRGMLFEEPTLMLENDHMHSGHPPFPPNYDQAGQVSHWGQNFPLEDTRDQWREERQGLLVPPGQFGGRPDPRGAPLVPHEKGYHVSGTPYRGRYLGNEVVPERHGVSFPDRRITHDENRRTGFDEQRGRGIEPLDRNPPHTGPSYEEHGTEPMETFVENLPHRFSGHPPHDD…	0.002	1	1 (1)	2
Tt_043228-T1		muscle-specific 20-like	186	20.6	F:GO:0003779; F:GO:0005516; P:GO:0031032	F:actin binding; F:calmodulin binding; P:actomyosin structure organization			MSGRGPAYGLSAQVANKLAGKRDPALEAEILQWIEAILGQKLPPGSFDDVLRDGVILCNLMNKLMPGCIQKINTSGGQFKMMENINRFQEAAKKWGVPEIDVFQTVDLWEKRNIGQVGQCLMALGRACYTHPEWKGPCLGPKPSEENKREFTEEQLRASEGMINLQYGTNKGANASGLNFGNTRHM	0.002	12	2 (2)	4	1.23383e+06
Tt_043306-T1	Clic	chloride intracellular channel exc-4-like	267	30.5					MSEGNYDAIDSNINDSESPDIPEIELIIRASTIDGRRKGACLFCQEYFMDLYLLAELKTISLKVTTVDMLKPPPDFRSNFDSTPPPILIDNGQAILDNEKIERYIMKNVPGGYNLFIQDKETAKVIENLFSKFKLVLTRGGDPTKRALLNQLSNINDHLGTRPGRFLTGDTMCCFDCELMPRLQHIRVAGKHFSDFEIPVDLTNLWQYMYHMYQLDAFTQSCPADQDIINHYKLQLQQLGHRSKKHEELETPTYTTSMPSNVNINGD	0.03	7	1 (1)	1
Tt_043433-T1	mbl	muscleblind 2a isoform X1	363	40.3					MMAMINNIKDSRWLQLEVCREYQRNKCTRPDTECKFAHPPANVEVQNGRVIACYDSIKGRCNREKPPCKYFHPPQHLKDQLLITGRNHLALKNAFLQQVPLQPVLPAPAVVNGAPTLLYTPLLQQLAQQQHYGGMSLLTNGTISKATTNPYLAALPTMASAASFAHYLNPSPIFGLMPADAMAAPLSIVPNPFVNPQKVSRTDRLEVCREFQRGNCKRVETECRFAHPPEHVTMDSTEGMVTVCMDFIKGRCTRDPCRYFHPPLHLQAQLKAAQCRANVAAMPHVVETLISKKRPRDPADDLILAFPGIAPYTKRPAMDKSGIPVFQPSTSAAYQQALAMHVQQPFVPVSLPVAGHSTGVPRF	0.008	4	1 (1)	5	1.39422e+06
Tt_043828-T1		uncharacterized protein LOC106475632	705	79.4					MATGKEDAISKMNKQLRSVTKGKDIKEEMALIMTPHTNWEQYLVPAPLSIALLGDLMLITSDTDFSLENAKPVDGFKYMRYPSSFRACLAQVSNSGWDAFNEAHKNMDQIRLHSANVPTYLEKTVNILMRGTNQDIENILPIPLRGIKEIADQCLHLAQCTETRFIHVMNLTAEILEACTSAKCSYEEDLRETKIALKIAEEHEKAVQEERAMAKDQLKDIKKEIKSAEKMFEDAMKSVPNGWELIGMSFVEGLSNGVKNVVTGMSSLFNKRENVKNEETKNPTKTKSNPSECTMDKATLKSIVKVCSKAEVIQSFAQMLQALTDDEDSLNEEQLRKGETVSYVIRYAGIIRKEIVTESISKMQIKAVEICDKMISICRDLKEMKKGIHVDQSKQIVER…	0.008	1	1 (1)	2	257719
Tt_043874-T1		collagen alpha-2(IV) chain-like	1790	175.7	F:GO:0005201; C:GO:0005581	F:extracellular matrix structural constituent; C:collagen trimer			MELKLQQFPGLLLCKWSILIVFLIFLIPEIQAQYGDRESRQLGGRFRGNQILCGNCSAPGCKCVGEKGSRGPPGSPGPAGERGLQGFPGMEGLPGEKGQKGEAGSRGPRGPKGDRGKMGIPGFPGINGIPGLPGVQGPRGPPGLDGCNGTDGTPGIPGEPGDIGPVGFPGDPGPKGTKGEPAIGPAGLKGQKGEPGRDGTVGPPGSPGIDGLPGQPGTSGPPGLKGDRGDRGLDGMKGNMGVGYTGMKGEPGLKGYPGPQGPPGVCPNTSEQIKPNETKIGPPGSPGERGMKGEKGERGERGYDGIPGPQGKHGDIGMKGEKGLPGPPGTRGKDGFPGPPGPDGFKGDIGESGLPGLNGLPGMKGEPGREGDSGPRGLRGPPGPPGGSEGVAGPPGPPG…	0	1	1 (1)	2	219233
Tt_043877-T1		collagen alpha-5(IV) chain-like	1814	180					MNKGFSKFQLRQQYRRYTGVYVQKYIVDSYTRESSTTLANRREFHEKARSGIAAIGGPVQGCVGKRSKLACEGCQIQPCICVGEKGIIGHPGLAGLQGPPGPPGFIGEEGSYGSKGPFGVRGNPGDDGPKGIRGEQGVPGFIGSSGIPGLPGEEGSRGEDGYPGCNGTDGKPGLPGAPGIPGLQGPPGPPGDYGLRGDPGEGGINSQGIKGEPGDDGYPGLVGERGLPGFPGLKGLLGPLGPPGVKGDPGESGPKGPEGESRRGSKGPKGDRGSPGDMGPQGTSGPDSETLIFIRGLKGKWGEKGEKGAKGELGLSGRPGDIGSPGVPGPKGERGERGDPGPRGKRGKDGLPGPAGEKGQKGQPGLTGEDGASGVKGPQGEDGRYGSQGLQGPPGPPGP…	0	1	2 (2)	5	352839
Tt_044045-T1	TSNARE1	syntaxin-12-like isoform X2	248	28.6	F:GO:0005484; P:GO:0006886; C:GO:0016020; C:GO:0016021; P:GO:0016192; P:GO:0061025	F:SNAP receptor activity; P:intracellular protein transport; C:membrane; C:integral component of membrane; P:vesicle-mediated transport; P:membrane fusion			MSFGNQGKYPNYGSTGLKDTSGGLNRGQEPSFNQLSDTISSNIFAINNNASALDRAQKQLGTKTDSSSFRDRIHATQQMANETVSNTTFCLKHLSELVEKGNKQQKLQLERLKNEFKDTVQRYSSLQKQVATKMKYTLVNVMQKPVHPTVEWGIEDDNEENQALLEEERQKMQKQKQLDSELEVEQALLEEREQRIREIESDMLDVNQIFRDLASMVHEQGEVISKRQITIIQLYTISLWYYCLIIKP	0.038	6	1 (1)	1
Tt_044407-T1		---NA---	660	74.7					MSVSWTQISNGMSGYGYQYKLCYYLGYGHQNKLDTDIKTSCVSMLDKRIKISCVSILDTDMKISWSHTSKQVVSRHQNKLGTDIEKSFVSVLDTNIITCCVIILNTDMKTSWSQTSHKLCQYLGHRRQNKLCQYLSHRHQNKLNTDVKPSCVRILDTDMKTRHQTYCVNILDTDIKTSCFGILNTDIKTSYVRILDTDIKASLIRTSEQVVLVSWIQTTKYVGHRHQNKLCQYLEHRYQNTLCEYLGHRHQNKMCQYFDTDTELSYTHTSEEVVSVSWSQASKEVVSVSLAQISKQLFILDTDIKTSCVGILDTDVKTSCVSILDTDMKRSSVVILDTDIKTTWVLSVSSTQTSLLFGHRHQNKLFQYLGPGHQNKLCQDLGHRHQNKLCQNNGHRHQM…	0.01	2	1 (1)	3	6.275e+06
Tt_044480-T1	RpS26	40S ribosomal S26-like	119	13.4	F:GO:0003735; C:GO:0005840; P:GO:0006412	F:structural constituent of ribosome; C:ribosome; P:translation			TSKRRNNGRSKHGRGHVKPVRCTNCARCVPKDKAIKKFVIRNIVEAAAVRDITDASVYDTYALPKLYAKLHYCVSCAIHSKIVRNRSREARKDRTPPPRFRPPLGDIGARPAAPRATVK	0	34	3 (3)	17	7.61463e+06
Tt_044683-T1		serine ase stubble-like	331	37.6					MQRKISYVKLAWIKYNIKFIFMNRFLFRGLNSREQQLYAVSRRLSAHGLSTELSKHSTNWLTLSCICASDVFGQTVQSLCGRQRVRNSRIVRGSDAYDGEFPWAVSIRFNKEHHCGGTILNERWILTAAHCVHLYTARHFVVRVGEFDLSEKENHQTEDINIQQIIVHPKYSDPKRYYNDIAILRLAKDITFSDYVRPVCLPEASSSYVNQEGTVVGWGFKEDPDAGGERAKRLQKVNVPVMDFTQCENWYHEAGKLVTLQNGQMCAGFRKGGQDSCQGDSGGPLLVKEGDKFVIIGVVSAGIGCARPLLPGLYTKVSSYLDWIEQYIKNV	0.002	3	1 (1)	1	381465
Tt_044861-T1		---NA---	91	10.5					MNQNLWRVRHASIISQKKLKKAEVGAIIKLDSFTFLTGWMALWNGLPSGVMEDVNIMEFKRSFISLYINDFTTISVKLNNQKIINNYTDTI	0.009	9	1 (1)	2	440302
Tt_045013-T1	RpL36	60S ribosomal L36-like	109	12.7	F:GO:0003735; C:GO:0005840; P:GO:0006412; C:GO:0016021	F:structural constituent of ribosome; C:ribosome; P:translation; C:integral component of membrane			MAPRYEMCVGLNKGHKVTKNVTKPRPSRRRGALTKHAKFIREIVREVCGFAPYEKRAMELLRVSKDKRALKFIKKRLGTHLRAKRKRDELSHVLTAQRKAAAQREKDHK	0	12	2 (2)	4	788488
Tt_045428-T1	DNAJA2	dnaJ homolog subfamily A member 2-like	344	38.3	F:GO:0005524; P:GO:0006457; P:GO:0009408; F:GO:0031072; F:GO:0046872; F:GO:0051082	F:ATP binding; P:protein folding; P:response to heat; F:heat shock protein binding; F:metal ion binding; F:unfolded protein binding			MADTKLYDLLGVSRNASDLEIKKAYRKLAKEFHPDKNPEKGEKFKEISYAYEVLSDQKKREIYDRHGIKGLQEGGMDGGFTSEDIFSHVFGGGLFGGMGRGSGRKKKSEDMVHPLKVSLENLYNGKTAKLQLSRNVICKTCDGCGGKPGALQSCQTCNGRGIKVTFRQLGPGMMQQTQTTCPDCGGEGERIKEKDRCKVCKGKKTVSEIKLLEVPVDKGMKDGQKIFFRGEGNQEPGVEAGALIIILQQQPHERFQREGNDLYMSHTVSLTEALCGFNLVIKHLDERDIVIKHPPGEVIEPASIKGVRGEGMPIYKDPFEKGNLYIKFDVQFPENHFTDESNLQ	0.023	3	1 (1)	1
Tt_045449-T1	CIAPIN1	anamorsin homolog	353	38.6	F:GO:0003824; C:GO:0005739; P:GO:0044237; F:GO:0051536	F:catalytic activity; C:mitochondrion; P:cellular metabolic process; F:iron-sulfur cluster binding			MHYVGELLKGCGRPLAFSANKFFNIKHQILLKFLYSPSIAIKNIKIGIKMNFTPSPGQKVLLLWGASVGEDILVDTVKSLREKVGQQGSVAVENIERLLVSCHAVSSFDVVLCGLPSPGAVTHPTEVLSEIARLLRPGGKLILREPVTTEDINSEYKIRSSAKLASALKLSGFIDIGEPREFPLPAAQLSELKRELEIEEGTVSLMEVCARKPNFEVGSTIKLNFAKKGRSKSDENTSKIWTLSADDTLDEDVELIDSDQLLDEEDLKKPDPESLKASCEGTKKRKACKNCTCGLAEKLEQEKEPITQSNASACGNCYLGDAFRCASCPYLGMPAFKPGEKIILNDRQLKADV	0.005	3	1 (1)	1
Tt_045689-T2	VPS4B	vacuolar sorting-associated 4B-like	437	48.9	F:GO:0005524; C:GO:0005634; P:GO:0007033; F:GO:0016887	F:ATP binding; C:nucleus; P:vacuole organization; F:ATPase activity	EC:3.6.1.3; EC:3.6.1.15	Adenosinetriphosphatase; Nucleoside-triphosphate phosphatase	MSGGALQKAIDLVTRATEEDRKKNYNEALKLYNHGVEYFLHAIKYEAQSERAKESIRVKCTQYLERAEKLKSYLKKAKEKKPVKAGENESKKEENNSDSEDDDPDKKKLLNQLEGAIVMEKPNVKWADVAGLEGAKEALKEAVILPIKFPHLFTGKRKPWKGILLFGPPGTGKSFLAKAVATEANNSTFFSVSSSHLVSKWLGESEKLVKNLFEMARQHKPSIIFIDEIDSLCSSRSDNESESARRIKTEFLVQMQGVGTDNDGILVLGATNIPWVLDAAIRRRFEKRIYIPLPEEMARLHIFKLHIGNTPNSLREDDFHILAKKTEGYSGADISVLVRDALMQPVRKVQTATHFRKVRGPSRDDPNIIVDDLLTPCSPGSPGAIEMSWMDVPGEKLLE…	0.014	3	1 (1)	1
Tt_045882-T1	Neb-cGP	Up-regulated during skeletal muscle growth 5	59	6.4	C:GO:0005753; C:GO:0016021	C:mitochondrial proton-transporting ATP synthase complex; C:integral component of membrane			MAGDAHVDKSQFKGLSKYFNSQTMKGRANVAKATYAGIALLTLYMVTGRKKKAEPTPKK	0	42	2 (2)	5	289184
Tt_046076-T4	EME1	crossover junction endonuclease EME1-like isoform X2	571	63.9	F:GO:0003677; F:GO:0004518; C:GO:0005634; P:GO:0006281; C:GO:0048476; P:GO:0090305	F:DNA binding; F:nuclease activity; C:nucleus; P:DNA repair; C:Holliday junction resolvase complex; P:nucleic acid phosphodiester bond hydrolysis			MSQDCFGTDINSEATGSDSEDSIPSLAERLKQRSEAQKHQIQECICLSDEEPCQNEKYIVFEGKESTLPSHGCETKIHKPEIFKESVHSFTRLKPLVEDSITKGYVESKVQEITYQVNSLSGLQKSGVTSVAKTCLPSLVENEMNIGAKEACQLRGHREVLVDLSISSDKKGERNIQNYEKRQMPGSELGKSAVYCLSSSCSSDELPDVGNSFPVSKNCMSVSQSQENNMASSTNNKTTKYNKRSSEVRRLAQLRREQRQKEREIRKCEKEKEKLCKEVEREIKKSSKPGESIKFLRAVVDKKLLEMPGAGNFLNSLQTADVRYSLEDQPVTSSITWFRDLTEHAVIGNEVLKTTHGELQDQVLLVPKLMNFAKMIQVSKQNRYGASSCGEPSLVNYIQ…	0.022	5	1 (1)	1	554392
Tt_046155-T1		uncharacterized protein LOC106457905	148	17.1					MLRASVTTIWPSDSKIERRWEVYCPLTFRILSHILEPVVEEMLVVNAELHHGRGYHRKRLEVSGIDLTAVWTIVSQCYYAVIYRWHTDDGRIKFQESSKRGPVGLVQLPPRQVVRVVSVKANLPQNDRKIITVKWVAVNSPRNVKESI	0.036	9	1 (1)	1	236404
Tt_046263-T1	MARS	methionine--tRNA cytoplasmic-like	947	108.5	P:GO:0006412; F:GO:0016874	P:translation; F:ligase activity			MKLNIILKNLCSLKTVIATRITDTQVDIVEIPSRASCSGFCTNFSTSSPVFRPPVLELPSSERLFSPNAICWYLFRQREFRDDTAFDLCTEEWLEWESNYLQPYVTTLLASFFENNKLNEQLFSTLMNHLQYLETFLTSTPHFPRSSGTSPGLGDVVVWSTVYPIITDEKLGAATVKQFSSLCRWFDEVGLNKSFKEAVQYVFDGKKPSACKETLIVKDPVLLNFALSTQRGKLVPKVINSSDVETNTSEVEDVISQEEIFVVFNNWLKGKSSMPKKSEEKVPVLPQEGERNILITSALPYVNNVPHLGNIIGAVLSADVFARYCRNRNYVTLYICGTDEYGTATETKALEEGVTPREICDKYHRLHKEIYQWFNISFDYFGRTTSDWQIRIAQDIFLK…	0.028	1	1 (1)	1	1.36923e+06
Tt_046594-T1	HSD17B10	3-hydroxyacyl- dehydrogenase type-2-like	260	27.4	F:GO:0016491; P:GO:0055114	F:oxidoreductase activity; P:oxidation-reduction process			MTTIRNVKGLVALVTGGASGLGQATVQRLVNQGARVVICDLPTSKGQDVAKTLGDSCAFAPTDVTSEEDVGKALDLVKDKFGKLDVAVNCAGIGVAFKIYNFKKDLPHSLEDFKKVLLVNCLGTFNVNRLALGLIGKNEPDSDGQRGVLINTASIAAFEGQTGQVAYSASKGAIVGMTLPIARDLAPQGIRCCTIAPGLFDTPLLAGLPEKVRTFLAKTVPFPSRLGNTEEFAHLVQFIVENPLVNGEVIRLDGALRMQP	0	8	1 (1)	4
Tt_046660-T1	RpL18A	60S ribosomal L18a-like	176	20.9	F:GO:0003735; C:GO:0005840; P:GO:0006412	F:structural constituent of ribosome; C:ribosome; P:translation			MKARGTLKEYKIIGRRIPSEKDQNPPLYRMRIFAPDKVTAKSRFWYFTSKLKKLKKMNGEIVAISEVYDKTPTKVKNFGIWLRYNSRSGIHNMYREYRDLTVASAVTQCYRDMGARHRAQACTIQIIRVEELPASKCRRPHMKQFHDSKIKFPLPSRINRKFHKPRFTTVRPDVKF	0	22	4 (4)	15	1.82363e+06
Tt_046771-T2	TSG101	tumor susceptibility gene 101 -like isoform X1	439	49					MPQQVNDSYLSQLLKKYHHQDSTKRDIQNAIHHYKNLIPKLDRFVFNDGTAKDLMCLAGTIPVPFKGNTYNIPIKIWLLDTHPVNSPMCYVTPTSDMKIKVSRNVDQNGRVYLPYLHEWNPNSSDLIGLIQVMIIVFGETPPVYSKPKVPETSTGYPPYPLASSGYMPMPGVVSNPSYPPYPTAANAGPQPSFPMPLTSEPSQYRPQATGYPSYPAYPPASNYPVYSTPSTVGYSSYPPVGSQSSMGYPSYPPSTVSAVTQQNAPGQANTGTISEEHIRASLLSAVEDKLKKRLREVIAQMQAEIQVLKKTQDDLNIGKSKLDDIISKLEQEKAELESNVCTLREKNNEMKEIISKMEDQDGVDIDDAVVTTAPLYKQLLNAFAEENATEDAIYFLGEA…	0.023	2	1 (1)	1
Tt_046939-T1	SmD3	small nuclear ribonucleo Sm D3-like	122	13.5	P:GO:0000387; C:GO:0005681	P:spliceosomal snRNP assembly; C:spliceosomal complex			MSIGVPIKVLHEAEGHIVTCETNTGEVYRGKLIEAEDNMNCQMSNITVTYRDGRVAQMENVYIRGSKVRFLILPDMLKNAPMFKKTGSRGAATAAGRGKSAILRAQAARGRGRARPIFQRRK	0	16	2 (2)	7	1.03461e+06
Tt_046949-T1		macrophage migration inhibitory factor	118	12.9					MPVFTLNTNLPKDKIPEDFLKKTAEVIQQSLGKPISYVIVHVNPDQLISFGGGNEPCASATLMSIGALGKQENKKHSAALYKHIEKTLGITSDKMYIHYINANKADVGYVGKTFDDLL	0.008	8	1 (1)	2	512567
Tt_047182-T1		cytoskeleton-associated 2-like	999	113.4					MAPSRNRGRSVISENKNFSKRSNCFRRITDNLGNRTMERNHLQASSEKNVSTRPLSAWEKRRMYSQQLYQKNKSCINQHVRNTLVLKNNQCASMTKESKYRNLDSTDEQKMKRNPSKHKINGSFTICGKADINDKNVHLDTNLSKTEAAELSSPNLSTLDTEDIYTGYPSNDNRSSSNSKKRRRTSTYEKNKVLVNSSEDSEVKMFPHELTSSAKKRQRLSTYEKKSQEWNVENSNKYQKNAFSCRNSKSSLKKQRSSIYDKETNDKSGKKKNITLKGSAQLETKKKAGIKSQRCSSKSQYVRMTPPKPGGGSGTLVGTSIIKRNLKPKMSGMHIPSANCTKIGSDLIKTETSIHLGSNMHIPLDPIPKNLPVKERLRVWKERKQQTEYNRLQNIQTQK…	0.034	1	1 (1)	2	351417
Tt_047211-T1	form3	FH2 domain-containing 1	1691	191	F:GO:0003779; P:GO:0016043; P:GO:0030036	F:actin binding; P:cellular component organization; P:actin cytoskeleton organization			MGHQHQEREIRLDLKDSALPGQASHPAEKQDDVSYENINEVFKAILLQVKSTPEEIIFHKLLRHFLHINNALTSVKEAIWEAAEILVHTAILVETKEEAENLLTCVKHLRNYSSAKNNSCLSNCLNIQNDKQKTNQRSVMVQCSFKDLQISTPLSQTSSVLYSSEPSTKRQANVKKEHLQLPTTDESDFSTAVSTSPSSSGRHTDSQSSITSAFIPVSSLHLPLSSSSSSLVPPSPPPPSLPPSKCSPLPPSLPSLNGPPPPPPPPLLCLSLLSPPQPLGIKPPPPPGMISMHQVTLPQQAIPKPKNKMVSLNWNKIPTQKVTGQNNLWVLVASNHETTSNTLDFEMMESLFCQKQNSASRKNNENIITCNEDVTDAPNHKKKESQEIILLDSKRNLNV…	0.034	0	1 (1)	1	158618
Tt_047657-T1		methionine aminopeptidase 2-like	486	54.6	C:GO:0005737; P:GO:0006508; F:GO:0046872; F:GO:0070006; P:GO:0070084	C:cytoplasm; P:proteolysis; F:metal ion binding; F:metalloaminopeptidase activity; P:protein initiator methionine removal	EC:3.4.11	Acting on peptide bonds (peptidases)	MFRINEVSITFTMAAVLRDHEAVAEKQNGENNDEIEESNEFVQDEIPSDVAVKKKKNKKKKKKNTAAEDGINEIVKLSGELKQIEIKEENKIEIENKNEEDGASKKKKKKKGKGAGHKQQTDPPSIPITELYADGNFPVGEEMEYPIPQDGRSAKDRYTNEEKKTIENMQQDVYKELRLAAEAHRQTRQHMQKVIKPGMKMIDICEQLENIARKLIGENGLQAGLAFPTGCSLNNCAAHYTPNAGDETVLQEDDVCKIDFGTHINGRIIDCAFTLAYNTKYDKLLEAVRDATNTGIKEAGIDVRLCDIGGAIQEVMESYEVELDGKNYPIKSIRNLNGHSIGPYRIHAGKTVPIVKGGEATRMEEGEFYAIETFGSTGKGYVHDDMEVSHYMKDYDVGH…	0.008	2	1 (1)	2
Tt_048166-T1		dihydrolipoyllysine-residue acetyltransferase component of pyruvate dehydrogenase mitochondrial	476	51.8	F:GO:0016746	F:transferase activity, transferring acyl groups			MFRTVRILKNGVSKFSPNNVLKVNFSRKCRPTSCKWICSNNLEISNADLTFTRRQIYNRSAWLTRLYSSSSNLPPHHKVALPALSPTMEMGTIVSWERKEGDQLNEGDLLAEIETDKATMGFETPEEGYLAKILVPVGSKDVPIGKLLCIIVENEDDIAAFKDYVDSGEPIKAPDAAPKPESKPAKAQPLSPPLQPAAPTIVTTSVAPQVQPSITPPGGRLFASPLAKKLATETGVNLSEVAGSGLGGRITSQDIQSFIPAAVRAPEAQVAQPPGADYVDIPLTNMRKVIARRLLESKQTIPHYYLTVDVDMEEVLKLRQELNDLLRKDDIKLYNNVDVSVAVSTDAGLITPIITGVEKKGLIAISTDMKTLAKKAREGKLQPHEFQGGTFTISNLGMY…	0	7	2 (2)	4	268852
Tt_048190-T1		plasma carcinolectin	121	13.7					MYNTVKILRILTFFVLTQADVRHQTACNTVGSLKGIVDSVTELVDLARERISTLEDVFSTTTLERTFSPLINDKQNRSFQKSLCVTQTTEQKPPLPEDCASIYKKNNETEPVVSTRFNHDS	0	44	6 (3)	102	1.92808e+06
Tt_048249-T1	RpL30	60S ribosomal L30	141	15.9					MVAQRKQKKTIESINARLALVMKSGKYVLGYKQTLKTLRQGKAKLVIIANNTPPLRKSEIEYYAMLAKTGVHHYSGNNIELGTGCGKYFRVCALSITDPGKISQYFAFINMLENHGHVRLHVVTDVLIWLYNTSEKSKPSC	0	29	5 (1)	11
Tt_048290-T1	RpL37	probable 60S ribosomal L37-A	99	11.5	F:GO:0003735; C:GO:0005840; P:GO:0006412; F:GO:0019843; F:GO:0046872	F:structural constituent of ribosome; C:ribosome; P:translation; F:rRNA binding; F:metal ion binding			MTKGTSSFGKRHNKTHTLCRRCGRSSYHIQKSRCAQCGYPDKKKRHYNWSVKGKRRNTTGTGRLRHLRKVWQRFRNGFKEGIKPKTVKQPASAHTTPSA	0.002	7	1 (1)	4	539421
Tt_048457-T1		X-linked retinitis pigmentosa GTPase regulator	1663	186.4					MTLFPLFELCKTLSVSRDDVTEVILSTYGEYGNRGILALVCNNGYLLLRQTSSITPKAVIKQIPWFKQSDKAIKVICFDSSASWLLVACADSSLYILPVLSYLGPAMKPSGLWRTDDLTEIKLQGQRGIPTSLCWWQTMCEKQIGIMGNEVGEICFINLKTRREIGGTYINTSVQSLHVLYNEKTSTSYLLISGTRKKHWQLLLEEKKSGFLWPGDSEAETKKEALSEKRTVFGGERSSDEKQLDPRPQHLSQYDDRVFLAPQHARGRQLLTVHNPSSNILQVYESYFESPLLFSYRLPSDCGNIILADKLLFLTLPDNLGENTPRHKLKILSCQLSEVSGEGAKKREAYEAEVQAFSFPGEIISSHKKSSSVTCTDNLVKQLSDLSCHYDFPDDVTVK…	0.04	0	1 (1)	1	366689
Tt_048516-T1		adapter molecule Crk-like	280	31.6					MAGSFDPYDKNSWFVGPMTRQEATDLLMAENEAGIFIVRNSSTIQGDLVLCVREDNKVSHYIINKIQQGDQTRFRIGDQMFPDIPSLLNFYKLHYLDTTPLIRPAERKVEKVRAKYDFTGSGDADDLPFKKGEILTIITKDEEQWWTARNSVGLTGSIPVPYVEKYDENQVDGQNCRSSSPSTAQSGSSQLSPNTRSSCERNRYNTPNIQRKLPALAKVKQARVPNAYDKTALKLEVGDVIKVTKMNINGQWEGELRGKTGHFPFTHVEFIDSENSEDES	0.003	4	1 (1)	4	989543
Tt_048603-T1		importin subunit beta-1-like isoform X2	893	98.8					MNLITVLEKTVSPDKNELEAAQQYLEQAAQTSLPEFLKSLSDILQHAGNSPVARMAAGLQLKNALTSKDSDIRVQYQQRWLQFPEDIKGYIKKNVLSSLGTETLRPSSAAQCVAYIAVAELPHGCWPELIHLLTQNITDPSSSEMMKEATLETIGYICQDIDPDVLVTQSNDILTAIVHGMRKDEPSDHVKLAATNALLNSLEFTKANFAKDSERHFIMQVVCEATQSSNTQVRVASLQCLVKIMSLYYQYMEHYMGPALFAITIEAMKTETDEVALQGIEFWSNVCDEEVDLAIEASEAEEQGRPPERTSRFYAKGALQYLVPILMQTLTKQEEHDDEDDWNPCKAAGVCLMLMATCCEDDVVPHVLPFVKENIVNPSWRYRDAAVMAFGCILEGPDP…	0.002	3	2 (2)	3	546425
Tt_048875-T1	NARS	asparagine--tRNA cytoplasmic	486	56	F:GO:0003676; F:GO:0004816; F:GO:0005524; P:GO:0006421	F:nucleic acid binding; F:asparagine-tRNA ligase activity; F:ATP binding; P:asparaginyl-tRNA aminoacylation	EC:6.1.1.22	Asparagine--tRNA ligase	MGDALVQDTSKLTVAGCIYTSEKVGSDEHGDGSEQKPFKTILKAMHHTGKEPFPSIYVDSKTGEQGWELASQSQIKKIKKIWVREQHKNAERERKEAEDAEKREKNLEEAKKIIIKPHPSLPDPFQIKIRDSKSYRDKRIKIYGWVHHLRRQGKVLMFIVLRDGTGFLQCVLTDSLCQTYNALILATEATVCVYGILKEVPDGKIAPGGHELQCDYWELIGESPSGGLENEINEESHVDVQLDQRHLMLRGETLSQIMRARSVIMHCFREHYFSRGYVEVTPPTLVQAQVEGGATLFKLDYFGQEAYLTQSSQLYLETVIPSLGDVFCIAQSYRAEVSRTRRHVAEFTHIEGECPFITFNELLDKLEDLIVDVVDRVLQSPVADIVYHFNPDFKPPKKP…	0.009	4	1 (1)	2
Tt_049316-T1	FIBCD1	plasma carcinolectin	152	17.8					METSGGGWTLIQRRGDFGKPVENFYRSWVEYKNGFGNLTQEFWSGNDVIFSLTNQDNMVLRVDLEDFEGSRRYAEFEVFLVRSEIELYKMSYKTYKGDAGNSLAPHHNMMFSTKDKDNDKYSGSCAHNHKGGWWYNSCHRCNLNGLYYTEDK	0	21	3 (1)	7	73528.3
Tt_049648-T1	C21orf33	ES1 mitochondrial-like	257	28					MNLLRTGISRYSFVSARFFSISYCALSSPKVAVVLSGSGVYDGSEIHEASAILVHLTRENAQPLVYAPDIDQLHVINHCKGEPMEGEKRNVMVESARIARGKIQPLKDLDADSHDALVFPGGFGVAKNLSTFAVDGDKCKVNPEVERIIKEFHAAKKPIGFCCIAPVLAARVLGKVELTLGQDKDDGSGKWPYTGATEAVKSWGAIHHNKNVNDAVVDRSNLIVTTPAFMYDTPFFHQIYDGIGEMIKSLLGLIRNK	0.003	4	1 (1)	2
Tt_049863-T1		3-oxoacyl-[acyl-carrier- ] reductase	247	26.5	F:GO:0016491; P:GO:0055114	F:oxidoreductase activity; P:oxidation-reduction process			GASSGVGAATALLFSRLGASLSLTGRKKENLEKIAKQCEEISPSKHQPLYISGDLTVEKETRLILEDTIKHFGKLNVLVNNAGIIETGTIENTSLEQYDKMFNINVRSVYHLTMLAVPYLVSSKGNIVNVSSVNGLRSFAGVLTYCMSKSAVDQFTRCVALELAPKQVRVNAVNPGVLTTGLQLRGGLTEEAFKQFIERSKTTHALGRPGEAEEVAAAIAFLASDEASFITGVTLPVDGGRHAMCPR	0	11	2 (2)	3	312921
Tt_049922-T1		Atrial natriuretic peptide receptor	166	18.9	F:GO:0004672; F:GO:0005524; P:GO:0006468	F:protein kinase activity; F:ATP binding; P:protein phosphorylation			MENNKTKSTLAAITEKADTNLALYKGQKVVVKRLQAQDFKLTREVLMELKQRRDTTHENLVRFIGLSLCSPYVAILTELCPRGSLQEMLLNKSINMDWTLKFSISTDIVEGMLVLHESQIVYHGNLRSSTCVIDSRFAVKLSNFGLRKLLTQTEVEDVSNLRKSDF	0.022	4	1 (1)	1
Tt_050041-T1		PEST proteolytic signal-containing nuclear -like	191	21.4	P:GO:0016567	P:protein ubiquitination			MPRLTVYVNIMTEKEVDPEGNLIGSDDLDSLPKIKPNTEPSRREDEQPSAIEAEKRKLGEEGDKSGEENSATKKQKISMGFTKSFNSAKILQTQDKKNPMAISIKLGTQKPKEPPQTLKKTSASVAEVFNQDSDDDEEMPPEAKMRMRNLGRDTPTSAGPNSYGKTRQGFCDMKKVFERQLKEKMEEISNK	0.002	10	1 (1)	3	922437
Tt_050151-T1		tyrosine- phosphatase Lar-like isoform X2	2027	228.3					MLPCVGAFSFFLFLIYSVSPPTSADDPPRIVIAPRDQTVVSGSVASFVCTAFGNPKPMIEWRKDNRRITTQRYTVQEMPNGSVLRIEPVRPERDKSVYECVAENGVGEPAKAAAELNVLPEDAIPLGFPQFTMHPTMQGVEKGRTTLLYCQAEGNPTPTIYWLKNMVPVNLDDPRLNIIQGTYLQISEAKEDDQGTYQCVAENSIGSGFSNLASLYVKVRRVPPYFSIPPEPAYEVMPGSSLNLTCVAVGSPMPYVKWRKGSFDLTPDNSLPVGKNVLHLENIRESANYTCVAASKLGNIETVTAVLVQALPRPPKDLRISDVTARSIRLSWSYDIGAENIKYYVIQYKPKQANQEYSEISGIVTTFYTVSDLVPYTEYEFHVIAVNAIGRGSPSTPAV…	0.008	0	1 (1)	1
Tt_050189-T1	bic	transcription factor BTF3 homolog 4-like	153	16.9					MNAEKLSKLQAQVRIGGKGTARRKKKVVHRTSTTDDKKLQSSLKKLSVNNIPGIEEVNMIKDDGTVLHFNNPKVQASLTANTFAITGHAEPKQITDMLPGILNQLGAESLTHLKRLADIQSSVGKNASLQYQVMKVNANICDILFRNFFFFSV	0.002	12	1 (1)	4
Tt_050310-T1	LIMD2	F-actin-methionine sulfoxide oxidase mical1-like	90	10.3					MEASSFKFHKNCFRCSHCNSMLRLDNYTINSRKFYCTPHFKQFFKSKGSYEDGFIDNSKKESNENGDASDYTDGDTPGVHQVTVNQEVAA	0	27	2 (1)	9	272485
Tt_050468-T1	Clc	clathrin light chain B-like isoform X2	226	26.6					MSGFDAFESDFNNENLPVEDPVAEFYAREQNELAGLEDDMNFQSTAKSYSQTESQQATADYENDFMEDGEADIFTFSEDSQIEINGPSEPEILLNSAYQTKPVIQEEPEKIQKWREDHQKMLKEKDEQEYLKKEEMHQTALKEIEEWYARYYEQIEKSKFNNRNAEMEYVNERDTEVPTGQEWDRISRMCDFNPKASRGTKDTSRMRSIILQLKQTPLIHKSGPKV	0.008	4	1 (1)	2
Tt_050766-T1		NADH dehydrogenase [ubiquinone] 1 alpha subcomplex subunit 7	106	12.1	C:GO:0005747; P:GO:0006120	C:mitochondrial respiratory chain complex I; P:mitochondrial electron transport, NADH to ubiquinone			MAVAHRDISPLLQKIRNFLLGRELKLALRFSDEMSTRSPPLPKLPGGPSHKLYQNYYVNRDGRREVNPPVVLVENMRRKVIGSAERKDRSLHRLELGKVTPGKQAS	0	12	1 (1)	2	200247
Tt_051017-T1		nucleolin 1-like isoform X1	185	20.4					MSEKKSSPKREGTVKVVSKEDSTATNKNDEVLADGNGTVDSPAAKKTKLVKDHTMKETAAAGKHFLGKEVLEESRSLTQAIRDTAKVTVKRLDTMTLTAKEGETLLKNLNHPRESSSTGKRKTRSQTRGDDQQSPSPESKKLKKETTGPSEKGKSDDEEEEVPDSKEGETESKKKMKLLKRQQTC	0.03	4	1 (1)	1
Tt_051309-T1	mRpL47	39S ribosomal mitochondrial	240	28.7					MASNVLIGPVYRSLRSVCTRRACIQEYKRSIQTTKSCKELMEFFDDPKNWGAQEVKSGRAWRKDDLRIKSNVDLHKLWYILLKERNMLRTVEHAAKSEWELFPSPERIDKVEESMKNLEEVIRERNRAYYVLETGETGERPSEIRIDPFGNEYKHQMEEHVIPKELNSDYNEDDVVEFSSDVIDFQRKLKEQTVRNQIKEHQRRRNHVQGLLKRYPNIDMEALREQYPDINIEAIQKKIA	0.034	5	1 (1)	1
Tt_051555-T1		dpy-30 homolog	136	14.9					MTYVVTEIHRIRPGRNISGNSKNSKIKFSQTEKTSDAHVVTENVAAGAVSSEDVQKIVAAEKEVGESQSKKPRVDLQNFPTRQYLDITVVPILLQGLSALAKERPPDPIEYLAAYLLKNKSQFEQGSILNGQSSSS	0.007	7	1 (1)	1
Tt_051712-T1	SRP54	signal recognition particle 54 kDa	502	55.3	F:GO:0003924; F:GO:0005525; C:GO:0005786; P:GO:0006614; F:GO:0008312	F:GTPase activity; F:GTP binding; C:signal recognition particle, endoplasmic reticulum targeting; P:SRP-dependent cotranslational protein targeting to membrane; F:7S RNA binding	EC:3.6.1.15	Nucleoside-triphosphate phosphatase	MVLADLGRKITSALRSLSNATIINKEVLDSMLKEICAALLEADVNIKLVKQLRENVRSVIDFEDMAGGLNKRRMIQSAVFKELVKLVDPGVKAYQPTKAKSNVIMFVGLQGSGKTTTCTKLAYYYQKKGWKTSLVCADTFRAGAFDQLKQNATKARIPFYGSYTEVDPVVIAQDGVEKFKNEGFEIIIVDTSGRHKQEDSLFEEMLQVSIAVSPDNIIFVMDASIGQACEAQARAFKEKVDVGAVIVTKLDGHAKGGGALSAVAATRSPIIFIGTGEHIDDFEPFKVKPFVSKLLGMGDIEGLIDKVNELKLDDNEELIEKLKQGEFTLRDMYEQFQNIMKMGPFSQIMGMIPGFSSDFMTKGNEQESMSRLKKLMTIMDSMNDQELDHREGAKLFSRQ…	0.002	2	1 (1)	2	774585
Tt_052149-T1	TTC9C	tetratricopeptide repeat 9C-like isoform X1	182	20.8					MAESLLDMDDKDLGITAPVYSQLSPETKLTEARRYKEEGNALFKEKNLRGAMGKYHRALLFIQGIQVQQNAASLMGLTSTEQPKVDQLPEPAKQEVAKIKVDCYNNLAILDIEPTNVKALYRKGKALYNIKDYDTALQVLQKAQEVDNGNDSGIKQCIRDCKQQLKNLLRKERDIYRRLFEK	0.002	6	1 (1)	2	240359
Tt_052173-T1	AGPS	alkyldihydroxyacetonephosphate peroxisomal-like	458	52					MAAERISTIYRHINGSNRIQDQTRDKHGKEISDVPKHRQEVVKWNGWGYKDSQFVRDLEQDIVSFTGTRYPLGNKKLPLFHLWAKTVLGISKEYFCKSCAEIKNEVLPTPLTNKDFLEDLKTVNISYTDDPQDRLFRSHGQTMREIFMLREGLFSRIPDLVMWPTSHDDVVQVVKMANKYNVVVIPFGGGTSVSGALECPGEERRMIVSLDTTQMNKILWVDKKNHTAHIEAGILGKDLESKLAEYGFCTGHEPDSSEFSTLGGWVATRASGMKKNIYGNIEDMLVHVRMVTSQGVVEKNCKVPRISSGPDIHHFILGSEGTLGVITEVTLKIHPLPEYKKYGSIIFPEFDAGVAYMREVAKQELKPASVRLLDNEQFIFGQALKPEAESLLTPFVDVM…	0.04	1	1 (1)	3	5.76059e+06
Tt_052369-T1		uncharacterized protein LOC106460170	3029	333.6					MATGTGREVCEAKECNTNSWIPGRQCVLAKLPTRIGREQFHSSFYEALSKLQDCKDKPVKEKAALLVVIWKSLGACASSLNEVSSVFQFLFSETSLVILSREWADVNPVLKERLQTVIKECSQSLCQLVDEAARLCGVLTMALHDPWGESLLRELLTSSEDNNCFTKDGMQPEGLLLKRIEQLSAVGCEDAALQLCKICLQCHQNSCETRSFVNATCYGPETSEQEIEGTFMDWLLRLLHRTGRLAELVRETMKYTCHDGVRLIRRVQQSSEPDALDLAEVLTNAFLVGDLLQSSTYCCTKELMVLWCDIQVEKDRELEEVFNAVKMLLVCYAATSAHFYLFVDILWEKYGPSLFPLYIELYVRGLTSDLNYLEAINIKGRTDEVKELQVHISSVYYKF…	0.041	0	1 (1)	1	237506
Tt_052990-T1		fibrillin-2 isoform X3	1918	209.6					MPVLLHHWLIFLLPYIDINECELFPNICSGGGLCVNSAGSYKCNCPPGLTLDSSGTKCIDLREETCFASYSKGRCLKHFEGLYKKMMCCCSLGQAWGHSCEPCPRHGTETFRDLCLKGKGYSFDEVKEEIGFIIDINECVEYPNICQNGRCQNTIGSFSCHCNPGFALDSDGVNCTDIDECSIAFDVCGNGTCRNTAGSFTCDCHEGYENAMMMQMCMDIDECSRSRGLCRGGRCINTQGSFSCDCPPGHELGPNGRYCKDIDECSRSSGICSNGVCENMMGTYQCICNEGYEQTLQLTSCEDTDECTFSNGNCQSKCVNTQGSYSCACDPGYRILEDQKSCGDIDECRETPHVCSGGKCTNLPGSYLCICTEGLVDGPDGKSCIDVDECALNRNVCLN…	0.003	0	1 (1)	2	630591
Tt_053204-T1	PGLYRP3	peptidoglycan-recognition SC2-like	192	20.8	P:GO:0002376; F:GO:0008270; F:GO:0008745; P:GO:0009253; F:GO:0042834; P:GO:0045087	P:immune system process; F:zinc ion binding; F:N-acetylmuramoyl-L-alanine amidase activity; P:peptidoglycan catabolic process; F:peptidoglycan binding; P:innate immune response			MLYWVVLVCLLGKFTAEACSGVEIVTRSQWGARNPTGSSTLSTPVNVVLIHHTAGSSCDSLSLCSSIAKSIQNEHMDTNKWSDIGYSFLIGGDGRAYEGRGWTKVGAHSPNYNRKSIGISVMGNFENDTPSSTVLQGVKKLIECGVSNGYITKSHTVHGHKDAKCTKCPGVNLYNIIKTWTSYGGKLPDYKC	0.028	8	1 (1)	1
Tt_053225-T1		coatomer subunit zeta-1 isoform X2	177	19.9					MDVNLLEPTLYTVKAIAILDNDGNRILAKYYDNTFPTVKEQKAFEKNLFNKTHRANAEIIMLDGMTSIYRSNVDLYFYVMGSSHENELILSSVLNCLYDAVGQILRKNVEKKTLLENLDIIMLAIDEICDGGIILEGDPSAVVQKVALRTDDIPLGEQTVAQVLQSAKEQLKWSLLK	0.002	8	1 (1)	1
Tt_053286-T1		mitochondrial import inner membrane translocase subunit TIM44-like	460	52.7	C:GO:0005743; P:GO:0030150; F:GO:0051087	C:mitochondrial inner membrane; P:protein import into mitochondrial matrix; F:chaperone binding			MASHVLGAWLLSSRLRFPITKAIGTRIQLERLGSTACFTNIKSQPPPLGLVQLTHCQSRNFSAPQKNFFMKLIENIQQELAKNKEMKESLRKFREEAEKLEQSEALQKARKKYESIEAETVKSSQVLKEQLESWKDKLKEGIEEAQKSELGKKGLEITEEITKSARSAAESLSKHREQLSKSEKLKTVSEGVKAVRQEISESTFSRVGVYKPPVKLRKRIEKPDVGSEDKVLTPNTEATGLELHKDSKWFQSWQNFKDNNPYVNKVFDWKMKYDESDNPVIRASRLVTDKISDIMGGLFQKTELSEVLTEIIKMDPTFEKEKFLRECELEIIPNILEAMIRGDLEILKDWCHEAPFNTLAAPIKQAQSLGYKFDSRILDISNIDLAMGKMMEQGPVLII…	0.002	2	1 (1)	1
Tt_053336-T1		splicing factor 3A subunit 2-like	286	32.3	F:GO:0003676; C:GO:0005634; F:GO:0008270	F:nucleic acid binding; C:nucleus; F:zinc ion binding			MDFQHRPGGKTGSGGVASWSETNRDRRERLRQLALETIDLNKDPYFMKNHLGSYECKLCLTLHNNEGSYLTHTQGKKHQANLARRAAKEAKDSPAQPAPAKPRVDIKKFVKIGRPGYRVTKQREPETGQQSLLFQIDYPEISEIVIPRHRFMSAYEQKIEPPDKKWQYLLFAAEPYETIAFKVPSREVDKSEGKFWTMWNRETKQFFLQCSFKIDIKSKPFSLLSTNVPLTANTNLPPPPPPLIPPPPPRPPGPPPLPPPPPPPSMVPTNFDSAPPLPPPPGPSPQ	0.002	5	1 (1)	1
Tt_053401-T1	SQRDL	sulfide:quinone mitochondrial-like	449	50.1					MLTKSLTSSRLSHVPCGIVGMISSQAFSTTASREEKKSYKLVVVGGGSGGITMSAKFGSKLGKGNTGIKEPVETHYYQPYWTLVGGGMKNVENSGRPMKSVIPKTVDWIKDRVVSFEPDKNVVHTKNGHEISYDYLIVSMGLKLDFQKIKGLPEAFQTPGVCSNYSLHTVTKTPQAMKDFKEGNALFTLPNTPIKCAGAPQKVMYLTDAYMRKVGKRDKANFIYNTALGVMFSAPKYAAELLKVAKDRGIAVNFQHNLIEVNSEKKEAVFEKLSSDKEPKETVTYPYEMIHVTPPMSTPEELQKSPLVDTSGYLALNKHTLQHVKYPNIFGIGDCTNVPTSKTAAAIASQSGILRKNLKAVMAGKPLPSQYDGYTSCPLITGYNKCILAEFDFDLKPLE…	0.002	3	1 (1)	4	125004
Tt_053488-T1		zinc finger 608-like isoform X1	1606	174.1					MKDQLLDNHRQTVAAVDLKSEVPGDIKTSVTGTTQTVVAPGDISGTVTGTTQTVVAPGDITGTVTGTTAATNFDDDNNEWELGIGELIIDLDADIEKNNRNIVYGDTDGTRTSALTSARCPPSGGMSNSRTSRMNISSVKAGISSVSTIAGKSLNTVKNTGVGHQASVDKGLKMKIKRKNVGGKPSEAKHEIVQSDTKSHSAVDNNMKEDVTSPGALPDAKSKHNAGKVKSGIHREKKERNNKAHEMNLSSSVIQATDTSVNLPPASAPSVNQGVATSVLTLTNTSSRASSISGVSSVSSVTGAPCFACPTVKLENARNPMVSLKNAQNLSEGDRPKTAPVPKKIKIEAIEKMEEVLLSPAVKDNSTCTSVSTWTDPECLGPCEPGTSVLLEGIVWQET…	0.015	0	1 (1)	4	152444
Tt_053955-T1		transcription elongation regulator 1-like isoform X1	199	24.1					MYNTTIFRVETDSTETTVTQSQENKVAEDQNNKKTGRIDIGKEAAIEAELKAAKERAAVPLEIRMKQFRDMLAEKEVSAFSTWEKELHKIVFDPRYLLLTSRERKQVFEKYVKERAEEERREKRNKMKERKDDFRKLMEEANLTSKSMFSDFAQKYGKDERFKNIEKMRDREIMFNDYLQDLRRKEREERSSQREKVEL	0.002	13	3 (3)	5	1.42973e+06
Tt_054259-T1		---NA---	143	15.2					PKWTSQLTQGGPPQGCPSTGIQGQSGVLGLDPSTTRILSSHSQVAMHSKHVGGCLDPRGSKLKEQNLPWEVPSPRTGIHTEGPGMSVQFARAALNFSFKFKLNLKSRTSPCCLYITNISNTNDLTRGTSQVHLLISGASSTPV	0.017	6	1 (1)	2	240496
Tt_054312-T1	ACADM	medium-chain specific acyl- mitochondrial-like	511	57.3					MIQDTLKSEYERRSLSDRARSDVNESNTQRATLLDLIEDTREQQIYRHKQTVISMTRGVNCISRNFCVHNRFLSWEMLAGLLGRNNMSLTKIIFNKTLFTLRGTIRLLTTVPEPSKTPGRVCDGYNFELTAEQKEYQALARKFAREEIIPVARYHDETGEYPMEIMKKAWKLGLMNHGIPEKYGGAELSLLGGCLITEELAYGCTGILTAMEGNNLGQAPVILAGNEEQKKKYLTRLIEEPLMCAYCVTEPGAGSDVAGIKTKVEKKGDRWILNGQKMWITNGGKANWYFVLARSNTDPKCPASKALTAFIVDADLPGVSVGRKEWNMGQRASDTRGVVFEDVEVPNENVLLKEGDGFKVAMGAFDKTRPLVAAGATGLAQRALDEATKYTMERKTFGK…	0	5	2 (2)	4	300716
Tt_054496-T1	l(1)G0334	probable pyruvate dehydrogenase E1 component subunit mitochondrial	62	7					EIEKNVKKEIDKAVEVAKSSKEIPLEELCADVYVEPINDNIRGTTPFAVHKHRRIATPLNLH	0.003	13	1 (1)	1
Tt_054844-T1		probable aminopeptidase NPEPL1	515	54.8	F:GO:0004177; C:GO:0005737; P:GO:0006508; F:GO:0008235; F:GO:0030145	F:aminopeptidase activity; C:cytoplasm; P:proteolysis; F:metalloexopeptidase activity; F:manganese ion binding	EC:3.4.11	Acting on peptide bonds (peptidases)	MPKGMIKFGGQLSVSDPHQSPVLIIGQTKHLSRITFNDVKMKLEPKVTEETFKSAVEMLHPSPTDVCSLYLNLAAVAALPTKCSRHNSPAQSHAVTKLVRNWSNGTDESIVIICEKKDAFASACAVARAYPLYSTKSSGMSTSHSVMVEFLIVNDENLNEADLQCLTVAAEGVQLAARIVDTPCSEMNTTAFLKEVEEVGVALGIKPMVIQGHELDRKGFGGIFSVGKAASHPPALAVISHTPEGAQETIAWVGKGIVYDTGGLCIKAKTAMTGMKRDCGGAAGILGAFYASVKLGFRSNLHAVFCLAENAVGPNATRPDDIITMYSGRTVEVNNTDAEGRLVLGDGVAYAQKDLHANIIVDMATLTGAQGTATGKYHAALLTNNSDWEIAAVQAGKNC…	0	4	1 (1)	3	436924
Tt_055380-T1		microtubule-actin cross-linking factor 1-like isoform X12	791	87.7					PLTLKGAHEHELLDNTGKVTNPINKQRLTILEAVANGILNIDVKSVTDPKTEELVTLPEAFERGLITPDGEFVDVTGEAISLVEAVDKGHIKSVCHKMIFDVEGFVNPVTGDSVSFNTAVSKDYIDVRKGTFKDLTSGETMTFEESTTKKFVQPQISEMMNRKVGIVDEKGKELTVVEAVFEGLLDCKTGLVREPKTKRLVPLKEALQKNIITLEGAGVLKGLLNITVTMATVTKTLTHYVTVTSQRVTSDIRITFEDALKNGLIDETRGTFKEPKTGEIMPLEEAFNRGILELPSERVTETSEEISAYPTETFTKTIRRTIITHTEEPSPSPKGESPTKETPKVESLSPEKSSFVTSFEYKPKEEEPELTRGREPLKPKVSAEEPDTRPSVVAFQLGK…	0.002	3	2 (2)	3
Tt_055729-T1	FK506-bp2	12 kDa FK506-binding -like	190	21.4	P:GO:0000413; F:GO:0003755	P:protein peptidyl-prolyl isomerization; F:peptidyl-prolyl cis-trans isomerase activity	EC:5.2.1.8	Peptidylprolyl isomerase	MGVEIETLTPGDGQTYPKTGQTVVVHYTGTLSNGFKFDSSRDRGQPFKFKIGKGEVIKGWDHGVSQMSVGQRAKLTCSSDFGYGDVGYPGIYPLMVLSRFYCFSLYYFSHCIISHIVQTKAHHTKHEISLQERLVDNLYHHADTFEGFKRKIFTIHLTMAKACEAINTPESLLTIMLGVSEEEDKDFVDL	0	9	1 (1)	2
Tt_056366-T2	Cbs	cystathionine beta-synthase-like isoform X2	144	15.9	F:GO:0016829; P:GO:0019344	F:lyase activity; P:cysteine biosynthetic process			MSTNQENLDSSDNMPPSPTKSRSRSIDFVNLVRPDLPSKCTWHLGIDSATSPHHHVERKPLPKILPNILYHVGNTPMIRLNKIPSQHGLKCEVLAKCEFFNAGGSVKDRIGLRMVEEAEQLGRLKPDSVLIEPTSGNTAIIVSH	0.002	11	1 (1)	1
Tt_056845-T2	stai	calponin homology domain-containing DDB_G0272472-like isoform X1	335	38.4					MVGTVLMIEMVKNSVLQCFCRACHASAIEKPRPAPPAQGIANTQPSKMVYLATEVRATEQSKGGIKYELVLAAPSDVAPPSLASSPPKTSMSVEDIENKLKAAEERRQSLETQRLNQLNEKRSREQEALQKKEEYNAVFKQAARSSLEQKMEVNKENREAIIKSIQEKSRERLSRGEEIRKSLDAQTQEILSNTQKKIESATEAREAQISALRERLREHDKHIAEVRQQLSAQADDLRERCQKKLELAQEKRDSIFKVLQEKLQEHKQHVLQVRQINEIINQESEHKKDCISKKLEEAENKRQRQFQAILEKLHEHERHAEEVRLNKAQNIGGVA	0.002	3	1 (1)	2	458074
Tt_056901-T1	HADHB	trifunctional enzyme subunit mitochondrial-like	328	35.4	F:GO:0016747	F:transferase activity, transferring acyl groups other than amino-acyl groups			MNLLATGQCEVAVAGGVDFMSDVPIRLSRPLRKVLLSANKAKSLGQKLGLLTKLRPKYFVPELPAVSEFSTNETMGQSGDRLAASFGVSRREQDEYALRSHTLADKATRGGLLEDLTPFTVPGTELPVAKDNGIRVSTLEQMAKLKPAFIRPNGTVTAANASFLTDGASACLLMTEEKALSLGLKPKAYLRDYVYVSQDPKDQLLLGPSYAVARLLDKVGMTLNDFDVYEFHEAFAGQILANLKAMDSEWFAKNYLLRSSKVGTPTMEKFNSWGGSLSIGHPFGATGARLVTMAANRLIKENGQFALIGSCAAGGLGHSSIVERYPVK	0	6	1 (1)	3	123619
Tt_057454-T1		heat shock beta-11-like	213	25.2					MAVRLTTRVIPVWKVLPRLSPWFRRNVFYRSFTPAQVRRCSGRRWVEPFSELSSVIRNMERQVQEVDREVKRMFDEVERASPLRFPRVLQPWWWSRRRNVPVETTGDEKRQYKLELDMSDFNPEDIKITVKDNLLTVYARQDVKKPDGSRFLREYNHEYTLPEEVNPESVRSVLNPNGTLIVEAPLPAVELPQPKEIPVTKEHSQDSKSEEGS	0	10	2 (2)	3
Tt_057464-T1		apoptosis inhibitor 5-like	535	60.6					MDSVEKLYRNYEILADAKEKILEHEKEYIEILEAVKGSGNEKRLASQFITRFFKNFPHLVDKAIDAQLDLCEDDDIAIRKQAIKELPSFCKENKEFVPKIADVLAQLLQTDESSELIVVHAALMTVFRISAKDTLGGLFSQILNGEEIVRERAIRFLNNKIKALPSDVMTKELEEYIFQESKKVMQDVTGEEFVTLMNLLSGLKISKTIPGQQALVDMAVDMLDIDKEFEHTDSDSVVRVMQCIRQAMPFFNPYVGSGRFVQYVCNQVVPVLGNLPTIEEGVDVTLELLKLLADMSPSAVNMEENQKCLEIVFNKLLEYMPLPPSDENVENSTPSDEPSLQLSHVECLMYTFHQLCKQNPEFLSSEESAERLKDFKLRLQYLARGIQGYIKKLRAALQG…	0.002	2	1 (1)	2	664129
Tt_057959-T1		N-acetyltransferase san	174	19.8	P:GO:0007064; F:GO:0008999; C:GO:0009323; P:GO:0016573; C:GO:0031415	P:mitotic sister chromatid cohesion; F:ribosomal-protein-alanine N-acetyltransferase activity; C:ribosomal-protein-alanine N-acetyltransferase complex; P:histone acetylation; C:NatA complex	EC:2.3.1.5; EC:2.3.1.88; EC:2.3.1.128	Arylamine N-acetyltransferase; Acyltransferases; Acyltransferases	MTKSRGGTIELGDVTPHNIRQLKRLNQVVFPVSYNDKFYKDVLEAGELAKLAYYNDIVVGAVCCRVDTSDSSRRLYIMTLGCLAPYRRLGIGSKMVEHVLKYVEKDGNFDSIFLHVQINNDSAIEFYKKFGFEVVETKEHYYKRIEPADAHVLQKTLRSSKGVSQITQNGIDHS	0.002	9	1 (1)	1	183318
Tt_058730-T1		nesprin-1-like, partial	711	81.8	F:GO:0003779; C:GO:0016020; C:GO:0016021	F:actin binding; C:membrane; C:integral component of membrane			MDVKRIEDEYKQFKANVDEMKSSIDVGMVKWTEYEEQFKKCSKWVEETEPLLQSFLTLQADLLKKRARLEEFQGHLQTIFDWQAEFDKLNVRAQLLLETYSDSSISNAFTQLSTKYSNLLSLSKEVMHKLEQHFQEHQQQQCMLTECIEFIDIARERLKDCCRPSHSVDELNAKLNSLKSLASNMEQGQNKVRYVLELTEKVIVNTDSSGISSIQEDAENLKTDFDKLVKDISDARVYLASRIAELDEFTKILKQFQEYLEETENTVNADSRQELISITEKKYLFDNYRAILKDMDIRRETIDRLNQGMEKNPQDADVAKNSIEKFQNLMETLKKAVSVLAIEIKDLETYSSTKQETEKWLKEMKLKVQKCGECVGDHSTIQQQQEELLLVKESLPNGE…	0.043	1	1 (1)	1	404849
Tt_058789-T1	casp	dnaJ homolog 1-like	342	38.3					MGKDYYRILGIDRNASEDEIKKAYRKLALKYHPDKNKSKDAEEKFKEVAEAYEVLADKKKREIYDQYGEDGLKGGVPGTEDGKQFNYTFHGDPRATFAAFFGTDNPFESFFSGGLGGQTGMFFMQDNMDGNDPFVNFGGGNAFRSQAFSTSSPNLTGHRAQKQDPTIEHELFVSLEDVMKGCTKKMKINRKVINPDGRTARPEEKVLTINVKPGWKAGTKITFQNEGDKLPGAIPADIVFTIRDKPHPLFKRDGSDIKYMAKITLKEALCGTKIQVPTLRGDRIPLRLEGVIKPQTVKRIQGQGLPYPKEPSKNGDLLINFAIQFPDSLTETTKQILWDCLP	0.007	7	1 (1)	2
Tt_059018-T1		uncharacterized protein LOC114132856, partial	149	17.2					MNSNFNWRGLLSARVIYPINPNPQVRLSHLFMSEPAKKLQEENLTPGDFYKVWLVCKSEISIIKRLLAHNITELMKVRKKLLKNEVILASLYLDHRFSVLICEAEQEQAVNHLIKLNVILCAMNPKLELQVTWKCEEQMASSTSVGKDV	0.041	7	1 (1)	1	238561
Tt_059517-T1		propionyl- carboxylase beta mitochondrial-like	435	48.8	F:GO:0016874	F:ligase activity			MAFSLRILSNGKFFPHLPKYSKNYIFYEAKRWCTVAHTLSVRQRIEEKRKEAVLGGGQNRIDGQHKKGKLTARERINILMDPGTFVEYDMFAEHTCTYFGIDKEKYPGDSVVTGHGLIHGRTAFIFSQAVTNEDVTQEELGGAKTHTTTSGVAHKAFENDVQALLQLRKFYNFLPLSNKDPAPIRECDDPWDRIVDGLETVVPLESTQAYNMLDVILGVVDERDFFEIMPSYAKNIIVGFGRMNGRTVGIVGNNPKSAAGCLDINSSVKGARFVRFCDAFNIPIITFVDVPGFLPGTSQEYGGIIRHGAKLLYAYSEATVPKITVITRKAYGGAYDVMSSKHLRGDINYAWPTAEVAVMGAKGAVSIIYRGKEDIERYAQEYMETFGNPFPAAIRGFVD…	0.018	2	1 (1)	1	267830
Tt_059604-T1	RpL36A	60S ribosomal	105	12.4	F:GO:0003735; P:GO:0006412; C:GO:0022625	F:structural constituent of ribosome; P:translation; C:cytosolic large ribosomal subunit			MVNVPKTRRTFCKGKCKKHTVHKVTQYKKGKDSIYAQGKRRYDRKQQGYGGQTKPIFRKKAKTTKKIVLRMECSECKCRKQLPIKRCKHFEIGGDKKRKGQMIQF	0	12	1 (1)	4	894149
Tt_059756-T1		cytochrome c oxidase subunit mitochondrial-like	113	12.9	F:GO:0004129; C:GO:0005751; P:GO:0022900; P:GO:1902600	F:cytochrome-c oxidase activity; C:mitochondrial respiratory chain complex IV; P:electron transport chain; P:proton transmembrane transport	EC:1.9.3.1	Cytochrome-c oxidase	MSQLFRIIARRSANGLRAYSTDFGSAPSAGEHSGGARLWKILSFTVALPGVVVCMVNAYIREKEHEHDERPEFIPYEHLRIRTKRFPWGDGNKTLFHNPHVNPLPDGYEDVHH	0	18	1 (1)	1	633131
Tt_060600-T1		MAM and LDL-receptor class A domain-containing 1-like	3610	407.4					MIQTLLIYQSLQQPENMTQPXXXXSENDLTTINLPVSTTTRENDPTTVNLPESTTVREKDLTTINLPVSTTVRENDPSTNNLRSSETTIENYITTVNLLDSTTTKENYLTPKTSKTFTTPTIIDSKTTISEGTTTTEQEEVSFFPSTDQFSLKTEHFTRYTMTSNNISQTVTESAEDSTFSPSFTSGPPEKGENITLIWTPKNTTVIRSDPATFFCKLNTTEITDVTWARNGVELIPTQSVKDNDTFRIVKVKNGCVLRILRVLYNWDGDKISCVISKKGQNKTINIDSWIKMDSNPTCDFPRITFHPQPTKVVKAGGNVTYNCNANGYPLPNFLWLKDMVPIPSEEERFIVDTHGNLTILDIEEKDGGKYECIAENERGSIMSRGSHLYVGAVQVPPY…	0.002	1	2 (2)	4	313170
Tt_060719-T1		uncharacterized protein LOC106473217	324	36.2					MADVNDSTLLFFVRATPAQWDYALSLYNDVLNLKAAKRTKKNGPEEFINLDTWYHEQLPKIIHARKDPHITHEELVQITKWKLIRGKFRPRLMDLVRINTEAAVKQTSKKAFRKLPNISNAITALTTLKGVGPATASAILAAGYPDQVAFMADESMLSTPGVEAIDYTLAEYLNYHEQIKKCCDQLNKKNPEGKWTPHKVELTLWTHYLARELNPSLLEGMPKAEADDNPATPNGKSSSDQDNEPLDDQTSTVVNKEQEDNSEETGEDSHDSKISSTDIFSTGPEKSGYSNLDNSISNDGVEENTENSESCPSEEPAVKKVRVQ	0.016	6	1 (1)	1
Tt_060721-T1	sta	40S ribosomal SA-like	311	34.3	F:GO:0003735; C:GO:0005737; P:GO:0006412; C:GO:0015935	F:structural constituent of ribosome; C:cytoplasm; P:translation; C:small ribosomal subunit			MKVVRRNSWSAIMSGGLSVLALQQDDVTKFLACSTHIGTNNLDYQMEQYVFKRRSDGVHLINLKKTWEKLLLAARAIVAIENPADICVISARPYGQRAVLKFAAATGSTPIAGRFTPGTFTNQIQAAFREPRLLVVTDPRVDHQPVTEASYVNIPVIAFCNTDSPMRYVDIAIPCNNKGPHSIGLMWWMLAREVLRMRGTISRAIKWDVMVDLYFYRDPEEAEKEEQAQVQEEKVPKEAAETQAEQWGGGDVGIPQPDVEEWGAEPIPVMGTPVTAPAPTEDWSAVTDDWSAASTGGTPAAWGGSGADNWD	0	13	4 (4)	10	4.15539e+06
Tt_060734-T1	ATPsyn-d	ATP synthase subunit mitochondrial	173	20.4					MAARRISKSAIDWVAFSERVPETQRTMYQAFKSKSDGYVRKVWSYPENPPAIDFSFYRARVAMPAIVGEFEKAYKALKVPYPSEKVTPQIDAQEKEAQKEAEVFKKESSNRIEEYNNQLAWFKKLIPFDQMTMEDFRDYFPDIAVDPLNRPTFWPHDPEEEKEIAELEAQKHH	0	17	3 (3)	5	824816
Tt_060768-T1	RpS16	40S ribosomal S16 isoform X2	149	16.8	F:GO:0003735; C:GO:0005840; P:GO:0006412	F:structural constituent of ribosome; C:ribosome; P:translation			MMGTMQKESVPSVQVFGRKKTATAVAYCKRGTGLIKVNGRPLDTLEPQILRYKLQEPVLLLGKERFSGVDIRVRVKGGGHIAQIYAIRQAISKALVAYYQKYVDEASKKEIKDILIQYDRTLLVADPRRCEPKKFGGPGARARYQKSYR	0	58	10 (10)	29	8.4099e+06
Tt_060955-T1		cell division cycle 5	814	93.1	F:GO:0003677; P:GO:0051301	F:DNA binding; P:cell division			MPRIMIKGGVWRNTEDEILKAAVMKYGKNQWSRIASLLHRKSAKQCKARWYEWLDPSIKKTEWTREEEEKLLHLAKLMPTQWRTIAPIIGRTAAQCLEHYEYLLDQAQKKDEDGEMVDDPRKLKPGEIDPNPETKPARPDPKDMDEDELEMLSEARARLANTQGKKAKRKAREKQLEEARRLAALQKRRELKMAGIELPPRKKKKKGVDYNTEIPFEKKPAAGLYDTSEESYDPAEHDYRRLRSQHLDGELRSEKEERERKKDRQRQKQRKENDVPTAMFSGNMEPVKKRSKLILPDPQISDMELEQVVKVGKANEIAREIIDEGANKASDTLLSDYDITPGITSVRTPRIPASSRESILQEAQNIMALTNVDTPLKGGLNTPLHESDFSGATPKTQQA…	0.002	2	2 (2)	4	237007
Tt_061113-T1	FK506-bp2	12 kDa FK506-binding -like	103	11.2	P:GO:0000413; F:GO:0003755	P:protein peptidyl-prolyl isomerization; F:peptidyl-prolyl cis-trans isomerase activity	EC:5.2.1.8	Peptidylprolyl isomerase	MGVEIETIKPGDGQTFPKVGQTVVVHYTGTLSSGEKFDSSRDRGQPFKFKIGKGEVIKGWDHGVAQMSVGQRAKLMCSPDYAYGEIGHPGIYPFSVFLISFQV	0	17	1 (1)	1
Tt_061178-T1	EIF3I	eukaryotic translation initiation factor 3 subunit I-like	325	36.4	F:GO:0003743; C:GO:0005852; P:GO:0006413	F:translation initiation factor activity; C:eukaryotic translation initiation factor 3 complex; P:translational initiation			MKPLLLHGHERAITQIKYNREGDLLFSCAKDHTPNVWFSLNGERLGTFNGHNGAVWCIDVNWDSTKVITGAADNTCKIWDLETGTEITSICTENAVRSCGFSYSGKQIMYTTDKSMGFESSIYIFDLETGKQLTGEDSLLKAQSSGNKITSAIWGPLDEYIITGHENGDLVKWDVLTGNKIQRVQEHKGTINDLQHYKDQSMFITASKDKTAKLFDTETFEHLKTYKTERPVNSAAISPIRDHVVLGGGQEAMDVTTTSARAGKFDARFFHLVFEDEFGRVKDHFGPINSVAFHPDGKSYSSGGEDGYVRVHVFDPPYFDFLFEC	0.002	3	1 (1)	1
Tt_061248-T1		splicing factor 1 isoform X1	629	67.9	P:GO:0000398; F:GO:0008270; F:GO:0045131	P:mRNA splicing, via spliceosome; F:zinc ion binding; F:pre-mRNA branch point binding			MATGANTTPLGRLNPTLSSNMKTPTGSSLLKPSYMTTQTSGKRSSDESGLELQSTNWPPEMPERSRKKRRSRWGGDDKDKVFIPGMPTVLPSSLSFDQERAYLLQLQIEEISRRLRTGDLGIPPNPEDRSPSPEPIYNSEGKRLNTREYRARKKLEDERHSLIQEMFSINTDYKPPADYKPPVVRVSEKVMIPQDEHPDINFVGLLIGPRGNTLKSMEKETGAKIIIRGKGSVKEGKVGRKDGQPLPGEDEPLHAFVTANNPESVKKAVDKIQEIVRQGVEVPEGQNDLRRMQLRELALLNGTLRENDSPRCSNCGATTHRGWQCPDKPNVTNNVVCTNCGGAGHIARDCRERKVGKPAFVSGDKSKIDEEYMSLMAELGEGPPPPSKTGTTTTQITHQ…	0.002	3	1 (1)	2	325876
Tt_061298-T1	LKR	alpha-aminoadipic semialdehyde mitochondrial	940	104	F:GO:0016491; P:GO:0055114	F:oxidoreductase activity; P:oxidation-reduction process			MMWKFSQTTGSVKFGHLFRNCNFDIGLRCSSTGKLVAIRREDASVWERRAPLAPSHVKKLVRKGIKVIVQPSNRRAYPMLAYVNAGAIIQEDISEASIIFGVKQVPVDALQPNKTYVFFSHTIKAQEANMSLLDAILERNIRLIDYEKMVDSGGQRVVAFGKYAGVAGMINILHGLGLRLLALGHHTPFMHIGPAHNYRSSGMARQSVRDAGYEIALGMMPRSIGPLTFVFTGSGNVSQGAQEVFQELPYEYVEPEDLPQVSEHGSMNKVYSTVVSRDDHLERKEGGSFDPEEYDQHPERYFSTFAKKIAPYASVIVNGIYWGVGSPKLLTIPDAKHLLQPSYTPWLPISVGSPALPHRLLAICDISADPGGSIEFMTDCTTIDTPFCLYDADQHKNSE…	0	2	1 (1)	2	239805
Tt_061579-T1	AIMP1	aminoacyl tRNA synthase complex-interacting multifunctional 1-like	309	34.6	F:GO:0000049; F:GO:0003723; F:GO:0004812	F:tRNA binding; F:RNA binding; F:aminoacyl-tRNA ligase activity			MITESVVQRLAIRATQAEEFITFVRTQIKEIRQTLGSEYAEKITSRLKLENEQLKREVEMWKEKLIQAEIKNGVKQIRVPSSTIVSSDQVIHDVAMPGEKSVQLEPEKMVELKQEPGYFKEVKKNIESKGKSKKVEQQGNQEDIKPVDVSRLDFRVGHIISAERHPDADGLYVVKVDVGDGKPRTVVSGLVKFVPIEEMQDRMAVLMCNLKPAKMRGVISEAMVMCASTPEKVEILDPPSGCKPGDRVFCEGFSGQPDSQLNPKKKIFEQVAPDLKTNDDKIATYKGIPWKVEGKGIVTAPSLCNVQIK	0	10	2 (2)	4	603894
Tt_061858-T1		tachylectin-3	152	17.1					MGTVYVWLTLALLYLVHITGGRHTGCERDTSLDGTLMRYPGHYAVYQIIDGCKHRVPRIRTYENLYKDTNCIKTDTSIRNLCKCHSLSIYATLIKGSGPAVYLLSNGVKRHIANPDTFNAFCFDWDKIKTISDFAVNRIFTGSSIKIMTAVP	0	22	5 (3)	56
Tt_062154-T1	Cox4I1	cytochrome c oxidase subunit 4 isoform mitochondrial-like isoform X1	180	21					MAGYLLKVATKHLPCRYVVSRIVIPSVAYHKERIGNREVVGFGLNGEPSYIDRTDFPMPAIRFKENSQEISTLREKEKDDWKKLTMDEKKALYRASFCQTFAEMKAPTGEWKSVLAGTLVAMSLTIWIFVWMKKFVYQPMPESFSPERKAAQLQRMIDLRVNPIEGLSSNYDYENNRWKD	0	14	3 (3)	3	1.0625e+06
Tt_062391-T1		prickle 3	275	31.3					MADTVTVDVDLRGLNGVGPFKSPQEIFQETGVLVQEVDEGQPCLHCKDKCPGFSPHIWRKVCNNCKCPREAHDVYHEEFVNVRDRIGIKSAPDPTKTVSKEKTLQEGYSWCPPGLSSDKVEEYFAQLPNHKVPRLGTPGEKYRDKQLMLQLPKQDLALAYCKFLEREYYQNFEDFVNARNEIALDIGYVRETLDQTLECYKCHGVLPQGDIAVIAPKFGENVAWHPACFVCTSCDELLVDLTYCVWESKPYCERDYAEQLKSRCAACDENCQSLH	0.002	5	1 (1)	1
Tt_062471-T1	RpL24	ribosomal L24	155	17.8	C:GO:0005840	C:ribosome			MKLELCAFSGYKIYPGHGKRMVKSDGKVYQFLNAKCEASHMMKRNPREITWTVLYRRKHKKGLEEEATKKRTRRTTKFQRAIVGASLNDIMAKRNMKPEVRKAQREQAIRAAKEKQKAEKAQKKTTAPPKPQKMVSKQKAAKPVQAKAPRVGGKR	0	16	3 (3)	9	3.72705e+06
Tt_062526-T1		uncharacterized protein LOC106459310	112	13.3					MPSLQTSPVSGLLKLIRVRRFPGEQMRKDCLSHRNTQKLFIMEKTSVRILQGNDRHHMETIFLLLRTVMFGNIFTRLLFRAKYRSCNHIENCWAEQNRKTVNHDPKQPTVFL	0.048	9	1 (1)	1
Tt_062651-T1		ATP synthase-coupling factor mitochondrial	114	12.9					MAAIKHVCQLLSLRRSFSRTVLKRNFGVSVVVVQKIQDPIQKLFVEKLKEYTQKSKSQGGGLVDASPDTQKQMKEELEKIEIQYGGGKGIDLNKFPTFNFKDPEIDPINMEGKH	0	21	2 (2)	4
Tt_063020-T1	Fas1	fasciclin-1 isoform X2	609	69.6					MKFLRLVDQDEVIQLFLMKRKVTVFAPTNEAFDKFRQFTAEEESRLATFYVVNFVVTKDIFPDVINSNNQQNAPLYLTTSDSDDKEEKEYFVNNAKIIEEREYNIKDGKQKLLIIDEVLEPYRSNTNLPPDAWEFLIQPSKYNLQENLGAFASRVRSEDVTELFTRVGNHTFFLPVGEGNDQNLNRLRDIDGKVIKGHIIPNMVLFTRTMGMEPYRTGAYDPTQLRVELSLVNQTNSQGNGYTLFAQSNTLQSDHRHRKGVVLSKILRSNIPVKNGVIHLIEAPLMIINITILEFLQREADGRLYEFNQLVKHVSEFRYELNTAQEKTVFVPTNEAIRRLDNLNDLKGNITAITNLVRLHMVMRSVSTDDVRNGRIKEHLAADNRHSLYFRVVGEDRNR…	0.048	1	1 (1)	1	5553416
Tt_063078-T1	Ndufa8	NADH dehydrogenase [ubiquinone] 1 alpha subcomplex subunit 8	175	20.5	C:GO:0005747; P:GO:0006120; F:GO:0016491	C:mitochondrial respiratory chain complex I; P:mitochondrial electron transport, NADH to ubiquinone; F:oxidoreductase activity			MTITEDCKLPTEKELTVEELNISSPSLLAGSYYFGKYCDEQSKEFMLCRREEKDPRKCLDEGKAVTSCALEFFRQVKKTCRESFEAYAHCLEYSSPEMAFKYCRKTQAALDNCMMDKMGLERPELGYFSRPRVHKTQRPKPEPETLPKYSDQIPSLPDDFPREPAKYGSRWFFFN	0	10	2 (2)	2
Tt_063279-T1	RpL23	60S ribosomal L23	140	14.7	F:GO:0003735; C:GO:0005840; P:GO:0006412	F:structural constituent of ribosome; C:ribosome; P:translation			MSKRGRGGAVGAKFRISLGLPVGAVLNCADNTGGKNIFVIAVSGIKGRLNRLPAAGVGDLIVAAIKKGKPELRKKVMPAVVIRQRKPFRRKDGVFIYFEDNAGVIVNNKGEMKGSAITGPVAKECADLWPRIASNASSIA	0	34	5 (5)	15	4.42227e+06
Tt_063296-T1		PH domain-containing DDB_G0274775-like	392	44.6					MPKLEGYLSKRGKLNLRCSWKKYWFVLDGRQFMYYKSKASYESLGVCKRMIDFSQIQFVRMINSTLNFEFDVITRRKAIHLAAFESETRRLWVEALQKLIGRPVEVSGPMNAQRISAPRLSKLFDTSSSNKAYVNEMHHDGNETQFGTDEEKYPDSKSEIENDSDYINNDGLHCSSEMYEIKSKSFPENEGTGTLENGLGFECVYSLNNIHNSSLSTEKHQLLSSEDNKSSTLTILQDSQETGYHNSLATDFQKTGNCNLQNAVAQSLLENSSLEQNWINLTPELYKGDVPNTSYHSLPEYIFFEDLCEAEVTDNVSHLVLTEDTPRSSSPEESLTDIVDSYAVKELKNFITSLGKEQETEIYTINKTGKSTAVKSMKSFLDDMNQEEKLSC	0.03	2	1 (1)	2	310451
Tt_063449-T1		mite allergen Lep d 7-like	213	23.7					MKIALLLTTQIVILFFSHQGDGHQIEKRQVTCPSVANINNYLDQVISNARSEIPDPLRLPDKNDKVELRNGKIEGLSTLYRSGDAKISCTGSAISLEVNLGVRRLKGRYDWKKKILFIKFRGSVGAEVRSFSVYGKITQKIAPGAHPSIEKLDITSLKRLKIRITGLGPITWALSQIATLLGRIFKKAIANALEKPIRKALNKQLQKINLPIP	0	46	8 (8)	50	2.32999e+07
Tt_063510-T1		proliferation-associated 2G4	394	44.1					MADKDENEPTIAQDLVVTKYKMAGEMVNRVLKKLIERCRDGVSVLSLCELGDSLLLEETGKVFKKEKELKKGVAFPTCVSVNNCICHFSPLRSDPDVTLKEGDVVKLDLGAHIDGFIAVVAHTLVVGTCKENKVTGRKADVIRAAYFAAETALRMVKPGRDNIAVADAIQKVAESFNCKPVEGMPSHQLKQFQIDGEKSIIQNPTEAQRKEHEKCEFEFHEVYAIDVLISTGEGRGREMDTRTTVYKKTDETYQLKMKASRVFFSEVEKKFGYMPFTIRALDDEIKARMGVVECVNHKLIEPFTVLYEKEGELVAQFKFTVLLMPSGSHKITGEAVDLNMYETDCDIKDDNIKALLSKSVVPKSGKKKKKKAEKSAAETVEKEDSNNTIRTENV	0.017	2	1 (1)	1
Tt_063775-T1	RpL32	60S ribosomal L32-like	134	16	F:GO:0003735; C:GO:0005840; P:GO:0006412	F:structural constituent of ribosome; C:ribosome; P:translation			MTIRPLVKHRIVKKRLKKFIRHQSDRYVKIKPNWRKPKGIDNRVRRRFKGQYLMPNIGYGTAKKIKHILPNGFKKVLVHNSRDLEMLMMQNRRYCAEIAHGVSSRKRKEIIERAQQLAIRVTNANARIRSEENE	0	22	3 (3)	5	2.35654e+06
Tt_064137-T1		pleckstrin homology domain-containing family F member 2-like	390	42.3	F:GO:0046872	F:metal ion binding			MVDRLVNSEANACRIAAVESCFGSSGQPLAVSGRVLVGEGVLTKMCRKKPKPRQFFLFNDILVYGNIVINKKKYNKQHIIPLEEVKLENLADDGALKNGWFIRTPTKSFAVYAATATEKSEWMAHITKCLEDLLKKTGKKQSTEHAAVWVPDADATTCMHCRKSQFSMINRRHHCRKCGAVVCGPCSNKKFLIPSQSDKPLRVCLACYDTLSKSAATTGSDLSPVSQDKPELPDSSGEDDSEEEGDDAIKEKGTNSDGKTADLQVLSTDDKPTFYRNHSEIETHSNSNKSEEKNKNVSDNDNNSDETRNDSNANNLEVSESHSTELSSVIKSDSTSVELIKSDSTSVELSSSSSVTQSVSHETTSCVSSSCEVSNDSASGGGCDAGGSYD	0.002	6	2 (2)	3	157322
Tt_064143-T1	RpL12	60S ribosomal L12-like	165	17.9	P:GO:0000027; F:GO:0003735; P:GO:0006412; C:GO:0022625; F:GO:0070180	P:ribosomal large subunit assembly; F:structural constituent of ribosome; P:translation; C:cytosolic large ribosomal subunit; F:large ribosomal subunit rRNA binding			MPPKFDPTEIKIVYLRAVGGEVGATSSLAPKIGPLGLSPKKVGDDIAKATADWKGLKITVKLTIQNRQAQIEVVPSAASLIIRALKEPPRDRKKVKHVKHSGNLSFDEIIEIARTMRSRSMARYLVGTVKEILGTAQSVGCTVDGSNPHDIIDKINEGELEVPDE	0	38	5 (5)	17	5.89788e+06
Tt_064306-T1	baf	barrier-to-autointegration factor-like	90	10	F:GO:0003677	F:DNA binding			MSSTSQKHTNFVSEPMGDKAVTDLAGIGEVLGKRLGSKGYDKAYVVLGQFLVLKKNKELFIDWLKDAAGANSKQASDCYQCLRDWCEEFL	0.002	13	1 (1)	2
Tt_064759-T1	RPLP2	60S acidic ribosomal P2-like	115	11.7					MRYVAAYLLAVLGGNKNPSAKDLEKILGSVGIEVQSEQLSKVMKELGGKDVNELMEAGKAKLACMPVGGGAAVVGGTAGGGGTSGSAPAAEEKKEEAKEESEESEDDDMGFGLFD	0	14	1 (1)	1
Tt_064830-T1		RNA-binding 4B-like isoform X2	220	25.3					MAPVKKSSKLYVGNLPETCSNDDLNTLFSKYGEIEECDVVKNYGFVHMASEEAANTAIQELNNSEFMDKKITVELSHSKVRQKAGMGGKGTCYRCGRAGHWSKECPRNPNARYSRLPPPMTTYGSYPERSFGRYGPESRYDRFSDGYGFDRFSERSYAVERMRPYPDPYERRLPPPPPSATTSRADDLYYRRPYDDYGFDYPPVDRGYDRYASFAEDRIT	0.003	7	1 (1)	2
Tt_064892-T1	Aats-val	valine--tRNA ligase-like	624	71.4	F:GO:0002161; F:GO:0004832; F:GO:0005524; C:GO:0005737; P:GO:0006438; P:GO:0106074	F:aminoacyl-tRNA editing activity; F:valine-tRNA ligase activity; F:ATP binding; C:cytoplasm; P:valyl-tRNA aminoacylation; P:aminoacyl-tRNA metabolism involved in translational fidelity	EC:6.1.1.9; EC:3.1.1.1	Valine--tRNA ligase; Carboxylesterase	MCRAVTEAFVRLHDEGLIYRSYRLVNWSCTLRSAISDIEVDKLQLPGRTLLSVPGYKEKVEFGVLVFFAYIVEDSDEEIIVATTRIETMLGDTAIAVHPKDNRYTHVHGKFVVHPFCNRRLPIVCDEFVDMEFGTGAVKITPAHDHNDNEVGKRHNLPMVNIMNDAGNICEDCGAFSGMKRFEARKAVLEALKEKGLYRDTKDNPMVVPICNRSKDVVEPLLKVQWYINCTEMAQKAAQAVQDGELKIIPELHVKTWYHWLENIRDWCISRQLWWGHRIPAYLVEISGQDKLPGAEMDNQYWVSGRTEEEALQKAAERFSVDPHKISLKQDEDVLDTWFSSGLFPFAIFGWPDSTLDLQTFYPGTLLETGYDILFFWVARMVMLGTKLMGRLPFKEVFL…	0	4	1 (1)	1	152573
Tt_064984-T1		coatomer subunit alpha-like	1220	138.6	F:GO:0005198; P:GO:0006886; P:GO:0016192; C:GO:0030126	F:structural molecule activity; P:intracellular protein transport; P:vesicle-mediated transport; C:COPI vesicle coat			MLTKFETKSARVKGLSFHPKRPWVLTSLHNGVIQLWDYRMCTLLDKFDEHDGPVRGICFHNQQPLFVSGGDDYKIKVWNYKHRRCIFTLLGHLDYIRTTTFHHEYPWILSASDDQTIRIWNWQSRTCIYVLTGHNHYVMCAQFHPSEDLVVSASLDQTVRVWDISGLRKKNVAPGPTGLDEHLKNPSHTDLFGQSGAVVKHVLEGHDRGVNWAAFHPTMPLIVSGADDRQIKLWRMNDSKAWEVDTCRGHYNNVSCVTFHPRQELILSNSEDKSIRVWDMSKRTCLHTFRRDHDRFWILTAHSSLNIFAAGHDSGMIIFKLERERPAFAVYGNVLYYVKEKHLRKLDFTTSKDRAVFQLRAGSRSPVFNISYNPAENGLLVCTRTTNIDNSTYDLYAIP…	0	2	2 (2)	2	243011
Tt_064992-T1		plasminogen activator inhibitor 1 RNA-binding -like	385	43.1	F:GO:0003723	F:RNA binding			MMENAYGIGVKNRYDIFLNEDEDPLEILKQQEEKKEKKKTDKVSKEPKVKSVKIGKQNVIPPAPKKGGKEDVNNVRTQELQQKRSERPPPRISGDKTRFIPHDDHKENEERKNRRNKEAPFPQVDGRDCGDGEFGMRRGRGGGRGRGRGGRGRGIGIDGRGKREFDRQSGSDKSGVKPVDKKEGGGAHNWGTMKDELDSMQFNMSKDEVPEMDRSADIAQETTELKEGEGEAVGDEGKISADDEPKEMTLDEWKQQQEEMRSVPKFNLRKPGEGENQTQTGKKLYILKKKEEEEDEIEDEEESEDEDELSRRGRQKHVVDIEINFSDSRRGRGRGRGGMRGSGIRGGRGGGSIGSGRGLPKATKSSRQAAPKVDDLEDFPSLATA	0.04	3	1 (1)	1	63051.2
Tt_065464-T1	alpha-Spec	spectrin alpha chain-like isoform X2	1803	208.3					MDPQPRDVKILETVEDIKERRDQVLGLYSEFKSEARVKREKLEDSRRFQYFKRDADELESWINEKLQAASDESYKDPTNLQAKIQKHQAFEAEVAAHGNAIVALDNTGMDMINKNHFASDVIKMRLEELHRLWELLLARLAEKGLKLQQALKLVQFLRQCEEVMFWINDKEAFVTSEEFGQDLEHVEVLQRKFDEFQKKDMANEEFRVTEVNELGSKLIVEGHPEEELIHKKKVELNETWERLKALTLLRQEKLFGAHEIQRFNRDADETIAWITEKDLILSSDDYGKDLVSIQALQRKHEGMERDLAALEDKVLTLGQEADRLCTNHEDHADEIQSKHAEIVSNWEELKAKAQERRQHLDESYNLHHFLADFRDLVSWIHDMKSIISADELAKDVAGA…	0	3	3 (1)	7	258545
Tt_065556-T1		starmaker-like isoform X1	623	70					MSRRGYNGSPWQQGGPNFGVNQLGLGFGNVLGMMNMERLMRGAGGGFGVGMGFGVTNGGMGMNQMMGLLDPVGRNDRMGMIDQGNQRNRRGRLDSGRNQMRRRSSQQQSPGGGQRRRPVQQQGSRGGQRKRPMQQSPGGGSRPKQQNLGAGQGQKNRQEIKNEGDDKEGQEVYNPASPTSDDAEQRFRNQVNGQNQNISTDQQAKGEVKVANEMRRRKGQDRNTFYCTVCEREYRGSFLQHRKTSKEHRKNRDRKYPKCRLCRKSFNSQAELQQHQKTAKHKKSEDGNWNDEKDTNDDEFSASDSEDKEEEKTDGDEGTQLVGRNYVVKVKGFFCKICHKFFKDSISAANAHCKTEEHCKNYEKIQEAIEKRKAVEEAKKAAEETKQKTEEDTEMESEL…	0	5	1 (1)	3	417501
Tt_065641-T1		collagen alpha-1(XI) chain-like	1708	172.4	F:GO:0005201; C:GO:0005581	F:extracellular matrix structural constituent; C:collagen trimer			MRKDSVCVMARPKCGSQCYNNVNLRLLSRKTSVHRDFPTLCIITFVVISTGVFRPVKGVLPSGSADLLQSVGISGEQIGIGITEGICDNRAIRIEDGKPVYGTPDRAYTITENAVLTASTSHVFQGGVPIDFSVLTTFRAEQGSEGYLFSVYDNEGNEQLGLKVGDNVTFTCRRSLEASDLASANFDLRINDGKWHRLSLSVKGDSVSVLNGCGPNRQTETLQFSRDADAYIDTSGITLVGQELHNGGFFRGDIQQLQVIPTPQAAYEHCVDYMPDCDTPFPYAQPPEAEVYPVYPYPVDEDLPPISPEEKEEEPTYPDASYDVTNFTVMEDNVTTEVSTDEGRYHYYSVQGPPGPRGYQGPPGPPGLKGDKGEIGRDGYPGTSGLPGPPGHIFMIPVQ…	0	1	2 (2)	3	384415
Tt_066233-T2	CkIIbeta	casein kinase II subunit beta	227	26.3	C:GO:0005956; F:GO:0016301; F:GO:0019887; P:GO:0045859	C:protein kinase CK2 complex; F:kinase activity; F:protein kinase regulator activity; P:regulation of protein kinase activity			MKTFRSESEENELEIEVDESLKPLMQCFVAVDEDYIQDKFNLTGLSEQVPHYRQALDMILDLEPDDELEDNPNQSDLIEQAAEMLYGLIHARYILTNRGIAQMIEKYQNGDFGYCPRVYCENQPMLPIGLSDVPGEAMVKLYCPKCMDVYNPKSSRHHHTDGAYFGTGFPHMLFMVHPEYRPKRPTNQFVPRLYGFKIHPLAYQLQQKAAANFKAPVRTMSYNNGKR	0.022	5	1 (1)	1
Tt_066451-T1	Jafrac1	peroxiredoxin 1-like	197	22.1	C:GO:0005623; P:GO:0045454; F:GO:0051920; P:GO:0055114; P:GO:0098869	C:cell; P:cell redox homeostasis; F:peroxiredoxin activity; P:oxidation-reduction process; P:cellular oxidant detoxification	EC:1.11.1.15	Peroxiredoxin	MSACKLQLTKPAPDFSGTAVVDGEFKEIKLEDYKGKYLVLFFYPLDFTFVCPTEIIAFSDRVEEFKEIGCEVVACSTDSHFSHLAWINTPRKEGGLGKMKIPLLSDKSSEIGKSYGVLKEDEGISFRGLFIIDDKGNLRQITINDLPVGRSVDETLRLVQAFQFTDKHGEVCPAGWKPGDDTMKPDPKGSKEYFVKH	0.002	11	2 (1)	3	1.15597e+06
Tt_066453-T1		NSFL1 cofactor p47-like	89	10					MKLSVTKKIVPVPHLQFGQSATSNQDTLKNQQDAQNMLVVKDSEPTTSIQIRLADGSRMVAKLNHSHTVGDLRKYIVTYPFMIVTYANV	0.002	12	1 (1)	3	831769
Tt_066487-T1	BTF3	transcription factor BTF3 homolog 4-like	148	15.9					MNPEKLSKLQAQVRIGGKGTARRKKKVIHRTATTDDKKLQGSLKKLGVNNIPGIEEVNMFKNDGTVIHFNNPKVQASLTANTFAINGHSETKQITEMLPGILNQLGAESLTHLKRLADIHSAAAGSGDHGVSTGMDDDDEVPGMNIQV	0	13	1 (1)	3	1.6646e+06
Tt_066726-T1		charged multivesicular body 7-like	353	41	P:GO:0007034	P:vacuolar transport			QGQIQSLNNFIFENQRKTWFNWGADLLIRKPIRWGLNLLLSAVRWSNPTNEVFVNVMFLKGMADQVLNRCQNQIVSEWTDSILSEVELWQKCKDICPLMKTFELVLMILDKQNHLRILQHPDKEEKVIRFQSRKTNLSSPVSELEVGILNLKKVKHKLEENIEKLQEDYKGLRDEAQLAVRDKQKNKAANLLRKKKITELSMEKKQKTLENIEELLHRLQEADSENMLLKGYQTGVQILKSMFDGDLSVSNIDTTLMDLEEVLQNETEIREAMSKPFVGVSDYDTEELEVELDELLKGEQEDLTHLNKNQVNSEEELSTLITVKNHGISWPEIPTTPQEEESIIVHNKPVMLN	0.01	2	1 (1)	1
Tt_066747-T1		AH receptor-interacting -like	332	38.5	F:GO:0016853	F:isomerase activity			MWEECDKLLGFRKKVLHAGRGDAPDWQDGSKATFHFKTRRLDVEDQDKGIIDDSKKIGCPMVLLFGKKFKMPIWEQCLKTMRVGEVALFNVDKSLVDTYPIVSKGYRQYAGVAKPDDRHCSSHRCGMMAMKEGTGHSDLDQLMQKSTDLEFVIELLQLEAPGDYDKESWAMEPEEKLASVPKLREEGNVLYRAKEYKKAAEKYTEALNRLEQLLLREKPGDEEWNQLDNMKIPLLLNYSQCKLLEKDYYAVIEHTTSVLQKEPNNIKALFRRAKAHVGAWNPVEAREDFCRIMELDPSLENIVRRELQLLGKEKKKKNLEDKEMLKGKIFNM	0.002	3	1 (1)	2	167406
Tt_066750-T1		elongation factor mitochondrial	475	52.9	P:GO:0000278; F:GO:0003746; F:GO:0003924; F:GO:0005525; P:GO:0006414; P:GO:0007030; P:GO:0008283	P:mitotic cell cycle; F:translation elongation factor activity; F:GTPase activity; F:GTP binding; P:translational elongation; P:Golgi organization; P:cell population proliferation	EC:3.6.1.15	Nucleoside-triphosphate phosphatase	MAASMITSRLCVGQGIRHTLVRYLHTGDLFPKAQSRILSQRWCQFYFQRALAKTPSSPGGKKVFQRDKPHCNIGTIGHVDHGKTTLTAAITKVLADKKLANHKKYEEIDNAPEEQARGITINVAHVEYTTHKRHYGHTDCPGHADYIKNMITGTAQMDGAVLVVAATDGAMPQTKEHLILAKQIGVENIVVFINKADAADKEVIDLVEMELRELMTEIGFSGDTVPVVVGSALCALEDKNPDIGQNAVLKLVDIIDECIPNPVRDLDKPFMLPVENVYSIPGRGTVVTGRLERGTIKKGMECEIIGYNNYFKSTITGIEMFHQILEESHAGDQLGALIRGIKRDEVRRGMVLCKPGSLKAHDHIEAQVYVLSKEEGGRPRPFMNYFQPQMFSKTWDCAA…	0.002	4	2 (2)	3	947053
Tt_066806-T2		fructose-bisphosphate aldolase-like isoform X2	256	27.9	F:GO:0004332; P:GO:0006096	F:fructose-bisphosphate aldolase activity; P:glycolytic process	EC:4.1.2.13	Fructose-bisphosphate aldolase	MIFLCKIKFLIVHHLPLIGLDDLTKRCQEYKKRGALFTKWRCVLKIGDHCPSPLAIAENANVLARFASCCQQAGLVPIVEPEVLPDGTHDLECAQKVTEKVLAAVYKALNDHHVYLEGTLLKPNMVTAGQSFPTKYTPEDVAKATVTALQRTVPSAVPGITFLSGGQSEEEATVNLNAINKFPGKKPWALTFSYGRALQASALKAWLGKTDNLKAAQEEFMKRAKANGLACQGLYTAGAVQSLASEKSNFVPTHAY	0	25	5 (1)	9	354942
Tt_066952-T1	Prp19	Pre-mRNA-processing factor 19	505	55.2					MSLCCAISNEVPEQPVISPVSGSIFEKRLILKYITENGSDPISGRELTEDMLIEVRTPPVVKPRPPSATSIPAILKTLQDEWDAVMLHSFTLRQQLQTARQELSHALYQHDAACRVIARLTKEVTAAREALATLKPQAGIAAAPPGVQQPQYGAEAGGLAEQPTEEAGMTPEVIQKLQDKATLLTTERKKRGKTVPEELAKAEDVRGYKTLASHPGLHSASIPGILAMDVCPTDTSKILTGGNDKNATIFNKDTEQIIAILKGHTRKVTSVIYHPEEETVITTSPDASIRVWHVPTSQTVQMIRAHEGPVTGLSLHATGDYLLSTSTDEHWAFSDLRTGRVLTKVGDTSTPHALTSAQFHPDGLIFGTGTSDSLIKIWDLKERTNVANFPGHSGPISAI…	0	4	2 (2)	4	627193
Tt_067298-T1	LRRC59	Leucine-rich repeat-containing 59	352	40.9	C:GO:0016020	C:membrane			MAAINLKDKIDGHELDLSLNELSEVPVKELAALPKATHIDLSCNRISSLPNNFATLNHIIRLDLSKNELKELPRNIGNMTRLQHLDLYGNKLTMLPLTFCRLKNLKWLDLKNNPLEPKLKAVAGDCLDEKQCQQCAKKVVSFMQSIESDLEREKQKRLKEDREREAARKAAEEKEQERQRKLKKAEKERRRAEKRSQKERIRMEQFEKNLAKEFIDDKQTNGILPKEEKQKKKGSCLRSFVMIILLLMLSVTGYFGVLCVYMGHKIRSTDDLIYAVEDVWHFSKSKTVLWWLVLTNYCAPLWEASQHAGRNTYITLQNYAAYTWEVCGVYTDALRNALLSIIGKIYEVFREK	0.002	5	1 (1)	1	213839
Tt_067854-T1	HINT2	histidine triad nucleotide-binding mitochondrial-like isoform X2	171	19.5					MSCYRFVYQVHLLPLKSVFSTKRNSIKFFRVLKTQSCLFSRKTEMDEVQKAQNTKVEIGKPTIFSKIIKKEIPADILYEDDCCVAFRDVNPQAPCHFLVVPRKPISMLDEAQDEDCTILGHLLLTAKKVASQEKLSKGYRLVINNGKQGCQSVYHLHIHVLGGRQLKWPPG	0.007	6	1 (1)	1	129289
Tt_068371-T1		uncharacterized protein LOC111088273 isoform X3	2212	247.1					MYSSATIQTLSAPKIIEMEKINNGTKERKCYYDYYDSSRFRGLVHMIEKSDTQLESPNGMIQENVDRCYLRLSPKKDGPICVFSDLIRSMSINSTPQTEDGRLYKTVNGEKNENNFTTNCLNQDGNSTRMLFVTNTETLDTQSEVAQISECLQKYPFVLLTPLNTCNFRQYQMYFNKPFLNSESISDSVNIYTPPTDKGQLFENVTKDTQTVQMETISAVVSDVKYTNKTCLPTTTSIDNDQTLPLVIADVRGDAKDVFNEKNPIKYNYSENSNSFDSSLVGNNVVESFYTLLEAIESNKGTASSVYRNSSPTKMNSEGVVSLMGDDVTGPEDFVCDDIGDDGVFPDSSDAAALTSGNKRECVEEEKSTVTTSSASSNQKYNDDPSVSSNYNLLETNNQ…	0.028	0	1 (1)	1
Tt_068506-T1		---NA---	80	9.1					MPLRKREIPICASADWLTSTDDVTMDSSTYPTIKLYVTSKKKTGETSVGIKVNVQRQIRCVFRKLGQALKEQWGFSGEVF	0.036	9	1 (1)	1	45040584
Tt_068803-T1	RpL28	60S ribosomal L28	137	16.1	F:GO:0003735; P:GO:0006412; C:GO:0022625	F:structural constituent of ribosome; P:translation; C:cytosolic large ribosomal subunit			MSADLQWMVLRNCSSFIVKKRNIKKFFSREPLNPKNIHSPRYTGTIHKKALTVEPHPGGKGVNLVYKKRKYQKRPDKNIARIQFTRDARRTMTGIKKFVNSNRYRRDLKMLALRRASAILRSQRPVLPKKGQRKKAD	0.002	12	3 (3)	4	332926
Tt_068842-T1		formin-binding 1-like isoform X1	574	65.2					MNWGVELWDQYDNLGAHTQRGVDFLDKYGQFVKDRCSIECEYANKLRRLVKNYQPKKKEEEDFQFTPCKAFLQMMNEVSDIAGQHELIAENMTIQIVKEINNLVKELKDDRKRHLHEGAKLQAQLQASLSQLDKAKKAYEKAFKEAEKAQENFLKADADLNLSRAEVEKARTLSVMKSQACEDCKTEYANQLQKTNELQRQHYTTTLPKVFQQLQDMDERRITCIQNFIKLSADIQRQVFPVVSRCLDGMVKASETVDPGQDSRLVIEKFKSGFSPPVDYPFEDLSNFKNGEGNTGLHPVPSFKTETIKGTITAGKLKKRSGLFGIFSSNKHHIDDTKDYCDLPPNQRKKKLTQKIEYIQNQIQQEAAARDGLMKMKLVYEQSPAMGDPLSIEGQLTEC…	0.022	2	1 (1)	2	228314
Tt_069353-T1		talin-2-like isoform X2	2557	274.3	C:GO:0001726; F:GO:0005200; C:GO:0005623; C:GO:0005856; C:GO:0005925; P:GO:0006897; P:GO:0007016; P:GO:0007155; F:GO:0030276; F:GO:0051015	C:ruffle; F:structural constituent of cytoskeleton; C:cell; C:cytoskeleton; C:focal adhesion; P:endocytosis; P:cytoskeletal anchoring at plasma membrane; P:cell adhesion; F:clathrin binding; F:actin filament binding			MANLSLKINVVEKNVIKTMKFKPSMLVYDACRTIREKISEANFGESKEYGLFLADEDPKKGVWLESGRSLEHYLLRDGDLLEYKKKTRTLRVRMLDDAVKTLRVDDSQPVANLMVVICTKIGITNHDEFSLVRELTEEPVKDASTTGTLTLRREKKDKDRDQKMEQLKKKLKTDDDLNWVDHSKTLREQGISQEETLLLRRKFFFSDQNVDSRDPVQLNLLYVQARDAILNGTHPVTIEQACKFAGIQCQIQFGDYSELKHKPGFLDLKEFLPKDYWKIKGIEKKIFLEHKTCLRLSEIEAKVKYVSHARSLRTYGVTFFLVKEKMKGKNKLVLRLLGVTKDSVLRLDEKTKEILKTWPLTTVRRWAASPNSFTLDFGDYSDAYYSVQTTEGEQISQLI…	0	3	6 (1)	8	801606
Tt_069364-T1		heterogeneous nuclear ribonucleo 27C-like isoform X1	458	46.2					MADNEEAGKLFIGGLSWETTQENLETYFSRFGEVVDCVVMKNNETGRSRGFGFVTFKDPNCVSIVLASGPHELDGRTIDPKACNPRGMNKGNMKKGGNFPKVFLGGLPSNCTETMLREFFSKYGKVMEVVIMYDQERKKSRGFGFLSFEKEEYVHRVCADHYVTINGKQIECKMAEPREMSKSAKASQQGNQDISPWGGPGMGMGASHGGWGPGPMGGAGGTAGGPGMGPGGPSGTMGPNMGGMGNMGPMANGMMPGGWGGPQQTGPYGAQGGWGPAPGGYAGYQGWGASPTGFGPYGGPGTQYGQQGYGGFGTGAPGFGGYGGFGATMGAAPGPGGPVAGQTPSQMYGQAGPNAAAATPGSVVPPGTQNAAGGTGAQGPPSAGVKQEYNSPYGAMGNY…	0	8	2 (2)	7	1.57584e+06
Tt_069454-T1	CCT5	T-complex 1 subunit epsilon	541	59.8	F:GO:0005524; C:GO:0005737; P:GO:0006457; F:GO:0051082	F:ATP binding; C:cytoplasm; P:protein folding; F:unfolded protein binding			MTAVGHLAFDEYGRPFLILKDQERKKRLVGIEALKSHILAGRSVANTLRTSLGPKGLDKMMVSPDGDVTVTNDGATILKMMDVDHQIARLMVQLSQSQDDEIGDGTTGVVVLAGALLEQAEQLLDRGIHPIRIADGFEMAARCAMDHLEKISDSFSVDKNNLEPLVQTAMTSLGSKIINRFLRQFAEIAVNAVMSVADLERKDVDFELIKVEGKEGGKLEDTMLVKGVVVDKDFSHPQMPKELRNVRLAILTCPFEPPKPKTKHKLDITSVEDYRALRKYEQEKFQEMVQQVKDTGANLAICQWGFDDEANHLLLQKELPAVRWVGGPEIELIAIATGGRIVPRFSELTPEKLGKAGLVKELSFGTTKDRMLAIEECHNSRAVTIFIRGGNKMIVEEAK…	0	7	3 (3)	4	1.35112e+06
Tt_069459-T1	Zn72D	zinc finger RNA-binding -like isoform X3	1016	113					MATNNYYTFTTGGVQFGTAQAATFQTSPTATPATGYAVQHPAAAVAQPPFTGTATAVAVAAAARTIPTGYETYQPTTAHTNTTYPYASRQQTTYDKVQNYYPQAAQVGYSPTNTATAAYQTGMTSNIVYGYSSGTTAYAGVKNKTVFNKSPRAGNTFVQSLVTAGKPSYSTNTAYASQRQPQKTQNVPAGSISSYAYTTNTPGVSSSYSTFNTGSSGNYTTRTPVYGHQQQTAQSSTPLAANTTTNQQNTTTSNLQPSKVHSNNWSGFKRVPMRFQKQKAAPKPEQLHYCEVCKISCAGPQTYREHVEGQKHKKKEASSKQGNNIVPNPRGGTSLRCELCDVTCTGADTYAAHIRGAKHQKVVKLHTKLGKPIPSADPVVISTNSITQKGIKGGDGDSA…	0	4	2 (2)	3	117095
Tt_069469-T1		---NA---	73	8.2					MCGIIVVKEGCPKMKQKVISKVEKIDAPGLSRVKEIKPMTELAKEDNEKIMAREGEELNVVIICPKVELKNKR	0.023	10	1 (1)	1	228540
Tt_069612-T1		tenascin-like isoform X4	2098	235.1					MLHILPAYLYFFLCCSFVVGQFDSNFTLQNVWGRLPSETSRSLIQCVSSNGQPGKIKFGRSIDVGEGLKLPKFTQQFLQGAPVHARILFMPGGDELSRFGAFHCEVTNGGVKTKITTLKLPPENIAEFEPEEPYIVANQGDDVYFAMKKVITKNLPLRWRHNGGNIIEKWNDQLNVSIPSVTVTDAGIYECYYEGRRNEHVHGILRLIVRGCPSGKYGQLCDQDCPPCYNGGICHDRWGVCVCPPGFTGSHCEKACGGNLFGAECSKICTSGQHVDRGCAIHLFCKPDPYGCSCAPGYKGPICATECKPGWYGADCKQPCHCANGSKACNRITGQCNGSCSNGWIGESCQIRDPSVPFLPNITSINCPVGKFGVICDQECHCRDNEACDSLSGTCPGEC…	0	1	1 (1)	3	274796
Tt_069708-T1		alpha-crystallin B chain-like	193	22.2					MTSSERKLPILKTDSHIIDQEFSSVRERFDAEMKRMEEEMNKFRSQLLDRERDSFTSTSQTQRTSTTHTSTSSNEGTTHKSELRTWLDGLKSPLIQEGEAGKELKLRFDVSEYNPEEIVVKTVDNRLQVHAKHEEKSECRQVYREYNREFLLPNGTNPEMIKSSLSKDGVLTVEAPLPALEGSQERMIPIHSA	0	15	2 (2)	4	543988
Tt_069877-T1	Pp2A-29B	serine threonine- phosphatase 2A 65 kDa regulatory subunit A alpha isoform	589	65.4	C:GO:0000159; F:GO:0004722; C:GO:0005737; F:GO:0019888; P:GO:0043666	C:protein phosphatase type 2A complex; F:protein serine/threonine phosphatase activity; C:cytoplasm; F:protein phosphatase regulator activity; P:regulation of phosphoprotein phosphatase activity	EC:3.1.3.16	Protein-serine/threonine phosphatase	MAASEANTDDSLYPIAVLIDELRNEDVQLRLNSIKKLSTIALALGVDRTRTELIPFLTETIYDEDEVLLALAEQLGNFTPLVGGPEHVHCLLPPLESLATVEETVVRDKAVESLRNISQQHSTADLEQHFVPLVKRLASGDWFTSRTSACGLFSVCYPRVSGAVKADVRNHFRNLCQDDTPMVRRAAASKLGEFAKVVEPEYMKSDLIPMWANLALDEQDSVRLLAVEACVSIADLLQQEDVEHLVMPTLRQAAEDKSWRVRYTVADKFTELQKAVGSELTKADLVPAFQNLLKDCEAEVRAAAAQKVKDFCQNLPKDVQEQVIMNNILPCVKDLVSDPNQHVKSALASVIMGLSPILGKHNTIEHLLPMFLSQLKDECPEVRLSIISNLDCVNEVIGI…	0.002	2	1 (1)	2
Tt_069973-T1	RpS17	40S ribosomal protein S17-like	131	15.1	F:GO:0003735; C:GO:0005840; P:GO:0006412	F:structural constituent of ribosome; C:ribosome; P:translation			MGRVRTKTVKKASRVIIEKYYTRLTLDFHTNKRICEEIAIIPSKKLRNKIAGFVTHLMKRIQRGPVRGISIKLQEEERERRDNYVPDVSAIDLDVIEVDPDTTEMLKQMDMDKIPGLQVASLLPFRGGPRA	0.002	8	1 (1)	4	896373
Tt_070049-T1		integrin-linked kinase-like	154	17.4	F:GO:0004672; F:GO:0005524; P:GO:0006468	F:protein kinase activity; F:ATP binding; P:protein phosphorylation			MGQDFRKIGFKDQSWLGTKTRSRDATLSRHSGIGANELNLKVKLASTLSGETWRGTWQSNDIVAKILRVHEITARVLRDFKEEYPRLRIFSHPNILPVVGCCSSPKNLIVVSQYMPYGSLYTVLHEQTGISFLCNSIFTDLQELDYAHGFSSIS	0	8	1 (1)	1
Tt_070281-T1	RpL7A	60S ribosomal L7a-like	228	26.5	C:GO:0005840; P:GO:0042254; C:GO:1990904	C:ribosome; P:ribosome biogenesis; C:ribonucleoprotein complex			MVQKKIKGKKSKKKVASAPLATKKTEVKKVVNPLYEKRPRNFGIGQNIQPKRDLSRFVRWPKYVRLQRQKAVLYQRLKVPPPINQFTQALDRQVATQLFRLLDKYRPESKQAKKARLRQRAEDKAAGKEDVPTKRQLVVRQGCNTVTSLIEQKKAQLVVIANDVDPIELVLFMPSLCRKMEVPYCIVKNKSRLGRVVRRKTCSCLALTQVKSYVLVHKRKKTSIYWSL	0	24	6 (6)	19	1.18782e+07
Tt_070429-T1		far upstream element-binding 1-like isoform X1	528	55.5	F:GO:0003676	F:nucleic acid binding			MSVAPPQSTVSGGFDTNSAFADALERARQIAAKINPGGGGGDTGGTKRPLEDNMDQLGDGSPDPKKLASVKDPIGAQLAAIHQQRPIPGSNTVTVEEWKVPDKMVGLLIGKGGEQISRLQAESGCKIQMAADSGGTPDRSCTLTGTKQSIDRAKELMGQIISRGGPPPANLDVNQVPEGQVVIDMIIPGGKVGLVIGKGGETIRQLQERACVKMVVIQDNPQQTGMDKALRISGEPSKCEFAKQLVMDLLTEKEIQNANRNGTFMGGGPPTNDYGSAPPGAQEILVPRQAVGVVIGKSGEMIRRIQQDSGGAKVQFQQGKDDGPGDRICLVSGNPEQAQRAANIIHDLIHSVLMRDQQNVGRGRGRGYDGGPGGPQFGPPGPGMGRGRPDGDMQEITYS…	0	15	6 (1)	18	534231
Tt_070517-T1		muscle calcium channel subunit alpha-1-like isoform X3	244	27.8					MPLVPRGEELSLFEEDVTEVVLEYFVLSQSLLEAGLQVVLNSILRSMVPLLHIALLVIFVIIIYAIIGLELFSGKMHKTCFDRITKEIGLEDPHPCSFGSSGFHCSEYNEHLVCREYWDGPNDGITNFDNFGLAMLTVFQCVTCEGWTDVLYDINDAVGNEWPWIYFLSLIIIGSFFVLNLVLGVLSGEFTKEREKAKARGDFHKLREKEQIEDDLRGYLDWITQAEDIDPDEKEESKDSIHGK	0.036	2	1 (1)	1	1.15243e+06
Tt_070670-T1		muscle LIM 1-like	141	15.7					MEICLFRQRHTLKHLIVYESNLVKVFFIKNTKSSVHFSFNSSIIMPFKPVEHPKCPKCGKSVYAAEEMLAAGQKWHKTCFKCGLCQKRLDSTNAAEHGGELYCKQCYGRKFGPKGYGFGQGAGTLSMDTGAHLGNIGTEMT	0	10	1 (1)	3	690593
Tt_071286-T1	ACOT13	acyl-coenzyme A thioesterase 13-like	154	16.3	F:GO:0047617	F:acyl-CoA hydrolase activity			MATVSKLRLLKDVLKALIDGPGFDKVVSTLNVVSCGGGKCLCEMKVEDNHQNRGGTLHGGMTATLVDVVSTLNLIGEKEMAGVSVDLNVTYLKGARVGDELQIESSLLRAGRSMAFLSVDIRNKETGLLIAQGRHTKHLGAGIIEKSTSSNPQG	0.011	6	1 (1)	1	311932
Tt_071400-T1	ATP5O	ATP synthase subunit mitochondrial-like	240	26.4	P:GO:0015986; F:GO:0046933	P:ATP synthesis coupled proton transport; F:proton-transporting ATP synthase activity, rotational mechanism			MLAALPALDVRMTSTPIYFSQLVENKIMAASCKVVSLPWIRHFSTSSASYTKLIKPPVAIFGIEGRYATAIYSAAVKEKKLDAVEGELKKVKSLMQKDVKLAEFITNPLVKASFKKDGLVSTLQKQKFSDLTINLIGTMAENRRLNKLDAVINSFNRIMSAQRGEVACSVITAKPLDNTTVKDLETALNGFLKKGETLLMQTKVDPSIIGGMIVSIGDKYVDMSMATKIKTYTQLIKEAI	0	18	4 (4)	9	1.08089e+06
Tt_072347-T1		probable methylmalonate-semialdehyde dehydrogenase [acylating] mitochondrial	525	57	F:GO:0004491; P:GO:0055114	F:methylmalonate-semialdehyde dehydrogenase (acylating) activity; P:oxidation-reduction process	EC:1.2.1.27	Methylmalonate-semialdehyde dehydrogenase (CoA acylating)	MITMEVRGPFFKRLFLSFGQRAFATSTVPTTKLFINGKFVESSASKWIDVHNPATNEVVTRVPICPKEEMEEAVASAKAAFKSWSKTSILTRQQTMFRYQSLIKENMKRLAASITEEQGKTSVDAEGDVFRGLQVVEHACSVTSLQLGESLPSIAQNMDIHSYRIPLGVCAGVAPFNFPAMIPLWMFPLALVCGNTFVLKPSERDPGASMILMELLKETGVPDGVVNVIHGQHEAVTFICEHPDIKAISFVGSDQAGKYIYERGSKNGKRVQSNMGAKNHGVIMPDANKEHTLNQLVGAAFGAAGQRCMALSTAVFVGEAKEWLSDLVEKAKSLKVNAGHIPDADLGPVISPQAKRRICDLVQSGVDEGAKLLLDGRDIIVPGYEKGNFVGPTVLSDVK…	0	10	3 (3)	3	269634
Tt_072595-T1		kinesin light chain-like isoform X2	649	72.5					MSETIKAYRLRKIESIGKMTAMTQEEIITNTKTVLQGLEALKNEHNSIYNGLMSSLKAVQQENGDSNLMEEKANIIKKNLESIDLGLGEAQVMMALASHLQMVEAEKQKLRAQVRRLCQENAWLRDELASTQQKLQASEQMVAQVDEEKKHLEFMNSLKEYETNESAMNESGSEKKPSSDAPLDLGFPDDDDDNSHNDAVSPTPSNQMSASMTASTHAGYEIPARLRTLHNLVIQYASQGRYEVAVPLCKQALEDLEKTSGHDHPDVATMLNILALVYRDQNKYKEAANLLNDAVAIREKTLGENHPAVAATLNNLAVLYGKRGKYKEAEPLCKRALDIREKVLGKDHPDVAKQLNNLALLCQNQGKYEEVEKYYQRALDIYENTLGPDDPNVAKTKNN…	0.002	3	1 (1)	1
Tt_073226-T1		Rho guanine nucleotide exchange factor 26	1783	201.1	F:GO:0005085	F:guanyl-nucleotide exchange factor activity			MLEIMKNSYVSGLSSCVENVIKPAIFNCPGFTSGKEKTIQSSETSSFQPSRIICRDLVTTQCSSKCECSKHEQNLSVKVKSKCEENLISRTKTMSLGQQVGKCKEKHKKVLSKSTTGSNVDPVVLTEPEMEKCCCDSSETDTNRKPVRVPKWGKVCSLDSSDKWSQIKKKFESESVSSETLVTFKIPTENLPRNSLNATKQRYSKSKLQDRSTLDARINQNGCSSENHSQEVFRGLYKSQSESGVFKTVHTPYSLPTEFVRSKSLSTRGPNKSFKNQLGDSKAALNKSSEYVQTLRATETSQTPNKISQSVDNSDVNCSYLLQCHLKNKAENTSYNGNIPGVVDSNSITEKTCPSVSGESGGCVQTQTSIINNVDTNTNSSKSVSLPFSYGFKIFQKSK…	0.041	0	1 (1)	1
Tt_073237-T1	HPX6	serine arginine repetitive matrix 2-like	884	100.8	P:GO:0000723; F:GO:0003677	P:telomere maintenance; F:DNA binding			MLKHSKVLFVKANGTPMQFYMRPSTEKEKLRPLIEHGGGVVTSKLTSDAYKLVEPGSRVLTCDENTVRSKYIVDCVEKNTLLNIEDYVIKMETEEVSDISDTESNNMNNKNEFILRTKAKNTRSRKEYSVEDQQAIINFICTKNRYTEIKGTRLWKDMEFRNVLPDRTWQSMKEHFLKQIYPKLKDFNLSTSQIQKFMQSKNEKGYLSRENLKLHNISKEFPEADRESLAGSVFSLGDKNCYTVEEDQKIIDYIFEDGSIAYRNVKGTVIWKDMERISLTNHTWQSMKERFLKRIVPNISKYRISPTHLRRLSTVVDITHLPKLMTETIKKQKAQTSSNEKTVISESEDKTRNITGTVDKKLVLERVGKVSSKECSTDTYPVNNKENSQTPVYSVSETA…	0.022	1	1 (1)	1
Tt_073311-T1		stromal membrane-associated 1-like isoform X1	387	42.4					MANKADKEKQKQIQEKCQTILCQLLREEDNKYCVDCDAKGPRWASWNLGVFLCIRCAGIHRNLGVHISKVKSVNLDTWTPEQVGLLQEMGNSRARAIYEANLPDNFSRPRSDSLLETFVRDKYEHKRFIAKEWVPLAVSKLVYKVEEEKIDRKQHKSKAVENVENLVLQQPIAVPRPHGTTNINAITRKTTPSPKPQTQQSSTVESSVDLLCLDVPKSDTASDDLLGLGVPKTDTANDLFDCLVSATTAASNQKNNVQSTGIAEKDFFGQEAPVEPRDKIILTKESILSLYTSGSTNGSWPSFGMSGMYALPPMYQTNTMMGGIPSGGVLSTSNTMIGFPLQNNCLPQTVHSTNPFGSLGIGPQGGAVWNRGLSNPVQGTPRLGQVS	0.003	3	1 (1)	1	142994
Tt_073429-T1		ATP synthase subunit mitochondrial-like	103	11.4	C:GO:0000276; P:GO:0015986; F:GO:0046933	C:mitochondrial proton-transporting ATP synthase complex, coupling factor F(o); P:ATP synthesis coupled proton transport; F:proton-transporting ATP synthase activity, rotational mechanism			MSKAITSLVSKAPTLAKGFLDSSRPKLNTFLKYARVELAPPKPSEFPQVLQGFNSLMNSARTGSWKKIPVREAWLNTLIALEISFCFFIGECIGKGTIIAYQV	0.016	8	1 (1)	1	232750
Tt_073500-T1		MON2 homolog	322	35.7					MNFVPFGEKALEMVVALYQETAAWTMVRESSVLHSIIKTLRLPLGMKYSCPSQSTWKLAVDAFLKVLHVGLPLAQNHPSQFKGMWCDLGAAIEDFLFSNSLASPTQSLEDQQCDEALDCKVVQLIREEILPQAKHIPKDFILKIVSLLNKGSIHSATGSPTVDTESSRKLREEFAKSCFETLLQFSFLSGTADTEPLEGSTLHGGVVNKLAVTSLLHRFQEVIKKYVEDERLSGKCPLPRHRMAEISFVLKAVATLTSSLKKAPAENVEWSVWQQLIGLYPHLVDCTTSTSAQVCRSLREALHEYVSLLSPPHGQVINGNSS	0.04	2	1 (1)	7	2.52243e+06
Tt_073556-T1	COPG1	coatomer subunit gamma-2-like	815	91.4	F:GO:0005198; P:GO:0006886; P:GO:0016192; C:GO:0030126	F:structural molecule activity; P:intracellular protein transport; P:vesicle-mediated transport; C:COPI vesicle coat			MYVLKRDKKDEENGGGGNPYANLEKTSVLQEARTFNETPVNPRKCGQILTKVLYLLNQGEQVGTTEATETFFAMTKLFQSKDPVLRRLVYLGIKELSRVAEDVIIVTSSLTKDMTGKEDQYRASAIRALCKITDSGMLQAIERYMKQAIVDKNYSVSSAALVSSLHLMRVSPDVVKRWVNEAQEAVNADNVMVQYHALGLLYHIRRSDRLAVSKLVTKYARFALKSPYAVCMLIRIASKLITDDDAGPDSPLFEFIENCLRHKSEMVIYEAANAIVNLKSTTPRELAPSISVLQLFCSSPKPTLRFAAVRTLNKVSMSHPAAVTACNMDLENLITDVNRSIATLAITTLLKTGSESSVERLMKQISSFMSEISDEFKTVVVQAIRSLCQKFPRKHTVMM…	0.023	2	1 (1)	1
Tt_073816-T1		probable splicing arginine serine-rich 6 isoform X1	278	32.5					MSGRYQLFIGRLPLDVRERDIENIFEKYGRLLRCDVKYGTGMAYAFVDYDDRRDAEDAIKYENGRELRGQSIVVEWARGPSFRPSSYAMKSGGGRSHSIYDECYHCRHSGHWARDCPELERDRFYRRRYWSRSRSRSRSHRRKSYSRSRSKSKDHRPRQKKSRSRSQSHERNKPNRSRTRSRSSSGSRSRSHSRDGGDDKERNRSHSASKSHSRSPESEKHKSKSPSAEKGNDATDEKDGRKWNSKDKSPSRSRSPVVSPKAHPEEEPNNNDDDDDDV	0.002	4	1 (1)	1
Tt_074130-T1		basic proline-rich -like isoform X2	347	36.9					MGDLLPRGGGPIRGRGFPRMSRGGPAGRGRPPRGGMFPPRGRGGPPGGPVGRGGPPTRGRPPLRRGLGGPPGVMRGRAPRGDGTLGRRPWGGPPLGRGGPPSKRGRWEESGGYPSYDSSEYPSNDYGMEGGDFQNPSGYGSSYSNPDGYRDSYDQPQQGTAPYSKPDDPYQRRTLSSDPYGYRAPQSESYTRSDSYSRSQPPADPYGRPAPPQGSYTRSAPHSYGRPAPTEDPYARPGPTDPYGRPPPADPSARPAPPADPYARPAPPADPYARPAPPADPYGGPIPPDPYARPVSSDPYAKPVPPAYSQSTGYGYNTGMPGGEDHYWNNSGVSKASSYQQYDYNTY	0	9	2 (2)	4	2.52233e+06
Tt_074234-T1	TTC5	tetratricopeptide repeat 5-like	439	49.9					MNPDKLNEEFLAKITDAVSNLYHFRDHYFDNHPVKEATAKITDISKELEKTLQLLDEQKEECEKFDKAKYLMLRGRALNVTSEYSPEAFEVLSRAVKFNPKLVEAWNELGECLWKKGDVHGARNCFERALKQCVNKTSLRNMSMVLRQISQEPKEKVQSIHESVVKAKEAVQMDLEDGLSWYILGNAYLNLFFVADQSPKILRQSMSAYSRAMSDPAARSNVDLHYNRAVGLKYDEAYKEALESFEKAASLDPLWPEPVKNIEKIEKYLQQTQQMVHNKGNQKARKLQNFLKSLKPHHLGPYGKDGSSSSTGKRHNMFQHIKLCQLLPGVNQGKVVLGKVVGNIVTEDEVPFSFCLVDEDESCVSVTVYNIAEGKGVIIGDSVAIPDPEVHSVDFKYKD…	0.015	4	1 (1)	1
Tt_074371-T1	RpL8	60S ribosomal L8	261	28.9	F:GO:0003735; C:GO:0005762; P:GO:0032543	F:structural constituent of ribosome; C:mitochondrial large ribosomal subunit; P:mitochondrial translation			MGRVIRSQRKGAGSVFRSHNKHRKGAPKLRAVDFAERHGYIKGIVKEILHDPGRGAPLARVIFRDPYRYKLRKELFLAAEGMYTGQFVYCGKKATLQVGNVLPVGTMPEGTIVCNLEEKTGDRGRLARCSGNYATVISHNPETKKTRVKLPSGSKKVLPSANRAMVGIISGGGRIDKPILKAGRAYHKYKAKRNSWPKVRGVAMNPVEHPHGGGNHQHIGKASTVRRDTSAGRKVSSLNITSNVNIRILYYNIYGIQRCEY	0	10	2 (2)	3	96423.9
Tt_074651-T1	Cox4I1	cytochrome c oxidase subunit 4 isoform mitochondrial-like isoform X1	179	20.8					MASNLLKVPIFSKLPSLAPRIIVPSATYHKERIGNREVVGFGLNGEPSYIDRTDFPMPAIRFKENSQEITALREKEKGDWKTLSMDEKKMLYRASFCQTFSEMKAPTGEWKSILAGTLVAMSLTVWLYVWMKKYVYQPMPDSFTPERKAAQLKRIVDLRMNPIEGITSKYDYENNRWKD	0	20	3 (3)	3	847425
Tt_074887-T1		---NA---	395	43.6					MREQALDNQHVKCWRQLVALTNLMQDGKGGRQVPVNQESARSGCIQGLHIAYENWREATPLQNNPQKPMVNSIESSPSLTREMGHHEERSSDWLESLQIRVISPSSVPGGRDPAARETLRSLTKEVPSTYHTWLTLTKQHGPNSQSTLTQGDWFHQLYVKGRVKGGHKQSNVIPQPLVHGRGHKQTAIVAEARVQNVGDRINVQEDPAICRSATKQGSKDVLLALQGQAAGPRKPHTSLPQQGGRCLLENCLSIPGDRFDTTEHPNKGKQNVSNPIIGKEGDFEPPHIGAPKNGDKILEYGEICPLVRHSTRDIPNPMNSSPAEALLQARCHMELVKATRNDLTGPGSHKSKPMQCTPDIRKRVTHPPQTPQPLQTTNEEELLSPPSSLSPFWAA	0.029	3	1 (1)	1
Tt_075808-T1	IMMT	MICOS complex subunit MIC60-like	720	81.7	C:GO:0110165	C:cellular anatomical entity			MLRVSSKSAINRIKSTSTSSLKKSVFRAQSTDISHQRKRGGGTKIVLTFLGGSILAAGGAAAYAKYDPKFQNTLEQNLPYAEEIFRFIPEWKTPPYVHQEERPEQAVKEVKDKGLVAKKLERDNTKKQETSMLVSDTTKQPATEEKAKNISVSKTQPKAQPSEKEISVEKKLDDQRAKEEKLLQKEADIISMNAALQQKLEERLQSLEKLLKDAVTAEGEAVEAVRIHTQKLYTALNETLDVEENRVWDDISAANVVRDAAISKASTIASDVKTAAEELRSTISEGRANKYTSQNPSLLPAEERVSKILYQVQSAETEMARALGEARVVNEYKDIIEKGKEKFKKELEAALPDVKLGEKGHKLTEEELNFLIAHAHRRVEQLQRRLAKQMVTEHERIQK…	0.003	1	1 (1)	1
Tt_075826-T1	SNRPG	probable small nuclear ribonucleo G	77	8.5	P:GO:0000387; F:GO:0003723; C:GO:0005682; C:GO:0005685; C:GO:0005686; C:GO:0005687; C:GO:0005689; C:GO:0034719; C:GO:0043186; C:GO:0071004; C:GO:0071013	P:spliceosomal snRNP assembly; F:RNA binding; C:U5 snRNP; C:U1 snRNP; C:U2 snRNP; C:U4 snRNP; C:U12-type spliceosomal complex; C:SMN-Sm protein complex; C:P granule; C:U2-type prespliceosome; C:catalytic step 2 spliceosome			MSKAHPPELKRYMDKKLSLRLNGARTVTGILRGFDPFMNLVIDEAVEETKGGEKHNIGMIVVRGNSIVLLEALDRVG	0	18	2 (2)	4	444706
Tt_076018-T1		---NA---	175	19.9					MTAINRKLLLKSASAIWHSDLDIIHHMRTLFGTVSEVLALQTQTRYNDTELAITWTIKASTENNISNNSDSDSEEIDTGTGSYVQGHEYSDPVVSREEQTAEQESANSELEDVLPQPAKSQAEFDTLNFKLEDQDFFKRVVLSLHISVGRKHTRWPIKKTDVHIIEDAIVLEMFQ	0.042	6	1 (1)	1	660215
Tt_077007-T1		THO complex subunit 4-like	230	25.3	F:GO:0003676; F:GO:0003723	F:nucleic acid binding; F:RNA binding			MTDKIDMSLDDIIKQDRSKFRIRGRGGERGGRDRGARPNSGGGRRWTGSDGGFRNRQTQGWSRPLPYSRPKQLPDKWQHDMFDGGVEGGVVRELTTGATKLMVSNLDFGVSDADIKELFSEFGALKKAAVHYDKSGRSLGTADVVFEQRSDAVKAMKQYNGVPLDGRPMSIQIVTSITQRGAISSRIGSAVRGERGRSRGQGRGRGGQNRKLPTAEELDAELDAYVNKMD	0	15	2 (2)	4	925747
Tt_077009-T1		coagulogen-like	86	9.7					MHRYVYAMNRKILGLLGENGVSSEVQAKIENDLEQALKLNGTEQDEASISGRGNSRLLRILRLSNACDTHTCRFGSNIHRCDYLPP	0.009	8	1 (1)	2	5.13822e+06
Tt_077156-T1	RpS27	40S ribosomal S27	84	9.4	F:GO:0003735; C:GO:0005840; P:GO:0006412; F:GO:0046872	F:structural constituent of ribosome; C:ribosome; P:translation; F:metal ion binding			MPLAKDLLHPSPEEERRKCKLKRLVQHPNSFFMDVKCPGCYKITTVFSHAQTVVLCVGCSTVLCQPTGGRAKLTEGCSFRKKQH	0	30	3 (3)	16	2.68214e+06
Tt_077285-T1	Fas1	fasciclin-1-like	562	63.8					MLSRTLWNAISQPQVVRAPLVGNHCRRGKSDESLSCPYCLGEYFVNNAKITEERHYSVNDGKQVLYIIDEVLEPYSSNTHLPPNAWEFLIQPTTYNLTENLGAFASRVRSEDVTDLFTDVGNHTYFLPVGEGNDQNLNRLRDIDSKVIKGHIIPKKVLFTRTMGSEPYRTYAYDPVELRVELSLVNQTDNLGKGNVLYAQSNTLQSDHRHRKGVVLSKIVRPNIPVKNGVVHLIEAPLMIINITIWDFIQREKDGRLSEFLGLVNSTPEFRYELFNAQEKTVFVPTNKAIQRLEKVQSLKGNITAITNLLRLHMVMQSVSSDDVRNGRVKEHLAADNRRSLYFRVVGEDRNRTLTVEGGGVNATAVQADIGATNGIVHIIDRVLGMPYQTLNEKLAADP…	0.008	2	1 (1)	2
Tt_077394-T1		---NA---	187	21.4					MEDIDQCVRASGALVRRLMVNGDTCSSYSATRKGCGESLSGTDIKQLYTYSSFNKRAEFWIWGSMVYVPFTKRKNLFLILGSQFHNKTIKFPLLSLLDICLVPRSVTYRQTSGRKTGLNILNTAVSHRLYCHRTVLMRTVKSVTWSCKKIQFFFKKNHNPAKYLVCSIVFDKEDICNDIAEVLKAEM	0.04	10	1 (1)	1	4.54597e+06
Tt_077606-T1	Uqcrc2	Cytochrome b-c1 complex subunit 2	461	50.2	F:GO:0003824; F:GO:0046872	F:catalytic activity; F:metal ion binding			MSTSKLFNACFFRNSSYRAYSAQAFAAAKSGQKSDHVILSKQDAKTSTLSNGLIVASVENYSPVTRLGVFVKAGARYESGENVGITHCLRNSAGLSTKNLTVFGITRNIEQMGGNLAATSSREHMVYTLDCIRDNLEKGLWYLAEVTSQHVFKPWELGDFASRMKVDLTLFKDQPQAVLMEALHQAAFVGGLSHSLYSPDFMIGKHNSEMLQSYVKDTFTAERATVIGLGVDHDLFVEQVENLFHFENRRGSIDVGSSKYGGGEVRLEFPGPVSYAAVVAEGASLTNLKEMLCLALLQRILGVAPSVKYSEGLHSKLGSAGAKVTNEPFAVSSLNVSYSDSGLFGFVVAGQHSCMDKLLKSLVTEMRSTVKKVTDQDLMNAKHQLEATLNMAQENQADI…	0	9	3 (3)	4	557887
Tt_077652-T1	RpS2	40S ribosomal S2	278	30	F:GO:0003723; F:GO:0003735; P:GO:0006412; C:GO:0015935	F:RNA binding; F:structural constituent of ribosome; P:translation; C:small ribosomal subunit			MADSAPAVGRGGFRGGFGAGGRGRGRGRVRGRGRGRGRGRGKEGDKEWIPVTKLGRLVKDGKIKSLEEIYLFSLPIKECEIIDFFLGSALKDEVLKIMPVQKQTRAGQRTRFKAFVAIGDYNGHVGLGVKCSKEVATAIRGAIILAKLSVIPVRRGYWGNKIGKPHTVPCKVTGKCGSVLVRLIPAPRGTGIVSAPVPKKLLTMAGIEDCYTSARGSTATLGNFAKATYLAIQQTYSYLTPDLWKENILTKSPYQEFTDYLMASQKAVGAARQEQPAY	0	34	8 (8)	27	7.607e+06
Tt_077710-T1		signal recognition particle 19 kDa	148	17	C:GO:0005786; P:GO:0006617; F:GO:0008312	C:signal recognition particle, endoplasmic reticulum targeting; P:SRP-dependent cotranslational protein targeting to membrane, signal sequence recognition; F:7S RNA binding			MAVSSWSPDKKYSDKERWVCVYPAYINSKKTIFEGRRLPKTKCVENPTYQEIRDVLDSAGFKVGVENKLYPRETNKDELIYKGRIRFQLKKDDGSPVSIKFPTRKSVLVYLCEMIPKLKSRTQKQSVGDQSHSMQGGGKKGKGKKGKR	0.002	11	2 (2)	4	430277
Tt_077804-T1		serine arginine-rich splicing factor 1B-like	219	25.4	F:GO:0003723	F:RNA binding			MSYRNNDSRIYVGNLPPDIRTKDIEDIFYKFGKITFIDLKNRRGPPFAFVEFEDTRDAEDAVHSRDGYDYDGYRLRVEFPKGTNPGRGFGSRGRGRGPPARRSQHRILVSGLPATGSWQDLKDHMREAGDVCYADVSKDGTGVVEFLRYEDMKYAVKKLDDSRFRSHEGEVSYIRVKEDYYGRSRSRSRSYSPRRSRGSPTYSPARRSHTRSRSRSYSK	0	18	4 (1)	10	157637
Tt_077811-T1		---NA---	244	28.3					MVSLLYCVIEDLWFVHRYRKTKNRAPHTGATENWWSNPTIRADNESPRVCVYKFTFKVNQIKQTKNITYQQKHVFNQKDSETRHTNLIKHESYAENIWQQDGKQQNIVLVKLFTLTCISSVLELSCVTLTLDTLICKAGNVTHFVNTVLLSVVTCQITEHHKAILCIVSILLILEMNPTKTNDTEFVSEFAYERHRIPIDKVTPVDLIKNSAGKLIECRKKELSVVLLFYVSVRKEIMVRIGNH	0.049	3	1 (1)	3	1.79691e+06
Tt_077930-T1	Ndufs8	NADH-ubiquinone oxidoreductase subunit 8-like	208	23.4	C:GO:0016020; F:GO:0016651; F:GO:0051539; P:GO:0055114	C:membrane; F:oxidoreductase activity, acting on NAD(P)H; F:4 iron, 4 sulfur cluster binding; P:oxidation-reduction process			MASALRNVCALRLAGRFYLAAVRPFSVNSSKLTYKIVNPGDPSMDWKDITDRAANTAFWSEIIRGLGVTLGHIFKEPATINYPFEKGPLSPRFRGEHALRRYPSGEERCIACKLCEAICPAQAITIEAEERADGSRRTTRYDIDMTKCIYCGFCQEACPVDAIVEGPNFEFSTESHEELLYNKEKLLNNGDKWEAEIASNLQADHLYR	0.023	6	1 (1)	1	142774
Tt_078533-T1		cytochrome c oxidase subunit mitochondrial-like	122	13.9	F:GO:0004129; C:GO:0005740; P:GO:0022900; P:GO:1902600	F:cytochrome-c oxidase activity; C:mitochondrial envelope; P:electron transport chain; P:proton transmembrane transport			MASFALRKVISQVPRNVLYLSTRSLSKNLIDTYSMEHATGLEKKELMAKAAGNENPFDMRVYKRGPGTKTDPNIIPSAYQERLIGCICEEDATCINWMWLEKGEPKRCECGYWFKLIDAKPL	0	20	2 (2)	8	2.61039e+06
Tt_078602-T2		PDZ and LIM domain Zasp-like	673	73.6					MTSQMLTVKLLRGENIPWGFRLQGGKDFSLPLSIQKVNPGSLAENAGLQTGDGVLKIQGQATENMRHKEAQDTIIRAGNSLELLVQRGDMKIWKPTVTAIGNVPGSGPNVKPVTKTSLAATKQESLHIGSKHNVSAKPFIAGQDSRVQTIVNKQYNSPVNIYSMSNIAETLSAQTEVLTTGAKGINFMKGDQPINKDSAVYRMVHEEDVPSATGDEMNFHGILSPNTQSQAFRKLQMALDRGKEPHATPIKHVETPITKPALEKPAEPSTNQNICSECGRLLVGVFVRVKDKNLHADCFKCSTCGNSLKNVGYFNIGEKLYCDIHAKQAARMIAPKFEPITVTPGSTIPTDYTILGVGSVPPVPPTKLPSSTASPTSYSNVTPLPFYRGTTKVHHVNSR…	0.016	1	1 (1)	1	2.82867e+06
Tt_078632-T1		uncharacterized protein LOC106478150	369	42.4					MKNNLLSYYSFSNDKSWNRAKAEVMEKPDVRLSFSFSEDSKPREDEDVPKEISEVRKEMSLLLLSNLLQRNAEEIPSTEDDLAPTIPPKIQFANPRQCNCCERKMSPLAIGIGVQRYVDVGKCRRSCKKQHHRRHRNHHHKRYQNSTQPKESFSSLQGFDITNLLQDKREVCQPLVTRVQKHHLQRGPSDVEVVDSCHCVSESEQCARTSHRIIFYEHSPYEVEVDVGTCRGVCHEEHRCFPLKNRTITVEGPNGAKCVEVVEECQCSGSCYRMTFRESFHEGLWNETTNSTVKRIKNIDVGRCAGSCDDFHESQFHCVFRDPIDPERCLMSLKKSAPRCVPVKFSTHAFLTTEGVLKEVLSVDQCGCQ	0.002	5	1 (1)	2
Tt_078731-T1		RNA-binding squid-like isoform X3	337	36.8					MGDHDNQYNGGDYGDENQQYGEYAEGQYEQYQEQDGMDTSDNQGGDVSNTGGGTTGQTDSVKEDDRKLFVGGVSWDTSSNEIKDYFSKFGEVSDVNIKTDPATGKSRGFAFVTFSAVEPVESVLAVSSHVIKGKQVDPKRAKAKPGVKKIFVGGLDPAMPEADIKAHFEQYGKVENVELPFDKVKNQRRQFCFITFESEDAVNEVCKQPKQTVGSKECDVKKATMKPDPRAMRGSFMGGGWGAPRGRGNGRGRGRGTFQQQGWGNQSYGGYGQGYGGYNQGYGNYDYSGYGSYGGGYGSNYSGYDYSGWGYGQGYGQQNSSYGKVRRGNSVGYHPYR	0.002	7	1 (1)	1
Tt_078987-T1		nucleolar 58-like	548	61.7	F:GO:0030515; C:GO:0031428; C:GO:0032040	F:snoRNA binding; C:box C/D snoRNP complex; C:small-subunit processome			MLVLFESPAGYAIFKLLDEKKLQETENLYKDFESSETASKVVKLKHFQKFQDMTEALSAATAAVEGKMSKGLKKLLKKLVAKEAQESLAVADAKLGNVIKEKLNVSCVYNSAIQELIRCIRMQIDNLIVGLPQKEITAMALGLAHSLSRYKLKFSPDKIDTMIIQAVSLLDDLDKELNNYIMRSKEWYGWHFPELSKIITDNNQYVRTVLAMGLRSNAAGCDMSEFLPEELEEKVKEIAEVSMGTEVTEEDILNIKHLCNEVLEMQNYRTQLYEYLKNRMMAIAPNLTVLVGELVGARLIAHAGSLLNLAKHPASTVQILGAEKAFFRAIKTKHDTPKYGLIYHAQLIGQSNPKLKGKMSRMLAAKASLATRVDALGEDGSQELGIEHRAKLETRLKQL…	0.002	3	1 (1)	1	236476
Tt_079016-T1		CD63 antigen-like	233	25.7	C:GO:0016020; C:GO:0016021	C:membrane; C:integral component of membrane			MVQGGMSVVKYLLFAFNFIFVVTGAALIAVGAWVQAKAAEYVDFLGDKYASAPILLIVVGVIIFILSFMGCCGAIKENYCMVMTFAVLLFIIFILELAAGILAYVYKSEVETVIRHNMKNAMKNYNTSDHDIVTRTWDDMQSNLKCCGANNASEWKEYLGDKLPYSCCPGKDIQKECKKDHYKKGCIDALANFLEDKILVVGGVGIGIAFVQIIGIIFSCCLARAIKKEYEVV	0.002	4	1 (1)	1
Tt_079175-T1		PREDICTED: uncharacterized protein LOC108359742	311	35.6					MGKWSLLISSCTLKLEFLFTVALRAMMKSSTSQEPLGTEKSILIKSKQRPSKENLRNVIYEILCFCNKTHIGETGRKFTTRIKEYKDSARPMKIQNLAIARHVNWTQNKLGEIWNNRHGQILEEREISPPIRNSDNPTNCYSQKHYPVCQTNGHGNHQDTLSIGDMHQWKSKANKTYAAAVNIPKSDPGHCVRNYFFVKHNITHLVCETTETYNQTDIVANSVTFVRLLERKRAAQKNNVLVKPFIMFVTDSTEFCGEEVQVIAFRFNIDESIKRRHSCGSWSQPKAENNPSMSTQKQRLSTCAENLVISS	0.042	3	1 (1)	1
Tt_079329-T2		calcium-transporting ATPase sarcoplasmic endoplasmic reticulum type-like isoform X2	1020	112.4					MELGHAKTWQEVSDYFGTDPERGLSEAQVEKYLEKYGYNELPAEEGKPLWQLILEQFDDLLVKILLLAAIISFALALFEEHDGQITAFVEPFVILLILIANAVVGVWQERNAESAIEALKEYEPEMGKIVRGNKQGVQKIKARDIVPGDLVEVSVGDKVPADIRLIKIFSTTLRVDQSILTGESVSVIKHTDAVPDPRAVNQDKKNIIFSGTNIASGKARGIVIGTALDTAIGKIRTEMSETEEVKTPLQQKLDEFGEQLSKVISVICVAVWAINIGHFNDPAHGGSWIKGAIYYFKIAVALAVAAIPEGLPAVITTCLALGTRRMAKKNAIVRSLPSVETLGCTSVICSDKTGTLTTNQMSVSRFFVMDHVEDNDVALHEFEVTGSTYEPIGEVLKNG…	0.027	1	1 (1)	1	750691
Tt_079403-T1	RPLP2	60S acidic ribosomal P2-like	114	12.2	F:GO:0003735; C:GO:0005840; P:GO:0006414	F:structural constituent of ribosome; C:ribosome; P:translational elongation			MRYVAAYLLSVLGGNKNPSSEDIEKILGSVGIEAEKQKLDKVIKELKGKDVKEVMEQGRSKLASVPVGGGVSPAVGVAADKQETTEPAKVETKEEAKKEESESSDEDMGFGLFD	0	30	2 (2)	7	2.20338e+06
Tt_079414-T1	Ssrp	FACT complex subunit Ssrp1-like	735	82.8	F:GO:0003677; C:GO:0005634; C:GO:0005694; P:GO:0006260; P:GO:0006281	F:DNA binding; C:nucleus; C:chromosome; P:DNA replication; P:DNA repair			MDFLEFPDIFKEDRGAMNPGRLKMTNQGVIFKNSKTGKVEQVQGSEMESICWHRLASGFGIRIMMKNGQAYRFGGFGEPDHDKLGKFFSHNFDLEMKTKELCLKGWNWGTAKFNGSVLSFDVDKNSAFEIPLGNVSHCTTTKNEVTLEFHQNDDAAVSLMELRFHIPTDNSSEIDPVQAFNDNVVAKASIIQATGDAIAEFKELQCLTPRGRYDIKMFPSFIQLHGKTFDYKIPLTTVLRLFLLPHKDGRQMFFVISLDPPIKQGQTRYHFLILLFSKEEETTLDLRLTEEEIKEKYEDKLQKEMSGPTFEVISRIMKALVQRKITVPGNFCGHSGTPAITCSYRAGNGLLYPLERGIIFVHKPPVHIRFDEIANVNFARSGGSTRSFDFEVETKNGVV…	0.002	2	1 (1)	1
Tt_079798-T1		uncharacterized protein LOC106461647 isoform X1	194	21.1					MGTWIILVACSIAAVTALPRYKRRAYELPAGADLLVGNIQTTFSCPGDGYYADVDNDCKVYHLCHTVTHANAKSEVQQWSFMCGNLTVFNQLTLTCSSPEDVPPCSKDVLNLNDNIGLEDNLTEQGTEKTGPLLGGRLPLINRKFEIELPVAAALPPDIRIIAFNPIELVTKKAPEGVEAPSDVTQEKRVKSGR	0	8	1 (1)	2	85384.2
Tt_079804-T1	dre4	FACT complex subunit SPT16-like	1068	121.4	C:GO:0035101	C:FACT complex			MSLTVDKDAFYRRMRRIYSAWRNAGEKDNGFSKMDALVSAVGVDEDVVYSKSTALQTWLFGYELTDTIMVLCESAIYFLASKKKVEFLKQIESGKENESDVPPITLLTRDKADKDKANFDKLIDAVKKSGKGSVTGEFTKDKFPGEFLESWRAALAVAKFDSIDVSSAIAYIMAPKEESELATIKKACQVTVDVYTKYLRDQLMEIIDADKKVKHSKLAEGVEQSISDKKYVTGVDLTQVDLCYPAIIQSGGNYNLKFSVVSDKNTLHFGAITCALGARYKSYCSNIVRTLLVNPTQEQQDMYNFAVTVEEEILNKLQHGVPLCDVYNHARDYVEKKQKNLVDKMTKNFGFGMGIEFRESSLVITSKTTAVARKGMVFSVTIGFSGLENKGTTDAQFKT…	0.002	2	1 (1)	2
Tt_079897-T1		---NA---	263	30.3					MYTEGQYRFQEECSRPCAAFGIISFIVIGAYVNDKTCEILAFDSPLISFYSNTFLLTTTGCVPIFITFFPPAWPGCEKNHPDINLLSATRESNSRCQLVRYEPDDDRRRSKRCSLFYAASGEIRPIQFRSQLVLDEFSNNTASCGLVASCVALRCHFRFKRIRTAHDRPMLSSEHYVSSLYFKLSEYVIGYFVDCTRVKSQLFPNKDKPNNDRISYRIILTEKVIESLPREILPSNWFQTFTHDIMYCIIHVTSHVLQEASVV	0.037	3	1 (1)	2	2.98473e+06
Tt_080428-T1		GRIP and coiled-coil domain-containing 2-like isoform X2	2798	332.3					MSRETYAGVPQRSPRMSRRQEMATLGQGLAAKSYTSTTQSPAGQGSSVASRVHSSPSQIRKNRVSRSSNNSPLNAPPNNYISHSLSGSAFHASQGYYSDDPDSPVMDVRTSSSAQNSGHRSRSITRGTARNYHSLERDQERGFVPVREPRERSLDRVEMNRHSRGRERSLERSGYRDREMERDPYYRDRETALDMDGYARDSGHHIPRTTHTSSAPTTERPSYSRDNFILEIQSRLNDLQSQYDSVKRELDVTTQKLGSSMHSIKTFWSPELKKERALRKEEAAKYTLINDQLKILRSENQKLNQLIKQLEEDLRTAHIRNPEPEVQQHLEALYSEKDHMKKEIFLLRETIKELEMRIGTQKQTLSARDESIKKLMEMLQNKGVGGKMLEEEKLEVERL…	0.013	0	1 (1)	2
Tt_080631-T1	MECR	enoyl-[acyl-carrier- ] mitochondrial-like	360	40	P:GO:0008152; F:GO:0016491	P:metabolic process; F:oxidoreductase activity			MATFISRCGISQLDNQLSKIRFTFLSKSNSSKSYRIHTRLNSYALQYNQHGDPIKVLQKIEIPTPKDGLKSTEVEYKMLAAPVNPADINMIQGTYPVKPPLPAIGGNEGVAQILKVGSDVKGLHVGAWVIPNSAGWGTWRTQGICDQKELLTITNNIPVLSAATIAVNPCSAYRLLNDFGELQPGDTVIQNGANSGVGQAVIQIAHYLGFHTINVVRNRENLQELKDLSQVMDDIFKKIPKPKLALNCVGGKNALEMMRHLAKRGTMVTYGGMSRQPVTVPTSALIFKDTRILGYWMTQWNKEHSDSPERRKMLDFVCDLARKGVLRPPNSRIVPFRDYKEAIEKAMAPFVSQKQVLVME	0.029	3	1 (1)	2
Tt_080729-T1	RpL13A	60S ribosomal L13A	203	23.2	F:GO:0003735; P:GO:0006412; C:GO:0015934	F:structural constituent of ribosome; P:translation; C:large ribosomal subunit			MPGFSEKPVVIDGQGHLLGRLAAAVAKTLLIGQRVVVVRCEGINISGSFFRNKLKYLAFLRKRCNVNPRRGPFHFRAPSKILLRTIRGMLPHKTKRGEAALSRLKTFEGIPPPYDKRKRVVVPSALRVMRLRPGRKFCTVGRLSHEVGWKYQNVIATLEMKRKAKCAVYYSHKKQDQKLLQEAKQKVAKVIEPYRSIVESYGY	0.002	10	3 (3)	5	1.76882e+06
Tt_081157-T1		tropomyosin isoform X9	186	21.2					MEAIKKKVQVLKEEKEHAIDMAEIAEQQSREANARADKAEEEVLILQKRVQLLENELDSIQELVANTNTKVGEKDTSLQSAEGEVAALNRRIQLLEDDLERSEERLKIATQKLEEALQAADESERQRKALENRTNLEDDKMSILETELGQARVLAEESDKKYEEAYHTLHTITCELGLPYSSYNDL	0	23	5 (3)	14	606345
Tt_081315-T1		Heat shock 70 B2	634	70.4	F:GO:0005524	F:ATP binding			MSCERVPAIGIDLGTTYSCVGVFQNGKVEIIANDQGNRTTPSYVAFTDTERLIGDAAKSQVSLNPENSVFDAKRLIGRRYDDPKIQQDLKHWPFTVVNQDGKPKVKVSFKGENKLFNPEEISAMVLTKMKETAEAYLGQPVKDAVITVPAYFNDSQRQATKDAGAIAGLNVLRIINEPTAAALAYGLDKNLQGEKHILVYDLGGGTFDVSILTIDEGSMFEVRATAGDTHLGGEDFDNRMVSHFVEEFKRKHKRDLHKSPRALRRLRTACERAKRTLSSSTEASIEIDALFEGIDFYSKISRARFEELCMDLFRGTLEPVERALSDAKMDKHRISEIVLVGGSTRIPKIQKLLKDFFNGKDLCMSINPDEAVAYGAAVQAAVLSGDTSHNIKDVLLVDV…	0	6	3 (1)	9
Tt_081573-T1	C4orf27	histone PARylation factor 1-like	199	22.9	C:GO:0005634; P:GO:0006974; F:GO:0008270; P:GO:0010835; P:GO:0018312; F:GO:0042393; F:GO:0072572	C:nucleus; P:cellular response to DNA damage stimulus; F:zinc ion binding; P:regulation of protein ADP-ribosylation; P:peptidyl-serine ADP-ribosylation; F:histone binding; F:poly-ADP-D-ribose binding			MPEDFFHFWEFCKSMNAEKPQDALKNALGIELVGPFDILGKKLRNIHVQKPSDFLRHWRYYYDPPEFQTVFKGDNKTQYHLGYFRDEPGEPPVFVAANSATRGCKITPVGDNLFAAVNVEITKVLQTSCAKKMKDKLLEIQETLKKWADKHHYSLETKTMNIKKRNRKIVTKTFHGAGIVVPVDSNNVGYRPLPETNSK	0	9	1 (1)	2	291009
Tt_081998-T2		papilin-like isoform X1	2402	262.9	F:GO:0004867; C:GO:0005576; P:GO:0006508; F:GO:0008233; P:GO:0010466; P:GO:0010951; F:GO:0030414	F:serine-type endopeptidase inhibitor activity; C:extracellular region; P:proteolysis; F:peptidase activity; P:negative regulation of peptidase activity; P:negative regulation of endopeptidase activity; F:peptidase inhibitor activity			MARTIVSFRSLAVALGVILLVPNVDARHRFRHGHHRGHHSFFSPQNISVGLDTPAEESGPWGPWSESSQCSRSCGGGVAFQLRSCTDLSITGTHSCVGPSKRYFSCNIQDCPEGSRNFREEQCSSFNSLPFEKKYYTWVPYFKESSPCELNCKPVGERFYYRYGRKVIDGTPCFNDGSLDICVDGLCMPVGCDKILGSKAKEDKCRKCGGDGSSCRTVEGFVGNDNLRVGYNDIILIPMGSTNIKVRETKPTNNYLAVRNMTGQFYLNGNWKIVFPSRLKFAGTVFHYERKSFGYLSPEYLWAHGPTKEPLFIVLLYQEKNPGITYEYSVPRDVSKTHTDTYSWTFEDFGPCSRTCGGGIQIGSVRCVRNNGLEEVPEFLCDPLLKPVTNRTCNKKACP…	0.002	1	2 (1)	3	735321
Tt_082036-T1		zinc finger BED domain-containing 5-like	597	68.6					MDLKKENVIKIDKNQKTRLYDSDYLAFGFIASDDRNCPSPLCLVCGENLSNSSMLPSKLKRHLISKHPNLADKTKEYFQRLKESTSKQARIFERKFNISKKANQASFAVAEIVAKQMKPHTIAESLILPACVTIAKIFFGDAAAEEIKNIPLSDNTIGRRITNMSVDIEKGVMLKLKAADFFAIQVDESTDLSGKSQLLAFIRFIENDGIVEDFLCCRELPETTKGQDIYDALTSYLNHWDLTWEKCVGICTDGCPSMIASVKGFVTLVKQSQPNIFITHCFLHREALVAKAIGPELKEVLDMVVKMVNYLKSRPVKCRQFTKLCESMDAEHVTLLFHTEVRWLSRGRVLSRFYELREELMIFFTSNNIEYVKFLSDESWCLKLAYLSDIFQHLNNLNM…	0.006	1	1 (1)	2	113773
Tt_082180-T1		hypothetical protein ALC60_00999, partial	132	16					MLHTIYSRHQHKTNQHLAKNSNKYDISVNTKFIQKPGTKLRFILCKRYTDKHNTNNIYKIQCDNYHDFHIEETNREMETRFKEHKMSPSYVFEYCKSNKHNITIENTQIINKETNINKRKIKKALYNNSSSK	0.025	6	1 (1)	5	3.02115e+06
Tt_082237-T1	MVP	major vault -like isoform X1	870	97.6					MAGSKVYSKGQSDDSSIYRIPPFYYLHVLDQTSNVTRVEVGPQTYIRKDNERIILGPDKMVIVPPRHYCVIQNPVVRGDDHSIQYDAAGQVKLQHADLEIRLEQEPFPLYPGEVLHLDVTLLKVVPSNTALRLQALRDFEDGTDKKVAGDEWLFEGPGTYIPRKEVVVLETLKACVIKPNQALKLRARIETRDRDGKMRFCGEEWLVRKTGAYLPGAYEEVVEIVDAIVLTEKEAVHVRATRTFQDDLGVLRKNGEEWLVKLSDTETYIPGVYEQVIGVVPITTLSNRQYCVILDPVGEDGKPQLGQKKLVKGETSFFLMPGEKLENGIQDVHVMGEDEGLILRAKESFLDDTIQPAVKRNPGDKWMIRGPIEYIPPTEVEAIIKRYSIPLDENEGIYV…	0	9	5 (5)	10	507571
Tt_082499-T1		uncharacterized protein LOC111088274 isoform X1	1886	212.5					MSNSSNVPETKVCFVVLPKLPTFMSDKVTITTPQQLEHHNIDESLTECEVSGLKRDYFEIRQTEMECPMQSLDIDFSTLKDVKELSKIYPDPPTLDPGYGSYFHPTQLTYLKHDPDVKKNKTASNEHVVSNSTKCFPNERRKNELRKKWQMCLQETETYSDNLDKGFVVTSNGSETKLLIKSKKCENKTVKNKWTLKGKCQTVKQECENSDVRGPREGSAIEGEPLLYVSSSEDNNLITISSPRKDDFTKELFGNNSNDPTFDFLESSIPTLAGVLKASYKYNVPKEASQNTDLVAMSKEIYGHDGYYQLQNVGALPKKGKKISPLSVYTTIFDNVISSVTCKRFKRKSSKRKLDKSCSSRYTTNDTKECHPTSQISNQSANRSDEEVVKDVMSDMIQR…	0.017	1	1 (1)	2	68896.5
Tt_082561-T1	Fib	rRNA 2 -O-methyltransferase fibrillarin-like	351	36.9	C:GO:0001651; F:GO:0003723; P:GO:0006364; F:GO:0008168; C:GO:0015030; P:GO:0032259	C:dense fibrillar component; F:RNA binding; P:rRNA processing; F:methyltransferase activity; C:Cajal body; P:methylation			MGRPGFTPRGDRRGFGGGGRGGGGFRSGGGDRGGGGFRXXXXGGGFRSGGGDRGGGGFRGGRGSGGDRRGFGGRGRGGDRGGFGRGRGNGRGGKSPGFRGGRGGGGMKGGKKVFVEPHRHEGVFIARGKEDALVTRNLIPGDSVYGEKKIAVEDANGKIEYRVWNPFRSKLAAAILGGVDQIHMSPGSKVLYLGAASGTTVSHVSDVVGESGLVYAVEFSHRSGRDLIGVAQKRTNVIPIIEDARHPHKYRMLVGMVDTIFADVAQPDQARIVAINAHHFLKNGGHFVISIKANCIDSTAEPEAVFANEVKKLQAERLKPQEQITLEPYERDHAVVVGIYRPVPKKSQGEL	0	26	6 (6)	11	1.70737e+06
Tt_082625-T1	eIF3-S10	eukaryotic translation initiation factor 3 subunit A-like	1194	143.7	P:GO:0002183; F:GO:0003743; C:GO:0005852; C:GO:0070993	P:cytoplasmic translational initiation; F:translation initiation factor activity; C:eukaryotic translation initiation factor 3 complex; C:translation preinitiation complex			MPTYFQRPENALKRANEFIDVGKKQRALDALYDVIKSRKHRTWTKIHEPIMTKYLELCVELKKSHTAKEGLFQYRNICQQVNIKSLEDVVRMYLRLAEEKTEAARQESQQSILDIDDLDQMQTPESLLLSAVSSEDTQDRKDRVVLTPWVKFLWESYRQCLELLRNNSRVERLYHDIAQQAFKFCLKYSRKTEFRKLCDNLRTHFSHIQKHQNQQTAVNLNNPESQAMHLETRLVQLDIAIQMELWQEAYKAVEDIHSLMALSKKPPKPQLMANYRQKLALVFWKAGNYLFHACALFRLFHLSRELKKNITADEIQRMASRVVVATLAIPMPPNRPEIDRLVETDENIIDKNNRMLATLLGLSNPPTRSSLVKDLLRFGVIQHAHPHLQDLYRWLEVEF…	0.002	1	1 (1)	2	114754
Tt_000302-T1		ubiquitin carboxyl-terminal hydrolase 5 isoform X1	823	92.5					MHDNQNIFELGALVYCCSKMEILNQHLSKIRTPLGGEQVYKEECVFSFETPDSENGLFICLNTFLGFGRNHVERHYKKTGNAVYLHIKRIKKELKQDKGCCDETKKPTRLAIGVEGGFIPEEGNKYEILDFTSIAVLPDFIEIPLPNLDLPELVQLSVASILAAQSPTRAGEASALERTWDGEKRKVSKHADSLVQLDNDLRIPPKGWKCERCDKTDNLWLNLTDGKILCGRRFFDGSGGNNHAVDHFKETGYPLAVKLGTITPSGGDVFSYDEDDMVEDPNLAKHLAHFGINITQMEKTEKSMIELEIDMNQRIGEWAILQESGSHLVPVYGPGYTGLANLGNSCYMNSVMQVVFSIPDFQKIYFENAERIFDSVTADPARDFTVQMAKLGHGLLSGD…	0.035	2	1 (1)	1		0	20	10 (10)	13	5.03933e+06
Tt_000316-T1		vasodilator-stimulated phospho -like isoform X3	366	39.8					MSMSAEQSLASARASVMIYDDLNKRWIHSGSSSGLSKVHIYNHVANNTFRVVGRKLQDHEVVINCAILKGLKYNKATATFHQWRDNRQVYGLNFSSKEEADNFSLTMQRALEKLNQNNVTKPLPPPPVPNHQFQQQQSGYQQMGDSIPDDHKFGTKEDTDGERRQSLVQYSNNSVGNSHPPTPPQQNGHQRTSSGPAAPPAPHPPPMPVMSAVPPPPPPPPLNAKAPPAPPPPPMSGAHTLPRTGPSSESGGIGGTSLAVALQGAKLRKTSSKSPEGGGNCESARPGPVNLMDEISKTLARRRAQVENHQNSQDREREGTSKETKRPREKQNSVNGSSPNKASGPESPKLFCRFVNFLLRKHGNKI	0	24	6 (6)	18	1.65456e+06	0	15	4 (4)	6	442734
Tt_000782-T1		pyruvate mitochondrial	930	102.7					DHAGNVIHLYERDCTVQRRHQKVVEIAPAPNLDPKIRDRMTEDAVKLAKNVGYQNAGTVEFLVDEKDNHYFIEVNARLQVEHTITEEITGIDLVQSQIKLAEGYTLPELGMIQDNIEMRGCAIQCRVTTEDPSKNFQPDTGRLEVFRSGEGFGIRLDSASTYAGAIISPYYDSLLVKVIAHGNNMRGAASKMIRALREFRVRGVKTNIPFLLNVLENENFLGGTIDTCFIDENPQLFDIQPSQNRAQKLLYYLGSLMVNGSMTPLATPLKPSEIEITIPETPAGVKPPLGWREILVKEGPASFAKAIRNHKGTLLMDTTFRDAHQSLLATRVRTHDILKISPFVAHNFTNFYSLENWGGATFDVAMRFLHECPWERLERMRELIPNIPFQMLLRGANAV…	0	3	2 (2)	3	403388	0	4	3 (3)	4	567035
Tt_000864-T1		chymotrypsinogen A-like	394	43.6	F:GO:0004252; P:GO:0006508	F:serine-type endopeptidase activity; P:proteolysis	EC:3.4.21	Acting on peptide bonds (peptidases)	MKVLLLVAFLLGTTLAYPQDDDGPVWGGSSNDNDDGGISSRVGNPQSGFGNCECVPYYLCKDNNIIIDGSGLLDPRKKPVASKEPKLSARLGPEGPSGCGPFHVCCIAPETSTVKPYTHQCGFRNVNGINKRILSPNGKDLSEFGEWPWQGAVLKVEGKVNIFQCGAVLIDSYHLLTVAHCVYKFTLENAFPLKVRLGEWDTQNTNEFLKHEDYEVEKIYIHPKYDDERKNLWDDIAILKLKAEVSFGPHIDTICLPNNQEHFAGVQCVVTGWGKNAYKNGSYSNVLREVHVPVITNDRCQELLRKTRLSEWYVLYENFICAGGESNADSCKGDGGGPLTCWRKDGTYGLAGLVSWGINCGSPNVPGVYVRVSNYLDWITKITGRPISDYWPRS	0	27	12 (12)	91	7.41801e+07	0	43	15 (15)	130	3.36661e+08
Tt_000904-T1		---NA---	187	20.9					MSHRSGHTISGISGVGETFRTIPRIMKKPPEIFHERCLGSSNMFCSVAQYTSAAITEYRVDVNNSVYYGPPLHILDSTIYFARRFRDQVRASTKIMLTRLFLIGSSRPRKRQDGRQIASYTMCVGPPSTCKHCFCNSSTVLASLTKTVSPPGLSNRCPGTHVTCHLDGWNDTNTTMEEGRTKSNHKQ	0.019	5	1 (1)	4	5.42324e+06	0.026	5	1 (1)	1	5.21565e+06
Tt_001346-T2		coronin-7-like	1005	111.9	C:GO:0005794	C:Golgi apparatus			MYRFKPSKYKNATPKVPKRGEGWVLDLNIGSPQSFGNHIKSSAAFMAFNIDSGGGGSLGVLSLTDHGQMRGNLPTLHAHSGLVTDFDFSPFDDAILATVSEDCHVKVWRIPCDGLSTSEPCNPEMTLDPLDHRVEVVLFHPTVDCLLTMSVDKTVRIWDISKNTEIYANTDHENLVQSLHWKGDGSLVVSSARDKKLRILDPRTKVVAQETNSHSNNRDSRVLWLGNSDRVLSTGFGSAREREVILRDVRNFSNPLASYSGESSLGVLIPLFDPDTSMLFLTAKADTCLMFWEVNNKEPYFSEGIKYVGDVQTKGAALVPKRALEVMQAEVNRVLLLGPDCVVPVSFQVPRKSYRDYHEELFPDTAGTEPSLTCDEWMMGRNDTVSKISLNPRKWPSNG…	0	3	3 (3)	6	342615	0	2	2 (2)	2	372459
Tt_001421-T1	frem3	FRAS1-related extracellular matrix 2-like	3100	348.1					MWWKLNFAVFILLSCNVLTYEQQHGPAISESTIIESNNAINVPFGRSVFIDPVKDLKIRVRDGDRCTVKVIQNDPLSQRPGKLTPTHFPCQFGLREVQYSHFGARTPPQDRVKLLLRYDMAEDTIIVPFTINVQVLFEQLEVVTRNMPITVEKLMGLSTPIDNKALQFTYDKNNQKCKVMTLGNTNDFPRYGELVNDTSTGVLQDCNSFLQADIRYKHTFPNNSPNQDYIPMLVEIADSNGNLLKQEYFQVTVRIKDGQPNNPPQPSFNSLLLLDVNQFIMTAITPRILSAQDIETPSDKLIFNITSPLSFGEGQIISTDDQNVPISSFYQKDLEDLKIAYKPPASDSDIRRTFEVEMEVVDAEGLNSEPFSLMIVVHPKNTLAPLATRNSGLMLFEGQ…	0	1	2 (1)	3	116873	0	1	2 (1)	2	40692.7
Tt_001548-T1	LanB2	laminin subunit gamma-1-like	1114	122.9					MNTFGDEIFGDPKVLKSYYYAITDFAVGGRCKCNGHASVCIVTDDGYGQHELVCQCEHNTTGPDCNECLPFYNDLPWARATAADANECQPCNCNGRSKKCYFDRHLYEHTGHGGHCVDCRDHTAGPHCERCEENFYEREDGRCVPCNCNPTGSRSLQCNQQGKCQCKPGVDGARCDHCSSNYYDFTSQGCRPCGCNIAGSVNSEPNCDAVTGTCRCKDNVEGQRCDRCKPGFFSLQEENEFGCLPCFCYGHSSICRSAPGYSKVAIKSTFTRGNENWKAQLKSGREIPFQFNPIIQNIGVDSSGRDPIYFVAPDRFLGDHRSSYNQFLSFTLRIGDGVPRATVDDVILEGSGLTISQPIFGQGNPLPAVKNQDYKYRLHEHSIYGWNPRLNTHDFVSVL…	0	2	2 (1)	4	710668	0	11	10 (10)	26	4.59769e+06
Tt_002142-T1		RNA-binding Rsf1-like isoform X1	146	16.1					MNRRDSGTRVFVGGLTEDIQKEDLEMEFEKVGKIVSVWVAQNPPGFGFVEFDDREDANEAINSMNGQLIKGTRIRVEMSRGKRSGRGGGRGRGGFRGGRGGGFRGGQGDYDRRGPSYDSYRGDSNFSRRGGGYRSHDGRGRILLVR	0	51	7 (4)	26	2.15585e+06	0	51	6 (4)	13	2.44132e+06
Tt_002257-T2	rps24	40S ribosomal S24-like isoform X1	134	15.3					MSETTCTLRTRKSVTNRLLCRKQMVVDVLHPGRATVPKTEIREKLARMYKTTPDVIFCFGFHTQFGGGKTTGFALIYDTLDYAKKFEPKYRLVRNGLAERVKTGRKQRKERKNRMKKVRGTAKAKVGAASGKKR	0	9	2 (2)	6	723801	0	11	1 (1)	1	566492
Tt_002334-T1	RpL37A	60S ribosomal L37a	92	10.4	F:GO:0003735; C:GO:0005840; P:GO:0006412	F:structural constituent of ribosome; C:ribosome; P:translation			MAKRTKKVGVVGKYGTRYGASLRKMVKKIEITQHSKYTCTFCGKETMRRTCVGIWKCRACQKTVAGGAYVYSTTAAATVRSAVRRLREMKEQ	0	20	1 (1)	8	2.65586e+06	0	20	1 (1)	1	899529
Tt_002342-T1	Arp1	clone 403-like	376	41.8	F:GO:0005524; C:GO:0005737; C:GO:0005856	F:ATP binding; C:cytoplasm; C:cytoskeleton			MCEEDVAALVVDNGSGMCKAGFAGDDAPRAVFPSIVGRPRHQGVMVGMGQKDSYVGDEAQSKRGILTLKYPIEHGIVTNWDDMEKIWHHTFYNELRVAPEEHPVLLTEAPLNPKANREKMTQIMFETFNTPAMYVAIQAVLSLYASGRTTGIVLDSGDGVSHTVPIYEGYALPHAILRLDLAGRDLTDYLMKILTERGYSFTTTAEREIVRDIKEKLCYVALDFEHEMTTAASSSSLEKSYELPDGQVITIGNERFRCPEAMFQPSFLGMESCGIHETTFNSIMKCDVDIRKDLYANTVLSGGSTMFPGIADRMQKEIGALAPSTMKIKIIAPPERKYSVWIGGSILASLSTFQQMWISKQEYDESGPSIVHRKCF	0	65	26 (2)	616	8.36172e+08	0	80	29 (2)	782	3.89938e+09
Tt_002440-T1	PDIA4	disulfide-isomerase A4-like	637	72.9	F:GO:0016853	F:isomerase activity			MYLSVFKRVLLLMFPLSLLYQTCMLEDVVVNEQPLENEDDIPTIEGFGGDVKITEDDDVLVLNNDNFDLVVYPKDIILVEFYAPWCGHCKSLAPEYAKAAKKLKEEAPPIPLAKVDATAETDLASRFEITGYPTLLIFRKGKESKYEGPRSAMGIVEYMKEQADPNWKPPPETVVTLTSENFTSVVNKADLILVEFYAPWCGHCKKLAPEYERAAQVLKENVPPITLAKIDATSEKELSDVYKVSGYPTLFLFRRGRKFPYDGPRDETGIIEYMKEQIRSPSIEVTTVKALEKSKSKTDINVVGFFRNEEDWLYDEYLAAANEKRKKIKFLHTFNQDVAAHYKTSVPSLVLFQPETFQSKYEKTKSTFKKEEGKSTDIEKFILKHAIPLVGQRTHQNLW…	0	18	9 (9)	24	3.36401e+06	0	19	7 (7)	12	1.77949e+07
Tt_002505-T1	Cht11	acidic mammalian chitinase-like isoform X1	437	49.5	F:GO:0016787	F:hydrolase activity			MVQLIMSIYYSVKWKMWKKHFASRLILVILLTTLAVTYSLDYRDNYRINSLKYSAHHERAEKVQQAIFSLIHQNASVDKVKVSFPVISDIKTNTSYLLVCYYRWQGKGSQMLQPSKINTTLCTHIIVGFALVKNNTLVPADPSDIQGYELVTGLKKTAPNLKVMLSVGGGGGAGGISPSVSTSQNRAKLISSMINLLYKCNFDGIDIDWEFPAWAGSSLEDKKNFIFFLRDFQNAVTSEQKNNKNRPLLLSVAVAAVLPIMRASYDILSLAKYVDFINLMSYDYHDFMWYLPFTGHNSPLFRRKDELGYFATLNTAWSAEEWAKEGMPRSKIMVGIPTYAHIYTLATPYIHGFNAPAVGGGEMTYDEACNFVKNGAVRVFDKESQVPYAYQNRTWVGYD…	0	3	1 (1)	1	155771	0	16	5 (5)	6	1.03415e+06
Tt_002549-T1		bone morphogenetic 4-like isoform X1	420	48.7					MFGCKSNCYKLCLLIALTSWCCGQPLQAFADRFFTKDLSYMTIPTPFPIRKVNKSEVISIQRGTLVNNRTLVTNTTLSDLMKVALMKQKKKRERVRQEWLKRIKNRILRGVGMSREPNISPSILSNRLPRRFSDVLKRINKTHSEKNSMFLEKFQSFYPSCSLPESVDSDLWNDPTTFNVYYNVNSKPTTSHSKVKLAKLRLYKDRDLQPEDLKQNLTLPPCPLKLFRPPRLSVGNTGLTVSLYWYRRPLTNISREDNKSYLYSRIIAANYRGWINFDVTYFFRIWSKMPNLNYGFKIEVEDSYERRHNPNSFFVNINCTDEEGLLSTNTTSLQSPFPYIEGLNPDVGTNGSAVFEEEIFPTLDLQTVEASPELNIFKYRPSTSRSVSKQLVAEEETKK…	0	7	4 (4)	11	1.84501e+06	0	4	2 (2)	2	437804
Tt_002574-T1		uncharacterized protein C31H12.03c-like isoform X1	298	33					MADSVDSTTDLQGLKVADLKKELKSRGLTTTGNKNELIERLQKAIHLPKEPVETTEDADEDDVLNDDHLLGDDIKSTDVHETVNEEEILGTLPQQETEITAKPTVKVKPSTITLTQQQVTKTCASKSPSVMGKISGVVKITRPVIQQTFTSEKPMKDTIITEENKSKDDNVVLTSAKNLTPEKRHSICINKFNTSNSVNKLQARAERFGLPNKNSVITTGSLKPTALSGFSVKPVLDLEKLRKRSERFGQSVSAAVKQIEEREKVLKRKQRFGNSISTASVGSEEEKKRRRIERFGCT	0.002	3	1 (1)	2	357913	0	9	1 (1)	2	98569.5
Tt_002624-T1	Aats-gly	glycine--tRNA ligase-like	737	83.9					MYVAKRFFLLGYNSFKYIGIVDVGTRLFSNSRLTAKNLSNNWGAKKIKKLKLAYTKAMTDPKVNEILDPLRKSVKEQGDLVRNLKENGAAELDVKKAINELKTRKKILEDKELELAPPEVGFDRVKMEDLLKRRFYFDQSFSIYGGIAGQFDFGPMGCAMKTNILNAWRSHFVLEEQMLEVDCTMLTPEPVLKASGHVDRFADLMVKDMKNGECFRLDHLIKAHLEKLMMDKKTTAEQKAEYEDIIVKLDGMNKEEMNAALRRFNMKSPITGNDLSDAMEFNLMFSTSIGPTGLVKGFLRPETAQGIFVNFKRLLEFNQSKLPFAAAQIGNSFRNEISPRSGLIRVREFTMAEIEHFVDPANKEHPKFDTVKNLVVTLYSACNQMEGKAAEQTSIGEAV…	0	6	3 (3)	7	1.46828e+06	0	6	3 (3)	3	1.11991e+06
Tt_002692-T1	eEF1delta	probable elongation factor 1-delta	275	30.8	F:GO:0003746; C:GO:0005853; P:GO:0006412; P:GO:0006414	F:translation elongation factor activity; C:eukaryotic translation elongation factor 1 complex; P:translation; P:translational elongation			MAQPLLHEKIWFDQCKYLDAERLWQEQLVKKQAGGIEKPAKKNPPGKQAPQSSLIDEIARARQHIKNSLISGDSSTLGGCNLHDITEIASRIQNLEVENTNLKNVVTNLTNLVSKLDARVSALENRKPEVAGAGIDKPQPPEASVENDDDVDLFGSDEDEDEEANTLRNKRLEEYAAKKAKKNPVVAKSNVVLEVKPWDDETDLKLMEKQVREIMTDGLLWGAARTVPLAYGIHKLQISCVVEDEKVSIDWLQEKIEELDELVGLLQSYLNTLDT	0	17	4 (4)	7	1.68489e+06	0	15	3 (3)	4	363911
Tt_002700-T1		tumor D52-like	206	23					MATTPGEQKKTTYTELSETYYDASKETKVYDATPDSGIHDLTNMAPEHRVKLEEEWKEELAKTEEEIITLRQVLASKVRYAQDLKHKLGITVWKEFKDDMEQGIKNIQETEVYQRTSQTLKTAGEKTTSALGNLGASVTKKLGEVKNSQTFRSFEEKVGTAYESVKNKIPGSRSTGAVNFEEALNKEEKPSSGSLTPTTPEGNPLP	0	57	10 (7)	33	5.7353e+06	0	46	6 (4)	14	5.72492e+06
Tt_002708-T1	AK2	Adenylate kinase	265	29.4	F:GO:0004017; F:GO:0005524; C:GO:0005758; P:GO:0006172; P:GO:0016310; P:GO:0046940	F:adenylate kinase activity; F:ATP binding; C:mitochondrial intermembrane space; P:ADP biosynthetic process; P:phosphorylation; P:nucleoside monophosphate phosphorylation	EC:2.7.4.4; EC:2.7.4.3	Nucleoside-phosphate kinase; Adenylate kinase	MGPVPAVKVKEDSETSLKLAEGKHVKSSSFSSSQDEAGNGINAILLGPPGAGKGTQAPMLKEKYSVCHLSTGDMLRAEVASGSELGHTLKKTMDQGKLVGDNLVVDLIDKNLEKPECKNGFLLDGFPRTVIQAQKLDELLDKRKKKLDAVIEFGINESQLVRRITGRLLHPSSGRTYHEEFNPPKKHMKDDITGEPLIRRSDDKPEALKKRLESYYQQTQPLVQYYQQQGLHSKIDATLKPDVVFASIQAIFSKAKSKDLVYFVQ	0	45	7 (7)	12	3.61775e+06	0	12	3 (3)	4	619907
Tt_002781-T1	Ef1beta	elongation factor 1-beta	224	25.1	F:GO:0003746; C:GO:0005853; P:GO:0006414	F:translation elongation factor activity; C:eukaryotic translation elongation factor 1 complex; P:translational elongation			MGFGDLKSETGVKALNDYLCDRSYIEGYQPSQADTVVFETLKNPPAASFPHALRWYNHIASYGGERSSFPGEKKDISAFGTSETISDTKPNKPAAGDDDDVDLFGSDDEIDEEAEKLKQERLKQYQEKKSKKPGPIAKSSVVLDVKPWDDETNMEEMEKNVRTIECDGLVWGAAKLVPLAYGIKKLQILCVVEDEKVSIDWLQEKIEEFQDYVQSVDIAAFQKI	0	29	5 (5)	14	3.62966e+06	0	41	7 (7)	16	1.00303e+07
Tt_002882-T1		cGMP-dependent isozyme 2 forms cD4 T1 T3A T3B-like isoform X1	676	77.8					MGTLEEKDEVIRRQENTIRQLQNLLARKDEEIQALCSQLDKYQSVLIPLSYNQHDKHGRRKERAQGISAEPQSLRTIQELITTKFPEYPKSEQSKELIKQAISDNDFMKNLEMIQIREITDCMYPIEYAKDSLIIKEGDVGSVVFVMEEGKVEVSKDGKFLCTLQPGKVFGELAILYNCTRTATVKAIMDCKLWAIERQCFQTIMMRTGLIRQAEYTDFLKSVPTFRKLSEETLIKIADVLEETSYKKGDYIIRQGARGDTFFIISKGKVKVTMKVPELEEEKFIRTLERGDFFGEKALQREDLRTANIIADDSEGVTCLVIDRESFNHLISNIDEIKQKRYDEEEVVARKKLNKEFENLKLSDLSVIATLGVGGFGRVELVRIGSDSSRSFALKVMKK…	0	5	3 (3)	8	3.20825e+06	0	14	10 (10)	18	4.85837e+06
Tt_003042-T1		leucine-rich repeats and immunoglobulin-like domains 2	383	44.2					MEGKCYLLEFNFLFVISYIFATTCDAITPCSEIEDLNPCSCTDFAVPRILKHSNGTISSYEEKEIWVTCDDIDGLGNLTIAMKRLRGFEINTAVISSSRIGYLPSHLFFDVVVKEIQIRYTKLKSFTQAEESAFLGLENTLLYLSMRYCGLIDGLKWEKLGELRRLNTLDLTGNHLDTIPPHWFNIPPPDLRFLHLKQNQISKLHDSSFAKMYNLKILDLSENQISTLKRSMFPDPVNYLENLYLSYNKIETLPGDFFNGMLSLQRLYLDYNKIKTLHENPWKQIWGELTHLDLTGNQITCDCSIKWMTELLLPCFLFGVCAEPRGLRDKKLTSLWPWDLECTVHRSSSASQNDPKSSYSTRSVPFSKYRTKCQTIMKMNHET	0.002	4	1 (1)	2	257593	0.004	3	1 (1)	1
Tt_003494-T1		RNA-binding squid-like isoform X1	332	36.1					MGDDNQYNGQNQDYGDYSDGQYGQYQQEGMETDGAMQGGDNLMDSGKGKSDDDRKLFVGGISWDTQSTDLKDYFSKYGEVTDVNIKTDPNTGKSRGFAFVTFALQESVDAVLKDTTHSVKGKQIDPKRAKAKPGLKKIFVGGLDPDMPESDIRAYFEQYGKVDTIELPVDKVKNQRRQFAFITFESEDAVKEITKQPKQMIGSKECDVKKAAPKLDPRSTRGGFMGGWGAPPAGGERGRGRGGGYQAPSWGSQGYGGYNQGYGGYNQGYGSYDYSGYGGDYSGGYGAYDYTGWGYGQSYEMGSVTGQQASGYGKTRGTGRGGTTATTYHPYR	0	27	9 (7)	40	7.68497e+06	0	27	8 (6)	16	6.44954e+06
Tt_003942-T1		disulfide-isomerase A6 homolog	370	40.7	C:GO:0005623; F:GO:0016853; P:GO:0045454	C:cell; F:isomerase activity; P:cell redox homeostasis			MVKAVTFAVFVVFYCLVAVTSALYGSNSDVIDLTSSNFNTKVIDSEDIWIVEFFAPWCGHCKSFAPEYSKAATALKGVVKVGAVDADQQKSLSGEYGVKGFPTVKIFGANKRSPQDYSGARTAQGLVDAAFRELRKNVDAKLGGKKFGGSSGGGKRNADPKDVVELTDSNFDETVMESEDMWLVEFYAPWCGHCKNLAPHWAEAATELKGKVKLGAVDATVHTILANKYGIQGFPTIKYFPAGAKDDAEEYDGGRTASDIINWALEKFAENAPPPEVKELTDGSILKNVCENSQLCIISVLPQLLDCQSECRNNYISILKKLGEKYKRNQWGWLWTEALSQEELEDSLGMGGFGYPVRVFFNFIILNNQK	0	17	7 (7)	36	3.3805e+07	0	36	13 (13)	47	3.99942e+07
Tt_003950-T1	RpL11	60S ribosomal L11	184	21.2	F:GO:0003735; C:GO:0005840; P:GO:0006412	F:structural constituent of ribosome; C:ribosome; P:translation			MKEKEKGKEKRENPMREVRIRKLCLNICVGESGDRLTRAAKVLEQLTGQQPVFSKARYTVRSFGIRRNEKIAVHCTVRGPKAEEILEKGLKVREYELRKDNFSDTGNFGFGIQEHIDLGIKYDPSIGIYGLDFYVVLGRPGFDVAHRRRRKSTIGAKHRVLKEEAMKWFQQKYDGIILPSKSGK	0	16	3 (3)	8	1.49724e+06	0	5	1 (1)	1	432223
Tt_004389-T1		ELAV 2	353	39.9	F:GO:0003676	F:nucleic acid binding			MEEESRDTRTNLIINYLPQTFTDNEFRSLFQTIGVLKSCKIVRHKATGYSYGFGFVDYNSPVDAARAIQTLNGFQMQNKRIKVAYARPSGEEIKNANLYVRGIPMSATEEDVHQVFSKYGQIIQCRILKDNIGNKNKGVAFVLYDLREQAEKASQHLNGQIFPGSNEPLSIKFAEDNAKKLQTITPKTVIQSFTTPFRGTYGGGPMRQGGFQNRYRYNPMMYGMASTTVGETGHILFVYNIGTETDEKSLWQLFSTYGNVQKVNVVREGASGISKGYGFVTMLNYEEAVLAIESLNGFLYAGKPLQFLNEFRSEHDISHSKQHLSSNTNCASFEIEIRPVITWSLPLFRIQVI	0	18	4 (4)	10	581898	0	5	1 (1)	1
Tt_004437-T1		ame: Full=Tachylectin-2 ame: Full=Lectin L10c Flags: Precursor	255	28.9	C:GO:0005576; F:GO:0030246; P:GO:0045087	C:extracellular region; F:carbohydrate binding; P:innate immune response			MKFLLVVLGFIGFLKDGITVGGESMLRGVYQDKFYQGTYPQNKNDNWLARATLIGKGGWSNFKFLFLSPGGELYGVLNDKIYKGTPPTHDNDNWMGRAKKIGNGGWNQFQFLFFDPNGYLYAVSKDKLYKASPPQSDTDNWIARATEIGSGGWSGFKFLFFHPNGYLYAVHGQQFYKALPPVSNQDNWLARATKIGQGGWDTFKFLFFSSVGTLFGVQGGKFYEDYPPSYAHDNWLARAKLIGNGGWDDFRFLFF	0	54	14 (14)	67	2.65149e+07	0	80	19 (19)	145	5.04693e+08
Tt_004447-T1	R	ras 3	185	20.9	F:GO:0003924; F:GO:0005525; C:GO:0016020; P:GO:0032486	F:GTPase activity; F:GTP binding; C:membrane; P:Rap protein signal transduction	EC:3.6.1.15	Nucleoside-triphosphate phosphatase	MREYKIVVLGSGGVGKSALTVQFVQGIFVEKYDPTIEDSYRKQVEVDGQQCMLEILDTAGTEQFTAMRDLYMKNGQGFVLVYSITAQSTFNDLQDLREQILRVKDTDDVPMILVGNKCDLEDERVVGKDQGANLARSFNNCAFLESSAKAKINVHEIFYDLVRQINRKNPEKKTKPQKKSKCIVL	0.002	6	1 (1)	1		0	42	8 (1)	13
Tt_004661-T1	Rab7	ras-related rab7 isoform X2	205	23.1	F:GO:0003924; F:GO:0005525	F:GTPase activity; F:GTP binding	EC:3.6.1.15	Nucleoside-triphosphate phosphatase	MSSRKKVLLKVIILGDSGVGKTSLMNQYVIKKFSNQYKATIGADFLTKEVMVDDRLVTMQIWDTAGQERFQSLGVAFYRGADCCVLVFDVMAPNSFKSLDSWRDEFLIQASPRDPENFPFVVIGNKIDLENRLVSTKRAQGWCQSKNNIPYFETSAKEAINVEQAFQTVAKNALAQETEVELYNEFPDQIKLTNDQKPRSDGCAC	0	12	2 (2)	2		0	19	3 (2)	4	1.40184e+06
Tt_004839-T1		von Willebrand factor type EGF and pentraxin domain-containing 1-like	1526	169.6	F:GO:0005509	F:calcium ion binding			MVAKTSLGRTWFILKICFILAAKAKDQPNGQNKQNQRLDKVAEKTFIQRNSDIVFLLDRSGSVGAANFEIEKGFVESFLTHIVIDANASRLAVISYSNTAERHLDYIKEPKNKCHLVRDLEFVEYKNSGATNMGAGFLEAQDVLKNSRDDTKKVIILLSDGLSNRGVDPVSVANKLKKIGVEIFTFGIGRFFRSELEAIASSVNHSFIYPEFREFKKLAHRIRGDLYERTWSEGGTVRDCDYLCNSPYKGMPDDPGCCDHMAKCSCGLLSGTHTCACGPGYYGLDGQLGNCKACPKGTYKNSYEVASDCTACPFKATTLREGSTSIRDCSCVTGYNGDPSTGKSCTIVECPPLQAPSHGNLLRPCGNTFGSLCLFSCEKGYELRDPNSKDRICKETGIW…	0	18	30 (30)	180	1.44757e+08	0	23	28 (28)	117	1.09177e+08
Tt_004840-T1		fibrillin-2 isoform X1	1487	166.7	F:GO:0005509	F:calcium ion binding			MTSQMYQLLWCMTIYWAAVASGWSSFLCPAPRSPVNGEHFIFENGQLVKFRCLPGYRMVGEAEMKCIRGQWSSPTPKCLVVNPHGSQPKTQTEQPASAYDESCVVVRGRSKRITPPPRINNGFAKYLRRVKNINNPYMFIIYQCRANYVFLDPNANSLYCQKQKWVGELPKCVSKDNVNEMREKNKIEVTRPVCKVSNGGCEHRCTEFNRQALCSCYPGFYLNQDKKSCLPKVKNCPKLRSPPNGRIHGSCDNSYKSTCFFSCNEGYKLNNPGSSRRVCQRSGTWSGDTPVCQLITCSPLEPPVNGRLVNYCENSYKSSCLFVCDDGYQLQDSNSARRECLISGSWSGNSTVCQRPHFIYSPPIINFQSPILNIPAKVLLVIHCKGRRPLAWSIPAEVR…	0	14	18 (18)	70	5.24375e+07	0	19	22 (22)	71	6.4047e+07
Tt_005108-T1	RpL31	60S ribosomal L31	124	14.4	F:GO:0003735; C:GO:0005840; P:GO:0006412	F:structural constituent of ribosome; C:ribosome; P:translation			MAKLKGEKKGKSALNEVVTREYTIHLHKRLHGIGFKKRAPRAIKEIKKFAEKQMGTPDVRVDTRLNKFIWSKGIRNVPYRVRVRLSRKRNEDEDSPHKLYTLVTHVAVTTFKGLQTENVDVSDN	0	55	6 (6)	33	2.46745e+07	0	17	2 (2)	3	938874
Tt_005279-T1		Blo t profilin allergen	126	13.8	F:GO:0003779; C:GO:0005856	F:actin binding; C:cytoskeleton			MSWQTYVDNHICSQIKCRLAVIAGHDGGVWASHGVQVTQNELKKIVDQMKTKPETFQGEGIHLGGQRYICLRADEDLLRGRKEGSALCVVKTGTCLIIAATADGEPPGTLNVVVEKLGEYLKYAGY	0	40	3 (3)	12	2.39666e+06	0	40	3 (3)	16	4.97296e+06
Tt_005548-T1	SBDS	ribosome maturation SBDS-like	249	28.4	P:GO:0042256	P:mature ribosome assembly			MSIFTPTNQIRLTNVAVVRMKKGGKRFEIACYKNKVMSWRSKVEKDLDEVLQTDSVFTNVSKGQVAKKEDLIKCFKTDNQVEICKEILAKGELQVSEKERQTQLESMFKDIATIVSDKCINPKTKRPYPVSMIEKSMKEVHFSVKPSKSTKQQALEVIRQLKEVIQIERAQMKLRVSIPKGKNLRTKIKELATGVDSESLENGDLEMVFSTDPGNFRKLDDLIRTETKGKGQLVVVSLKEMQEGDELLE	0	7	1 (1)	2	58928	0	7	1 (1)	1
Tt_005933-T1		somatomedin-B and thrombospondin type-1 domain-containing -like	281	31	C:GO:0016020; C:GO:0016021	C:membrane; C:integral component of membrane			MVIKEQVFGLLLTAFLVIVPVSANGSCRKANLCCPGRDSSCVVQKAPVNSIIEDLTDRPCYCDHACLKVGDCCEDFKEACRVVNCEVSNWGPWSKCDADCGPGMMGRQRFILKSPQNGGEHCPDLVQKRGCAGTRCEGTSRNEKALKETALLLSGKFSKMRTMNDTQDIRKNLRLRYPKDPAKERSQQYCVVFEVTKSHHKCSPLGEDATKLKKGERVCVACETAAMRKHLGYRCKGHGVDGKSTRWAALDASSCHGRWIKISEHSSCPCSTTAVPDFIFV	0	13	4 (4)	17	5.03892e+06	0	7	2 (2)	4	2.82122e+06
Tt_005971-T1		beta-galactosidase-like isoform X1	665	75.7	F:GO:0016798	F:hydrolase activity, acting on glycosyl bonds			MNKMNHIVLLVIFITVKLLVPLANGNEIWVEQSPSFTIDYTNNCFLKDGKPFRYVSGSMHYFRVPRSRWKDRMAKMKAAGLNALQTYVEWGSHEVQPGLFYFEGDYDLVQYIKTAQEVGLLVILRPGPYIDAERDMGGLPFWLLGVKRDIKLRSMDPEYMYYVDRWFSKLLPMIWPLLYSNGGPVIAVQVENEYGSYLACDFAYTAYLRDLFIKFLGDNIVLFTTDGYSDSDLMCGKIDGVFSTVDFGIETNVTHAFHHQRLHQSRGPLVNSEFYPGWLDHWGYPHANVSTESVCETLEEILSMDASVNIYMFHGGTSFGFRSGAGLDRVFKVTPTSYDYDAPLSEAGDPTEKYFSMRKVIGKFLPLPSEPVPGPSVKLALGTVDMKTTWFPLLDFLPY…	0	4	2 (2)	3	205586	0	17	8 (8)	11	2.06456e+06
Tt_006200-T1	TXNRD3	thioredoxin reductase cytoplasmic-like	598	65.7	F:GO:0004791; C:GO:0005623; F:GO:0009055; F:GO:0015035; P:GO:0022900; P:GO:0045454; F:GO:0050660; P:GO:0098869	F:thioredoxin-disulfide reductase activity; C:cell; F:electron transfer activity; F:protein disulfide oxidoreductase activity; P:electron transport chain; P:cell redox homeostasis; F:flavin adenine dinucleotide binding; P:cellular oxidant detoxification	EC:1.8.1.9	Thioredoxin-disulfide reductase	MAPVINHGENVKLLIERHVKDNQVMLFSKSYCGFCRQVKKIFQSLGTPYFSLELDELGNGSVIQAELTAQTGRTTVPQVFINGVYLGGCDDTHAAYSSGKLAQLLRPTDEQYEYDLIVIGGGSGGLAASKEAAKLGKKVAVFDFVTPTPKGTTWGLGGTCVNVGCIPKKLMHRAAILGESLEEAKKFGWDVPDYIQHSWNKMTEEIQSYIGSLNWGYRVALREKQVKYFNARAEFVEEHKIKAIDKRKKESFHTAKHFIIATGERPRYPNCPGAKEYGITSDDLFSLPHCPGKTLLIGASYVSLECAGFLKGIGLDVTVMVRSILLRGFDQNIAERIGSHMSEHCGIKFIRPCVPTKVEEIEPGQPGKLRVTGKMVDSEEEIVEDYDTVIFAIGRDACT…	0	2	1 (1)	5	2.0123e+06	0	30	11 (11)	27	4.56742e+06
Tt_006253-T1		transketolase-like isoform X2	621	67.5					MDEQTLQELRDIANKLRIHSINSTNASKSGHPTSCCSMAEIMSVLFFNTMRYKVTEPRHPSNDRFVLSKGHAAPILYAAWAEAGLFPVDDLLNLRKIDSDLEGHPTPRLNFVDVATGSLGQGLSCAAGMAYTGKYFDKASYRVYCVIGDGEAAEGSIWEALSFAGKYKLDNLVAIFDINRLGQSEPTAFQHEMELYKNRLESFGFNTYVIDGHDVEALCKAFNEAVTIKDKPTALLAKTYKGKGIPGIEDEENWHGKPLGEKAADAINAILKSTSNQGPLQLCPQKPLKEDAPSVDISNISLSEPPNYNIGDKVATRLAYGVALTKLGHNNERVVALDGDTKNSTYSEKFKKAFPDRYIECYIAEQNLVGVAIGCSTRRRTVPFVSTFAAFFSRAFDQL…	0	29	14 (9)	75	3.50209e+07	0	44	21 (15)	59	4.14618e+07
Tt_006257-T1	ALiX	programmed cell death 6-interacting	841	94.4					MANFIAVPFKKTSEVDIIKPLKNLISSYCTADEPVDFKESLKELNKLRINSTWRTLDKNENSLQVMCRYYDQITVLEGKCPPSDVQIPFRWKDAFDKGSFFSGSTSLTLSNLSYERICILFNIAAMESQIAASQGNDLSNDAALKFAAKYFQQACGLFQYLKITVLSIVQQEPTPDIQPDTLGALQALMLAQAQESFFHKAAADNMKDAIVAKVASQCEELYADTLKQLQKESLKQLWDKEWIPNVAGKQAAFHAVSEYHQALVCRSKKEVGEELARLQHANELMKAAETRGSTTYNFSDYVGKINRAYQEAKKDNDFIYHARIPDVKSLPPVGKAALAKPTPIPEKLSLKFQDLFSTLMPVPITQAIQAFDVRKTEVVNQEIGKMREQTQMMNGILAS…	0	3	2 (2)	6	3.1829e+06	0	6	4 (4)	6	942987
Tt_006258-T1		uncharacterized protein LOC106460542	581	64.1					MVITNGVQSNWISVTILHRGSSDNRNCGQMGICIETTKEVIYYRNGYRIVPVRSTNGPFTVLVPTDDAFYNLPPRVLSELRNNPQLLKRVLLNHIISISLNPQDLQNNMVIETNSGLKLFVSVLNGGQKVLIGGPKLVASTLTKNGYVYIINRFLDRLPAVDIVTDLKNHENLAKLASLVVTAGLEQTLREEGPYTVFAPTDKAFAALPENDLRQLLRNPEALKEVILNHVVEGVHYKKEFSSGFVLPTPRGQNLRFVVASDGTITVNNARVIESDILTGNGVIHVIDRVLVTSSEVDVFKNQFPGRGPTSGQQLKPNIAELARGMGVDTFFSWLTETGLDNVIQDGGQYTVFAPTDEAISSLPESVQSSIRDNPDRLRPLVKYHISTVRLQPQDIQNE…	0	3	1 (1)	4		0	25	9 (8)	10	5.64038e+06
Tt_006453-T1	Gprk2	G -coupled receptor kinase 2	603	69.4	F:GO:0004703; F:GO:0005524; P:GO:0006468; P:GO:0007165	F:G protein-coupled receptor kinase activity; F:ATP binding; P:protein phosphorylation; P:signal transduction	EC:2.7.11; EC:2.7.11.16	Transferring phosphorus-containing groups; [G-protein-coupled receptor] kinase	MELENIVANTVYLKAREGGADSNKGRSKKWKKILQFPHISQCIDIKDRIDVQYSYVVEQQPIGRLLFRQYCETKPHYRKCNDFLDEVANYEVTLDEYRQEVAQDVFLKYLTTESNEYVDVVNEDRIERCKENLQTASKELFVECASAVKDFLAGQPFQEFENSMYFLRYLQWKWLESQPVTAKTFRMYRVLGKGGFGEVCACQVRSTGKMYACKKLEKKRLKKRRGESMVLTEKQVLQKVNSRFVVSLAYAYETKDALCLILTIMNGGDLKFHIYNMGREPGFPVDRARFYAAEVTQGLEHLHAHGIVYRDLKPENILLDDHGHVRISDLGLAVEIPEGETVKGRVGTVGYMAPEVIDNERYTYSPDWFSLGCLIYEMIEGRAPFRARKEKVKREEVER…	0	2	1 (1)	1		0	5	2 (2)	2	843295
Tt_006467-T1		septin-1-like isoform X1	334	38.2					MASDTARQFVNPEMPGYVGFANLPNQVHRKSVKKGFEFTLMVVGESGLGKSTMINSLFLTDLYPERHIPDASEKINQNVKLEASTVEIEERGVKLRLTVVDTPGFGDAIDNTDCFRSIIQYIDEQFERFLQDESGLNRRNITDNRIHCCFYFISPFGHGLKPLDIEFMKQLHSKVNIVPVIAKADALTKKEVLKLKRRVMQEIEENGIKIYPLPDCDSDEDEDYKEQVRQLKEAVPFAVSSTTQTLDVKGRKVRGRLYPWGVVEVENPDHCDFIKLRTMLITHMQDLQEVTQELHYENYRSERLAGKAAPQKTTVYVIVIFHLPITSKGTDNFK	0	15	3 (3)	9	682253	0	28	7 (7)	14	5.71355e+06
Tt_006497-T1	ASL	argininosuccinate lyase-like isoform X1	471	53.4	F:GO:0004056; P:GO:0042450	F:argininosuccinate lyase activity; P:arginine biosynthetic process via ornithine	EC:4.3.2.1	Argininosuccinate lyase	MASCDKNQESKLWGGRFSGKIDPIMEKFNSSIEFDKRLWNVDIKGSIAYAKALKMAGLISKEERQIICDGLDQVRKEWCNNEFEIKPGDEDIHTANERRLKELIGAVPGGKLHTGRSRNDQVATDMRLWQQEEIRTLKDLMLNLIRVFVERSEMEIDVLMPGYTHLQRAQPIRWSHWLLSYAWYLKQDFDRLDNLASRNNILPLGSGALAGNPFNIDRDFLAKELGFFECSPNSLQGVSDRDFVAEFLFWGTLTSVHLSRLAEDLIIYSTKEFGFVSLADAYSTGSSLMPQKKNPDSLELIRGKAGRLLGHCTGFLAVLKGIPSTYNKDMQEDKEVMFDTCDTLKAVLQIATGALSTLTLHSKTCMEALTPDMLATDVAYYLVKKGMSFREAHSVAGKV…	0.002	4	2 (2)	3		0	20	7 (7)	13	3.66437e+06
Tt_006526-T1		tubulin alpha chain	451	50.1	F:GO:0003924; F:GO:0005200; F:GO:0005525; C:GO:0005737; C:GO:0005874; P:GO:0007010; P:GO:0007017	F:GTPase activity; F:structural constituent of cytoskeleton; F:GTP binding; C:cytoplasm; C:microtubule; P:cytoskeleton organization; P:microtubule-based process	EC:3.6.1.15	Nucleoside-triphosphate phosphatase	MRECISIHVGQAGVQIGNACWELYCLEHGIQPDGQMPSDKTIGGGDDSFNTFFSETGAGKHVPRAVYVDLEPTVVDEVRTGTYRQLFHPEQMITGKEDAANNYARGHYTIGKEIVDLVLDRIRKLADQCTGLQGFLIFHSFGGGTGSGFTSLLMERLSVDYGKKSKLEFSVYPAPQVATAVVEPYNSILTTHTTLEHSDCAFMVDNEAIYDICRRNLDIDRPTYTNLNRLIGQIVSSITASLRFDGALNVDLTEFQTNLVPYPRIHFPLVTYAPVISAEKAYHEQLTVSEITNACFEPANQMVKCDPRHGKYMACCLLYRGDVVPKDVNAAIAAIKTKRTIQFVDWCPTGFKVGINYQPPTVVPGGDLAKVQRAVCMLSNTTAIAEAWARLDHKFDLMY…	0	18	6 (5)	28	1.14109e+07	0	51	19 (10)	91	9.28485e+07
Tt_006542-T1		14-3-3 epsilon-like	239	27.3					MVEAMKYVASLDIELTVEERNLLSVAYKNVIGARRASWRIISSIEQKEENKGNEGKLEMIHQYRIKVENELREICQDILDVLDKHLIPAANSGESKVFYYKMKGDYHRYLAEFATGNDRKEATENSLVAYKAANDIAMTELPPTHPIRLGLALNFSVFYYEILNSPDRACRLAKAAFDDAIAELDTLSEESYKDSTLIMQLLRDNLTLWTSDMQHDGEGENDQQPKKDEVQDIEEQDVS	0	14	3 (1)	6		0	52	12 (4)	29	2.73791e+06
Tt_006560-T1	Chc	clathrin heavy chain 1-like	1668	191.3	F:GO:0005198; P:GO:0006886; P:GO:0016192; C:GO:0030130; C:GO:0030132; F:GO:0032051; C:GO:0071439	F:structural molecule activity; P:intracellular protein transport; P:vesicle-mediated transport; C:clathrin coat of trans-Golgi network vesicle; C:clathrin coat of coated pit; F:clathrin light chain binding; C:clathrin complex			MTQILPIRFQEHLQLTNIGINAANIGFNTLTMESDKYICVREKVGDSAQVVIIDTNNPTNPIRRPISADSAIMNPASKVIALKAMRTLQIFNIEMKSKMKAHTMNEDVIFWKWISVNTVALVTETAVFHWSMEGDSQPVKIFDRHSSLSGCQIINYRTDHKQQWLLLIGISAQQNRVIGAMQLYSVERKVSQPIEGHAAAFAQFKMEGNPEQSTLFTFAVRSAQGGKLHIIEVGQAPAGNQPYPKKAVDVFFPPEAQNDFPVAMQISPKHDVIYLITKYGYIHLYDIESGICIYMNRISADTIFVTAPHEPSSGIIGVNRKGQVLSVSVEEDNIIPYITNVLQNPDLALRMAVRNNLAGAEDLFVRKFNTLFGSGQYSEAAKVAANAPKGILRTPQTIQ…	0	1	2 (2)	6	324517	0	1	1 (1)	3
Tt_006598-T1	rl	mitogen-activated kinase 1-like	361	41.9	P:GO:0000165; F:GO:0004707; F:GO:0005524	P:MAPK cascade; F:MAP kinase activity; F:ATP binding	EC:2.7.11; EC:2.7.11.24	Transferring phosphorus-containing groups; Mitogen-activated protein kinase	MATGAKDHLSQVVRGQVFEVGPRYTNLVYIGEGAYGMVVSAEDNVAKTRVAIKKISPFEHQTYCQRTLREIKILTRFKHENIIDIRDILRPETIDQMKDVYIVQCLMETDLYKLLRTQKLSNDHICYFLYQILRGLKYIHSANVLHRDLKPSNLLLNTSCDLKICDFGLARVADPDHDHTGFLTEYVATRWYRAPEIMLNSKGYTKSIDIWSVGCILAEMLSNKPIFPGKHYLDQLNHILGILGSPTQEDLNCIINEKARSYLLSLPAKPKVPWSRLYPDANQQAVDLLDKMLTFNPHKRITVEQALAHSYFQEYYDPADEPVAEEPFRFEMELDDLPREKLKELVFEETILFKQKMQQQL	0.002	4	1 (1)	2	306478	0	32	9 (5)	16	5.04431e+06
Tt_006904-T1		26S proteasome non-ATPase regulatory subunit 4 isoform X2	391	42.5					MVLESTMVCVDNSEYMRNGDFVPTRMQVQQEAVNLICHSKTRSNPENNVGLLTLASPEVLATLTTDVGRILTKFHQLQPKGSINFLSGVRIAHLALKHRQGKNHKMRIIVFVGSPVEVDTKELVKVAKRLKKEKVNVDIINFGEDTVNTEKLTSFINAINGKEGGSSHLVTVPPGPHLMDALISSPVVQGEDGTGAVNIGGSGFEFGVDPNEDPELALALRVSMEEQRQRQEDEAKKASTQSAMEIEGSQSAPTPATGSNEETLLEKALAMSLESEGTQGTGTTSVPDFSAMTEEEQIAYAMQMSLQQAGEGGEHSVKTEIKEEPMETSDGQPKKEEEDYSEVMNDPEFLQSVLENLPGVDPQSDAIRSAMGTLTQSDQKKSKKEDKDDKK	0	6	2 (2)	4	464040	0	20	3 (3)	4	239075
Tt_007042-T1	DNASE1	deoxyribonuclease gamma-like isoform X1	430	49	F:GO:0004536; P:GO:0006308	F:deoxyribonuclease activity; P:DNA catabolic process			MGRNQQFTLFVLLVTSLYKSTISLNLPLKENPVEPPLKIAAFNVQNLGDKKLASTEEMEIIKRIILRYDVICIQEIVTKDQERLQEMIASLNLKTPNDVIYRMALSERLGRETAKEQYAYIYRDDKLSVLDEQTFPDGSDLFMRPPYIVHFSSPTTRDLSSFVAICSHTQPSSAANETHALATVYDYAHIHYENPDAIIMGDFNAGCSNIRVGDWNWIELWTREEFKWLIGHHIDTTTYVSSCPYDRFVIAGSKMGSAVIPGSPKVFDFQEEYRLTDDQTKDVSDHLPIELQLRGKMSEVAEQYLKSKTCFTIEDGRHVSNVLILYEERDTLPILVKLLTDTNNVMYVKAYSKSSNINNIINNLNLLSTTFQDFVSKETFEAVKYKVLHGGLDDASSFV…	0.002	2	1 (1)	2	369407	0	35	16 (16)	45	3.06804e+07
Tt_007322-T1	spz	spaetzle 5-like isoform X1	249	28.1					MLGLIFYFRVIGTFLVFSNFCIEDGVCFPSPNSEREKSKGEPIMPEFDSAAVIFRENEVQPLAPPVDKFGIPECARNNTSNFCEEVPDYPNAEIMNSMSKLSKDAFKVVFSTGLTGRSTYPIGDLSETPLCQSQTRTFRPKAGKTSAKEWVYVVNNIHYEQVVTAETCQDDGGSCRYVSDNLPLGYRSFCRQRYAFKTLLAIKPEDREPYKENFRFPSCCTCYVTVSPEYRRKFVTIHQTSGEPSSGIV	0	30	7 (7)	29	8.5926e+06	0	45	9 (9)	39	4.47276e+07
Tt_007449-T1		nucleolin-like isoform X2	454	51.1					MVVKTNRQTFQTVMANKKKGGKATEALKKELEKKKLKEEEEEMELEDSDDEMDEEDSDFDSDLDDEEDEDEDDSLEEESEDEKPAKGKNALATKSPGKTATPVQKKQDKLLTPAQKKKAETPKGKGQTPVAKKGMEIKEMEEQEDDDKDGDEDDESFEDEDESGEDKKVVKDKPMTPAQRKIQGKQQMSAQKKIQGKADTPSQKKTETPKGVKRKGQDVKDQNAKKTKGLDDEAHRLTEERIRERNYRTLFIGQLPASTTVDEVKALSPDITNCRIPMRSSRKGTVYAFAEFSSEKKAEENYEKLQKKTVSGKQIVIDYTGEKSSNYKKSPVAKKTMDKKVLFIGGVASDITVEDLAKVFPNSAQVDFSNPPGSYPGRNVYVKFDTEEAAKEAFLKAEN…	0	21	7 (7)	24	1.09679e+07	0	14	4 (4)	5	3.13915e+06
Tt_007532-T1		slit homolog 2 -like	371	42.5					MKIILLVLVLTYVQHRGRVGSSCPKEDISPWFCTDIPIRHLYTIILCNKPECKLHLEKPSDFARNQILDKVILFNITRDEGENSWKLTLPPQWLSMSRVRELEIRNTPLSNCFLCNNPFVGQQLYLKKLVFSNCSLKGKLCNQCETLLKTKITTTAKPRRRYGYYIDRDISTTSEPEYEYKYVPGGVHMNGLKTVKNLEILELSFNEIDEIYNDTFPVELSNLETLVLSHNVISVLSTNSFTNLVSLKEIDLSYNKLEHLSRDIFSSPASNLQVLNLKGNGISVLPENIFSLMPVLREANLALNFLQFLPLRTWNHTMDSIKVIDVSGNFIICDCDIKWIATKHQKVTGYCSEPWNMSRLHLKQGANSLTC	0	14	5 (5)	38	8.62168e+06	0	15	5 (5)	10	2.46261e+06
Tt_007803-T1		guanine nucleotide-binding G(I) G(S) G(T) subunit beta-1	340	37.3	P:GO:0007165	P:signal transduction			MNELDSLRQEAETLKNAIRDARKAACDTTLVQATANMEPVGRIQMRTRRTLRGHLAKIYAMHWGSDSRYLVSASQDGKLIVWDAFTTNKVHAIPLRSSWVMTCAYASSGSYVACGGLDNICSIYSLKTREGNVRVSRELPGHTGYLSCCRFLDDNQIVTSSGDMTCALWDIETGQQCTSFTGHTGDVMSLSLSPDMKTFVSGACDASSKLWDIRDGMCKQTFPGHESDINAVTFFPNGYAFATGSDDATCRLFDIRADQELAMYSHDNIICGITSVAFSKSGRLLMAGYDDFNCNVWDSMKAERAGVLAGHDNRVSCLGVTEDGMAIATGSWDSFLKIWN	0	4	2 (2)	6	585416	0	7	3 (3)	5	3.37244e+06
Tt_007808-T1		6-phosphogluconate decarboxylating	484	53.4					MSSEKADIALIGLAVMGQNLILNMNDHGFVVCAYNRTTEKVDKFLKNEAKGTKVIGAHSLEEMVAKLKKPRRVMMLVKAGQAVDDFIDKLVPLLEPGDIIIDGGNSEYTDSRRRCAALKERQILFVGSGVSGGEEGARYGPSLMPGGAPEAWPHIKEIFQAIAAKVNEEPCCDWVGEDGAGHFVKMVHNGIEYGDMQLICEAYQLMKDALELSHDDMSEVLAEWNKGELNSFLIEITSDILKYKDTDGEPLITKIRDAAGQKGTGKWTAISALDNGIPVTLIGESVFARCLSSLKDERIEASKVLYGPSKTTYQGDKKEFTENIRKALYASKIVSYAQGFMLLREAAKIFDWNLNYGGIALMWRGGCIIRSVFLGNIKTAFDKNPKLSNLLLDEFFRDA…	0	10	3 (3)	8	2.16469e+06	0	42	14 (14)	30	1.68401e+07
Tt_007897-T1	Cdc42	cdc42 homolog	191	21.4	F:GO:0003924; F:GO:0005525; P:GO:0007264	F:GTPase activity; F:GTP binding; P:small GTPase mediated signal transduction	EC:3.6.1.15	Nucleoside-triphosphate phosphatase	MQTIKCVVVGDGAVGKTCLLISYTTNKFPSEYVPTVFDNYAVTVMIGGEPYTLGLFDTAGQEDYDRLRPLSYPQTDVFLVCFSVVSPSSFENVKEKWVPEITHHCQKTPFLLVGTQIDLRDDAATIEKLAKNKQKPITYEQGEKLAKELKAVKYVECSALTQKGLKNVFDEAILAALEPPEQKPKRRCILL	0	29	5 (5)	14	1.62498e+06	0	32	5 (5)	20	1.17929e+07
Tt_007911-T1		4-hydroxybutyrate coenzyme A transferase	480	52.3	F:GO:0003986; P:GO:0006083; F:GO:0008775; P:GO:0019679	F:acetyl-CoA hydrolase activity; P:acetate metabolic process; F:acetate CoA-transferase activity; P:propionate metabolic process, methylcitrate cycle	EC:2.8.3.8; EC:3.1.2.1	Acetate CoA-transferase; Acetyl-CoA hydrolase	MASRSVVVALNGIRFTLRSFPRQNVLSSLVIKRTFYDYCKEPFQPLNREPKWMSAEEAVQIIKSGDTVFVHGAAATPRKLVPAMVEHAKKEKLKNITVCHIHTEGAAEYNHPDCEGIFRSNSFFVGGNCREAINSGRGDFVPIFLGEIPFLFHREIVKPDVALVQVTPPDNHGYCSLGSSVDCTRAAVQHSKVIIGQVNPRLPRTFGDGLIHKSHFDALVEGQVELPELKPPKLTDVELTIGKLIADNLVVNGATLQMGIGSIPDAVLASLKGHKDLGVHSEMFSDGVVDLVESGCITNHQKKIQPGKIVGSFTIGTRRLFDFMDNNPFIMMMDVGYVNSIPIIATNPKVTAINSCIEIDLAGQVVSDSIGTRIYSGFGGQVDFLRGAAVCHDGLGKPI…	0	25	12 (12)	41	1.38667e+07	0	29	11 (11)	23	1.48596e+07
Tt_007965-T1	PEX10	tumor p63-regulated gene 1	321	36.2					MSEFKDIGLNDPENKRALSANSDMDKLTDDFQDADFKGGTLSLSQDQDLLTNTSSMSNPSSVASTTPLAAEDSANANINGQTNLRNVPVRPHPSSRLVTEEDLRTFFAVRDGALENAAERCRPVVLENIDGELRGVWLLTEIDHWDNEKERLIFLTDHTLFSLKYDFIAQKLLEYKRYPLTQFDQVTIGELKYPEKSLMPPRNQNGIKCLWNQGQPLPILKNWNPWSREIPWITFTSHPLVCQEGGKKSAFDVNDFTRTFIQQIERKGTGNPEPPVTGEGAVKTCQVTYKPIIIENYAGLASAFHNANQFGFFKLHGRISF	0	20	6 (6)	15	4.66471e+06	0	22	7 (7)	12	3.5659e+06
Tt_008017-T1	AChE-1	acetylcholinesterase-like isoform X1	564	63.8					MIGTTSTILYFIFHLELITAVNLEPDLPESSVVHTTLGMVRGLTTHTATGKNVDVFWGIPYAEPPTGYLRFQRPQPKKPWKGVLNATTKPNSCFQIVQSSLTNFSEATTWIVKTPLSEDCLYLNIWVPHPQPQKAPVMVWIHGGGFYIGSSTLDVYDGGILSSEENVIVVTMNYRLASLGFLYFNRSDAPGNVGLLDQVMALEWINKNIAHFGGDSEKVTIVGESAGASSVSLHLLSPLSKGLFNNAIMESGSVFNSWSIHDHETAISQGLILAEVLNCSHDFGELDSTMECLRNKDPSDLVNNDWMAIKFLDFPFTPVVDGIFLTDSPETLLKENITYRRNLLIGNNQYEGYFLLFFNFPEIYNKEKVGVTRGEFRRLVETVVPNANTFQRKAVIHQY…	0	6	2 (2)	3		0	4	2 (1)	3
Tt_008063-T1		F-actin-capping subunit beta	224	25	F:GO:0003779; C:GO:0005737; C:GO:0008290; P:GO:0051016	F:actin binding; C:cytoplasm; C:F-actin capping protein complex; P:barbed-end actin filament capping			MTEQQLDCALDLMRRLPPQQIEKNLSDLIDLVPSLCEDLLSSVDQPLKIARDKQVGKDYLLCDYNRDGDSYRSPWSNTYDPPLDDGAMPSERLRKLEVDANQAFDQYREMYFEGGVSSVYLWDLDHGFAGVILIKKAGDGSKKIKGCWDSIHVVEVQEKSSGRSAHYKLTSTAMLWLQTNKPGSGTMNLGGSLTRQVELDAAVSEASPHIANIGRMVEVILLMA	0	9	1 (1)	4	199777	0	9	1 (1)	2	716899
Tt_008213-T1	RPS20	40S ribosomal S20-like	121	13.8	F:GO:0003735; P:GO:0006412; C:GO:0022627	F:structural constituent of ribosome; P:translation; C:cytosolic small ribosomal subunit			MSTFKDTGKPLDDAQSHRIHRIRITLTSRNVRSLEKVCAELIQGAKEKELKVKGPVRIPTKVLRITTRKTPCGEGSKTWDRYQMRIHKRLIDLHSPSEIVKQITSINIEPGVEVEVTIADV	0	21	2 (2)	6	3.59468e+06	0	21	2 (2)	2	993560
Tt_008229-T1		techylectin-5A-like isoform X5	62	6.8					MKSLTYSKVLLHIMCLGLTGILLSEPVGGETSDVSRYDLNDILDALPTTVWGMVNVIKEKMK	0.009	35	1 (1)	1		0	35	1 (1)	10	9.76992e+06
Tt_008580-T1		Kunitz and NTR domain-containing -	927	104.4	F:GO:0004867; C:GO:0005576; P:GO:0006508; F:GO:0008233; P:GO:0010466; P:GO:0010951; F:GO:0030414	F:serine-type endopeptidase inhibitor activity; C:extracellular region; P:proteolysis; F:peptidase activity; P:negative regulation of peptidase activity; P:negative regulation of endopeptidase activity; F:peptidase inhibitor activity			MKFSILILCSLICQTIALTLSAPRNLAVTESSTLSHSLELRWDPPLSHDNDIVGYTIYYIIDTPGSHGSWEIETTKGNETFATVPQPHQVTSESRYVFRLQARGKNGAGPPSDDFIFDTKEISGDHTTSEVTTSDDECNLPKDSGPCLAYLRNYYYNSRHQQCEEFIYGGCRGNKNNFKTKEECEERCIKGHAEVQPDQTDNALLSVPRNLVVTASRTLSRVLDLHWDPPLNHGEGITGYVIYYSVDTPGTPNEWNEITTEGSESFTTIQAPHSANDRSKFVFRLQARGRHSNGPISEDFVYDFDKVFSDDRSGLENSLNFCNLPSDTGRCLAYIQRYYYNPDSKKCEEFIYGGCEGNDNNFQTKAECEYTCGREEEYSPVLPPINNVPLSAPKNLVVT…	0	13	9 (9)	18	4.13678e+06	0	3	2 (2)	2
Tt_008608-T1	Arp1	clone 403-like	376	41.8	F:GO:0005524; C:GO:0005737; C:GO:0005856	F:ATP binding; C:cytoplasm; C:cytoskeleton			MCEEDVAALVVDNGSGMCKAGFAGDDAPRAVFPSIVGRPRHQGVMVGMGQKDSYVGDEAQSKRGILTLKYPIEHGIVTNWDDMEKIWHHTFYNELRVAPEEHPVLLTEAPLNPKANREKMTQIMFETFNTPAMYVAIQAVLSLYASGRTTGIVLDSGDGVSHTVPIYEGYALPHAILRLDLAGRDLTDYLMKILTERGYSFTTTAEREIVRDIKEKLCYVALDFENEMTTAASSSSLEKSYELPDGQVITIGNERFRCPEAMFQPSFLGMESCGIQETTFNSIMKCDVDIRKDLYANTVLSGGSTMFPGIADRMQKEICALAPSTMKIKIIAPPERKYSVWIGGSILASLSTFQQMWISKQEYDESGPSIVHRKCF	0	64	25 (1)	590	3.9184e+06	0	80	29 (4)	773	1.25234e+09
Tt_008626-T1		RNA-binding squid-like isoform X1	329	36.2					MGDDNQYNGLNQEYNGYNEGQYGQYQGGMESDVMQGGDNEIESSGQGKADDDKKLFVGGVSWDTQTTDLKEYFSKYGEVTDVNIKTDPNTGKSRGFAFVTFASQDSIDAVLKDGTHTVKGKQVDPKRAKARPGIKKIFVGGLDPDMSESDIRSYFEQFGKVETVELPMDKTKNQRRQFVFITFETEEAVREVTKQPKQMIGNKECDVKKATPRPDPRSMRGGFMGGWGTPRGGNNGGRGRGRGGYQTQSWDSQGYGGYNPVYGSYNQGYGNYDYSGYSGDYSGGYNAYDYSGWGSYGQSYGQQPSGYGKTRGAGRGGTTTATTTYHPYR	0	21	5 (4)	16	2.30078e+06	0	19	5 (3)	13	1.56926e+06
Tt_008727-T1	His2Av	histone -like	128	13.4					MAGGKAGKDSGKAKAKAVSRSARAGLQFPVGRIHRHLKSRTTSHGRVGATAAVYSAAILEYLTAEVLELAGNASKDLKVKRITPRHLQLAIRGDEELDSLIKATIAGGGVIPHIHKSLIGKKGSQKTG	0	61	8 (6)	195	1.20407e+08	0	54	6 (4)	94	7.20898e+07
Tt_008935-T1		lysosomal alpha-mannosidase-like	600	67.1	F:GO:0005488; P:GO:0005975; F:GO:0016798	F:binding; P:carbohydrate metabolic process; F:hydrolase activity, acting on glycosyl bonds			MMNSSPNMYCTTSCIFLICSPGTEKQHVANDYSQRLASGIRQCEVTVNDAYRKLLPQAKTKPPTQIFCNYLNISQCNITEGEQPVAITIYNPLARPINHYIKLPVTSNAYKVIGPKGEPVAAQLVPIPPAVQKIPGRVSKATSELVVNVKLPPLGFSTYFIKKSNNSHLAKEQMSEVFESRSEEEIVGNEEVAVTIDGKTGLLKSMNLSNGMKFPIKQAFYWYQGMNGNNSEFQFRASGAYIFRPNGTTPQPVSQNVTVTVVKGALVKEIHQTYSPWLSQVIRIYNSSRFLEMEWLVGPIPVKNNTGKEIITRFDTGLQTEKTFYTDANGRQVLKRVRNERPTWSLNISEPVSGNYFPVNSRIYLKDKSKDIQLTILTDRSQGGSSLNDGSLELMVHRR…	0.002	3	2 (2)	3	477853	0	9	4 (4)	4	847008
Tt_008947-T1	GstD1	glutathione S-transferase 1-like isoform X1	216	25	F:GO:0016740	F:transferase activity			MTTKPIDFYYLPISPPCRAVEMVAKHLNVSLNKKLVNVMAGEHMKPEFLKINPNHTIPTIDDNGFILWESRPIMTYLWNQYSTNDSLYPTDPKNRAEVEKMLHFDIGTLYKSIAEYILPVLLHGEPPNTEKEKIMRQKIKILDDILEKQPYVAGQNLTLADLSILAGITFPEVIECNLGEFSNIQLWIKKMKAELPYYEEFITQPIEEFKGLKANK	0	22	5 (5)	24	2.75426e+06	0	38	7 (7)	28	1.247e+07
Tt_008952-T1	RpL27	60S ribosomal L27-like	136	16.2	F:GO:0003735; C:GO:0005840; P:GO:0006412	F:structural constituent of ribosome; C:ribosome; P:translation			MGKIMKSGKVVLVLNGKYAGRKAVIVKNNDEGTSDKPYGHAFVAGIDQYPRKVTRRMSKKRQKKYNKIKPFLKVFNYNHLMPTRYMVDIQFDKSVINKEVWKDPAKRRKARREVKAKLEERYKTGKSRWFFQKLRF	0	38	4 (4)	22	5.30471e+06	0	26	2 (2)	2
Tt_009215-T1		10 kDa heat shock mitochondrial-like	142	15.7	F:GO:0005524; P:GO:0006457	F:ATP binding; P:protein folding			MAAPGKRLIPLLNRVLVERFTAEMKTKGGIMIPETAQTKVQSATVVAVGPGRQNEKGELIPVSLKVGDKVLLPEWGGTKLEIEEKRIKKLRSDKIETANLLSRKMSEQYIFDMILDSFGIMSCINTTTVYPSQPFSPFVSVG	0	29	4 (4)	10	1.01647e+06	0	14	2 (2)	2	2.32207e+06
Tt_009450-T1	ATPsynbeta	ATP synthase subunit mitochondrial	524	56.7	F:GO:0005524; C:GO:0005753; F:GO:0016887; P:GO:0042776; C:GO:0045261; F:GO:0046933	F:ATP binding; C:mitochondrial proton-transporting ATP synthase complex; F:ATPase activity; P:mitochondrial ATP synthesis coupled proton transport; C:proton-transporting ATP synthase complex, catalytic core F(1); F:proton-transporting ATP synthase activity, rotational mechanism	EC:3.6.1.3; EC:3.6.1.15	Adenosinetriphosphatase; Nucleoside-triphosphate phosphatase	MLNVLGRTCSCILKTAKPAVPLSKVQETSFKFIPTLCSKHQNYATEAATSAKQSPNYGKIVAVIGAVVDVQFEDNLPPILNALEVKGRKPKLILEVAQHLGENTVRTIAMDGTEGLVRGNEVLDTQSPIKIPVGPETLGRIINVIGDPIDERGPVNTDKYSAIHQEAPEFVEMSVEQEILVTGIKVVDLLAPYSKGGKIGLFGGAGVGKTVLIMELINNVAKAHGGYSVFAGVGERTREGNDLYHEMIESGVISLKDKTSKVSLVYGQMNEPPGARARVALTGLTVAEYFRDEEGQDVLLFIDNIFRFTQAGSEVSALLGRIPSAVGYQPTLATDMGTMQERITTTRKGSITSVQAIYVPADDLTDPAPATTFAHLDATTVLSRGIAELGIYPAVDPLD…	0	15	5 (3)	16	1.16098e+06	0	8	3 (3)	6	1.18686e+06
Tt_009659-T1		uncharacterized protein LOC111089099	509	59.5					MFLLNSKVWCRSCYKLLLVAEMVSRFMGQPIQMVANKVFSQDLQHVSRPTPFPIRDVDPSEVNVVQMETLVNNRTLVTNTSFSHLMNITYTKQMRKRERMRQNWIERLKSLILRGVGISQEPNVTTTYPKKILNHFEKVVDKIDKINSKEESMRFEKLQSFYPSCSIPEDIDRNLWNDARSFNIYYNLSFMKTTSQAKIKLAKLRLFKNKDLMFNDLNKNPGLLHLPLPHLKIPRLSERNTGLTVSLYQYKRPLNNASNEADKTYLYSRIIAGNYQGWIEFDVTSSFQFWSKMPQRNHGFSIEIEDSYEGNHNPNLFLVNFNCDEEDANATATIESPFPNIEEIYLDMEENDTAFFGNDTFPTLDFRTIEMSPELVQTEEPQPTIRTLSKRQAEDETHI…	0	4	3 (3)	5	2.75771e+06	0	3	1 (1)	1
Tt_009787-T1		carboxypeptidase E-like	502	56.4	F:GO:0004180	F:carboxypeptidase activity			MLGKTVTMIICVLNVLFNLAAALSNSIPLSPDFKFKHHDNRELNDVLKQVAERCPDITRVYQLAEKSVLGWPLSVIEISDKPGIHEPLEPEFKYVGNMHGNEVLGREMLLALANYLCWQYRKGNEEIQTLVNNTRIHILPSMNPDGWQISTEQKGGKDWLIGRSNANGVDLNRDFPDLNEILYSEEELPIHQTHHYFLGSQMIDHMLQPETRAVMMWILNNPFVLSANLHGGALVANYPYDESPSGKTQEYTATPDDQTFKHLAHSYALVHKTMSGKQHVNCGGDDFTHKGGITNGAAWYSVAGGMQDFNYLGSNDFEITLELGCNKYPSEEQLPKEWDINSKALLNFMWQAHIGIKGIVREAGSGRPLQNAVIKVHNITNGKDSPINHDVTSVRGGEY…	0	21	8 (8)	28	1.37986e+07	0	31	13 (13)	31	1.48317e+07
Tt_009850-T1	14-3-3zeta	14-3-3 zeta-like	245	28					MDKDELVQRAKLAEQAERYDDMAAAMKQVTETGVELSNEERNLLSVAYKNVVGARRSSWRVISSIEQKTEGSERKQQMAKEYREKVEKELREICYDVLGLLDKYLIPKASNAESKVFYLKMKGDYYRYLAEVATGDQKNSVVDESQKAYQEAFDISKTKMQPTHPIRLGLALNFSVFYYEILNSPDKACQLAKQAFDDAIAELDTLNEDSYKDSTLIMQLLRDNLTLWTSDTQGDGDEPTDTQEN	0	27	7 (1)	38	2.02254e+07	0	49	11 (1)	49	1.76245e+06
Tt_009902-T1	eIF3-S4	complement factor B-like isoform X2	654	72.8	F:GO:0004252; P:GO:0006508	F:serine-type endopeptidase activity; P:proteolysis			MMHWLSFTSSFLLFLQLSFGSKCPPLPISEIKHGSLVRKNHMHVVVKCDKGYFLGGGQRDLICRDGKWNERIPNCIFADMQCHPPPYVPHSNVIGDNFETGQTVLYVCHEGYSLVKGNGKMTCKVGGKWGVRKPICEATVQDVKSVANRLGSSFINKLGSFSSTSAARALGPNIEFLGLEMVFVIDRSSSISSTDLNRAKVFLNYLVDQFGVNNTVNKGGTRLAAVTFGTKAELLFNLNNKSVDTPDKAKTIINKIPPAGGGSDMGDAFSKVFVDVTPVLRKEAKRALFLVTDGEPTDQDISPEEYISNLKKGKDFEIFIIGIGTTINPQRLRAMVSEPSKHHYFQLQKFEDFDNILWFIKNNPTEAPPPGPEKCGYLPKKDEEVQEKNTNVLSDWPWI…	0	50	36 (36)	313	3.45847e+08	0	52	33 (33)	262	5.73615e+08
Tt_010155-T1		uncharacterized protein LOC106471641	253	28.6					MIGIRLRIVLLSLVLIAVANGQEYGKKYEDAISRGAKYESVMSKLEAILTRLKSDKNSVMQNSVNKDYYSKVKTLVSNTAKLLQLNREDPLTLDRRTLQYDIKNHKGQLRLKRGQLFGLSTFHPVGEPRVTQIGFKTVTSAWLEWRNLQVTYLLATKLYGVYIIGEVNARVKDPVQVFIEISEDRVKASSFAVLTAYEPSKVGTISVKVPSLNFLGVSRFKMEKLIAEGIRDAITEALQGTVRRYLKLSLKKY	0	24	8 (8)	28	9.87385e+06	0	63	18 (18)	27	8.07199e+07
Tt_010368-T1		elongation factor 1-alpha	462	50.7	F:GO:0003746; F:GO:0003924; F:GO:0005525; P:GO:0006414; F:GO:0016779	F:translation elongation factor activity; F:GTPase activity; F:GTP binding; P:translational elongation; F:nucleotidyltransferase activity	EC:3.6.1.15	Nucleoside-triphosphate phosphatase	MGKEKTHLNIVVIGHVDSGKSTTTGHLIYKCGGIDKRTIEKFEKEAAELGKGSFKYAWVLDKLKAERERGITIDITLWKFETPKYYITVIDAPGHRDFIKNMITGTSQADCAVLIVAAGTGEFEAGISKNGQTREHALLAYTLGVKQMIVGVNKMDTTEPPYSEKRFEEIQKEVSAYIKKIGYNPATVAFVPISGWNGDNMLEPSSNTSWFKGFKIERKGQVSEGKTLLQALDCAEPPSRPTEKPLRLPLQDVYKIGGIGTVPVGRVETGILKPGMVVTFAPAMITTEVKSVEMHHESLTEALPGDNVGFNVKNVSVKELRRGYVAGDSKNDPPQSTADFIAQVIILNHPGQITNGYAPVLDCHTAHIACKFKEIREKCDRRSGKKLEDNPKFIKSGDA…	0	40	20 (5)	162	1.87222e+08	0	36	14 (3)	74	1.04675e+08
Tt_011265-T1	HMCN1	hemicentin-1-like isoform X1	297	32.4	F:GO:0005509	F:calcium ion binding			MKDGEFVSPLNTPGVNILLIYILSIQIAWMKDGEFVSPLNTPGVNILLNGRKLQINRTRVFDTGSYKCIASNVAGRGEQQFDVSVLVPPSLDGPETDYKEVVISQRTVLECLVTGLPTPKITWKKDGTIFEPPLYVNPQSRRGDIVSDVQLMDSGQRILINHAKNDDAGQYTCEARNIAGEVSKEINLDVLVPPRIQAQEKVENAKVKEGDSIVLECEASGHPSPVITWMKNGQLLSSFSSPDTIILPNGHLLVDKAAIRDGGRYTCLAANNAGSAEKDVNLKVLGWLLQLLTVLLL	0	33	7 (7)	33	1.05819e+07	0	32	6 (6)	12	3.99949e+06
Tt_011471-T1	Hml	hemocytin-like	1889	210.9					QNEYGVCRKPELKAIECRLSKTKHDYREVRQKVTCDIDTGLSCYNKHQIGKCHDYEVRFFCAGDECPGTVPTKTKKKPRPKITIIPPTKPTPCVSSWTPFFNTDSPTSGEGDIELLVNIQKRGSVCFDKYIAGIECKTRIGKTVVDYTESGDFGVKCSLAVGLVCENSLQKKGRRCHDYSIRFFCSCVKPKTTTPQPVITTSPCPLTQVYDDCGYRCNQTCQSFFNLLVKEQKCVLGTPSDLCIPGCRPTKTCSAPYVWRDYSTCVRKEECTCVLPDGTILSPGRVIDYNCQKCQCQDNHLICIPIPHCGETPTKEVFTQPTPTHAEQNRCWTNWINIDSPLSGSGDMEDLTEIRLKYSLCSNPLAIECRVVSSKESSVDAGQNAECDLKTGLHCWNNV…	0	48	108 (108)	1388	2.88834e+09	0	38	68 (68)	342	5.93156e+08
Tt_011472-T1	Hml	von Willebrand factor-like	2061	229.7	P:GO:0010466; F:GO:0030414	P:negative regulation of peptidase activity; F:peptidase inhibitor activity			MMAWKLAFCCLVLVLLLEIQLVNSYTKGRHSKSLPYVRRGIKGFFRRNKCDNPAPPVNGQMRCQLSHRNRRVYECVATCIKGFEFPGKLAEMKRICNSFDGSWRPITEFPECEAICDPPCINGGKCAGNNHCICPPNFRGSSCNYDTSLCNPSDSLKFIGSWQCNHTQQETKCSLNCAQGTEFESQPADIYTCSVEGTWNPATAPKCIPVNVIHPTGSPYFPADKIKTIGVEEQKHSGVCATWGQFHYRTFDGSMYSFQGPCAYVLAKDSRDNTFSIHVKNDPSCVSSKTCHRLIVIYLGGDKYKLMHSNKKATVYHGTEEIPVPSTSGSLLLEKIAGYLVIKSSLGFSLKWDGKDTVLLSLASSLKNNTSGLCGRFDGSKENDFELVNGEAGGSVSAF…	0	31	66 (66)	379	4.779e+08	0	32	64 (64)	251	3.05681e+08
Tt_011483-T1		U6 snRNA-associated Sm LSm7	108	12	P:GO:0000398; P:GO:0000956; F:GO:0003723; C:GO:0005688; C:GO:0005689; C:GO:0071004; C:GO:0071013; C:GO:1990726	P:mRNA splicing, via spliceosome; P:nuclear-transcribed mRNA catabolic process; F:RNA binding; C:U6 snRNP; C:U12-type spliceosomal complex; C:U2-type prespliceosome; C:catalytic step 2 spliceosome; C:Lsm1-7-Pat1 complex			MIMSQSGTDKEKRRKEGIVDLSKYLDKPIRVKFQGGREATGILKGYDPLLNLVLDNTTEFLRDPDDPFKLTEDTRTLGLVVCRGTAVVVVCPMDGLESIPNPFIQHDG	0.002	14	2 (2)	3	475848	0	30	2 (2)	3	776631
Tt_011644-T1		4-trimethylaminobutyraldehyde dehydrogenase-like	519	56.2	F:GO:0008802; F:GO:0019145; F:GO:0047105; P:GO:0055114	F:betaine-aldehyde dehydrogenase activity; F:aminobutyraldehyde dehydrogenase activity; F:4-trimethylammoniobutyraldehyde dehydrogenase activity; P:oxidation-reduction process	EC:1.2.1.47; EC:1.2.1.8; EC:1.2.1.5; EC:1.2.1.19; EC:1.2.1.3	4-trimethylammoniobutyraldehyde dehydrogenase; Betaine-aldehyde dehydrogenase; Aldehyde dehydrogenase (NAD(P)(+)); Aminobutyraldehyde dehydrogenase; Aldehyde dehydrogenase (NAD(+))	MFKLGFSSFFILPRQHIKIMKQSFSSTALQGPFNYINGERVTSVDSTHDIKVLKPATGEVLCTIPNSGQQDVNKAVQAARTAFTQWSALSGLERGRFLISAAQKVRERLDELAKLEVLDTGKPVWEARVDLAGCAEHLEYYGGVAATVGGLHYQLPGGNFAVVRREPLGVVGGIGAWNYPFQTISWKAAPALACGNTFVYKPSQFTPVTSVVFGEILTEVGVPPGVVNVIQGAGSTGEALCQHPDVAKISFTGSVPTGQKIMKASADGMKRVTLELGGKSPMLVFADADLTEAVKATMLGNFLTQGQVCSNCTRVFVERPILKDFQEKLVSACEKMVIGDPFNDETTVGATITREHAEKVLHYIEEAKQQGARLLCGGKRLNLSDPKLAGGYYLSPCVL…	0	4	1 (1)	1		0	4	1 (1)	2	252510
Tt_011709-T1		RNA-binding 45-like	522	57.8					MADYGGYWKGYTGGYGENASNSKSSDRDRKDRHDGAPPHSRLFILCDKQTTEEEIRETFEKFGRIEDIWVVKDRSTNKPKGVAYVRFSKTSEAAIAMETMDGKRIRENQIPMKVRIAHNREDGSKKEANEEERVLRLFVMVPKTYTEDDLKKDFEQYGELDRVNIVRDHSTGDSKGFGYVKYLKMSSAANAFENCPKTFKAKFADPRPSSHSQRDKNLGLGGGVWGFDASQGAPPPPPPPPQSTPLIGHFPGTLNTGFDATQCMPATVADDILRVNVAVPQAASYEQLYHLFDLIPGLERCDVNSGLASLKFSNPEAAAWARQKICRLEYPPGFMLQIVDISTGGGVNARPDTMLGSAPAGQLTNHIASLVEKISEATNVLKNVGFHVNNSPGLMPNTG…	0	7	3 (3)	5	632058	0	5	2 (2)	2
Tt_011825-T1	ATPsynbeta	ATP synthase subunit mitochondrial	521	56.5	F:GO:0005524; C:GO:0005753; F:GO:0016887; P:GO:0042776; C:GO:0045261; F:GO:0046933	F:ATP binding; C:mitochondrial proton-transporting ATP synthase complex; F:ATPase activity; P:mitochondrial ATP synthesis coupled proton transport; C:proton-transporting ATP synthase complex, catalytic core F(1); F:proton-transporting ATP synthase activity, rotational mechanism	EC:3.6.1.3; EC:3.6.1.15	Adenosinetriphosphatase; Nucleoside-triphosphate phosphatase	MLSVFRRTSSDLLKTTKPAVSLSKLQENIFKIIPTLCSTNKKYATGAAKPGQNYGNIVAVIGAVVDVHFEDNLPPILNALEVEGRKPKLILEVAQHLGESTVRTIAMDGTEGLVRGNRVLDTKSPIKIPVGPETLGRIINVIGEPIDERGPVTTDKYSAIHQDAPEFVEMSVEQEILVTGIKVVDLLAPYSKGGKIGLFGGAGVGKTVLIMELINNVAKAHGGYSVFAGVGERTREGNDLYHEMIESGVISLKDKTSKVSLVYGQMNEPPGARARVALTGLTVAEYFRDQEGQDVLLFIDNIFRFTQAGSEVSALLGRIPSAVGYQPTLATDMGTMQERITTTRKGSITSVQAIYVPADDLTDPAPATTFAHLDATTVLSRGIAELGIYPAVDPLDSTS…	0	14	5 (3)	16	1.99777e+06	0	6	2 (1)	2
Tt_012127-T1		26S proteasome non-ATPase regulatory subunit 11	421	47.3	C:GO:0000502; P:GO:0043248	C:proteasome complex; P:proteasome assembly			MAGAIEVLERAQDVSRTDKQAGIDMYNKIVCSQDGVGNDEAIKVKEQSILELGQLLSKSGRAEELGELIRSTRPFLNNISKAKAAKLVRALVDMFLDMEAATGFEVELCKECIEWAKQEKRIFLRQSLEARLIALYYDTGKYTEALELGSILLKELKKLDDKNLLVEVQLLESKVYHALSNLPKARAALTSARTTANAIYCPPKLQAALDLQAGILHAADERDFKTAFSYFYEAFEGYDTLDNPKALIALKYMLLSKIMLNVPDDVQSIVMGKLALRYAGSETEAMKKVAQASHKRSLADFKKAVKDYRKQLVEDPIIRAHLDTLYDTMLEQNLCCLIEPYSRVQVEQIAKSIKLPLDTVEKKLSQMILDKKFNGILDQGEGVLIVFEDMTRDKTYEAA…	0.002	3	1 (1)	1	138695	0	2	1 (1)	2	281210
Tt_012196-T1	mats	MOB kinase activator 1B	224	25.8	F:GO:0016301; P:GO:0016310	F:kinase activity; P:phosphorylation			MSFFFGGRSSKTFKPKKNIPEGTHQYDLMKHAAATLGSGNLRLAVMLPEGEDLNEWVAVNTVDFFNQINMLYGTITEFCTEESCPVMSAGPKYEYHWADGQTVKKPIKCSAPKYIDYLMTWVQDQLDDETLFPSKIGVPFPKNFLSIAKTILKRLFRVYAHIYHQHFSEVVQLGEEAHLNTSFKHFIFFVQEFGLIEKRELAPLQELIEKLTSKDKEKDSNPSR	0.027	5	1 (1)	1		0	20	4 (4)	5	338861
Tt_012394-T1	ATPCL	ATP-citrate synthase-like	1091	120.3	F:GO:0003878; F:GO:0005524; C:GO:0005737; P:GO:0006085; P:GO:0006101; P:GO:0006629; F:GO:0046872; F:GO:0048037	F:ATP citrate synthase activity; F:ATP binding; C:cytoplasm; P:acetyl-CoA biosynthetic process; P:citrate metabolic process; P:lipid metabolic process; F:metal ion binding; F:cofactor binding	EC:2.3.3.8	ATP citrate synthase	MSAKAIREATGKDLLNRFLNSGKSAVKCQFAAVNEDTEWESLVVNNLWLKSERLVVKPDQLIKRRGKLGLIHVNSDLDGVRKWVDERRGKDVQVGRATGKLRNFIIEPFVPHKQDEEAYVCVYSHRHGDTILFHHEGGVEIGDVDAKALKLEIPIEGKPSLDDIKSKLLKHLSAEQQMFVAKFIQDLYEVYVYLFFTYLEINPLVITGDKIFVLDLAAKLDATAEFMCKQKWGDIEFPPPFGRDAFPEEAYIADLDSKSGASLKLTIINKDGRIWTMVAGGGASVIYSDTVCELGGASELANYGEYSGAPSEQQTYEYAKTILSLMTKKAHPEGKVLIIGGGIANFTNVAATFKGIVKALQEFQPRLVEHNVSIFVRRAGPNYQEGLRVMREVGSTLGV…	0	3	3 (3)	4		0	1	1 (1)	2	124237
Tt_012406-T1		60 kDa heat shock mitochondrial-like	490	53.1	F:GO:0005524; C:GO:0005829; P:GO:0006458; P:GO:0008637; P:GO:0042026; P:GO:0045041; F:GO:0051082	F:ATP binding; C:cytosol; P:'de novo' protein folding; P:apoptotic mitochondrial changes; P:protein refolding; P:protein import into mitochondrial intermembrane space; F:unfolded protein binding			MYRLPTILRSSAARHISPTLRRGFAKDIKFGADVRALMLQGVDVLADAVAVTMGPKGRNVILEQSWGGPKITKDGVTVAKAIELKDKFHNIGAKLVQDVANNTNEEAGDGTTTATILARSIAKEGFEKISKGANPIEIRKGVMTAVENVVEHLKKLSKNVTTPEEIAQVATISANGDKQIGELISSAMKKVGKDGVITVKDGKTLHDELEVIEGMKFDRGYISPYFINTSKGAKVEFQDALVLFSEKKISNIQSIIPALELANAQRRPLVIIAEDVDGEALSTLVLNRLKVGLQVVAVKAPGFGDNRKNTMHDMAVATGGLVFGDDANLIKMEEVQLSDLGEVGEVTITKDDTLLLKGKGKKEDIDRRIDQIKDEIDMTNSDYEKEKLSERLARLASGV…	0	39	15 (15)	70	2.62068e+07	0	66	24 (24)	57	3.76399e+07
Tt_012432-T1		polypeptide N-acetylgalactosaminyltransferase 9	217	24.6					MNLFPRRRSVVIKILVLIIITWFLVTVLLAYNEKVNTGKDVETRNIPNNNVIRDSTNKFKEANHQGDSIANQPLPPQPPGVRHKYHKDSVAVDVPGDQGHGVLPPPRDPEGPGEMGKPVKLSNLTQNQQAMVKQGWEKNAFNQYISDLLSLHRSLPDVRDKECRDVKYMNNLPQTSVIVCFHNEAWSVLLRTVHSILDRSPSELIKEVILVDDFSDQ	0	7	1 (1)	2	367267	0	7	1 (1)	1	703422
Tt_012434-T1		polypeptide N-acetylgalactosaminyltransferase 9 isoform X1	398	45.9					HLHRQLEDYVAHLPKVRVVRAHRREGLIRARLLGASVATAPVLVYLDSHCECTEGWLEPLLDRIAQNSTTVVCPVIDVINDDTFEYHFRDSSGLNVGGFDWNLQFNWHGIPEREKKRRKHPWDPVWSPTMAGGLFAIDKKFFEKLGTYDSGFDIWGGENLELSFKTWMCHGTLEIVPCSHVGHIFRKRSPYKWRSGVNVLKRNTVRLAEVWLDDYAKYYYQRIGYDLGDFGDISSRKELRKQLKCKSFDWYIKNVYPELFVPGDAVASGEIRNLGEGSSTCLDSPARRDDLHKPVGLYPCHRQGGNQYWMLSKQGEIRRDEACLDYAGQDVILYPCHGSMGNQLWMYDPNNHSIQHGSSRKCLEMAPDKQHVLMKECTESSLQQWKFQNYNPSNAGKA	0.002	5	1 (1)	1		0.005	4	1 (1)	1	234528
Tt_012447-T1	Arp1	clone 403-like	376	41.8					MCDDDIAALVVDNGSGMCKAGFAGDDAPRAVFPSIVGRPRHQGVMVGMGQKDSYVGDEAQSKRGILTLKYPIEHGIVTNWDDMEKIWHHTFYNELRVAPEEHPVLLTEAPLNPKANREKMTQIMFETFNTPAMYVAIQAVLSLYASGRTTGIVMDSGDGVSHTVPIYEGYALPHAILRLDLAGRDLTDYLMKILTERGYSFTTTAEREIVRDIKEKLCYVALDFEQEMGTAASSSSLEKSYELPDGQVITIGNERFRCPEAMFQPSFLGMESCGIHETTFNSIMKCDVDIRKDLYANTVLSGGTTMFPGIADRMQKEITALAPSTMKIKIIAPPERKYSVWIGGSILASLSTFQQMWISKQEYDESGPSIVHRKCF	0	51	22 (3)	278	4.78446e+06	0	74	28 (4)	645	5.4663e+07
Tt_012477-T1		carbonyl reductase [NADPH] 1-like	288	32					MTTMYGAIFRPMEATMKKSYGGFCARSYSRLEFWQNVMKEKEIIMARKVAVVTGGNKGIGYAIVKELCCKFNGDVILAARDEARGKNAVEQLKALNLNPVYHQLDIDNTTSVAHLKDFLLKEYGGLDILVNNAAIAYKMASTASDAEQAENTIRTNFFGTLNVCKALFPLLRPHARVVNVSSSAGRLSNIPNKELQKKFLAPDFTEEELCRLMKEFVSDTKAGLKREKGWAPTNYQMSKVGVTALTILQQKEFDKDSREDLVVNAVHPGYVNTDMSSGKGVRSIEEGN	0	55	11 (11)	46	1.68531e+07	0	50	11 (11)	18	2.00714e+07
Tt_012850-T1		T-complex 1 subunit alpha-like	548	58.9	F:GO:0005524; C:GO:0005737; P:GO:0006457; F:GO:0051082	F:ATP binding; C:cytoplasm; P:protein folding; F:unfolded protein binding			MSVVGSVLSVGGTRTSGESVRTQNVMASCSISNIVKSSLGPVGLDKMLVDDVGDVTITNDGATILKLLEVEHPAAKVLVELAQLQDEEVGDGTTSVVIVAAELLKNADELVKCKIHPTSIISGYRLACKEACKYIQENLTINVDELGRDCIVNAAKTSLSSKLIGSDSDFFANMVVDAAMAIRTSDGKGGFKYPIKAVNVLKAHGRSTKESILVHGYALNCTVASQAMPKKIVGAKVACLDFGLQKAKLHLGVQVLVTDPNKLEAVRKRESDITKERIQKILAAGANVILTSGGIDDLCLKYFVEAGAMAVRRVKKIDLKRIAKATGAQLLQSLANMEGEEGFDATMVGDAEEVVQERICDDELLLLKGPKAHTASSIILRGANDFFVDEMERSIHDSL…	0	4	2 (2)	3	346615	0	2	1 (1)	1	246477
Tt_012857-T1		elongation factor 1-alpha-like	461	50.7	F:GO:0003746; F:GO:0003924; F:GO:0005525; P:GO:0006414	F:translation elongation factor activity; F:GTPase activity; F:GTP binding; P:translational elongation	EC:3.6.1.15	Nucleoside-triphosphate phosphatase	MGKEKIHINIVVIGHVDSGKSTTTGHLIYKCGGIDKRTIEKFEKEAAELGKGSFKYAWVLDKLKAERERGITIDITLWKFETPKYYITVIDAPGHRDFIKNMITGTSQADCAVLIVAAGTGEFEAGISKNGQTREHALLAYTLGVKQMIVGVNKMDTTEPPYSEKRFQEIEKEVSAYIKKIGYNPAAVSFLPISGWNGDNMLEPSTNTPWFKGFKIERKSQVMEGKTLLSALDCIEPPSRPTDKNLRLPLQDVYKIGGIGTVPVGRVETGILKPGMLVTFAPAMITTEVKSVEMHHESLTEALPGDNVGFNVKNVSVKELRRGYVAGDSKNDPPQATSDFTAQVIILNHPGQISNGYAPVLDCHTAHIACRFKEIKEKCDRRTGKKLEDNPKFIKSGDA…	0	38	18 (3)	120	3.31528e+06	0	26	12 (1)	65	1.45889e+06
Tt_012881-T1		tumor D52-like	206	23.2					MATTPGEEVKATYPALSENYYDASEETKGYVSTPDSGIHDLSSMDPELRAKMEEEWKEELAKTEEEIITLRQVLASKVRYAQDLKHKLGITVWKEFKDDMQQGLKNIQETEVYQRTTQTLKTAGEKTTNVLGNLGANVSKKLEDVKNSQTFRSFEERVGTAYETVKKNIPGSHSTSTNNFEEALKNAEKPRSEGVTPTTPEEKPLS	0	53	8 (5)	31	4.9823e+06	0	41	6 (4)	14	8.22784e+06
Tt_012988-T1		RNA-binding squid-like isoform X1	331	36.5					MENDNQYNGQNQDYSYSEYNDSQYGHYQQEGMDTDGGMQSGGGDNSLVETGKGKTDDDRKLFVGGISWDTQTHDLKNYFSKYGEVTDVNIKTDPNTGKSRGFAFVTFALQESVEAVFKDATHSVKGKQIDPKRAKARPGIKKIFVGGLDPEMSESDIRAYFEQYGKVEAIELPVDKVKNQRRQFAFITFESEESVKEITKQPKQMIGNKECDVKKATSKPDPRSMRGGFMGGWGAPRGGAGRGRGRGGYQTQEWGGDQGYGGYNQSYSSYNPGYGNYDYSSYGADYTGGYGGYDYSGWGYGQGYGQQASGYGKTRGAGRGGTATTFYHPYR	0	12	3 (1)	10		0	6	2 (1)	3	99595.9
Tt_013016-T1	SdhA	succinate dehydrogenase	540	59.2	C:GO:0005743; P:GO:0006099; F:GO:0008177; P:GO:0022900; F:GO:0050660	C:mitochondrial inner membrane; P:tricarboxylic acid cycle; F:succinate dehydrogenase (ubiquinone) activity; P:electron transport chain; F:flavin adenine dinucleotide binding	EC:1.3.5.1	Succinate dehydrogenase (quinone)	MFLVEEIWSAAEELADLDVAGGDGGGSLENYGMPFSRTQDGKIYQRAFGGQSYNYGKGGQAHRCCCVADRTGHSLLHTLYGQSLRYNCNFFVEYFALDLLMEGGECRGVIALCLEDGSLHRIRAKNTVLATGGYGRAYFSCTSAHTCTGDGTAMVTRAGLVNQDLEFVQFHPTGIYGAGCLITEGSRGEGGFLVNSDGERFMERYAPVAKDLASRDVVSRAMTIEIREGRGVGPEKDHVYLQLHHLPPEQLASRLPGISETAMIFAGVDITREPIPVLPTVHYNMGGVPTNYKGQALTYSPGEGDKIVPGLYACGEAGCASVHGANRLGANSLLDLVVFGRACAFSISEENKPGDPIGEIKPNAGEESVSNLDKLRYANGSISTSELRAKMQKTMQTHA…	0	11	5 (5)	17	4.80603e+06	0	14	6 (6)	7	3.85779e+06
Tt_013017-T1	SDHA	succinate dehydrogenase [ubiquinone] flavo mitochondrial-like	110	12	C:GO:0005743; P:GO:0006099; F:GO:0008177; P:GO:0022900; F:GO:0050660	C:mitochondrial inner membrane; P:tricarboxylic acid cycle; F:succinate dehydrogenase (ubiquinone) activity; P:electron transport chain; F:flavin adenine dinucleotide binding	EC:1.3.5.1	Succinate dehydrogenase (quinone)	MAGLRSAPVFFLRSLSYCYGGLRWKRGNPLVAFRNFHFTVEGRQTDAKTKSGEFGRDYPVVDHTYDAVVVGAGGAGLRAAFGLVQEGFKTACVSKLFPTRSHTVAAQVCY	0	30	2 (2)	4		0	30	2 (2)	3	929384
Tt_013090-T1	RpL7	60S ribosomal L7	245	28.8	P:GO:0000463; F:GO:0003735; C:GO:0022625	P:maturation of LSU-rRNA from tricistronic rRNA transcript (SSU-rRNA, 5.8S rRNA, LSU-rRNA); F:structural constituent of ribosome; C:cytosolic large ribosomal subunit			MAKEAKKVPQVPESLLKKQKKRLELKAKALDNAIKQKKIRRAKRKEIFQRAMKYAKEYKSMERSVIHLKRMAKKQGNFYVPAEAKLAFVIRIRGINGVSPKPRKILQLFRLRQINNGVFVKLNKATINMLRIIEPYIAWGYPNLKSVRELCYKRGFGRIDRRRIPITENSIIEKCLGKYGIMCMEDLIHEIYTIGPNFKKATNFLWHFKLNTPLGGWRKKTTHFVEGGDFGNREDQINPLLRRMI	0	26	6 (6)	14	2.3915e+06	0	27	5 (5)	8	5.95436e+06
Tt_013592-T1	FIBCD1	techylectin-5B-like	300	34.8					MSFCVSSKLILYCLVFTLLTLNKCKVDGSDQKRYCERLGSMEGILHSLSLTTSQLVDLATTSIQELRDVESCTRNCRSTLPQDCSNLLNSEHQKSGIYEVWPRFLNESVHVWCDMHQDGGGWTVIQRRGDYGNDPLLFYKSWNDYKQGFGNISEDFWLGNDKIFALTSQNTMELFIYLENFEGEKRYALYSNFLVRSEREQYQMSYENYEGNAGDAMAVHNHRNFSTFDRDNDLKNSSPSCAEKYRAGWWFDVCHKANLNGPYERGLHEPTGRGINWEPWTGLHYSLKAVEMKVRPKKLK	0	30	7 (7)	41	5.56286e+07	0	63	14 (14)	41	7.4198e+07
Tt_013678-T1		tumor D54-like isoform X1	177	19.6					MDPNQKVLLEQELAKTEEEITTLRHVLAAKIRKAQELKQMLGISVWKEFKDDVGQSIKNIQEMPVYKGISSKLSEWNTAITRAPIYQRTTNTLKTAGEKSTVALGNFGANMTRKLGELKNSQTFRSFEEKVGSAYDNVKTKLSGSHSSSTHSFIETARSSGTTPATSPVIPEEKPLL	0	33	4 (4)	12	1.25432e+06	0	10	1 (1)	2	318185
Tt_013693-T1	XRCC5	X-ray repair cross-complementing 5	723	81.4	F:GO:0003677; C:GO:0005634; P:GO:0006281; F:GO:0016817; P:GO:0051276; P:GO:0071479	F:DNA binding; C:nucleus; P:DNA repair; F:hydrolase activity, acting on acid anhydrides; P:chromosome organization; P:cellular response to ionizing radiation			MAANKEAVVILLDVGPGMNDGEEDGPTSLQQAKACIGMVLQRRIFSESKDEFALVLLGTEETANNLADTESGEYCHITVAQNLKQADWKLLQFVQDIEVSMVSADFVDGIIIGMDVLMHQTQGQKFAGQRLLLFSNFSSEYSPDQVDVIINGIKKTGMEVNVIGPTSIGHGNKEDEVGHEDRNHLRNQKPKTAQQLSGEALLQRILDETNGEAYSFSEALPALTNYQKKNVQSAGWNSPLEIARNLRIPITGYIKASEFKLKPWKTACAQRPEVKVLRETTYHMNDEVQTEVLKQDTVLAYRYGTTLVPFSEEDKVNMEYKTGDKGLKVLGFTKQDYVRQHWFLGDKTMYIVGKKDHESAQVVLSAFIRALYETNMVAVVRYAYSARSSPRIGFLSPRI…	0	4	2 (2)	4	410784	0	6	3 (3)	3	912391
Tt_013934-T1		tetratricopeptide repeat 28-like	934	105.3					MEFLKEDENAEVLQKVTKLMQSFENQVESLKSKVDIVDVTEKIKSKSGTSDETVILKNLHNTNLPALAIILDKLLEEKDGLSVQKRMEYLGLRQHVAMSLETFTKARSLGEVMHQLAKDLHQSTTTCYLDAQVALTTAYNSLFQACICCFLVCRYQGDVEHAKKYLDEAKSVAEKANNDDDYQMALIYHADWLLAKGNLNSAINEFLEPLLHKKNLTMQNKGLLLQKLGNACRSAAQWGLAKQHLRESIRIAQSLGDKVAEYDRATDLGNVYRSEGRISDAIKHQSRHMTFAFQRGDLWGLSVACFNMGFAYFSISPKPDLERAMVFLVVKNILASRTHNEPLRGIALSNLGKVFCALGQYETAIKALEEGVSVAKKTGNIAGEGMAYGNIGTAFRHLG…	0	5	4 (4)	11	1.10852e+06	0	13	8 (8)	11	1.09782e+06
Tt_014520-T1	RpL38	60S ribosomal L38	70	8.2	F:GO:0003735; C:GO:0005840; P:GO:0006412	F:structural constituent of ribosome; C:ribosome; P:translation			MPKQIMEIKDFLLTARRKDAKSVKIKKNRDNVKFKVRCSRYLYTLVVNDPEKAEKLKQSLPPGLQVKELK	0	49	5 (5)	20	5.01267e+06	0	21	1 (1)	1	1.39827e+06
Tt_014556-T1	Tha1	probable low-specificity L-threonine aldolase 2	371	40.2	F:GO:0003824	F:catalytic activity			MEGVNLIDVRSDTVTKLTPEMRKAMFEAEVGDDVFREDPTVLELERQGAALFGKEAALFVPTGTMGNLVSIMAHCVGRSQEILVGDESHINIYEQGGTAQFAGVHTRTLTTYPDGTFDIDELVRKIRPNDDIHQPTTALICLENTHNRCGGAVLPVEFIKKVSQIAQKYNIPIHMDGARIMNAAINLGLPVASILEDCASVSACLSKGLGAPAGTLVAGSSQFISRVLRCRKALGGGMRQVGVLAATGLVAINTMVSRLADDHKHAQLVAKAINDRKSEYISVDKDKVQTNIVLINVNPKVISPEKFAQRLKQFDEKEVEKLGESVSVIMSPRSASSLRCVLHADISAAKMELLIKKLNYVLDEIETETKG	0	3	1 (1)	2	57472.2	0	3	1 (1)	1	300273
Tt_014580-T1		40S ribosomal S9	192	22.7	F:GO:0003735; F:GO:0019843; C:GO:0022627; P:GO:0045903	F:structural constituent of ribosome; F:rRNA binding; C:cytosolic small ribosomal subunit; P:positive regulation of translational fidelity			MPRIPTVHRKTYVTPRRPFEKERLDQELKLIGEYGLRNKREVWRVKFTLAKIRKAARELLTLEEKDPRRLFEGNALLRRLVRIGVLDENRMKLDYVLGLRVEDFLERRLQTQVFKHGLAKSIHHARVLIRQRHIRVRKQVVNIPSFIVRLDSEKHIDFSLKSPFGGGRPGRVKRKNSRKPQGGVGGEEEDED	0	53	14 (14)	56	1.75773e+07	0	30	6 (6)	9	1.5905e+07
Tt_014619-T1		techylectin-5A-like isoform X1	186	21.4					MLRLEINQMMISIQPVMILLLVHQSCQIETNFERCQLTSVSTVLDSVSLLITQAKQKIHNDDLECSRNSPGPTDCADIFLNGHRTSGVYRIWPKSWMLAGSFDVFCDMDTDGGGWTVIQKRGDYGNPTDYFYKSWQEYKMGFGNIEKDFWLGNYWIFSLTNQGTYSIRFDLRDKEGDDLPSIGSLR	0	9	1 (1)	5	1.60738e+06	0	40	7 (4)	24	1.93022e+07
Tt_014771-T1		thioredoxin 1	285	31.6	C:GO:0005623; P:GO:0045454	C:cell; P:cell redox homeostasis			MPVTVIHEDARFQIELSTAGNKLVVVDFTASWCGPCQRIAPVFEELSNKYTLAIFLKVDVDQCPDTAASQGVTAMPTFIFFRSKVKLAQIQGADPQALENKIKELVGSETDDSEGVVPGHVDLFSFIAKSSCECLNESDENTLTECLSPGDGFLESDVDEQLIMSFGFNQTVKLHSLKIQAPKDSGPKNIKLFINHPRTLDFDQADSMEPVQAIEIQPKDLDDGIIIPLRYVKFQHVQNLQIFVKDNQEGTERTRIDHLTIYGSPICTTNMGEFKRVAGKKGESH	0.009	2	1 (1)	1		0	4	1 (1)	1	273198
Tt_014791-T1		LIM and SH3 domain -like isoform X3	226	25.5	F:GO:0046872	F:metal ion binding			MSAKRCARCEKIVYPLEELKCLDKIWHKGCFKCQECGMTLNMKTYKGFNKLPYCNAHCPQAKHTTVADTPETRRLAENTKIQSNVKYHEEFEKQKGKFTQVADDPETLRIRSTHKIISNVAYHGELMKKEKMEQKRQLLPEKNGAPTSIAGKAPVERSQKFQPMQSSPTRKIGSIADYDPLSDSYGSIASGVRSNTSTSQVYRGAPPPSQHFQGVSCVISLVSYKI	0	35	9 (4)	23	4.65541e+06	0	15	3 (1)	5	1.69439e+06
Tt_014807-T1	sn	singed isoform X1	433	48.8	C:GO:0005737; C:GO:0005856; P:GO:0007015; P:GO:0016477; F:GO:0030674; F:GO:0051015	C:cytoplasm; C:cytoskeleton; P:actin filament organization; P:cell migration; F:protein binding, bridging; F:actin filament binding			MSNSINGVEGMDQALKWNIGLLNSQFKYLTAETFGCKVNANGTALKKKQMWTLEPYGGDDDSVCLRSHLDKYMAVDQFGNVTCDADEKEPSCKFNIVVADDKSGRWTLKNVLRGYFLGASTDKLVCSAKVPSPSEMWTVHLAARPQILLRSQGRRRYARLSTDMDEIQVDANTPWGEDTLFTLEFHDGKYAIHTSNSRYLQADGKLVEDCRPECLFTLEFHNGYLALRDSNNAYVAPIGSKAVLRTRSQTVTKDELFSLEESAPQAAFVGFNGRYVSVKQGVDVTVNQDEISDHETFQLEFDKATKRWYIRTMQDKYWTLESSGGIQANALKGSSNSLFDMVWQEDGSVTFVANNGKYVAAKKSGHLFANSDKVEDMEKFYFFLINRRSLVLKCEQGFV…	0	12	4 (3)	6	1.48157e+06	0	23	9 (4)	17	5.2646e+06
Tt_015000-T1	rps15a	40S ribosomal S15a	130	14.8	F:GO:0003735; C:GO:0005840; P:GO:0006412	F:structural constituent of ribosome; C:ribosome; P:translation			MVRMNVLADALKSVNNAEKRGKRQVLLRPCSKVIVRFLTVMMKHGYIGEFEIVDDHRAGKIVVNLTGRLNKCGVISPRFDVHLRDLEKWTSNLLPSRQFGFLVLTTSGGIMDHEEARRKHLGGKILGFFF	0	35	5 (5)	15	1.9032e+06	0	18	3 (3)	7	2.38106e+06
Tt_015143-T1	CLIPD1	secreted salivary gland	573	64.4	F:GO:0004252; C:GO:0005615; P:GO:0006508	F:serine-type endopeptidase activity; C:extracellular space; P:proteolysis	EC:3.4.21	Acting on peptide bonds (peptidases)	MKACYLVLLLLLPYSVTGGDGDEQFRVKRQGLSDVLGQFAKPKQNDKVSETATELPDYDYSEYRNDYEEETSDSTNKTLQDVVQQLIKVARGVYPIPSGRSALINLNAHPSERFQFCRTPKNEPGHCRYIQHCLLPEFVTDFSKFVSYVCFINSRYVGACCPDDHPAENIPAALTTTTTTIPEVHPPIQDQQDKPFRPHRPERPNRRPGRPNRRPGKPFQPGRPNRPGRPFQPGRPNRPGRPFQPGRPNRPGRPFRPGRPNRPGRPFRPGRPNRPGRPFRPNGTERPYEPEEPEPTPEPTLPPTTTPKPTQPPPPPSPEPSNSPYEEVCGLSFRTRIVGGKEADPGDWLWMAALIRGPADLTGQFCGGALINRYYVLTAAHCTEGFTANTIKVRLGEYD…	0	4	2 (2)	7	1.29506e+06	0	9	5 (4)	15	3.38301e+06
Tt_015512-T1	Mhc2	myosin heavy non-muscle-like isoform X1	1977	228.7	F:GO:0003774; F:GO:0005524; C:GO:0016459; F:GO:0051015	F:motor activity; F:ATP binding; C:myosin complex; F:actin filament binding	EC:3.6.1.15	Nucleoside-triphosphate phosphatase	MAEPVSVDFRKDPELKYLVVDRNVGINDPTIQAEWTSKKLIWIPHEQQGFVSASIKVDRGDELEVEIVETSKRCVVNKDDAQKMNPPKFSKVEDMAELTCLNEASVLHNLKDRYYSGLIYTYSGLFCVVVNPYKKLPIYTEKVIDLYKGKKRHEVPPHIFAVTDGAYRSMLQDREDQSILCTGESGAGKTENTKKVIQYLAYVASSKPRSTTAALHTGELEQQLLQANPILEAFGNAKTVKNDNSSRFGKFIRINFDASGFIAGANIETYLLEKSRAIRQAKDERTFHVFYQLLNGASPEQKKEYLLEDVKNYTFLRNGNVQVPGIVENQEFKNTVKAMDIMGLTQDDLSAIFRVISSVMLFGNMKFKQERNSDQAALPDNTVAQKISHLLGLNVTEMT…	0	34	62 (59)	309	9.84318e+07	0	43	75 (68)	255	1.0082e+08
Tt_015673-T1	CARHSP1	cold shock domain-containing CG9705-like	154	17.3	F:GO:0003676	F:nucleic acid binding			MSKPLDIPHQIRPEKGLELPSSPSRTSFGSPGKHYQIPSPIITRRTRTFSLSEQAAANPVQHGTVKYFCRQKGHGFIRPDDESEDIFFHISDIEGEYAPRRDDEVTYKLCLIPPKKEKVQATHVIITSLGPGTHERWDQPPSPVPKEAASGTRI	0	25	3 (3)	7	1.85985e+06	0	12	1 (1)	1	1.73347e+06
Tt_015801-T1		THO complex subunit 4-like	242	25.7	F:GO:0003676	F:nucleic acid binding			MADKIDMSLDDIIKQDRSKFRVRGAGRGGGRGSRGRGTRPSSGGIGRWSTGRGGPIRNRQTRGRSKPLPYSRPKQLPDKWQHDLFDGGVGGGARVLTTGPSKLLVSNLDFGVSDADIKELFAEFGPLRKAAVHYDRSGRSLGTADVVFERRADAIKAMKQYNGVPLDGRPMNIQIVTSLTQGGNAGKIGSGIGGGGGGRGGGRGRFMRSRGRGRGRGGGQNRKVPTAEELDAELDAYVNKMD	0	47	8 (8)	26	9.76759e+06	0	5	1 (1)	2	2.14008e+06
Tt_015954-T1	PyK	pyruvate kinase PKM-like	527	57.4	F:GO:0000287; F:GO:0004743; P:GO:0006096; F:GO:0016301; F:GO:0030955	F:magnesium ion binding; F:pyruvate kinase activity; P:glycolytic process; F:kinase activity; F:potassium ion binding	EC:2.7.1.40	Pyruvate kinase	MAVTQSPRALGHQLHAANEESRFDHLSALDIDSHPTFTRLTGIICTIGPSSREVKMLVEMMKAGMNIARMNFSHGTHEYHLGTIQNVREAVKIVSQEINMPHSVAIALDTKGPEIRTGLLEGGPTAEIELVKNDTIKVTTDDSMKEKCSKDVLYVDYKNITKVVVPGNKVFVDDGLISLVVKEIGADFLHCEIENGGLLGSKKGVNLPGVIVDLPAVSEKDKEDILFGVEQGVDMIFASFIRNGAGVKEIRNILGEKGKDIKIIPKIENHEGVKKIDEIIEECDGIMVARGDLGIEIPPEKVFLAQKMMISKCNILGKPVICATQMLESMVKKPRPTRAESSDVANAVLDGADCVMLSGETAKGDYPLQAVKIMDAICTEAEAAIFHKHVFTELSTKTP…	0	14	6 (1)	17	434630	0	58	25 (13)	109	2.97643e+07
Tt_016048-T1	JHBP	uncharacterized protein LOC106468221 isoform X2	244	27.5					MKLLFVFLTSAFICGSSNSQLIGLGEQGLNNYLRLVVDNFRNVMKVGSSKPRIPILDPLLIRDQHIKKIEDNTNITAEFRNIVIFGLSSYELDTFEVNFDDLILKLGLSIPLLDAKGKYNLEGIIINIFPLTGNGDVRVMAHNVKISGKVEFMLTPEGYLKVSTLKLDLDFSSVSVNFQNLLGSQSVSNFVNKLLSLLGRPIFQSFKRDILDDLEKNMRKSMDKELKKHKLYEILQGSIDPRDG	0	18	7 (7)	37	3.68438e+07	0	41	13 (13)	85	2.41854e+08
Tt_016498-T2		gelsolin, cytoplasmic-like, partial	749	85.2	F:GO:0051015	F:actin filament binding			MTVPEEPAFEGVGQEPGLLIWRIENFEVKPLESQEYGTFYSGDSYILLHTKKTRTGKLEWNIHFWLGKDTSQDEKGTAAIKAVALDNALGGAPVQHREVQSHESQMFLSYFKKKGVRYLEGGVASGFRHVEDEVMKCMMQVKGRHNVRAFQVDLNVDSMNKGDCFILDAGPNIYIWVGPGSRHMERIKAIQVANGIRDDIHAGRGQISIIDEHSNPRDHEKFFEDLGSEFPVDIKDAEEVAEDTEHERAVEREITLHKIWEEDGEVNIEKIAERPLKQEHLDPGNCFMLDGGVSGLFVWVGKEASPKEREESMKMAEKYLETRGYPSWTSVTRIIDGGEPPMFKQYFSSWHEPEDQVGLGRVYKAEEIAATVDEEFDINSLHREKRRLLAKSLGKACGF…	0	17	10 (10)	26	6.85674e+06	0	26	14 (14)	19	1.84198e+07
Tt_016726-T1		histone H2A-like	138	14.7	C:GO:0000786; C:GO:0000790; F:GO:0003677; P:GO:0006325; F:GO:0046982	C:nucleosome; C:nuclear chromatin; F:DNA binding; P:chromatin organization; F:protein heterodimerization activity			MSGRGKGGKVKGKSKSRSNRAGLQFPVGRIHRLLRKGNYAERVGAGAPVYLAAVLEYLAAEVLELAGNAARDNKKTRIIPRHLQLAIRNDEELNKLLSGVTIAQGGVLPNIQAVLLPKKTGQPTSSGKPKKGGASQEF	0	73	12 (4)	213	1.29354e+09	0	62	9 (2)	74	9.09242e+08
Tt_017350-T1	scf	calumenin-like	327	38.3	F:GO:0005509; C:GO:0005783	F:calcium ion binding; C:endoplasmic reticulum			MDLLLNQSFLFIVILLMAIGLAVPNPDNEKKRVVNKPLSDEQHYGDDAEHNVDYDHEAFLGEDEARTFENLTPEESKKRLGEIVDKIDKDNDGFVTQKELQDWIQFTQKRYILDDVDRQWKSHNPNKKEVLTWEDYRKVTYGLTDDLENADESNSDDLSYKDMIARDKRRWEVADTDDDDALNEKEFANFLHPEEAKHMQDVVIQETLEDIDKDKDGKVSLEEYIGDTYGGAGKNEDEPDWVRSERDQFMNFRDKDKDGFMDKEEVKEWILPPDYDHSEAEARHLIFESDSNKDQKLTKDEILGNYDLFVGSQATDFGESLMRHDEF	0	20	4 (4)	7	1.10073e+06	0	66	16 (15)	36	1.30483e+07
Tt_017432-T1		Arf-GAP with dual PH domain-containing 1	442	51	F:GO:0005096; C:GO:0005886; P:GO:0043547; F:GO:0046872; F:GO:1902936	F:GTPase activator activity; C:plasma membrane; P:positive regulation of GTPase activity; F:metal ion binding; F:phosphatidylinositol bisphosphate binding			MPSKKRTILQTLCCCCPSFISKSETKELLPSGVVTRRKQIFFVIPKTKIVSKDSNQKMADANGRRLFELLKRPGNNTCVDCRAPDPEWASYNLGIFLCTQCADIHRSMGPHISKVKSIRNVHWDTSQVDMMENGGNQRAHVKYEKHVPVCYRRPLAHDVQVLKEEWIRAKYEREEFIHIDKQVYLSGQMEGILWKRGKDDGRFNPRKFLLNEADDILKYYVKEQQKEPKAVIRISQLNATLCPTKIGNPNGMQLTFVDEGSTRNIFVFSREGKDIIHWYTAIRSAKLNRLQVAFPGTSELELARYLTRDFLKEGWLRKMGPRSGDSYKLRWCTLDDRKLMYLENPLDPYPKGEIFLGYHAEGYGIKPSVPEGVKQYGFGFTLQTPERLFIFGSDKDEDR…	0	7	2 (2)	4		0	15	5 (5)	5	2.75237e+06
Tt_017809-T1		muscle LIM 1-like	106	11.6					MPFKPVQQPKCPKCSKSVYAAEEILAAGQKWHKNCFKCGLCQKRLDSTNASEHDSQIFCKQCYGRKFGPKGYGFGQGAGTLNMDTGVHLGNTETLMSNKPTDPNYG	0	13	1 (1)	6	1.41648e+06	0	13	1 (1)	2	2551221
Tt_017866-T1		uncharacterized protein LOC106472008	344	40.4					MDSTCKMVFVVCLMLFTVGLMTAESKSNAALFRRSIERTNNNDEIIARLINKLHYLGYKLEEFTTFQQKVRKLEEMNNFHSQKISEMLNHISELTSSLAKEKERRDKERTKGEEDAKLSSDYINMNESTHEKQEENLTPSLHNLAGEIRERLLHFEESLKTMKENIKSLKENSSSNFTKMFKDVAKSRRVTNDIYLRLDTAENLQADIRHDLRLVSEKVNLQERKFSTIKTNLKKDLEEIHGNITEELSYAKTRMNLLNDNLSSVSNKTGILQDQYNEFREEFYQYRNYVENNVMEVQTTTSPPHSNNEKITLESIRKAFEKYGVNPVSNKTMNYRDSKEKERQ	0	16	4 (4)	7	613044	0	3	1 (1)	1
Tt_018340-T1	LanB1	laminin subunit beta-1-like	1795	199.4					MAADREQLRRGGLVYFLVCSAVLVAFIPESSSRRQRGHVDRRFQGRYNADEFYSQGPHACDESSCYPATGNLLIGRADKIKASSTCGLNHVERYCIVSHLKEKKKCFYCDSRPSRKNEPRLYHGIENIVSRIGRKWTEWWQAENGVENVTLQLDLEAEFHFTHLIITFKTFRPAAMLIERSHDFGQSWEVYQYFAYDCHESFPGIPTQPRQRITDVICDSYYSRVEPSTGGEVIFRVLPPHIRVHDPYSPEVQNLLKMTNLRINFTKLHTLGDNLLDSREEIKEKYYYAIYDMVVRGSCSCYGHASRCIEEGEQISRPDMVFGKCECTHNTKGRNCEQCDDFYNDLPWRPAVGLETNACKECNCNRHATRCHFDPAVWEVTGRVSGGVCDDCEHNTMGR…	0	8	13 (10)	45	1.99935e+07	0	18	27 (20)	78	5.52655e+07
Tt_018460-T1		uncharacterized protein LOC111088281	470	53.8					MEFLPVLLLCFMLCRPGLGNQQWEGKIENMLLSLQVNVRSLEGRMSQLNVMEYAFKINNIDSRLEAILQKVEENDNKLLALQSEVERLSQQLSSRSRDKSTPDRSDESEQNQPLVLEKVEGYSQKILRAHQTLLDILKVTNEKVTNGLNKMFEKFNSFVQLKSLENSFQRVAQNVEIVHGKINSITTTNAVTSTVVENLQVMIENGFLDLQNILRKDLDFRNTLSGIKPFIENIQKEVIQGISIGKQHSTEMWGKVIEIFNSTFFPVSNLRTIRTVFDEIKTEVDKLRNLEIKFQKANSAKNYIKDEIDKLFALNPTMHSHMGQLKHSIDTIKDEWYKLTSNLTNSMKTLDNVFPPLQNNSDRKEFCLQEAASIVKVVEDIKTGVQHLETVTGGPHQDG…	0	14	6 (6)	13	5.89662e+06	0	57	23 (23)	76	5.72889e+07
Tt_018911-T1		cinnamoyl- reductase 1-like isoform X2	460	52	F:GO:0003824; F:GO:0050662	F:catalytic activity; F:coenzyme binding			MRHDFTQSTPMGDFRHMQPVHPELRLNYFASLNNLGKKLKLTLRVVQVVLVTGATGFISSHVIKLLQEDGYKVRGTVRSLQNEEQLKPIKELCPDAPQKIELVEADLTKDEGWNEAVKDCSYVIHVASPFPNIPPASEDEVVKPAVEGTKRILQACADAGTVKRVVLTSSIAAIHGETTLEEGKVYTEDDWTNTESTTLDLYSKSKTMAEKEAWEFVKELPDEKKFELAVINPGLVCGPVLTPTLSTSNEIVKRLLERGMPLVPRVNFCCCDVRDVAQAHLKAMTTPSAEGHRHIICAETVWLKEIALILTKEFKPQGYRIPTVNAPYFAVWLNSFINKSTRLLLPRIGREFKFDNSRMKEVLEISPRDFSQTILDTAYSLIENGIVKKSKKYKQGKKE…	0	6	3 (1)	5	2.96793e+06	0	14	7 (4)	11	837709
Tt_018999-T1		proteasome subunit alpha type-1-like	372	42.2	F:GO:0004298; C:GO:0005634; C:GO:0005737; P:GO:0006511; C:GO:0019773	F:threonine-type endopeptidase activity; C:nucleus; C:cytoplasm; P:ubiquitin-dependent protein catabolic process; C:proteasome core complex, alpha-subunit complex	EC:3.4.25	Acting on peptide bonds (peptidases)	MSSAKNNEKGFIKTSVKWRRDIKHQHIRYKRKIRRRSFKNKRRRVHTQESGVTTVEPALSSHANREVVVILLLAKFLNYCEEFSRRKTMFRNQYDNDVTVWSPQGRLHQVEYAMEAVKQGSATVGLKNNTHAVLLALKRASSELSAHQKKIIPIDSHVGMSIAGLTADARILSKFMRAECLNNRYALDSPLPINRLVSILGNKMQTCTQRYDRRPYGVGLLVAGFDDHGPHIYQTCPSANYFDCKSMAIGARSQSARTYLEKHLDEFKTYNLEELVKNGLRALRECLPNEVELNTKNVSIAIVGQGMDFTIYEDDAVAPYLAAIEGEERSRHPPPSDSSTSRMDEDKEPRPSGPTPPETQPDTATEERMSVD	0	21	6 (6)	25	6.89239e+06	0	24	6 (6)	10	2.92058e+06
Tt_019105-T1	Cdc37	hsp90 co-chaperone cdc37	360	42.4	F:GO:0019901	F:protein kinase binding			MVDYSKWKAIEVSDDEDETHPNIDTASLFRWRHQARMERMAELEKEKAAFEAKKQETQIKLSEAKKKLLESQKEGAMNLEELRKVVSDLEKEEKKIKKEGEELSKKERLVPWNVDTISKDGFTKTILNKPQARSQKEMSEEDKTEHYKKYVKENESLLKKYGMLQKYDDSKRFLQEHPHLACEDTANYLVIWCINLEVEEKHQLMEHVSHQCICMQYLLELAKQLDVDPRACISSFFTRIQIADREYKDSFNDELRAFKERIKKRAQKQIEDAVREVEEEERQKRLGPGGLDPIEVLESLPEPLRKCFETQDIPMLQQVITQIPEEEARYHMKRCIDSGLWIPDAKAAEETKNASDVKPS	0	9	2 (2)	5	519429	0	8	2 (2)	3	477222
Tt_019411-T1		C-reactive -like	242	26.7	C:GO:0005576; F:GO:0046872	C:extracellular region; F:metal ion binding			MQLSSLLTRGLATVFIFSWSLSYALEEGEISSKVKFPPSTASSFPRLVMDGTLPNLHELTLCYWFKAHRLDRRLHVFSYAQNATDNEILAYVEAGNTIGLIIGGKTQLHIACPSDIEVGKWHHVCYLWSSWEGSSSLMMNGYRCYGNTTGVTKGKTVQAGGTVVLGQDQDTVGGGFVASESMEGELSELNMWNSVLNSNQILHLSNCADVSERHLYGNIIQWEKTSFMFYDGVVLSPNAICA	0.002	5	1 (1)	5	324737	0	16	3 (3)	9	4.20892e+06
Tt_019543-T2	emb	exportin-1-like	1095	125.5	F:GO:0005049; C:GO:0005634; P:GO:0006886; F:GO:0008536; P:GO:0051168	F:nuclear export signal receptor activity; C:nucleus; P:intracellular protein transport; F:Ran GTPase binding; P:nuclear export			MSFARVNGMRQPVLQFTGQVNGNMANLAEQMDQLLDFNQKLDINALDNIVNCMYTGEGGQQRMAQEILTRLKEHPDSWTRVDTILEFSKNQQTKYYALQILENVIKTRWKVLPRNQCEGIKKYIVGLVIKTSSDPDILEREKVYLNKLNMILVQILKREWPKNWPSFISDIVGASKTNESLCQNNMAILKLLSEEVFDFSSGQMTQTKAKHLKDTMCSEFSQIFQLCQFVMENSQNALLVNSTLETLLRFLNWIPLGYIFETKLISTLVYKFLNVPLFRNVTLKCLTEIAGVNASHYSEMFVLLFTQTMAQLEQMLPPATNIKEAYSNGQDEEQKFIQNLSLFLCTYLKEHGSLIEKRTELNETLLAALHYLLLISEVEEVEIFKICLEYWNSLAADLY…	0.03	1	1 (1)	1		0	1	1 (1)	2	131948
Tt_020137-T1	HAGH	hydroxyacylglutathione mitochondrial-like	120	13.5	F:GO:0004416; P:GO:0019243	F:hydroxyacylglutathione hydrolase activity; P:methylglyoxal catabolic process to D-lactate via S-lactoyl-glutathione	EC:3.1.2.6	Hydroxyacylglutathione hydrolase	MFVGGCGRFFEGSPEQMYQALVKTLGALPDNTRVYCGHEYTVKNLKFAQTVEPENTTIKEKLSWAQQKRNAQEPTIPSTIGEEKTFNPFMRVEVPAVQKHSGASDPVKTMAVIRKEKDNF	0.002	13	1 (1)	2	220596	0	13	1 (1)	1	265320
Tt_020276-T1		ubiquitin-conjugating enzyme E2-22 kDa-like isoform X1	199	22.4					MANIAVQRIKREFKEVVRSEEVAKCAIKVELVNDNYTELKGEISGPPDTPYEGGNFILEIKVPETYPFNPPKVKFMTKIWHPNISSVTGAICLDILKDQWAAAMTLRTVLLSLQALLSAAEPDDPQDAVVARQFKENPDIFWLTAKHWSHAYAGAPKSYPELDAKIKRLVDIGVDEHRARVALSSYNWDLEKATESIFS	0	17	3 (3)	4	413147	0	11	2 (2)	3	634723
Tt_020368-T1		histone H1E-like	178	18.8	C:GO:0000786; F:GO:0003677; C:GO:0005634; P:GO:0006334	C:nucleosome; F:DNA binding; C:nucleus; P:nucleosome assembly			MADTPKGKASKPKKPKVAPTHPKVSVMVNTAITDLKERGGSSLQAIRKYIASHYKVDVEKLNPFIKKYLKTGVTNGTLTQTKGKGATGSFKVSTAGMKIKEKPVSKPPKKKAAAQKPVKPTKPAAQKKQKAAKKGAKKPAKPKAAKSPAKKSTAKAPKPKTPKKGKPAKKPAAKKGKK	0	54	12 (8)	77	3.02675e+07	0	43	8 (7)	31	1.69826e+07
Tt_020411-T1		histone H1E-like	170	18.3	C:GO:0000786; F:GO:0003677; C:GO:0005634; P:GO:0006334	C:nucleosome; F:DNA binding; C:nucleus; P:nucleosome assembly			MADTSKIKAGKPKKLKVVPTHPKVSVMVYTAITDLKERGGSSLQAIKKYIASHYKADVEKLNPFIKKYLKTGVTNGTLTQTKGKGASGSFKVSTAGMKITEKPVSKPPKKKAVVRKPAKPTKQAAPNKQKTAKKAAKIKSPVRKPARAPKPKTPKKAKPVKKSAAKKGKK	0	32	7 (2)	41	1.4145e+06	0	19	4 (1)	22	1.49945e+06
Tt_020421-T1		histone H2A	124	13.4	C:GO:0000786; F:GO:0003677; C:GO:0005634; F:GO:0046982	C:nucleosome; F:DNA binding; C:nucleus; F:protein heterodimerization activity			MSGRGKGGKVKAKAKSRSSRAGLQFPVGRIHRLLRKGNYAERVGAGAPVYMAAVLEYLAAEVLELAGNAARDNKKTRIIPRHLQLAIRNDEELNKLLQGVTIAQGGVLPNIQAVLLPKKTEKKS	0	69	10 (4)	258	2.5915e+08	0	66	8 (3)	80	2.42982e+08
Tt_020422-T1		histone H2B	124	13.8	C:GO:0000786; F:GO:0003677; C:GO:0005634; F:GO:0046982	C:nucleosome; F:DNA binding; C:nucleus; F:protein heterodimerization activity			MPPQPSGKAVKKAGKAQKAVRAGEKKKRKKRRKESYSIYIYKVLKQVHPDTGISSKAMSIMNSFVNDIFERIAAEASRLAHYNKRSTITSREIQTAVRLLLPGELAKHAVSEGTKAVTKYTSSK	0	65	13 (2)	627	6.09304e+06	0	57	10 (3)	166	1.17792e+07
Tt_020464-T1	Hsp83	heat shock 90	721	83.4	F:GO:0005524; C:GO:0005829; C:GO:0005886; P:GO:0006457; C:GO:0009986; C:GO:0032991; P:GO:0034605; C:GO:0048471; P:GO:0050821; F:GO:0051082; F:GO:0097718	F:ATP binding; C:cytosol; C:plasma membrane; P:protein folding; C:cell surface; C:protein-containing complex; P:cellular response to heat; C:perinuclear region of cytoplasm; P:protein stabilization; F:unfolded protein binding; F:disordered domain specific binding			MPEINMDVENNAEVETFAFQAEIAQLMSLIINTFYSNKEIFLRELISNSSDALDKIRYESLTDPSKLESCKDLYIKIIPNKEDRSLTIVDTGIGMTKADMINNLGTIAKSGTKAFMEALQAGADISMIGQFGVGFYSAYLVADKVTVTSKHNDDEQYTWESSAGGSFTISSDHGEPLGRGTKITLYLKEDQTEYIEERKIKDVVKKHSQFIGYPIKLMVQKEREKEVSDDEAEEEKEEDKKDEEETPKIEDVGEDEDEDKDKDKKKKKKIKEKYTEDEELNKTKPIWMRNPDDISQEEYGEFYKSLTNDWEDHLAVKHFSVEGQLEFKALLFVPKRAPFDLFENRKQKNNIKLYVRRVFIMDNCEDLIPEYLNFIKGVVDSEDLPLNISREMLQQNKIL…	0	17	11 (11)	42	1.34894e+07	0	24	16 (16)	30	3.36819e+07
Tt_020684-T1		charged multivesicular body 2a-like	221	25.3	P:GO:0007034	P:vacuolar transport			MPLEFLFGHRKTPEEMLRQNQRALNKAMRDLDRERTKMEQQEKKLIADIKKMAKDGQMDAVKIMAKDLVRTRRYVKKFILMRANIQAVSLKIQTLRSQNAMAQAMKGVTKAMQAMNRQLNLPQIQKVMQEFEKQSEIMDMKEEMMNDAIDDVMGDEEDEEEGEALVSQVLDELGLQLSEKLTGLPTEAGSLNVSAQKNKPSAALADADADLEARLENLRRE	0.004	4	1 (1)	1	969103	0	8	1 (1)	1	283728
Tt_020883-T1		small nuclear ribonucleo Sm D2	120	13.8	P:GO:0006397; P:GO:0008380; C:GO:0030532	P:mRNA processing; P:RNA splicing; C:small nuclear ribonucleoprotein complex			MSSLLQKPKSEMTPEELAKREDEEFNTGPMSVLTQSVKNNTQVLINCRNNKKLLGRVKAFDRHCNMVLENVKEMWTEMPKTGKGKKKAKPVNKDRYISKMFLRGDSVILVLRNPLAGQRP	0	38	4 (4)	13	2.65179e+06	0.005	8	1 (1)	2	797112
Tt_020884-T1		proteasome subunit alpha type-6	246	27.4	F:GO:0004298; C:GO:0005634; C:GO:0005737; P:GO:0010499; C:GO:0019773; P:GO:0043161	F:threonine-type endopeptidase activity; C:nucleus; C:cytoplasm; P:proteasomal ubiquitin-independent protein catabolic process; C:proteasome core complex, alpha-subunit complex; P:proteasome-mediated ubiquitin-dependent protein catabolic process	EC:3.4.25	Acting on peptide bonds (peptidases)	MARGTSAGFDRHITIFSPEGRLYQVEYAFKAINQGGLTSVGLKGRDSAVVVIQKKVPDKLLDSSTVTHLYRLTDHIGCVMTGLVADSQSQVQRARFEAANWKYKYGYEIPVDMLCKRVADISQVYTQNAEMRPLGCSMMLIAYDDEYGPQLYKADPAGYFCGYRATSVGVKQTEANSYLEKKLKKKIDYTHDEAIQLAISALSTVLSADFKSSELEIGVVSKDSPKFRKLTEQQVEAHLVALSEKD	0	24	6 (6)	13	3.05645e+06	0	22	5 (5)	10	2.00109e+06
Tt_020921-T1	beta-Spec	spectrin beta chain-	2364	275.3					MTTDIVGVRWESTTQQEFEDYDYDGGNSSSRLFERSRIKALADERESVQKKTFCKWVNSHLVRANCRITDLYLDLRDGKMLIKLLEILSGERLPRPTKGKMRIHCLENVDKALQFLREQRVHLENLGSHDIVDGSARLTLGLIWTIILRFQIQDITIEEVDNQETRSAKDALLLWCQMKTAGYPNVNIRNFTTSWRDGLAFNALIHKHRPDLIQYERLSRSNATYNLNNAFNVAEQKLGLTKLLDPEDVYVDCPDEKSIITYVVTYYHYFSKMKAETVQGRRIGKVVGEAMENDRMAHEYETLTSDLLQWIEHTIAALSDRHFANSLVGVQQQMTSFNTYRTVEKPPKFIEKGDLEVLLFTLQSKMRANNQKPYFPKEGKMISDINKAWEKLEKAEHER…	0	3	6 (6)	12	821027	0	16	29 (29)	42	2.31173e+07
Tt_021095-T1		myotrophin-like isoform X1	116	12.8					MSDFIWSLKNGDLEQIKDHVENKKVDINQAIDGRPPIHYASDYGQTEVVNYLLEKGADVNAKDKHGISALLAAIWEGHTSCVKLMLEKGANKSGTTPDGTSYLDAAEKQEIKDLLK	0	14	1 (1)	2		0	14	1 (1)	1	206950
Tt_021108-T1	RPS13	40S ribosomal S13	151	17.3	F:GO:0003735; C:GO:0005840; P:GO:0006412	F:structural constituent of ribosome; C:ribosome; P:translation			MGRMHAPGKGISQSAVPYRRSVPTWLKLTPDDVKEQICKLAKKGLTPSQIGVILRDSHGVAQVRWVTGNKILRILKAKGLAPDYPEDLYYLIKKAVAIRKHLERNRKDKDSKFRLILVESRIHRLARYYKSRRILPPNWKYESSTASAMVA	0	40	8 (8)	19	3.99538e+06	0	10	1 (1)	3	454118
Tt_021835-T1		F-actin-capping subunit alpha	289	33.4	F:GO:0003779; C:GO:0008290; P:GO:0051016	F:actin binding; C:F-actin capping protein complex; P:barbed-end actin filament capping			MATDYDEPISEQEKVRIVSDFVLHAPPGEFNEVFNDVRLLLNNDTLLKEGASGAFAQYNKDQLTPVRIDGSKYTGLITEYNDLGNSHYFDPRSQQSFKYDHLRKEATEFQSYEPDQAAESWRSALENTWTRYTEDHYRHGNCSVFGHSHGGNITLVACIEDHQFQPKNYWNGRWRSVWTVTFPLGAGTVELQGLVKVQVHYYEDGNVQLVSSKEIKESLTISTELQTAKEFVQIVEDAENEYQTAISENYQTMSDTTFKALRRQLPVTRTKIDWNKILSYRIGSELKHH	0.003	8	1 (1)	2		0	13	3 (2)	3	799823
Tt_021862-T1		glutathione S-transferase Mu 1-like	226	26.6	F:GO:0004364	F:glutathione transferase activity	EC:2.5.1.18	Glutathione transferase	MTTKPTLGYWNIRGLAQPIRLLLAYNETEFEDKRYNCGPPPDFDRSSWLNEKHSLGLDFPNLPYYIDEDTKISQSGAILCLLARKYKMDGETEQEKIRIDMAEQQLVDFRMGFLRLVYSPDFESLKDDYLKDLPNQLKLFSDFLGKNKWFAGDKLSYVDFIIYEMLDQHKPLAPDCYKDFPNLKEFLERFEGLPTIQSYMKSDKYIKWPLNGDMAKFGSRLQSPPQ	0	18	3 (3)	7	1.41808e+06	0	41	8 (4)	19	1.69103e+07
Tt_022148-T1		serine--tRNA cytoplasmic-like	496	57.1	F:GO:0004828; F:GO:0005524; P:GO:0006434	F:serine-tRNA ligase activity; F:ATP binding; P:seryl-tRNA aminoacylation	EC:6.1.1.11	Serine--tRNA ligase	MVLDLELFRADKGGDPLKIRENQAKRFKDVTLVDKVIESDSQWRKLRYSLDNWNKLKNLCSKEIGTKMKNKEPIGESDELTNNVINKLSELTSDILQTLTVTQIKRIRTLMDEEMVKCGEELTRLEKERNETLKEVGNWIHDSVPISNDEEENEVIRVWGDVETRKKYSHVDLIHMIDGVDGERGAVTAGGRGYYLLNAAVFLEQALIQLALHILHKKKFKILSTPYFVRKEIMQEVAQLSQFDEELYKVIGKSDKDNEASSEEKYLIATSEQPIAAFHRDEWIPTEQLPIRYAGLSACFRQEVGSHGRDTRGIFRVHQFQKVEQFCLTSPHDNKSWEMFDEMIGNAEEFCKMLNIPYRVVNIVSGELNNAAAKKFDVEAWFPGSGAFRELVSCSNCLD…	0	3	2 (2)	3	321394	0	5	2 (2)	2
Tt_022181-T1		ras-like GTP-binding Rho1	257	29	F:GO:0003924; F:GO:0005525; P:GO:0007264	F:GTPase activity; F:GTP binding; P:small GTPase mediated signal transduction	EC:3.6.1.15	Nucleoside-triphosphate phosphatase	MLHLKNSYNYLKKLRKTINFVDLWSNRSCEESAATSMREENKTLGTCALINGFLCTLECLSAPLVIRVEKITDCTQTMATIRKKLVIVGDGACGKTCLLIVFSKDQFPEVYVPTVFENYVADIEVDGKQVELALWDTAGQEDYDRLRPLSYPDTDVILMCFSIDSPDSLENIPEKWTPEVRHFCPNVPIILVGNKKDLRNEPHTIKELAKMKQKPVTSEEGRSMAEKINAYGYLECSAKTKDGVREVFETATRAALQ	0	8	2 (2)	8	1.66535e+06	0	24	4 (4)	13	2.30839e+06
Tt_022199-T1		neuroglian-like isoform X3	1257	139.8	F:GO:0004896; C:GO:0016020; C:GO:0016021; P:GO:0019221	F:cytokine receptor activity; C:membrane; C:integral component of membrane; P:cytokine-mediated signaling pathway			MVHLSLLLLAILLEICSANDVLYIPSPPTIVIQPSQSEQFYHVALTKGEPIIPVILKCEAEGDPQPLYYWTKNGKRFDLDLVGERVTQLKGVGTLNFSHPQASDEGRYQCFAKNPYGVSLSNSVFLRKSELNFFPKEKIKKIEVKEGLPLSLNCYPPKGHPQPYVFWMIQPNSGEPRNINSSRVTLDPEGGLHFSYVTLGDSFNDAVYSCFVSSLFRNELKTGNKRKLIVIPREIGEPVTQQPVRQYVSPANKLILRGDDLQLACIYGGMPIPTVKWYFTKKGPLPSERLGTLIKIGKILKITNISSDNEGIYQCIANNGVGSEQKYSVTVTVESLPYWNVSPTNTQAAEDENVRFECSASGIPPPKLHWLINGEAIEVAESNPRRIIKGNVMTISNLV…	0	15	20 (20)	69	2.44033e+07	0	3	4 (4)	5	2.38206e+06
Tt_022408-T1	sm	heterogeneous nuclear ribonucleo L-like isoform X1	357	38.2					MAATLILQASPQQFCSLGKAPGNERPALLQEPPRFGGGPQNFRGEGGRGPPVAPGYGPDRGDGFDGYDNSGPRSVPPAPGGYGAGEPYAPQERYGGPPPPDRFGRFGGGRDAYDGRPEGPPPGPPGPRGPAYGPMGAPPPGGAGPHQGSVMMVYGLNPEKMNCDKLFNLFCLYGNVIRIKFLKSKEGCAMIQMGDPIAVEKSVTHMNGAMFFDHKMNLGYSKQAFLNDVQQPYELPDGTPSFKDYMGNKNNRFTTPEAAMKNRIAPPSKMLHFFNTPSGITEEELKKLFEDSGVKPPVSVKKFQSKSERSSSGLLEFGGVSDALEALAVVNHKAIPNPDSKFPYITKLCFSTTGPRF	0	69	16 (16)	81	3.81656e+07	0	36	9 (9)	19	1.01711e+07
Tt_022409-T1	sm	heterogeneous nuclear ribonucleo L-like isoform X3	133	15					MAYNGHPAKRIKTEPDARGYGYGYAPNRGGGRGQDEDRANHILLMTILNPAYPITVDVIHTISSPKSAKRAKQSLNGADIYSGCCTLKIEYAKPKRLNVFKNDNESWDYTNPTLEPPEGRQLFNVKHQIQHSY	0.002	11	2 (2)	7	2.14517e+06	0.004	8	1 (1)	3
Tt_022697-T1	Ef1gamma	elongation factor-1	433	50.1	F:GO:0003746; P:GO:0006414	F:translation elongation factor activity; P:translational elongation			MACGTLYTYAANFRAFKALIAAEYSGVQVRIVNGPPEFVFGETNKSEEFRKKFPLGKVPAFETSDNKFIFESNAIAHYIGNEQLRGETALDQAFIIQWINFADHEILPSACTWVFPCLGIMQYNKQAADRAKEDIIKALNVLNSHLLTRTYLVGERITQADITVCCNLLFLYEHVLDPAFRKSFENVNRWFTTLVNQPQFKKVIGDFKLCEKMAQFDAKKFAEFMGKESKGGKKEGKSPKEGKPPKEAKKEKEPKKEEEEELDETEKAIAEESKKKDPFDDFPKGTFVMDSFKRVYSNEDEQKSIAYFWENFDKENYSIWYSEYKYPEELSLIFMSCNLITGMFQRLDKMRKNAFGSVCLFGEDHNNTISGIWIWRGHQLAFELSSDWQVDYESYSWTK…	0	9	4 (4)	13	1.13622e+06	0	33	14 (14)	22	10976078
Tt_022845-T1	FH	fumarate mitochondrial	541	58.5	F:GO:0004333; C:GO:0005739; P:GO:0006099; P:GO:0006106; P:GO:0006108; C:GO:0045239	F:fumarate hydratase activity; C:mitochondrion; P:tricarboxylic acid cycle; P:fumarate metabolic process; P:malate metabolic process; C:tricarboxylic acid cycle enzyme complex	EC:4.2.1.2	Fumarate hydratase	MPIPRLFPFKGLCCSNITVSLQPLNIVSRRILYRKYVDLALVCEGRNARPNISNINKFHPVITSQTMPVHTSSVICKEVDFRIETDTFGELEVPVDKYYGAQTMRSMMNFNIGGQSEKMPLPVIKAFGILKKAAAEVNREFGLDKKIADAICQAADEVIDGTLQDHFPLVIWQTGSGTQTNMNVNEVIANRAIEILGGKLGSKSPVHPNDHVNKSQSSNDTYPTAMHIAVAMEIELSLLPSLKTLHEALLKKSEEFKDIVKIGRTHTQDAVPLTLGQEFGGYAAQIEMGIERVKATLPRLHCLAAGGTAVGTGLNTRIGFAEKVASKIAEITSLPFVTASNKFEALASHDTMVEVSGATNVIACSLMKIANDIRFLGSGPRCGLGELILPENEPGSSIM…	0	5	1 (1)	2	176734	0	4	2 (2)	3	94353.2
Tt_022943-T1		disulfide-isomerase A5-like	644	73.4	C:GO:0005623; F:GO:0016853; P:GO:0045454	C:cell; F:isomerase activity; P:cell redox homeostasis			MATIFRFCFVVIVLLQLVPKCLTQTRRFGSGSFIQIEDISDQKEFKKLLRVKTNVLALFAKSVRDTSEVRKIISDVAIEMKGQATLVFVDCGSEGKKLCKKFKIFPDPYALKHYKDGEFHKDYDRKITVKSMVNFLKDPSGDIPWEEEESAQDIIHISDVNNLEKLLRKEKLPIMVMFYAPWCGFCKRLKPDYSAAATELKGQSVLAAMDVNKPENNIVRHHFNITGFPTLLFFEDGKLKYRYEGENNKDGIVNFMKNPGKAPEKPKEPEWSEVSSDVVHLTDASFNSTIQEEESVLVMFYAPWCGHCKKMKPEYINAASMLKEQNIPGVLAAVDATKHREVADRFKITGYPTVKYFKDGEFAFDANVRTAEKIVEFMQDPKEPLPPPPPEIPWHEKAS…	0	6	3 (3)	5	420681	0	7	2 (2)	4	914343
Tt_022947-T1		glutaredoxin-related mitochondrial-like isoform X2	204	22.8	C:GO:0005623; F:GO:0009055; F:GO:0015035; P:GO:0022900; P:GO:0045454; F:GO:0046872; F:GO:0051537	C:cell; F:electron transfer activity; F:protein disulfide oxidoreductase activity; P:electron transport chain; P:cell redox homeostasis; F:metal ion binding; F:2 iron, 2 sulfur cluster binding			MEIIARASSRRLTSRKVILSSMVCRRIVSFSGLHRCLTSNLNVTGTSRPANLLNDTFLSKTTGYGHSNICFKPLSTAVNGSKEHVDELVKRNKVVVFMKGDPDVSRCGFSNAVVQILRMHGVTYDSHDVLEDENLRQGVKEYSNWPTIPQVYINGHFIGGCDILLQMHQSGEIIEELQKAGIRSALLDQALEEERKNTDSKKPE	0.002	6	1 (1)	1		0	6	2 (2)	4	121226
Tt_022974-T1		kunitz-type serine protease inhibitor A-like	78	8.7	F:GO:0004867; P:GO:0010951	F:serine-type endopeptidase inhibitor activity; P:negative regulation of endopeptidase activity			MYQKLMLLLLVTSLCSFSVIAGFDCWSKPDPGPCYAYFTRYYYDPASHRCKSFIYGGCAGNGNRYKTRSHCLAVCAGT	0	28	2 (2)	11	1.26124e+07	0	28	2 (2)	6	4.07877e+07
Tt_023172-T1		malate cytoplasmic-like	334	36.5	P:GO:0005975; P:GO:0006099; P:GO:0006108; F:GO:0030060	P:carbohydrate metabolic process; P:tricarboxylic acid cycle; P:malate metabolic process; F:L-malate dehydrogenase activity	EC:1.1.1.37	Malate dehydrogenase	MAKEPIRVVVTGAAGQIAYSLLFSVAKGDVFGPDQPVILHLLDIPPMMGVLEGVVMELMDCAFSLVRDIIPTCDEQQAFHDTEAAFLVGAMPRKEGMERKDLLAANVKIFKSQGKALDQFAKKTVKVLVVGNPANTNAFICSKYAPSIPKENFSAMTRLDQNRAQSQIAFRLNLPANCVTNVIIWGNHSSTQFPDASHAVVDVNGTVKKVVDCLKDDAYLKGEFITTVQKRGAAVIAARKLSSAMSAAKAACDHMRDWWNGTAEGQWVSMAVFSDGSYNVPSNVMYSFPVQIGADRKWKIVQGLEISDFAREKMDLTGKELIKEKEDALSVCQD	0	30	14 (14)	52	3.21636e+07	0	18	7 (7)	18	3.32304e+07
Tt_023179-T1	Ndg	nidogen-2-like, partial	171	19.7	F:GO:0005509; P:GO:0007160	F:calcium ion binding; P:cell-matrix adhesion			METLLFSVLLVLGSQQLVQSISRDELYPYGNQDDLLPQADDVSSLEVQITVPIVFYEIVYRSIFVNDNGILSFLTEVPSFYNGQLPRSYPIISPLYTDVDIRGTGRVYYRETKSQRLLTRANNDIQRHFSQGRDFQATSLFIATWDNPKHVRHFLTNLSPQRNDTLLTNTH	0	11	2 (2)	9	1.68552e+06	0	9	1 (1)	4	3.4915e+06
Tt_023180-T1	Ndg	nidogen-2 isoform X1	821	90.7	F:GO:0005509; P:GO:0007160	F:calcium ion binding; P:cell-matrix adhesion			MEGCTSSDNKLDAVVVVNLKMSNVYKSGVWMFHVGKTGQDGNVIPADQGLEPPILSAQTCANAIIPCPPTSNCIDYKQGFCCECGEDYFGNGINCFKKGIDQRMNGKLKGTLNNFKFDDVDIHTYVVTSDGRTYTAVSKIPLEVGYDMQALFTIGEIVGWLFAVPHSGAKNGFMVTGGAFNRTVEIEFPQTGHHVTIDDHFLGPDVYNQMQVVTQIRGSLPTVPIGSKIILNEYEEEFTRISNGLIRSHSSRTYRLQDNGLEVPFQVDQTISFLECKFGSHDPDLDSMKLKHGRTFIVYNEKEEILRYAMTSKISPRSAEGPCRQGSSQCGPNSKCVEEGDNFRCVCEQGYEYLYEDDVNGEKATCLDINECTSGRDNCHLYAECINLPGSFACRCLRG…	0	7	5 (5)	11	2.57956e+06	0	17	9 (9)	34	2.52774e+07
Tt_023181-T1	Ndg	nidogen-1-like isoform X1	159	17.4	F:GO:0005509; P:GO:0007160	F:calcium ion binding; P:cell-matrix adhesion			MDGTERSILIGSNLKLPNMLAVDYERSEICWTDSGLARIECAGFSGENRRVVYTPAAYPFGITIINGNIYWTDWEIHFIQRVNRNGGDAEPLELPLGGNGKLYGITSVPSQCPRVTTLCGSHNGGCQYLCLPNGTGQRTCACPEVDEDSDDVIDCNQVI	0	19	2 (2)	5	455737	0	31	4 (4)	19	9.03856e+06
Tt_023250-T1	snf	U1 small nuclear ribonucleo A	234	26.4					MDIRPNHTIYINNLNEKVNKEELKKSLYAIFSQFGQILSIVAMKTLKMRGQAFVIFKDISSATNALRSMHGFPFYDKPMRIQYAKTDSEIIAKMKGTYVERPKKPKETEVKKGKKKPLKEPPKSQAPSHQPAGAATGFSNQNQPNIAPAAVAPETQPPNQILFLTNLPEETNDMMLSMLFNQFPGFREVRLVPGRHDIAFVEFESEIQSSAAKEALQGFKITPTHAMKITFAKK	0.006	3	1 (1)	2		0	15	3 (3)	3	2.26844e+06
Tt_023267-T1	Sgt	small glutamine-rich tetratricopeptide repeat-containing alpha-like isoform X2	287	32					MSEVKRLVAAIIQFLGDQLHNGDLTSDAKESLEVAIQCLETAYAVRHDSPTSASVTTNRSLLDIFRDATQQQWSLGDDGSSSLPPKACEQDKEKAEKLKNEGNNLMKLEKYTDAIECYTKAIMLDGNNAVYYCNRAAAHSKLNDHHAAIQDCEKAIHIDSTYSKAYGRMGLFQDNTLRFCCFSKRKTHLGNKKPFLVQWGHRWIFRGGQTGEASGSVPNTSLNFSTLLTNPTLMNMATQLMQDSNMQNFGQQLAAQMQASNPELVEQLRRQMGNQNPQSQDKPGADQ	0.019	2	1 (1)	1	176768	0.029	2	1 (1)	2	1.14211e+06
Tt_023343-T1		glutamine synthetase-like	366	41.3	F:GO:0004356; F:GO:0005524; P:GO:0006542	F:glutamate-ammonia ligase activity; F:ATP binding; P:glutamine biosynthetic process	EC:6.3.1.2	Glutamine synthetase	MAVYYGNSTMLNKQTLMKYLSLPQPENKVQCMYVWIDGTGESVRAKTKSVNFIPKHPDELPIWNYDGSSTYQAEGSNSDIYLHPVALYRDPFRGGSNKLVLCETYKYNHKPTESNKRWSCVQVMEKCKAQHPWFGIEQEYTLLDEDKHPFGWPKNGFPGPQGPYYCGVGANKVYGRDVVEAHYRACMYAGINIAGSNAEVMPAQWEYQVGPCEGITIGDDLWMSRFILHRVAEDFGVVVSFDPKPIPGDWNGAGAHTNFSTKGMREEDGLSVIEQAIERLANKHELHIRAYDPNEGKDNARRLTGRHETSSIHDFSAGVANRGASIRIPRQVAEERKGYLEDRRPSSNCDPYSVAEVLVRTVCLEE	0.002	4	1 (1)	1	76667.4	0	9	3 (3)	3	823637
Tt_023532-T1		serpin B10-like	400	44.9					MVSLFISTLLAVAFIQCGCVPTREETDRFARSVVKANNEFTLSLFKSLDKPSNAFISPWSLSVSLGMAYLGAAGATAREMEDALGYRTSGIQGDSVHLGFMTEQTRLNNVQEKYELSSVNAALIQKGYTISQSYINGLEQYYKSAVKEVNFTDSLSVLEWVNAWGYWASHSKINNLLTKKLPETTKMVLLNGVYFKGKWLKPFDPKNTRDETFTNENGQEVVVPLMQMTFDASYAEYANLSTYAISFPYVDEDMSMIVLLPSEISDLKSLEKGLTTAILDDILSHMETQVLKVGLPKFELKDSRNLKKPLKSIGMESSFTNIKADFSGITGNRDLYLEEVIHQAVIQVNEEGTVAAVNTVIQLDNRRKPLELFINRPFLFLIRDNRSGLILFLGRVAELK	0	27	8 (8)	18	1.52266e+07	0	58	16 (16)	55	3.51184e+07
Tt_023942-T1	Vinc	vinculin-like isoform X2	839	94.1					VSRLVILHEEAEDGNAMPDLERPVQAVSKAVTNLIKVGRETINSSDDHILRQDMPVALQRVEKASKLLEDASSLLKADPYSQPARKKLIEGARGILQGTSALLLCFDESEVRKIIRECKKVLDYLAVAEVIESMDDLVQFVKDLSPCLTKVSREVDAREKELTHQVHREILIRCLESVKNLAPILICSMKIFVQILSQGGKGVEEAAENRNYLARRMTDEINEIIRVLQLTTYDEDEWDDDNLTVMKKAQNAITGKLQASHDWLEDPSAVTGGVGEKSLRNILDYAQRVAERSLPPDHDAIKKMCGDITSMTDGLAELRQDGKGASPQAQSLARGIGQKLRELNVIITNAIQNVERSGIQQPAHTVGGRVEQAQQWLANPSFDDKGLGQQAIQSIIQEG…	0	26	18 (15)	77	1.91025e+07	0	42	31 (27)	62	3.94424e+07
Tt_023994-T1	TER94	Transitional endoplasmic reticulum ATPase	803	89.3	F:GO:0005524; F:GO:0016787	F:ATP binding; F:hydrolase activity			MAENKTNPDDLSTAILKTKQKPNRLLVEEAVNDDNSVVALSQAKMDELQLFRGDTVLLKGKKRRETVCIVLSDDTCSNEKIRMNRCIRNNLRVRLGDIVSVQACPDVKYGKRIHVLPIDDTVEGLTGSLFDVYLKPYFLEAYRPVHKGDMFGVRGGMRAVEFKVVETDPSPYCIVAPDTVIHCEGEPIKREEEEETLNSVGYDDIGGCRKQLAQIKEMVELPLRHPSLFRAIGVKPPRGILLYGPPGTGKTLIARAVANETGAFFFLINGPEIMSKLAGESESNLRKAFEEAEKNSPSIIFIDELDAIAPKREKTHGEVERRIVSQLLTLMDGLKQRSHVIVMAATNRPNSIDPALRRFGRFDREVDIGIPDSTGRLEILRIHTKNMKLGDDVDLEKIA…	0	13	8 (5)	17	1.8952e+06	0	13	8 (5)	15	2.36312e+06
Tt_024367-T1	SCRASP2	complement component 2 factor B variant 1	893	100.3	F:GO:0004252; C:GO:0005576; P:GO:0006508; P:GO:0006956	F:serine-type endopeptidase activity; C:extracellular region; P:proteolysis; P:complement activation	EC:3.4.21	Acting on peptide bonds (peptidases)	MKNNMTLIYCLYTIFILVVVGSFIDLVQSAEVTKKCKDPGVSPDGERKGHCCFTGNKLIFSCKKGFDLVGNPLLQCLPSGVWTSPRPLCKPKNAIICPFPPEIPKVTKTAWKSGDYYLPGDEVEMYCETSYRLLSGSEYLYCEENGEWDSQFPVCGVTECKVPEGLENGKISERQDTNLTLVPENFELNFICNQNYRLIGSSWIKCTYLGWSSALPTCQLITCPDPGVPENGLRKGAGPFNIGDRVIFSCFPQYKIIGSEERICLGNGRWSGLLSSCNHPNYYCPDPGVPVGGIKSGSSYDLRDTVHFFCKPGYSFIGSANRTCQMNHTWSGEQVFCLEPYYSDSPTDALTRLNNVLDEKESEQKPISKISLWHIFKTSSNNNFGMSTNKVSKMLANKA…	0	8	9 (9)	26	4.00799e+06	0	26	32 (30)	147	1.34261e+08
Tt_024676-T1		clotting factor B-like	240	27.2	F:GO:0070011	F:peptidase activity, acting on L-amino acid peptides			MKNRLVWVEKIFYVEEQTTFRPSSVIVRFTKKERGIKVFFCIGKSTLDRSVLTYLRSGISFPENKDNSADDLCTTPKNEKGHCKSLPDCPAVLSNIYKEYPTICKWNGLNPDVSCLDVSPFEGVTEPIMPNKGPDLTLPGCGIRGKNPKQPSLFLRQLQPSRAEHTTRKKQASLEPNTFKKEKFVNETAVIKGTEICLKFYLGSLSRHTYSENLPTDLTGYNSLRQQIDIITKLKEQTSD	0.009	3	1 (1)	9	5.58116e+06	0.016	3	1 (1)	3	8.21819e+06
Tt_024683-T1	CLIPD3	clotting factor B-like	262	28.4					MAFSEEDSENRPEVVGGVHSVPYSWPWMVGISQKFGLSERFLCGGAIISSKYVISAAHCFKISNKPVSPSVYTFRVGGHTLNDGTKYDVEDVIVHESYKLSQNYHDIAVLKVKGSISLNDKVIPVCLPKPLFVSQDFKGREATVTGWGDTFFGGARSTVLQEVSIPVVTNKECNSAYSSVASNKYPQGITRGQICAGLSKGGKDACQGDSGGPLVLKESRRWTLVGIVSFGLNCAEPGYPGVYTRVSHYIKWIAANTDLGKQ	0	21	4 (4)	15	3.85179e+06	0	24	5 (4)	19	2.0351e+07
Tt_024887-T1	GlyP	glycogen phosphorylase-like	855	98.6	P:GO:0005975; F:GO:0008184; F:GO:0030170; F:GO:0102250; F:GO:0102499	P:carbohydrate metabolic process; F:glycogen phosphorylase activity; F:pyridoxal phosphate binding; F:linear malto-oligosaccharide phosphorylase activity; F:SHG alpha-glucan phosphorylase activity	EC:2.4.1.1	Glycogen phosphorylase	MAAVPKSDQEKRKQISVRGIAQVENVANAKKTFNRHLHYTLVKDRNVATTRDYYFALAHAVWDHQVGRWIRTQQYYYEKDPKRVYYLSLEYYMGRTLSNTMINLGIQGACDEAMYQLGLDIEELEDVEEDAGLGNGGLGRLAACFLDSMATVGLAAYGYGIRYEYGIFAQKIRGGEQIEEPDDWLRFGNPWEKARPEYMLPVNFYGHVQKTNRGYKWVDTQIVFALPYDTPIPGFRNNVVNSLRLWSAKSPNSFNLRFFNDGDYIQAVLDRNLAENISRVLYPNDNFFEGKELRLKQEYFMVAATLQDIIRRFKSSKFGNRNLIRTSFETFPDKVAIQLNDTHPALAIPELMRILIDIEGLVWEKAWDITVATCAYTNHTILPEALERWPVKLLERILP…	0	1	1 (1)	2	111411	0	6	4 (4)	9	1687436
Tt_024999-T1		calmodulin isoform X1	148	16.7	F:GO:0005509; P:GO:0019722	F:calcium ion binding; P:calcium-mediated signaling			ADQLTEEQIAEFKEAFSLFDKDGDGTITTKELGTVMRSLGQNPTEAELQDMINEVDADGNGTIDFPEFLTMMARKMKDTDSEEEIREAFRVFDKDGNGFISAAELRHVMTNLGEKLTDEEVDEMIREADIDGDGQVNYEEFVTMMTSK	0	25	5 (5)	46	2.79086e+07	0	86	14 (14)	115	1.34223e+08
Tt_025014-T1		drebrin B isoform X1	470	53.9	F:GO:0003779	F:actin binding			ALFGYEKQTNNLMLVSKGDDGLEELVDELNSGKIMYAFCRVTDPNTSLPKFVLINWQGEGAPMSRKGCCANHIHDITNFFKGAHLTINARTEEDVDPPVILERLSKSTASKFNFKERSEPVENTSPVGTNYKRIQPEREINPTEREKFWLKEQEEEQKRVTEDKLKADSAKARFEQERKERELREAQAREQLVKERTSSINKVREAEKNVENALKTSEAERLQWDKQLEENAREEQDRRNRSEQMRRQRSNEAQALISQRTVNAKAIFEKNSCAGQMIGNATAKPPVRIPQEPYRVEEPVAVSDPEHVPVTIPVCQETGSVQQEVEEITKDQEVRDLYTEESFSYTRNLLRDSLPPRQDSELTNPEEEQNWDEPPLEAPPTVRDPLTEMMVEHGIASSP…	0	5	2 (2)	5	2.44178e+06	0	6	2 (2)	4	785139
Tt_025040-T1		matrix metallo ase-17-like	628	72.2	F:GO:0016787	F:hydrolase activity			MADRLCFTISKPLSHTGLLLFGYVLIVGTAPIPNSPSTEMVKFMKQFGYLIDAGPNTDALYSEKGFKEAIKDMQRFGGLPETGVIDEATQKLMTLPRCGVPDVIRKIPSNHSIREKRYVIGAEGWKKRTITYFLANWSPEFEHSETYKNLEKAFEVWTKPTPYLRFKYVRSMSADIIVAFGHGPHGDGYPFDGPGSILAHAFFPYEHGHYGGDIHFDDDELWVDESKGKQDGGLDFFTVATHEIGHSLGLAHSTVPNSVMFPYYKGYNPSFTLDYDDVIGMYELYNANSYFEDEEYDSYFNETDDTRTISSETDETATNPSTDDDIFSERVDKKKGYNETVQKDDDGKTDENVEDDQYKMNSDDDRTNSPTETTDQNDEEYSIDNDGKQTTSESYFPEL…	0	6	2 (2)	7	2.69866e+06	0	3	1 (1)	1
Tt_025070-T1		eukaryotic peptide chain release factor subunit 1 isoform X2	534	60.2	F:GO:0003747; P:GO:0006415	F:translation release factor activity; P:translational termination			MEESSADRNVEVWKVKKLIKSLEAARGNGTSMISLIIPPKDQISRVSKMLADEFGTASNIKSRVNRLSVLGAITSVQQRLKLYNKVPPNGLVIYCGTIVTEEGKEKKVNIDFEPFKPINTSLYLCDNKFHTEALSALLADDNKFGFIVMDGNGALFGTLQGNTRDVLHKFTVDLPKKHGRGGQSALRFARLRMEKRHNYVRKVAEVATQLFITNDKPNIAGLILAGSADFKTELSQSDMFDPRLQAKILKLVDVSYGGENGFNQAIELSAEVLANVKFIQEKKLIGRYFDEISQDTGKYCFGVEDALKALEMGAVEILICWENLDINRFFLKNHASDEEKVLHLTPEQEKDKTYFVDKETGVELELVDSMPLLEWLANNYKSFGATLEIITDRSQEGSQ…	0	5	2 (2)	4	550460	0	6	3 (3)	3	648469
Tt_025321-T1	HNRNPK	Heterogeneous nuclear ribonucleo K	395	43.3	F:GO:0003723	F:RNA binding			MTEYEGSMKRPSEDELESEMVSKRPKNTGPSIDARFLIQSKNAGAIIGKAGSNINRLRKDYKASVTVPDCPGPERILTIVADVDTVGDILLDIIPKLEDYTHHRTMNFECELRMLLHQSHAGCVIGRAGFRIKELREKTGASVKIYTSCCPMSTERIVQMTGTPSVVVRCIKEIFNLISETPIKGFNQPYDPHNYDEEFAPEYGGYGEPGRGRSAPVGRGFRPGGIGPSPRDWRDMDRGPDIHPVRQSLSNRSPWRGPMRGREDSFGDGPSRRGPAPLPFRPPSVANGGAPRGGFGGMDGPPRQSGWMSEDIKVTASAKVNIPREMAGAVIGKGGQRIRQIRRDCGAEINIEDSQPGSNERVITISGNPQEIQMAKFLIQKSMREHGGGGGGRRY	0	14	5 (5)	20	2.98142e+06	0	17	4 (4)	7	1.33932e+06
Tt_025366-T1	14-3-3zeta	14-3-3 zeta-like	245	28.1					MDKDELVQRAKLAEQAERYDDMAAAMKQVTEMGVELSNEERNLLSVAYKNVVGARRSSWRVISSIEQKTEGSERKQQMAKEYREKVEKELKEICYDVLGLLDKFLIPKASNAESKVFYLKMKGDYYRYLAEVATGDQRNSVVEESQKAYQEAFDISKTKMQPTHPIRLGLALNFSVFYYEILNSPDKACQLAKQAFDDAIAELDTLNEDSYKDSTLIMQLLRDNLTLWTSDTQGDGEEPTETQDN	0	31	8 (2)	42	1.44779e+07	0	53	12 (3)	55	7.14527e+06
Tt_025455-T1	RPL4	60S ribosomal L4-like	349	40.2	F:GO:0003735; C:GO:0005840; P:GO:0006412	F:structural constituent of ribosome; C:ribosome; P:translation			MNMAKNRRHPYAVSEQAGHQTSAESWGTGRAVARIPRVRGGGTHRSGQGAFGNMCRGGRMFAPTKTWRRWHRKININQRRYAICSAIAATGIPALVMSKGHKIEETPEVPLVVSDKVQEYNKTKQAVQFLRKMKVWNDIQKVYKSKRFRAGKGKMRNRRRIQRLGPVIVYCSDNGLTRAFRNIPGIETLNVEKLNLLRLAPGGHVGRFVIWTESAFRKLDSLYGTWRKPSEKKKNFNLPMPKMSNTDLSRLLKSEEIRHAIRPTKRVIERRKLKKNPLKNIRVMLRLNPYAAVTRRNTILNAERRKKMKAAILAKKRGLEIPEKPSRHQQAKKPKVKKVKAKKSEKTKK	0	14	5 (5)	10	5.59856e+06	0	4	1 (1)	1	217552
Tt_025576-T1	lap-2	aminopeptidase 6	522	56	F:GO:0004177; C:GO:0005737; P:GO:0006508; F:GO:0008235; F:GO:0030145	F:aminopeptidase activity; C:cytoplasm; P:proteolysis; F:metalloexopeptidase activity; F:manganese ion binding	EC:3.4.11	Acting on peptide bonds (peptidases)	MASTVGEVVPVELCKDECEGNYDAVVIVATGVSENDLGGCVSKFRPYLTAYKEVDDVEGEVAVIALPENMPTKRLVYTPTGPLDRDYDDIRRFGEAAHAGIKRALKAGSKRPLLALSTQTGGMQFYDLVTILGALEALYVPLEIREAKPDKSKKAEHLGVCNFHPEHISQALNLATAIESGRTVARDIGGSDPERMSAPNVEMYVKQVFADASCIKVDVISDEKVIEKEYPLLAAVNRAARSIKRHCARVIFLEYVPEGPVETTVVLVGKGVTYDTGGTDIKAGGVMAGMHRDKCGAAAVAGFFQVLAQLKPKGIKVIGGMSMVRNSVGPDSYVADEIITSRAGVRVRVGNTDAEGRMAMADVLCHLKEKAENEPDPHFFTIATLTGHACLSVGDGYSI…	0	9	4 (4)	19	2.69395e+06	0	37	14 (14)	25	9.10214e+06
Tt_026003-T1	SVEP1	C-reactive -like	242	27.2	C:GO:0005576; F:GO:0046872	C:extracellular region; F:metal ion binding			MISFVHLLFLTYVCVVSPMLNTKVRFFHPDSNIPRLTLIGTLPTVREFTLAYWVKFYQIEGYSNNVFSYARSDDDNEIITWMRSEKGIVHMMLRVHSGSGNEASFLCPGIIQDIWQHITWTWSANSGAVRFYLNGKRCSNTTAVVSKNKEVRPGGMVVVGADQDSVGGGFKIAETLQGELTDLHLWDEVLDENQISILPSSSCTRQGDSELHGNLIDWSSSAFRTFDGVSFHPTHLCLTRTH	0	50	9 (9)	76	1.0258e+08	0	67	11 (11)	52	8.20063e+07
Tt_026087-T1		polypyrimidine tract-binding 1-like isoform X1	527	57.3					MRGSDELLSQTAAVSNGGIMTPKPGHKENNNDAKKAKLDRNLNNPSRVVHVRNIPNEAVETDIINLGIPFGRITNLLLLKGKNQAFLEMADERAASKMVNYYNNSGVPVIRGRTVYVQFSNHKELKTDSTHPGSISTQAALQAAQALSNKIETQGGPNTVLRVIVDNQVYPITLDVLYQIFSRVGKVLKIITFTKNNTFQALIQYPDVITAQAAKLSLDGQNIYNSCCTLRIDYSKLTNLNVKYNNDKSRDFTNPTLPIGDQGLDSLGIGGAMGMMGSPFTGLPSLGSPLTAAYSAAGGIPLGAFALSPVAATSATLGLGGIRLSGQQSFGGCVLLVSNLNEEMVTPDALFTLFGVYGDVVRVKILFNKKDNALVQMSEPHQAQLALTNLDKIKLYGKE…	0	10	4 (3)	12	805686	0	18	7 (5)	11	7.03503e+06
Tt_026107-T4	mmy	UDP-N-acetylhexosamine pyrophosphorylase-like isoform X1	589	66.8					MNIIMSSKSVKTSYPDRSISQPQQKYQKFQNSEDENTSTASGKGIQDMSLYVRRYEGRKRGPPLDSEPHGDVVPCTGEMDVEALRLRLKQYGQEHVLKFWSCLTGKQRTMLYKELSDMDLEEVYSIYKECNQNSGEESEKLDDLLQPIPSELHEGVSSSTPERISGLRNIGLEKISEHKVAVLLLAGGQGTRLGVPYPKGMYDVLLPSHKTLYQLQAERIFRLQQLAEDKTGKPCMIPWYIMTSEHTMDPTIEFFEKHNYFGLKKENFIIFEQDMLPCFTFDGKIILETPWKIATAPDGNGGLYRALRKQGIVEDMEKRGVMYIHVYCVDNILVKLADPVFIGYCVEKGANCGAKVVEKLFPTEAVGVVCKVDGKYQVVEYSEISLKTAQKRNPDGRLT…	0.005	2	1 (1)	1	434284	0	2	1 (1)	1	182064
Tt_026399-T2	GlyP	glycogen phosphorylase-like	857	98.9	P:GO:0005975; F:GO:0008184; F:GO:0030170; F:GO:0102250; F:GO:0102499	P:carbohydrate metabolic process; F:glycogen phosphorylase activity; F:pyridoxal phosphate binding; F:linear malto-oligosaccharide phosphorylase activity; F:SHG alpha-glucan phosphorylase activity	EC:2.4.1.1	Glycogen phosphorylase	MSAIPQSDHERRKQISVRGIAQVENVTNVKKTFNRHLHYTLVKDRNVATPRDYFFALAHTVRDHLVSRWIRTQQYYYEKDPKRVYYLSLEYYMGRTLSNTMLNIGIQGACDEAMYQLGLDIEDLEDIEEDAGLGNGGLGRLAACFLDSMATLGLAAYGYGIRYEYGIFAQKIKNGEQVEEPDDWLRFGNPWEKARPEYMLPVNFYGRVEYAGGRAKWVDTQIVFAMPYDSPIPGFRNNVVNTMRLWSSKSPNSFNLRFFNDGDYIQAVCDRNLAENISRVLYPNDNFFEGKELRLKQEYFMVAATLQDIIRRFKSSKFGSRDPVRTSFETFPEKVAIQLNDTHPALAIPELMRILIDVEDLTWDKAWEISCKTCAYTNHTVLPEALERWPVHLLERILP…	0.002	2	1 (1)	2	653352	0	4	3 (1)	3	211347
Tt_026555-T2		translation elongation factor 2-like	844	94.5					MVHFTVDQIRSLMNKKKNIRNMSVIAHVDHGKSTLTDSLVSKAGIIAAAKAGEARFTDTRKDEQERCITIKSTAVSMYFELEDKDLQFITWENQREKGEKGFLINLIDSPGHVDFSSEVTAALRVTDGALVVVDCVSGVCVQTETVLRQAIAERIKPVLFMNKVDLALLTLQLEAEELYQTFQRNIENINVIIATYSDETGPMGDIKVDPMKGSVGFGSGLHGWAFTLKQFAELYAEKFKIDIDKLMGKLWGENYYNPQAKKWSKKPGEGYKRAFTMFVLDPIYKVFDAIMNYKKEETSKLLEKLNIVLKGEDKEKDGKSLLKVVMRTWLPAGDSLLQMITIHLPSPVTAQKYRMEMLYEGPLDDEAAVAIKNCDPNGHLMMYISKMVPTSDKGRFYAF…	0	24	20 (20)	97	4.89006e+07	0	30	21 (21)	52	1.61356e+07
Tt_026797-T1	CCNB2	G2 mitotic-specific cyclin-B-like	394	44.8	C:GO:0005634	C:nucleus			MALRSMNMDAFNRENTAGGLPKQETKPVKFQRQALGDIKNRVGAVQNVSTRGAVKKQNSLKFKEKSTKTLSRSKSTVSLVTVPENDKSEKDDCVLMDISTSDDDAFSSRLLPDNVKNIDAEDIDNPQLVSEYVNDIYKYLRDLEVQYSIKENHLGKQSQISGRMRSILVDWLVSVHQRFHLLQETLYLTVAILDRFLQENKVERCKLQLVGVTCMFIASKYEEMYAPEIGDFVYITDNAYTKKEILKMECLILSVLEFNLGRPLPLHFLRRDSKAGNADVMMHTLAKYLMELTLPEYHMAHISPSQLAAASLCLAMKLLDKAPWTETLTYFSNYDELQLKSVMKQLCILVLKIDSSKLQAVRLKYSSNKLMKISLIPELKSTVVKEIAGAFDKL	0.023	2	1 (1)	3		0.043	2	1 (1)	2
Tt_026863-T1	REEP5	Receptor expression-enhancing 5	179	20.8	C:GO:0016021	C:integral component of membrane			MISKPNESMNRWMKKLDAKLHESNKFTELLEKIERKTGVKRLYITLGGIALLALYLVIGHGAELICNSIGFVYPAYASIQAIESRNKDDDTKWLTYWVVFATFSVFEYFSDIMLSWFPFYWLAKCIFMIWCFAPVDFNGSQFIYRRFIRPVFLKNKETIDNYIDSAISKATDFAGKGKV	0.003	8	1 (1)	1		0	8	1 (1)	2	829434
Tt_026953-T1		pregnancy zone -like	1500	168.4					MQGIVRKMTNLLLLIFWHISVFLPACFAATKRGYLLTIPSEVKTGTTTQVTLTFFNVTRNGAATLVLRDSNNKVLSSSTATVINGNPTDLVVKVAPDAPHGTAELEVKGEISGTPDYQFHGKGKLYIRPQKTVILIQTDKPAYKPGQKLLFRVFPMNANLQPIGGAHERNVIWIENPSGIRVAQWKNMTFKKGVREFSLPLSKEPVLGNWKIFAMFPGVTTTTTHQQFEVSEYVLPKFEVQVSSPSFVLRGDEEIPLTICAKYTYGLPVRGNLTFKMSIKTFSRRENELPFHVYEKEIYGCYDLAVNIKEKGLHSKSVRNIKLEASVVEKGTGVKQNTTSTIKYHNFRLEIEIDGATEEFRPQLPYFGRAKAKTPNGDPVSDVILSLCADIYGSSRYVK…	0	14	16 (16)	66	2.09204e+07	0	33	33 (33)	43	3.72496e+07
Tt_026976-T1		ATPase inhibitor mitochondrial-like	93	10.7	C:GO:0005739; P:GO:0006783; P:GO:0032780; F:GO:0042030; F:GO:0051117	C:mitochondrion; P:heme biosynthetic process; P:negative regulation of ATPase activity; F:ATPase inhibitor activity; F:ATPase binding			MSSGEWGTGAGKGGGSGGAVRDAGGSFGKMEAAREEEYFRKLQHKQLSQLKSHLHEEIEHHKQLIKQHEREVERHKERIEELKRQEKETQKKD	0.002	23	2 (2)	7	146858	0.033	12	1 (1)	1
Tt_027052-T1	Rab3	guanine nucleotide-binding subunit gamma-1-like	71	8.4	F:GO:0003924; C:GO:0005834; P:GO:0007186	F:GTPase activity; C:heterotrimeric G-protein complex; P:G protein-coupled receptor signaling pathway	EC:3.6.1.15	Nucleoside-triphosphate phosphatase	MNNKQMSTLQQQRKVVEQLRREASIRRVNVSVAIEDLKKYIQEHENDDYLLVGFHSQKANPFREKSSCTIL	0	44	2 (2)	5	848041	0	27	1 (1)	2	3.61064e+06
Tt_027121-T1	SEPP1	uncharacterized protein LOC106468587	376	43.3	F:GO:0008430	F:selenium binding			MLLEGMLQYFRALGIDDLSFLVVNSKDVMSQLMRPYLNRRVTFPVYQETSNEEVWSVLKGGKDDMFVYDRCGVLSYYIPFPQSVITRNNPIIAAAIFSTYFGNPCNNTCGNVTEDSVNYTATTAENVESVNYTATTAENVETVNYTAVNEIDITEAVTMTTEVEANETMTIVTSDYLEPDYNTTTDVYDFSWEITTSENNTDNPLNQDTTTTWLTDNNSTYNYDLNTTEEEKYENVTYIYVHPLDKKTYVLYPQTTSPPNSEKSEIELMFETLFSFFTRSRKDNENKENKVVSHKDTEHSAKYSSKGKLHDDTNHQHICDRVHCEEWTKKQLRLAYKCCKQVSRNKPELSYEVCRNFGKTQCKKAQVVLKCCSLKE	0	7	2 (2)	4	1.43554e+06	0	17	5 (5)	25	2.68341e+07
Tt_027368-T1	RpS8	40S ribosomal S8	208	24	F:GO:0003735; C:GO:0005840; P:GO:0006412	F:structural constituent of ribosome; C:ribosome; P:translation			MGISRDHWHKRRKTGGKQTQSRKKRKFELGRPAANTKIGPKRIHTVRTRGGNKKYRALRLDHGNFSWASENCTRKTRVIDTVYNASNNELVRTKTLVKNGIVLIDATPFRHWYEAHYAVPLGRKKGAKLTEAEEAVLNKKRSKKTEKKYKERQKHAKVEQAVEEQFMTGRVLACISSRPGQCGRADGYILEGKELEFYVRKIKAKKGK	0	45	9 (9)	38	1.3941e+07	0	16	3 (3)	5	995199
Tt_028008-T1	MCCC2	Methylcrotonoyl- carboxylase beta mitochondrial	538	59	F:GO:0004485; C:GO:0005739; P:GO:0006552; C:GO:1905202	F:methylcrotonoyl-CoA carboxylase activity; C:mitochondrion; P:leucine catabolic process; C:methylcrotonoyl-CoA carboxylase complex	EC:6.4.1.4	Methylcrotonoyl-CoA carboxylase	MLIKRAVSFLCRNSFQIRRAFHYENVSPVVGTEPDRSSTDFKENYAAMKNLVDQLKTNVQKVMEGGGEKAKQLQLSRGKMLVRDRIDNLLDPGSPFLELSQLAAWDMYGGEVPSAGIITGIGRVSGVECIIVANDPTVKAGTYYPITVKKHVRAQEIARQNNLPCIYLVDSGGANLPHQAEVFPDVGHFGRIFYNQAVLSSMEIPQLAVVLGSCTAGGAYVPAMADDSIIVRRQGTIFLGGPPLVKAATGEDISAEELGGADLHCRRSGVTDYYAQDDLHALHLARRVAANWNKIKKPNVTITKPEDPIYPADDLYGFVGDNLKRTFDVREIIARIVDGSNFDEFKALYGETLVTGFGRLYGYPVGILGNNGVLFSDSSLKAVHFIQLCCQRKIPLIFL…	0	4	1 (1)	1	295818	0	4	1 (1)	3	1.56693e+06
Tt_028051-T1		prefoldin subunit 5-like	81	9					MGEKMQAVDINKLGLAQLTQLKQQLDQEIELFSSSLQQLKAAHGKFQDSKECVEKLTPGTKGKEILVPLTGSGSFFFIIHL	0	35	2 (2)	6	211210	0	35	2 (2)	5	3.10279e+06
Tt_028189-T1		proclotting enzyme-like	376	41.8	F:GO:0004252; C:GO:0005576; P:GO:0006508; F:GO:0008233; F:GO:0008236; F:GO:0016787; C:GO:0030133; C:GO:0031410; P:GO:0042381; F:GO:0046872	F:serine-type endopeptidase activity; C:extracellular region; P:proteolysis; F:peptidase activity; F:serine-type peptidase activity; F:hydrolase activity; C:transport vesicle; C:cytoplasmic vesicle; P:hemolymph coagulation; F:metal ion binding			MRGNQKYIILLFFGAVYVTSEHTIIDKVVYPYEHPLFGSPCTQSFSGYGNCRDILMCPELLFKSDPAVVRNASCGYDGFIPVVCCSLSNTPGCGYSNHQTTTISNLEEPAADQDKPATNLNTNSTGSTANVLPETVQLAQPEEWPWMAILFTETYTTRKARCNGIFISKLHVLVAAHCVLDEETNQLLPTSRLSLQVWSKSSGSTGTYGNTFRLPVLHVKVHEKFSISSFINDIAILKLDFAAANTGNIQPICLPAEDAPVKTDSFRAYYATVGFTPFNKSLDVEIHTQQLAVWHPSDCKAIYRNIIPSVEGAMCVGESYEEDDCERTSFGQAVMVKTFEGRYFLVGIMSTRPNCKLPWLTVRVTQYLQWIYKNLA	0.004	2	1 (1)	2	294271	0	7	3 (3)	4	1.06779e+06
Tt_028273-T1	SUB1	activated RNA polymerase II transcriptional coactivator p15-like	119	13.4	F:GO:0003677; P:GO:0006355	F:DNA binding; P:regulation of transcription, DNA-templated			MSSKKSRARATASSSSESDSEPVDKTPPPKKAKTDKKPSASNRATASSNQDNDSNMFQLSKMRFVNVREFRGKVMVDIREYYEANGDLKPGKKGISLNMEQWNALKHRIDEIDDAIKQF	0	38	3 (3)	8	911939	0	23	4 (4)	6	1.7931e+06
Tt_028460-T1	Tsp	cartilage oligomeric matrix -like	304	35.5	F:GO:0005509; C:GO:0005576; P:GO:0007155; F:GO:0008201	F:calcium ion binding; C:extracellular region; P:cell adhesion; F:heparin binding			MDNTFVTSEGETIRRDIDADKDLVGDHCDNNVDRDLDGIQDNKDNCPDYPNSDQLDTDEDGKGDACDFDKDNDGISDSEDNCALVYNPDQRDTNGKLVVTSNCPWSSQCNIRLNVRLLWKDPRNVGWREKTAYRWLLLHRPKIGLIRLRIFEGASMVADSGNVFDNTLKGGRLGVFCFSQEALIWSDLVYRCNEAVPSSVYYELPPHLQVEVEIDTTKPSEIIQVGRRIGDVPIHVGEEQGRDTQDTRNEDRRHGEARTEDEQRRRLEERRREELRREEEHRRRLEERRREQYRRYLESSRNQG	0	5	1 (1)	4	1.42019e+06	0	15	4 (3)	9	1.58542e+06
Tt_028520-T1	HAT1	histone acetyltransferase type B catalytic	226	26.4	C:GO:0000781; F:GO:0004402; C:GO:0005634; P:GO:0006348; P:GO:0016573; F:GO:0042393	C:chromosome, telomeric region; F:histone acetyltransferase activity; C:nucleus; P:chromatin silencing at telomere; P:histone acetylation; F:histone binding	EC:2.3.1.5; EC:2.3.1.48	Arylamine N-acetyltransferase; Histone acetyltransferase	MAGISLSKDSLDDYVCSANSAIELKLVQLENDIEDDKKAFHPEYTHQFFGDSESIFGYRDLKVQLYYSAARLTTFLGLKFVEKITPDKSDGVQADEVINVIGEKLQPGFYQNRDDFIASLAKDANFKPHGELLHSFNKEEENTKRTFEVYRATALDPGFKEYHERMQTFVLWYIDAASFIDIDDELWEFFVMFEKLSCDGEPRYCFVGYMTVYRYYAYPNKKRPRI	0.021	3	1 (1)	2	601662	0	35	7 (7)	9	9.67755e+06
Tt_028687-T1		ame: Full=Tachystatin-C	69	8	C:GO:0005576; P:GO:0042742; P:GO:0044179; P:GO:0050832	C:extracellular region; P:defense response to bacterium; P:hemolysis in other organism; P:defense response to fungus			MKWGFQLMAIGVLAVLFFATCQIKPVSADYDWSLRGPPKCATYGQKCRTWSPPNCCWNLRCKAFRCRPR	0	28	2 (2)	5	1.90488e+06	0	28	2 (2)	4	2.81068e+06
Tt_028830-T1		serine threonine- phosphatase 2B catalytic subunit 2-like isoform X1	209	22.9					YAACCEFLQQNNLLSIIRAHEAQDAGYRMYRKSQTTGFPSLITIFSAPNYLDVYNNKVTEMLVNLLKICSDDELMSEGDDTFEGGAAGARKEVIRNKIRAIGKMARVFSVLREENESVLQLKGLTPSGNLPLGVLSAGKTGVRNVLASGRISPQHEISSFEEAKGLDKINERMPPRKDAPSLMSPPEQGTSGSVEEMNRPHDNAIPNNS	0.002	11	2 (2)	3		0	5	1 (1)	2	297354
Tt_028838-T1	HMCN1	hemicentin-1-like, partial	365	40	F:GO:0005509	F:calcium ion binding			VPPKFGKEELDENPSVILNRPITIHCPVTGVPPPAIKWFKNGAQIGRYSDPNVVFSADGRQLKIFRTKVTDAGRYKCVAVNSAGRREKNFNLNVQVPPKITHQSENLVRGPIMKEETVKAVLNGTVKLNCQVIGNPEPTILWLKDGQLLTATEKYGQYQVEHNGQLLRITRVQVSDGGLYTCVASNVAGTSEKDFKVDVLVPPTVKGDEQESPEVLVNRPLSIECPVESHPPSSFSWLKNGVPVNLTNNPFIRLLDGGRTLQLSRTQSSDKGLYTCIAENEVGSAEKHFDLDIHEPPTVQSSSSNPLSVKGDGVQLECNVSGNPTPQVSWLKDGQILTAQDLQGLMDYSGHELKVILTTDGLLWS	0	13	4 (4)	16	8.44568e+06	0	10	3 (3)	7	4.952e+06
Tt_028841-T1		plasma carcinolectin	206	23.9					MMIFAFIWFVFWVGPSLGSETIQKECEDTSITGIVESLDVLVSLAKENLKNRDKHFIHQEMDHICPPSSPGPTDCSDVLLNGHRTSGSYRIWPKSWMTTGSFRVYCDMDTDGGGWTVIQRRGNHGNPKDYFFKPWTNYKVGFGDIQKEFWLGNDRIYALTNQGNYSIKFDLKDKEGNKRFAIYREFWIENEDNLYRLHVSNYSGDA	0	54	12 (11)	147	1.44653e+08	0	47	10 (8)	170	5.29593e+08
Tt_028920-T1		von Willebrand factor type EGF and pentraxin domain-containing 1	336	37.4					MIILSDSLLCLQLKHEPDTLKKFLEGGTHSSNHVKVIVCASFTKSCITLENRPSSAFRHLTGTYKRGAGSDLCKSCPSNSTTLEERSTTIGDCFCIQGYKGNPKTGEPCVPVECVDLAPPDGGVLIPSKCGNTYNSTCSFKCKEGHCPFFCNQTQGAHKEPWHILPSEPRRCLDTRRWSGEEFHCEKIRCSALGYPNNGNHNCTASEFTFGTTCFLSCNKGYTLQGSNLRTCLINGSWTGEETYCKVVECPPLKINKFLKVKPAPCHKLTNAYLTACHFTINCFKTKTTENPVRNNKKLDIKHRVIQAERAVTYLCDKETTVYSFVEGVDRCECRD	0	6	3 (3)	16	1.22355e+07	0	13	6 (6)	17	3.50203e+07
Tt_028921-T1		von Willebrand factor type EGF and pentraxin domain-containing 1	368	40.9	F:GO:0005509	F:calcium ion binding			MQEILRQLVLVHGDLLSKDSEEEGQEYPRYNKVLERPVNKLIEKSLPPTTSVNLKLQYNLQSCPSTDEERENIRKMFIKRLSSLRFMRTLCRTHNACRDLTVQIDCRNSTVIRRKRSLSVDKVITINFNVELPHVDLNENYTCENCTEDSYQNITSILKSAETDISYTLKTAIENVLPDSSPQPTLVHFKLTPHCSEGQVLRKESCVNCPVGTYFNSSSESCSRCPLGSYQDNESSLSCNDCPNGTTTERAGTISVEECKATCHPGTYSATGLQTCIACPNNTYQDNFGQTACKPCPVGSVTWTIGSDSVDYCTTLCSVGTFSDTGYQPCIPCPRGSYQPMPQQTTCISCPPGLTTHKEGAHISQYCQ	0	24	7 (7)	35	1.84176e+07	0	31	9 (9)	45	8.94151e+07
Tt_028922-T1		Kielin chordin	316	35.8					MEFQFTGTCRYTLSEDCSEGEFTLQLEDSTSRSSGKVIYIYTHCVKVEISSGGSVKVDSQLVSLPYKNNSIVHVDPFPGDKSAVQVSTQSGVIVVWYPSGEIQVLVPLRFQKKLCGLCGNYNGILSDDFTTKQHLPARTVVELIHSWKVDGYKHCKLPKIKLKQFSGPRLSLTGACKFSSFTMQRWAFKACSVLRRYTFHQCYYKVDPKPYFQRCLQDACSCMFNEPCFCDAISAYALECRRHNIYVKHWTTNNICEVRCSHGKVYDDCGPACPETCSRVEKNDPTCLWRECVAGCHCPAGMALHNGHCIRFSRCQ	0	16	6 (6)	20	5.6526e+06	0	45	12 (12)	74	6.15401e+07
Tt_028924-T1		von Willebrand factor type EGF and pentraxin domain-containing 1-like isoform X1	431	47.4	F:GO:0003824; F:GO:0005488	F:catalytic activity; F:binding			VINFCEELKPCKEGSTCVNVGGDYQCDCPPGLVGKNCEINEDDCSSDICEHGGTCIDALNGYHCLCLPGFTGINCAHNIDDCVGDPCLNGGTCVDNINSYICLCPKGFTGKSCEINFYDCASNPCQNGATCFDVKDDFQCCCPKGFTGKRCEKTVNKCEDLPCKNRATCVSTLEGFECECQKGFEGTFCEVNIDDCLSNPCLNEGLCVDGVDFFTCNCTPPFTGDLCSSVLPHEFYINFPVALTSSFVDIQSNHHLYAVTVAFWMKTHNKANRGTPLSYAYKNMKTGETVDNALTLLDVNKLVLYIHGKTFRTEIQANSVKPPTCNTVTPRLTEAQRNNAIGRLEAGESRSDVARAVNVHPSTITRLWNRYQQHGSTCDSPRSGRPRVTTPAQDRYIRL…	0.009	2	1 (1)	3	949842	0	8	4 (4)	12	2.6135e+07
Tt_029487-T1	TPMT	thiopurine S-methyltransferase-like	178	20.6					MCGKCVDMKWFYDNGHRVVGVEYVEKAVKEFFQEQGLEYVVEPVEQISGNIYKTADGRMKIFCCEILKFNRDCAGLMDVVWDRGALVAIEKTDRKIFVKLMLSILAPGYRYLLSGFCYDDWFYSGCPRTVPPELVHILFGNHCNLQHLETRDASESMSERTDVSPVLENFWLITERNL	0	9	1 (1)	2	96911.7	0	9	1 (1)	1	518754
Tt_029678-T1		transforming growth factor-beta-induced ig-h3-like	837	94.3					MALIRICGLLLSLLILCATVWATEQPQFRSFSSWDNFYRQIQRYREEFETIQQQAEELATSARGQIEHLWNGAANHFQNVVEKFQLPLGDGREVEGELDSGVNSMGNIPDPSSQHPDAGLSNRPVFDPTVVVVDTPHSPPPGLNTHHWRFDFGFLDNINTMIGFRSRNSWWQGPNICEETEEINEQEVNVTTYTPKGNTTETAEVGYEHFTNCKETETSYICITRIKTKDVNKTYIMKRQCCHGFKRVPHASGCLKLDLKDLIETMTDLETTRFVELAVRTGLEPKLREDNFTIFCPSNEALIDYEEDAVNNEIPSGRIYRSTDLENILTGHITKGYLKTGDLKDELVLPSLRGNSGIRINIYNAPEKIVTANCGRIVKANNYARNGVIHVVDRVLPTP…	0	20	15 (15)	82	5.05773e+07	0	51	31 (31)	172	1.86301e+08
Tt_029982-T1		Succinate dehydrogenase [ubiquinone] iron-sulfur mitochondrial	228	25.9	C:GO:0005743; P:GO:0006099; F:GO:0008177; F:GO:0009055; P:GO:0022900; F:GO:0046872; F:GO:0051537; F:GO:0051538; F:GO:0051539	C:mitochondrial inner membrane; P:tricarboxylic acid cycle; F:succinate dehydrogenase (ubiquinone) activity; F:electron transfer activity; P:electron transport chain; F:metal ion binding; F:2 iron, 2 sulfur cluster binding; F:3 iron, 4 sulfur cluster binding; F:4 iron, 4 sulfur cluster binding	EC:1.3.5.1	Succinate dehydrogenase (quinone)	MQTYQVDLNSCGPMVLDALIKIKNEMDPTLTFRRSCREGICGSCAMNISGVNTLACTCKIDENLGKTTKIYPLPHMYVIKDLVPDMNNFYEQYKSIQPWLHKEEEGKLGQKQNLQSVEDRAKLDGLYECILCACCSTSCPSYWWNSNRYLGPATLMQAYRWVIDSRDEATQERLERLKDPFSAYRCHTIMNCTKTCPKNLNPGRAIGELKKLMAGIAKKDTPQMTGSV	0	10	2 (2)	3	160153	0	11	2 (2)	4	811548
Tt_030365-T1	elgi	lipoma-preferred partner homolog	501	56.2	F:GO:0046872	F:metal ion binding			MTTNKENLAKDFAHLNIANYTPQQYLATKVKKIAPVVPPKPKKKTVPEFANPNAQFLQTEKLSEDKSYQPVLEAGHRERLEQNYTFSQGSKDHSTLETKYPVREERTRQLAEKTYPVKDVKYESNSQKLNQFECVGGLLGNRYATSTERQTGTVCNPPEPPPPSGGRPLYSSCSTLSSDNELPPPPPPPPPQTRYSPPSSNDFPLPPPPVEHQSQSPVKTYDTGPMYDPIILRPSSQVPFNSEPSTDSSLYSKHQSGRTPDTGITSQPLEGCPSTGKEIQVDNLTDLLMKSMENSSDPDFLGICYKCGEKVLGEEGGCTAMSHVYHRRCFTCYVCYKELQGKSFYIVDGNPHCEEDYLNTLEKCYVCGNPICERILRATGNPYHPECFKCVVCGKCLDS…	0	19	7 (7)	14	2.32654e+06	0	15	5 (5)	9	4.68102e+06
Tt_030609-T1	RpL5	60S ribosomal L5-A-like	299	34.7	P:GO:0000027; F:GO:0003735; P:GO:0006412; F:GO:0008097; C:GO:0022625	P:ribosomal large subunit assembly; F:structural constituent of ribosome; P:translation; F:5S rRNA binding; C:cytosolic large ribosomal subunit			MGFVKVVKNKAYFKRFQVKFKRRREGRTDYHARRRLVVQDKNKYNTPKYRMIVRITNRDVICQIAYARIEGDVIVCAAYSHELPRYGVKVGLANYAAAYCTGLLLARRLLRKFGMDEIYKGCEEVTGEEYCVEDIDGQPGAFRAYLDVGLARTSTGARVFGAMKGAVDGGIDVPHSNKRFPGYDSETKEFNAEVHRKHIFGQHVAEYMKMLMDEDEDAYKRQFSRYIKLGITPEDVEEIYKKAHTAIRNDPEHKPKPPRTDIIKKRWNKAKMTYSERTNKLNQKKKSYLKKLEEMEAQG	0	30	10 (10)	39	9.7098e+06	0	8	3 (3)	7	1.01231e+06
Tt_030628-T1	LanB2	laminin subunit gamma-1-like	1641	182.5	C:GO:0005604; P:GO:0009887; P:GO:0009888; P:GO:0016477; P:GO:0034446	C:basement membrane; P:animal organ morphogenesis; P:tissue development; P:cell migration; P:substrate adhesion-dependent cell spreading			MAEQNRVLNRDILVWSYSWKYSFTWIVFLFLINLIRAQNIEEIDLPSHRGTPSRCYDNEGRPQRCMPEFSNAAFDVRVEATNTCGMRGPTEYCLQTSATGAKKACEICDNSFPHLAHPPNYLTDLNNNNNETWWQSETMFEGVQYPTQVNLTLHLGKAFDITYVRLKFHTSRPESFAIYKRTSEDTQWIPYQYYSATCRETYNLPDSSYVSRDEETRALCTSEFSDISPLTGGNVAFSTLEGRPSAYYFENSPTLQEWVTATSLRISLNRINTFGDEIFGDPKVLKSYYYAISDFAVGGRCKCNGHATDCIYTGDTLEEQRLICHCQHNTTGLDCNECLPFYNDLPWARATATDANECQPCNCNGKSNKCYFDRQLYERTGHGGHCIECTDNTDGPHCE…	0	9	11 (10)	40	9.07097e+06	0	22	25 (25)	79	4.16964e+07
Tt_030851-T1	frem3	FRAS1-related extracellular matrix 2-like	3098	347.2					MCWTVSFILFILVSFIIQTDEYLPGVSLSEQDIVKTNSGIKVPFGRAVFVDPVKDLEIRVRDGDRCTIKVIQNDPLSQRPGKLTPSHFPCQFGIREVQYSHFGARTPPQDRVKLLLRYDTADDTIIVPFTINVQVLFDQLEVVTRNMPITVHNLLGVSTPIDDKALQFTYDKNKQNCEVMVLESEELPRYGEVVNISNSGERQNCDSFLQADIRYQHTSYFSPNQDYIPMVVRVTDSNGNLLKHEYFQVTVRIKDGKPNTPPQPSFSSLLLMDVNQFIMTAITPQILSAQDSETIPEKLIFNITSPLGYGEGQIVSTDDQNVPISSFYQKDLDDLKIAYKPPASDSDIKRTFGVEMEVVDAEGLNSDPFSLMIVVHPKNTLVPLATRNSGLMLFEGQSR…	0.002	0	1 (1)	1	91550.3	0	1	3 (2)	5	227870
Tt_030900-T1		thymosin beta-like isoform X1	242	27.6					MSSPKKEDLPKVSPAIKDELAQFDSTKMKHAETKEIQYLPSKEDVEKEKVHNSLLQNVEGFQRSALHHTHPQERVRLPSAEDIAQEKTQQSIVHGVRNFKRNSLKRTSTEEKVILPNESDLKQERVHHNLVTGVENFDKSSLHHAKTTEKTALPNSEDVKQEKVHQSLVTGVEQFDKSTLQHAKTEEKVVLPNSQEIEQEKGQQKLLEGIKSFDTTKMKHSEVTVKNPLPTKDVIDQEKSSN	0	36	7 (6)	27	6.46348e+06	0	37	7 (6)	24	1.06343e+07
Tt_031019-T1		Anti-lipopolysaccharide factor	124	14	P:GO:0042742	P:defense response to bacterium			MMKVTLVALLLMSTYVYRTAAQGGIWTQLALALVKNLATLWQSGDFQFLGHECHYRVNPTVKRLKWKYKGKFWCPSWTSITGRATKSSRSGAVEHSVRDFVSQAKSSGLITEKEAQTFISQYEG	0	52	7 (7)	107	209382396	0	52	7 (7)	49	1.37264e+08
Tt_031099-T1		seleno F-like	95	10.6					MDPDRGVDPGGMGGIHFPSFESLKGLRLGIIVSLMYKAFVKSDRPHQFPGLKIKYVRGADPVIKMYDEAGHVQEELSIQKWDTDTVEEFLKGHLA	0	12	1 (1)	6	1.69188e+06	0	12	1 (1)	3	889686
Tt_031171-T1	alpha-Spec	spectrin alpha chain-like isoform X1	2417	279					MDAQPRDIKVLETVDDIQQRRDQVLHHYTQFKQEARVKREKLEDARRFQYFKRDADELESWINEKLQAASDESYKDPTNLQAKIQKHQAFEAEVAAHSNAIAVLDNSGMEMINRNHFASEVIKKRLDELHGLWELLLSKLADKGLKLQQALQLVQFLRQCDEVMFWINDKEAFVTTEEFGQDLEHVEVLQRKFDEFHKDMASQEFRVVEVNELGDKLIKEGHPEELIIQKKKEELNDAWQRLKALTLLRQEKLFGAHEIQRFNRDADETIAWITEKDLVLSSDDFGRDLVSVQTLQRKHEGIERDLAALEDKVLTIGQEAERLCANHEDHADQIKSKHSEIVSNWEMLKSKAQERRQRLDESYYLHRFLADFRDLVSWINDMKSIISADELAKDVAGAE…	0	3	5 (1)	11	640106	0	3	6 (1)	7	126306
Tt_031312-T1		uncharacterized protein LOC106461179 isoform X1	609	71.4					MSSYSLLRTIVLYLMQVCYQYSENQEPQRIINTSEVLKHQVDTLFLDFWDWRLRESPEFATYLGNHTFDDRLDSYSLQSFQKRKMDAVNFLQKAQNLTLLVQEESTRLNLKVFISDLKTYVEGMDEQGYFYPINSLEGVQLNLKSLVGSMQFQTVDDFWMLISRYRAVKQKVEEIIELLKEAIRQGRTNHAISMKRVPEQFDLIQKEVEHSPFYEPFLSFPEWISLPDKKILKTEGKKVIEREVLPSLKKLGSFIKNEYMTATRPHTGISSLPDGKRFYQQCLRFHTSTDMTPEEIHQLGLQEVKRISREIDMVIKSLGSNLSRSDFLEQLRNDPQFFFKTKQELLLAYKDTVENQIEPKIEQVIKKAPKTKLLIVPFPLSSTETIAAFYVPSSPDGSR…	0	7	3 (3)	6	372345	0.002	3	1 (1)	1
Tt_031353-T1		techylectin-5B-like	244	28.4					MFFPIPVAFLSNLLLVKASFSLDDIKENCKPNDCYDVRRQGFFQSGVYIIWPRFFNQPVKVFCDMVTKGGGWTVIQRRNDTEPRQDFNLPWTSYKHGFGNITGEFWIGNDIIFALTNKENMVLRVDLETFDGEKAYAEYGGFLVRGERDFYKLLLGAYHGTAGDSLSYHNDTYFSTKDKFHNNQCSNTHQAAWWFKDCTKCLLNGIYQSDGLVKPVGQGIYWYQLRNSWDLSLKRTEMKIRPEF	0.006	4	1 (1)	1	693030	0	4	1 (1)	1	1.00416e+06
Tt_031404-T2		RNA-binding Rsf1-like isoform X1	174	18.8					MSRGDSGTRVFVGGLTQDVQKEDLEVEFGKVGKIVSVWVAQNPPGFGFVEFDDREDADEAIKAMNGQLINGTRIRVEMSRGRRGGRGGGRGRGGGSRGRGGGGYRGGRGDFGRRGSSYDSYGGNGGFSRRGGGYRSRDGGGRFDNFDSYDRDYDSYDYKNSGPSYRSRSPIGNR	0	12	2 (2)	4	274421	0	45	4 (4)	6	4.1957e+06
Tt_031562-T1	st13	hsc70-interacting -like	264	30					MAYKFEKQQLNQLQGFIEVCQKHPEVLHLPELSFFSSYLKSLGATIPPPPKPQEESESKSTFDEHPTEEETKEPAEETVGEEEIESDIELDNTGVIEPDNDDTQPMGDESIEVTEEMMDECNEKRGQAMEAFSEGNYEDAIKLLTEAILKNPHSAVLFAKRASIFVKMGKPNAAIRDCDKALSLNPDQALAYKFRGRAHRLLGNWEKAQLDLATACKIDFSEDANEWLKEVLPNLCNCMDVEVYTICRQRHKIISYMEKCKETE	0	9	2 (2)	4	1.07352e+06	0	19	3 (3)	7	1.26387e+06
Tt_031615-T1		oxidoreductase GLYR1 homolog	264	29.9	F:GO:0050661	F:NADP binding			MAYKFTIGDPVWAKMKGFSPWPGKIAFPAKEIKRPALKKPMHCIYFFGTKDYAWILEENIKPYHEFREEFMQKNRLLTFKDAVGQAEEYVKSHPELKSPRIEPNLTFEKKEHVQPQKVKEKTSSSKKPRQKRALSDSSNTSSVSTKKKRSTVTRQIADEASGSAFHVSSSSTSPVENYYTHVNSSPSKYTGLLSRPSYVNRPVTPPLDVENVSDTLKQKNVKASDLKFGFLGLGIMGQGIVKNLLNSGHTVTIWNRTPRKSREL	0.002	5	1 (1)	2	212201	0	9	2 (2)	3	440054
Tt_031636-T1	UCHL3	ubiquitin carboxyl-terminal hydrolase isozyme L3-like	227	24.9	P:GO:0006508; F:GO:0036459	P:proteolysis; F:thiol-dependent ubiquitinyl hydrolase activity	EC:3.4.19.12	Ubiquitinyl hydrolase 1	MSAKWLPLESNPDVMNKFIHELGVPKDWSVVDLVGLDDELLATVPSPVLAVLLLYPSRKQNEAGVEMAKASGQSVSDQVYFLQQTIRNACGTVALLNAIANSADHMKLGNGSTIAKFLNETKSLSPEERGKHLEQEESISAIHEMSAREGQTQTPCIDDEVDFHFMTLVEVDGNLYELDGRKSLPVNHGPTSRENLLKDAASVCRKFIERDPENVRFHVLALAAAAN	0	10	3 (1)	8	849492	0	21	4 (2)	10	2.37172e+06
Tt_031768-T1		T-complex 1 subunit delta	541	58	F:GO:0005524; C:GO:0005832; P:GO:0006457; F:GO:0016740; F:GO:0051082	F:ATP binding; C:chaperonin-containing T-complex; P:protein folding; F:transferase activity; F:unfolded protein binding			MIVKSSAPGNSSISNSKSDTSSFGYRDKDKPTQVRSSNITAAKAVSDAIRTSLGPRGMDKMIQAANGDVTITNDGATILKQMQVLHPAAKMLVELSKAQDVEAGDGTTTVVVIAGSLLDAASKLLARGIHPTTISESFQKAASKSVEILSEMAVPVDLSDRESLLKSASTSLNSKVVSQHSSQLAPLAVNAVMKVIDPTKDTNVDLRDIKIIKKLGGTLDDTELIEGLVFTQKTSGAGGPNKVEKAKIGLIQFCISPPKTDMDNQVIVSDYTQMDRVLREERAYILNIVKQIKKAGCNVLLIQKSILRDAVSDLALHFLAKMKILVVKDIEREDIEFVCKSLVCKPIASLDHFVPEALGSADLVEEIYAGGSKFVKITGVANPGKTVSIFLRGSNKLVL…	0	28	9 (9)	24	3.61949e+06	0	11	3 (3)	5	1.44203e+06
Tt_032154-T1	Eno	enolase	433	47	C:GO:0000015; F:GO:0000287; F:GO:0004634; P:GO:0006096	C:phosphopyruvate hydratase complex; F:magnesium ion binding; F:phosphopyruvate hydratase activity; P:glycolytic process	EC:4.2.1.11	Phosphopyruvate hydratase	MPITKIFARQIFDSRGNPTVEVDLTTDKGMFRAAVPSGASTGIYEALELRDGDKTSYHGKSVGKAVNNVNSVIAPAVLAKNFEPTQQQEIDEFMLSLDGTENKAKLGANSILGVSLAVCKAGAAQKGVPLYRHIADLAGYGEVILPVPAFNVINGGSHAGNKLAMQEFMILPTGASSFTEAMKMGSEVYHHLKNVIKKRFGLQATAVGDEGGFAPDIQSNKEALELIKEAIQIAGYAGKIEIGMDVAASEFHKEGKYDLDFKNPNSDPSQWLTPDALAAMYQEFIRDYPIVTIEDPFDQDHWDAWTSFQAAVQIQVVGDDLTVTNPKRIQMAVEKKSCNCLLLKVNQIGSVTEAIKAHQLAKSNSWGTMVSHRSGETEDTTIADLVVGLCTGQIKTGAP…	0	51	17 (6)	112	1.91898e+07	0	61	21 (10)	69	2.29156e+07
Tt_032157-T1	YBX3	Y-box factor homolog	370	41.2	F:GO:0003676	F:nucleic acid binding			MSEPEKKEVDKPRTEKVKKVLATRVSGTVKWFNVKNGYGFINRVDTNEDIFVHQTAIVKNNPKKILRSVGDGETVEFDVVEGEKGNEAANVTGPEGAPVEGSKYAPDRRRWFYGRFLRRRGFGRRPPRSRSTGSQEQKNEGKEIYEPQRRRRRQRYYPRYFRRPRGPPRGNRQEQLNEEKHDTDEDSSGGGSPQHGQEQGQYSNRRPRRFYSRNSYNRRPRQVRSDTEGSQSGGDLKENEPEKKQNQRNKEDRKPFRRPRFRGSSGLSRGGSRRGPPQSKIDPVDSADNTAGGDEVSNISAASLTTEPGSSTKIAACGDAGQTLELSGGEESSIGNPAAASSDSKLTSDENPTLQSNDVGSVPAEGTVSA	0	5	1 (1)	2	210397	0	5	1 (1)	2	671829
Tt_032271-T1	Gapdh2	glyceraldehyde-3-phosphate dehydrogenase-like	333	35.9	F:GO:0004365; P:GO:0006006; P:GO:0006096; F:GO:0050661; F:GO:0051287; P:GO:0055114	F:glyceraldehyde-3-phosphate dehydrogenase (NAD+) (phosphorylating) activity; P:glucose metabolic process; P:glycolytic process; F:NADP binding; F:NAD binding; P:oxidation-reduction process	EC:1.2.1.59; EC:1.2.1.12	Glyceraldehyde-3-phosphate dehydrogenase (NAD(P)(+)) (phosphorylating); Glyceraldehyde-3-phosphate dehydrogenase (phosphorylating)	MAKVGINGFGRIGRLVLRSCLDKGVEVVAINDPFIDLNYMVYMFKYDSTHGRYKKDIKAEEGVLIVDGHKIQVFQEMKPNAIPWGKAGADYVVESTGVFTTIEKAKPHIEGGAKKVIISAPSADAPMFVMGVNHDKYEPSMEIISNASCTTNCLAPIAKVIHDNFGIVEGLMTTVHAVTATQKTVDGPSSKAWRDGRGAGQNIIPASTGAAKAVGKVIPDLNGKLTGMAFRVPVADVSVVDLTCRLQKEASYDDIKNAVKAASESDNWKGILAYTEDAVVSSDFIGDSHSSIFDAGAGISLNKNFVKLVSWYDNEYGYSCRVADLIKYIHSKA	0	33	8 (4)	38	1.01946e+07	0	36	10 (6)	29	1.22453e+07
Tt_032460-T1	Pvf1	vascular endothelial growth factor A-like isoform X2	111	12.4	P:GO:0007165; F:GO:0008083; C:GO:0016020	P:signal transduction; F:growth factor activity; C:membrane			MKDVENPTEFMTQFLSYIPLQGRLSSKNGQNNIASSAKCKPELQVVEIPKPHDSMTIIWPSCTRINRCGGCCSSSLLDCVPKRTSTIHLKWFSTCGTLRQSENYRSTPGKP	0.002	21	1 (1)	1	525659	0	21	1 (1)	3	3563807
Tt_032550-T1		unc-112-related -like	682	78.1					MISDGQLVGDGSWNLHVHITDLQVERILRVKGDLHIGVIMLNLVEDLDVTLDWSDHALWWPAKNKWLLRTKSTLDQCGVQADALLHFSPMHKVLRIQLPDLRFLDCKVDFSVKIFSAVVKLCRELGIRCPEELSFLRPLGPEHLKRNYRYIECSPKQRSKEQGSSLESSSLSSSTSGKAELDPEVLGMPGSGPVWNNSGNSSSNGTFNGSYIGTHSSLGEESFLSQDFPLAQSPKTPTEKARQGLLYPKSLIEKGRLNVSWLDSSLSLMEQNVREFDLLLLKYKLFHFYDLNPKYDAVRINQIYEQARWSILTEEIDCTDEEMMLFAALQLQVNMEAKIPQPELLKGEDDVDAALNNLQVSLEGSAISETNGNLTSIPEISDYLKFMKSKRFTLKGFKQ…	0	10	5 (5)	10	638214	0	13	8 (8)	18	5.53517e+06
Tt_032552-T1		alpha-actinin isoform X1	795	91.9					MTESYRDGYMEPEEEWEREGLLDPAWEKQQRKTFTAWCNSHLRKAGTQIENIEEDFRNGLKLMLLLEVISGEMLPRPDKGRMRFHKIANVNKALDFIASKGVKLVSIGAEEIVDGNIKMTLGLIWTIILRFAIQDISVEEMTAKEGLLLWCQRKTAPYRNVNVQNFHLSWKDGLAFCALIHRHRPDLLDYSKLCKDNPVENLNLAFDVAEKHLNIPKMLDAEDLNTTAMPDERTVMTYVSSYYHTFSGAQQAETASNRICKVLKVNQENERLMDEYERLVSDLLEWIKKTTPWLENRTTDNTLSGVQENLEEFRKYRRVVKPPRVEQKAKLETNFNTLQTKLRLSNRPAYLPSEGKMVSDIASAWKTLETAEKGFEEWLLSEMLRLQRLDHLAQKFQHK…	0	4	2 (2)	3	87646.9	0	24	15 (7)	24	3.39404e+06
Tt_032754-T1	SmB	small nuclear ribonucleo -associated B isoform X2	230	23.8					MTVGKNNKMLQHINYRIRVILQDGRAFIGTFKAFDKHMNLILGDCEEFRKVKAKSSKQPEREEKRVLGLILLRGENVVSLTVEGPPPPEEGLPRVPIPGAAPGPGIGRAAGRGVPAAPVGSAPAGLQGPVRGVGGPSQDVMTPQGRGASLSAPPQIRPAMGPPNVGGPPRMGGPMPGRGMMAPPPGMMGRGMPPGQMPMGGPPPGMRGLPPGMMRGGPPPGMRPPPRPSQ	0	16	3 (3)	6	890610	0	9	1 (1)	2	549492
Tt_032763-T1	Got2	aspartate mitochondrial-like	430	48.2	F:GO:0004069; C:GO:0005739; P:GO:0006533; P:GO:0009058; F:GO:0030170	F:L-aspartate:2-oxoglutarate aminotransferase activity; C:mitochondrion; P:aspartate catabolic process; P:biosynthetic process; F:pyridoxal phosphate binding	EC:2.6.1.1	Aspartate transaminase	MSITSTKAVFHPSFLKSCQYSLAAVLSRSCSWWSHVEMGPPDPILGVTEAFKRDTNPKKVNLGVGAYRDDQGKPFVLPCVRKVEELMMAKHMDKEYAAIHGLQEFCQASAVLAFSENSSVIKEGLNATIQGISGTGSLTMGAFFLRDFFKGNKEVYMPAPTWGNHIPLFKKAGFAVKQYRYYDSKTCGLDFTGLLEDISKIPENSIILLHACAHNPTGVDPKPEQWKEMSDLIKSRKLFPFFDMAYQGFATGDIDRDAMAVRMFVDNGHRIGLAQSFAKNMGLYGERVGAFTMVCNSKDEAQRVLSQLKIIIRPTYSNPPIHGARIAQMILVEPELREQWLKDVKGMADRIISMRTRLRDGLKREGSTRNWQHITDQIGMFCFTGMNPKEVEKLTADFS…	0	20	7 (7)	22	5.89295e+06	0	36	13 (13)	30	4.99969e+07
Tt_032997-T1		ame: Full=Coagulogen Contains: ame: Full=Coagulin chain A Contains: ame: Full=Peptide C Contains: ame: Full=Coagulin chain B	154	17.3	C:GO:0005576; P:GO:0042381	C:extracellular region; P:hemolymph coagulation			MEKKLFGIALLLTTVASVLAADTNAPICLCDEPGVLGRTQIVTTEIKEPEHSRCYNFPPFTHFKLECPVSTRDCEPVFGYTVAGEFRVIVQAPRAGFRQCVWQHKCRFGSNSCGYNGRCTQQRSVVRLVTYNLEKDGFLCESFRTCCGCPCRSF	0	58	12 (12)	1569	9.19317e+09	0	55	10 (10)	660	9.27854e+09
Tt_033335-T1		fucolectin-1-like isoform X1	255	29.3	C:GO:0016021	C:integral component of membrane			MIKQPVLILQVFFLFSTTSIIFSWRMLYLPVIVKYGSMKLDHKRFLPCARECLATSWCSCFSNAYVETNNVHCHLYKDQQPSEGENFFSIVSLDVTRGNLALSKPVKQSSNYHIFKPEYAVDGDRICSSPNFSHTKFEDKYPWLQVDLGKEHVVQSVTIWNRQDCCRFKLHDFEIRVGNNKITDDYVTKVFDANGLCGRHVGGGIETDPFTMMCEPCSLAGRYVTIQITHFCSDCPEPNINVLHVCEVEIYGFEV	0.002	4	1 (1)	2	256198	0	18	3 (3)	9	1.89874e+06
Tt_033517-T1		syntenin-1-like	299	32.4	P:GO:0007154; P:GO:0023052	P:cell communication; P:signaling			MSLYPSLEDMKADHMLKAQAQSVQHVERGQEALPYPVQPSSVSAPIDKYSSLYPTLDEYMGLSLNPEAIAEYMPHAVDILPPGQVATPNASSQMVAPISGSSLGLKRAQITHGIREVTLCKDKNGKIGLRLHSVNKGVFVALVNAGTPASLAGLRFGDQILMINDEVVAGYNMDKVHGLLKKSPPEKITMAVRDRPFERTITVHKDSTGHVGFAFKNGKIIAIVKDSSAARNGLLTEHHLLEVNGQNVVGLKDSEITRIIEGGGNVITVTIMPSYIYDHIMKSMASGLKKLMDHTIPDV	0	20	4 (4)	7	2.49106e+06	0	18	3 (3)	7	3.71665e+06
Tt_034336-T2		synaptic vesicle membrane VAT-1 homolog-like	429	46.9					MSEVEAAGDNVNNEESNPPENKTENKNEEEQLEPPKEMKAVVLAGFGGLKSVKVMKKSQPSVGEGEILIRVKACGLNFLDVMVRQGVIDSPPKTPFILGFECAGEVESVGEGVTDVKVGDRVAALTEYKAWAEFVSVPAKYVYTLPQGMEFQNAASLLMNYVVAYILVFDIGNIRSGQSVLVHSAGGGVGQAVSQLCKTVSDVTLIGTASKHKHESIKDSFTHLLDHGVDYVQEIKKLSPEGVDIVLDCLYGDDANKGYNLLKPLGRYILYGSANIVTGETKSFFSLAKSWWQVDKINPMKLFDENRSVSGFQLRHLLYQQGAHDYVRGVVNKVFKMWEDGHIKPVVDSTWAFEDVPEAMQKLHDRKNVGKIILDPSMEPKPKPKLQTKGSKDKEKDKD…	0	13	4 (4)	13	2.04268e+07	0	52	20 (15)	59	6.36617e+07
Tt_034432-T1	RpS25	40S ribosomal S25-like	118	13.3	C:GO:0005840	C:ribosome			MPPKQQPKKDPKAATAKKKKEGGSAGGKAKKKKWSKGKVRDKLNNLVLFDKATYEKLLKEVPMYKLITPSVVSERLKVRGSLARRALEELHQKGLIKQVVKHHSQLIYTRTTKGDDAQ	0	42	8 (8)	35	3.40518e+07	0.008	8	1 (1)	1	862882
Tt_034607-T1	TSTD3	heat shock 67B2-like isoform X3	120	13.2					MSLSEIKYDELSKLVKSGQVTLVDVREPSEVQSDGKIPGSINVPVSKVEKELQLSPAEFQASYGRSLPDKTDDKVVFHCRAGMRACQATEVARKLGFTSARVYKGSFQDWQANGGKIEKP	0	27	3 (3)	4	425264	0.016	6	1 (1)	6	3.82848e+06
Tt_034659-T1	PLEKHB2	pleckstrin homology domain-containing family B member 2-like isoform X1	301	34.4	C:GO:0016021	C:integral component of membrane			MTHLYGNKCIICRSTAPEVMRHSRESTRQIGMQVINHYRVTYRNFTNFVAYYISRMRSFKAHYRGDTTNNVITGTLLAEVVSHTNEVENDSGDMDNSVIAKSGWLLRQTTILKKWKWSWVELYRDGQLKYYENEHSPNAEDIILMTTDCLAIKTGSQVEGVQPPEGRGVQYLFSVVASSGKTWIFCGESLDDMRAWQLALEQARLFGIQPRTCGQPPPYLPYSPGYLPAYTGDSSLTYVQPYPYPQTPYYPYLSAYGSPQVQNPLVYQPQRYYRPDGTDMAMGMLAGTALGTMMWGPVLWW	0.027	4	1 (1)	1	195581	0.007	4	1 (1)	2	4.33281e+06
Tt_034669-T1	Atg3	ubiquitin-like-conjugating enzyme ATG3	235	27.2					MQSVINSVKGTALGVAEFLTPVLKESKFRETGVVTPEEFVICGDHLVHHCPTWQWASGDDAKIKPYLPRDKQFLMTRNVPCYKRCKQMEYSEEQEKLIETDDDEGGWVDTHHYTEGTPISVADQVHEMTLDLKSSDDPSPREESDEDDDEEAEDMDAFVESGMLDNEDKATLEIPNSKDQKQDTSNLYENEIVSTRTYDLNITYDKYYQTPRLWLYGYDEVKKKSAFHKLVYMLQ	0.002	6	1 (1)	2	386297	0	6	1 (1)	2
Tt_034670-T1		propionyl- carboxylase alpha mitochondrial-like	721	80	F:GO:0005524; F:GO:0016874; F:GO:0046872	F:ATP binding; F:ligase activity; F:metal ion binding			MSNFVLRSVSIFHRFPAFGLFSTAKRVELLSRQALCTTNGLFTIYTADPINPKEDKFEKILIANRGEIACRVIRTCREMGIKTVAVHSDVDSMAVHAKMADEAYCIGTAPTSKSYLNMDAILDVVRETGTQAVHPGYGFLSENMEFARRLAENNVVFLGPNAKAIHAMGDKIESKRIAKSAGVNFIPGFDGVVKDVEDCIKIANDIGYPVMIKASAGGGGKGMRIAWNDKEAAEGFKLSRDEAASSFGDDRLLVEKFIDNPRHIEIQVLCDKHGNAIYLNERECSIQRRNQKVIEEAPSTFVDPPMRKAMGEQATALALAVGYDSAGTVEFLVDSKKNFYFLEMNTRLQVEHPITECITGVDLVHQMIRIGKGHKLNLKQSDIPVRGWALESRVYAEDP…	0	2	1 (1)	3	348823	0.044	1	1 (1)	2	12070522
Tt_034831-T1	HCLS1	src substrate cortactin-like	567	64.2					MSMWKATVGRDVKVNNKNNADDDDWETDPDFINDVTEEEQRWGSKTIEGSGRTAGAIDIADLRARVTQDDADFKKKEMESGPKASFGYGGKFGVQQDRMDKSAVGHDYVAKVEKHVSQTDAVKGFGGKYGVQKDRKDKSALGWDYHEKLEKHASQKDYATGFGGKYGVQEDRKDKSALGWDYHEKTQKHESQTDYAKGFGGKYGVQEDRQDKSALGWEYHEKTQKHESQTDYAKGFGGKYGVQEDRQDKSALGWEYHEKTDKHPSQKDYSQGFGGKYGVQVDRKDKSAHGWEEVTKAEAHPSQVDMKKGFGGKYGIQSENQDKSALPYTDVEKPKSSYEKVKPEKVPQKATGLRAKFENLAQAEKEEANKRAEEERARRLAREQQEREEAKKAEEERQK…	0	7	3 (3)	4	1.91089e+06	0	11	3 (3)	4	1.9613e+06
Tt_035338-T1	Ugt	UDP-glucose:glyco glucosyltransferase 1-like isoform X1	1210	136.1					MEITGLKVCIFLIVFSYVRAKSQKSITVQLDAKWLDTPLYLEASEYLAEDSPDYFWKYVESIVRLGPGAIQQKTAKQQYEVVIDIASKLLSPPKLAFLKFSFALRVYSPTIEMFHQIAKSTHFPSDCDSVAQVGGDLFICDPEELKTALASESKKSHADTYQVDHHYPGSTSAPVTVILYSEIGTPSFIELHQYLKSKAEKKEVDYVLRHYIRRRSNKKVKLSGYGVELAIKSTEYKAQDDTQVKDEKQIDENEEEQDKPDEVEGFIFTKLHDLYPEKKTELENFKNFVLDSTKEVATLKVWELQELSLQAAQKIISSPVEESLKVMQDIAQNFPTQARSLVHISVKPEIKKEIDKNQQMFMQHHNLAPSDVALFINGMYFDMEITDVFSLVQVLKQET…	0	5	4 (4)	6	878003	0	15	12 (12)	21	3.55032e+06
Tt_035544-T1	eIF-4a	eukaryotic initiation factor 4A-I-like	414	47.5	F:GO:0003743; F:GO:0004386; F:GO:0005524; P:GO:0006413	F:translation initiation factor activity; F:helicase activity; F:ATP binding; P:translational initiation	EC:3.6.1.3; EC:3.6.1.15	Adenosinetriphosphatase; Nucleoside-triphosphate phosphatase	MSYYGEKYQSDERRGVDQEYDGPPGMEPDGIIESNWEQVIDNFDDMNLREELLRGIYAYGFEKPSAIQQRAIVPCIKGFDVIAQAQSGTGKTATFAVAILQQIDITLQECQALILAPTRELAQQIRKVVIALGDYMNAQCHACIGGTNVREDFRKLEMGVHVVVGTPGRVYDMINRNALKTSHIRMFVLDEADEMLSRGFKDQIYDVFKFLGSDIQVILLSATMPADVLEVTKRFMREPIRILVKKEELTLEGIKQFYVSVEREEWKLDTLCDLYETLTITQAVIFCNTRRKVDWLTEKMHQRDFTVSAMHGDMDQKERDVIMREFRSGSSRVLITTDLLARGIDVQQVSLVINYDLPTNRENYIHRIGRGGRFGRKGVSINFVTEEDKRTLRDIEQFY…	0.002	3	1 (1)	1	167633	0	5	2 (1)	2
Tt_035618-T1		uncharacterized oxidoreductase	492	55.9	F:GO:0003824; F:GO:0050662	F:catalytic activity; F:coenzyme binding			MEQTFKPVLTITELTSHTSKFFFFIYFFSLAVRFLAPNYRVWDEERSFDLSTTRRTSALHISAYLLMIYKSIEVVLVTGATGFVGTHVIKLLQEDGYKVRGTVRSLQNEEKLKPVKELCPDAQQKIELVEADLTKDEGWNEAIKDCSYIIHVASPFPNVPIANEDDVVKPVVEGTKRVLQACADAGTVKRVVLTSSIAAIHGETTVEEGKVYTESDWTNTELATLDYYSKSKTMAERAAWDFVKDLPEDKKFELAVINPSLVLGPVLTSTLGTSNEIVKRLLERGMPLVPKVNFSVCDVRDVALAHLKAMTTPSSDGHRHIISTQTVWLKDIALMLTKEFKPQGYRVPTMNAPYFAVWLNSFIDKSTRLLLPRIGREFKFDNSRMKEVLDIIPRDLSQT…	0	7	3 (3)	14	1.65766e+06	0	42	17 (14)	56	3.86285e+07
Tt_036250-T1		ame: Full=Techylectin-5B Flags: Precursor	316	36.1	C:GO:0005576; F:GO:0030246; F:GO:0046872; P:GO:0098609	C:extracellular region; F:carbohydrate binding; F:metal ion binding; P:cell-cell adhesion			MHTVLYSNMKNMFQLLSFLCVSLLVAGDVHHHAACSTVCSLKGILDSVSDLTDLAKERLATLQNPICSKDKAFYMETYTNVTQNKAEKNGLPINCATVYQQGNRTSGIYMIWPLFLNHPISVFCDMETAGGGWTVIQRRGDFGQPIQNFYQTWESYKNGFGNLTKEFWLGNDIIFVLTNQDSVVLRVDLEDFEGGRRYAEAVEFLVRSEIELYKMSFKTYKGDAGDSLSQHNNMPFTTKDRDNDKWEKNCAEAYKGGWWYNACHHSNLNGMYLRGPHEESAVGVNWYQWRGHNYSLKVSEMKIRPIIFVPGEGLPK	0	25	9 (9)	74	8.62733e+07	0	49	15 (15)	107	1.51906e+08
Tt_036330-T1	RpL18	60S ribosomal L18-like	188	21.6	F:GO:0003735; P:GO:0006412; C:GO:0022625	F:structural constituent of ribosome; P:translation; C:cytosolic large ribosomal subunit			MGIDINHKYDRKVVRREPKSNDIYLRLLVKLYRFLARRTGAKFNKIIMKRLFMSKINRPPLSLARLVRMMKKPGREGKIVVVVGTVTDDPRIFEIPILKLCALHVTERARARILKAGGEIMTFDQLALKTPRGKGTVLIQGPRKAREACRHFGKAPGVPHSHTKPYVRSKGRKFERARGRRKSRAFKV	0	32	5 (5)	8	1.38251e+06	0	7	1 (1)	1
Tt_036460-T1	H1FOO	sperm-specific PHI-2B PHI-3-like	261	29	C:GO:0043229	C:intracellular organelle			MADTDTEGDVAPDNETRVTDEGEGNAEDNAEDGTPISTKKARGKRKASATPSHKRQRAANAKKPKVIGSAEAANKSETKTTSGRKKKKSPVTHPRTLDMAIEAISSLNEPSGASYQAIRRWILDNYHTVRPDMIKVMLRRAFTQGLQEGYLWRPRSQQMTQVLSGRYHIAPSKAKSMLAKSPRLRSLQNKANKKISAKKSKATSKKIKIKIAQSTPKKKPVPRSPKKQPKKSVVRRKTKPETPKKKPGKISQRNLKSKKKK	0	43	11 (11)	128	1.10939e+08	0	43	10 (10)	52	3.82767e+07
Tt_036510-T1		histidine triad nucleotide-binding 1	117	12.9					MAEEGGDTIFGKIIRGEIPAEFVHQDDKCVAFHDINPQAPVHFLVVPKKPIPQLSKAEDSDEEVLGHLLFIAQKVAKDLGLNNGYRVVINDGQHGGQEVFHLHVHVLGGRQMIWPPG	0	29	2 (2)	4	205121	0	57	5 (5)	13	6.05963e+06
Tt_036741-T1	tun	N-terminal glutamine amidohydrolase-like	197	22.8	F:GO:0016811	F:hydrolase activity, acting on carbon-nitrogen (but not peptide) bonds, in linear amides			MSVVEIRLRRCSYLVHLPTSNEENVWKLCEFVAKEQPELIKYCNVVFISNENQTVPLWNQRAGSADDLTVWDYHVILIHTPPDQGPALVYDLDSTLPFPVDFSTYGCQTLKSDFLLKPEFHRKFRIIPAEMFLKKFTSDRSHMRNPDGTWIKKPPSYSCIQTSESTNNLKEFISMKAGTGIGEVMNLNQFIEKYFPD	0	9	1 (1)	2	349137	0	22	4 (4)	8	8.41729e+06
Tt_036908-T1	Hsc70-4	heat shock 70 kDa cognate 4-like	648	71.3					MAKTPAIGIDLGTTYSCVGVFQHGKVEIIANDQGNRTTPSYVAFTDTERLIGDAAKNQVAMNPQNTVFDAKRLIGRKWDDPTVASDMKHWPFDVVNDSGKPKIQVEYKGEMKTFYPEEISSMVLTKMKEVAEAYLGKTVTNVVITVPAYFNDSQRQATKDAGTIAAMNVLRIINEPTAAAIAYGLDKKGSGERNVLIFDLGGGTFDVSILTIEDGIFEVKSTAGDTHLGGEDFDNRMVNHFVQEFKRKHKKDLSTNKRASRRLRTACERAKRTLSSSTQASIEIDSLFEGIDFYSTITRARFEELNADLFRSTLDPVEKALRDAKFDKSQIHDLVLVGGSTRIPKIQKLLQDFFNGKELNKSINPDEAVAYGAAVQAAILNGDKSEEVQDLLLLDVTPL…	0	38	19 (12)	66	1.73442e+07	0	32	17 (11)	48	4.19752e+07
Tt_037259-T1		signal transducer and activator of transcription 5B-like isoform X2	907	103.2					ETEEELRRMQQEQESFVIQYQESSKRQAQIQQLTNQTNTQTNLEMLTKLQRDKELLDEALRQKASSLVQQRQVLADRHKDTLLQVHSLQTRVLDDELIKWKRNQQLAGNGAVFDNNLDQIQEWCEYLVEIIWQNRQQIKRVEMLCTQLPINSSMGNILEKFHSLNSEITGLLSSLVTSTFVIEKLPPQVMKTNTRFTATVRLLVGGKLNVHMTPPQVKVTIISEAQANSLLKNKVGMTEASGEILNNTGTMEYHHATRQLSVSFRNMQLRKIKRAEKKGTESVMDEKFSLLFQSEFKVGGEELVFRVWTLSLPVVVIVHGNQEPHAWATVTWDNAFAEPGRVPFAVPDKVPWLQMAEVLNMKFRAACGQGLSAENLQYLATKGFRNSQIQDFSNMVITW…	0.011	2	1 (1)	2	87509.6	0.002	1	1 (1)	2
Tt_037594-T1		mite allergen Lep d 7-like	215	24.3					MSSFWKIILILSAILIIGGDGEKPICLENINADPYAEKILLKVADIIDEPIRLPDYYKGRLLDLYNGTLMGVRSLHRSGHSVVTCEKDALYHEIPITITDVFAEYRWELHFLNWKKHGSVFVKGILLKATAVIKQELKRGVKPVVHKFVIDNVSKPSVKFTGISSFIQGLVGSISTTVVRIIPKLIYNALEKPLHVALEKAINEIFSVNRRNSYK	0	21	5 (5)	46	2.27439e+07	0	38	7 (7)	32	2.78669e+07
Tt_037599-T1		chorion peroxidase-like	806	90.3					MKVTVGSLFILLITTISIQGKRERRKRQVLPFDTSLSYPGQFGPSVETPCRTSNGNSGICKVPSSCLFAFNNIEDLQESVCHQSNNGVGICCPQDSTGILQPIPFKIPTLDKPIRVNMPEISNNDLNIAGRAGQAALTELQNLEEELKRLGLVAERGTSVFMHQAFFGTKDITQKIGRDGFVGLRASQQLAKKFQLDVNQGNDGLSGFSLQSTVVNSICPVIPPCPSTKYRAIDGSCNNLQNPTWGKSFTAFIRLLRPEYADGLNEPRIASDGSPLPSPRDVSVAGSPDMNVPHRRFTLLIMQFAQFLDHDLTLVGLTKASDGSGIVCCKEQIIKNTRLRHPACFEIAISKNDPFFSRFGETCMEFVRSLPAPRPRCSFGPREQLNQLTAFIDASNVYG…	0	47	37 (37)	230	2.6273e+08	0	68	44 (42)	315	9.4755e+08
Tt_037642-T1		methyltransferase 27	204	23.2					MFSLKFNYRKEGPMLVQRYVSEFTTLQSSHKDTQGAICGLPTTGIETRFLALYVRRHTEFLQEIASFDYNGPKLMAKEFEKLNVPKDAKLIDLAAGTGALGKELKALGYSCIDALDGTKGMLEVAKKKNIYRNLFQFFLGCEDKSPISEEHFTQQLEKPNDLNKNLWSYKYDTNKLKPNSSQHTPSLINEHKNTSRKGEFTPGI	0	6	1 (1)	4	1.39559e+06	0	6	1 (1)	2
Tt_037704-T1		uncharacterized protein LOC106478823	923	103.1					MAATEATAERFEFREKFLFLLVFFLYLGLCANFYYTYSVSKICSVNPPSDSYFTVDLSQRQSFETHTRPTPAENTFIVNADDERSRAVDVSHERGKASPQHGSGFKGKGERFPRSLKDESSEYFGSQNSLVKPKDQWITYLFKSNDTRLLFSEFGHRYKRNIDPHKRRHWRRSSRNGDVPSVEFFPKPQPTIETEGFAWVTSYSRIALPVLEEYCQSTREFCPPGTPGPPGNPGNPGLKGEKGDKGDRGFIGNTGSRGPQGFSGITGPVGPKGEPGEPGIPGLDGRDGLPGEPGLDGVPGRDGADGLPGVDGIPGVPGMPGSPGFNGTDGAPGAQGPKGPPGKTGPTGLPGPRGRKGEPGTPGKPGTPGIQSWRINNKEVNKLLIPPAIVDIKNRSTLV…	0	12	13 (13)	39	8.99552e+06	0	19	17 (17)	56	3.27656e+07
Tt_038205-T1		dTDP-glucose 4,6-	355	40.3	F:GO:0003824; F:GO:0050662	F:catalytic activity; F:coenzyme binding			MGFIGQNLVEFLIRNDLVSKVRVVDKVPPQIAWLNKSRQELFEHPQVEFKSANLINAASCQSAFTDPEGEYDFVVNLAAETKSGQSDPVYKEGIVKLSIHCAKEAAKRKVKKYVELSSGYMHSNEKKPAKETSKLDPWTFMARFKLIIEEELANIPDLNYVVLRPAIVYGIGDKQGITPRLIVGAVYKYLGEMMKLLWTKDLKMNTVHVMDLCRAIWHVFTSGDNGEIYNVVDKGDTTQGKVSSIISEIFNINHDYWGSAMSTLAKTDMKSLVEEINDKHMGPWAELCNKDGISNTPLNPYLYEEFLYDRNLYLDGSKLEDTGFCYEVPNITLDRVKEILQDYAEMGLFPKSLLL	0	8	3 (3)	15	3.29133e+06	0	37	12 (12)	34	1.24851e+07
Tt_038516-T1		alpha-1-macroglobulin isoform X10	887	101.6	C:GO:0005576	C:extracellular region			KVFTIGKINRLDLQLFGTEGSVEFDHMRIGVKDNDNGNVIAETVVSFSKERDNRILLLNIPPKVVVKQPRLFVYGFYAHSRFNDFSYEKSIRLEEEKIIIFIQTDKPIYKPGETVKVRVLPTTHDLKLLPRTTIGHFQIENPNGIVLGIWPTLSFVEGIAQFELDLPDEPTYGFWHIKGNIDNVQISWAFEVKEYVLPKFEVKIIPPPYLLSDAEFITWEICANYTYGQPVEGTIVIETSVVKYNWEKKPVPVVHHSGPIVGCFTFTVNSSAIGFNETRLRYRPVTITAEVTEKGTDIKMNASRSISRISYPFTIHYVQPPTTTKSYLKPGLPFYGELKVQKPDGSPAPHEPIEICMYTRREVWNIERLLLEKSKTCKSFTSDQVGIIQFTVPPQTPDV…	0.034	1	1 (1)	1	472752	0	50	42 (42)	393	1.21985e+09
Tt_038518-T1		pregnancy zone -like	224	24.9	F:GO:0004866; C:GO:0005615; P:GO:0010951	F:endopeptidase inhibitor activity; C:extracellular space; P:negative regulation of endopeptidase activity			MKEVKWRKTFPLLFVFFVFTQVVYSKSGFILTAPKSLIPGKSNILNLHLFDINTNGFLRIGVKDQNDGNVVAETEVSFSKDKPSNSIQLTIPSGTEVKQPKLYVNGSYSSPNSNDFFFEKAINVNKDNLLVFVQTDKPLYKPGQIVKVRVLPTTPDLKLVPKETVGSLQIENPHGIVLGYWPMLSFAKEGVCGIFPENSVETVIVQIFKSCPLIKSILALGLKE	0	64	12 (9)	99	5.3661e+07	0	57	9 (8)	118	1.8618e+08
Tt_038522-T1	A2M	pregnancy zone -like	329	36.3	F:GO:0004866; C:GO:0005615; P:GO:0010951	F:endopeptidase inhibitor activity; C:extracellular space; P:negative regulation of endopeptidase activity			MHHLNYGAEFNNSLAVVIQEDFAVTEINIPVSFSSPTIGAGLRGPASHPSSSARKKTKKPVVEIRTYFPETWLWELQYIGTTGKLSLKRNIPHTITEWVGSAICISGETGLGVSEAATVKGFQPFFVSFTLPYSVIRGEKVPIIVTVFNYLSQCLPIKLSLEQSDKFEIQSDTNSYITCDTVIALQALAKFAKIIYKDELNLEIGVESSGFEKKFMLTKDNSILMQTFRLPTVPSPVDFEATGSGCGLVQTSIRYNVNTPPLSVFFHLDVTSKRGLYRDCNNARIATCVRYNGKGGVSNMAVLEMKMVSGWIPDKSSIENVRYVCSVAF	0	9	2 (1)	6	1.25395e+06	0	60	14 (11)	121	3.02281e+08
Tt_038523-T1	A2ML1	pregnancy zone -like	977	110.6	F:GO:0004866; C:GO:0005615; P:GO:0010951	F:endopeptidase inhibitor activity; C:extracellular space; P:negative regulation of endopeptidase activity			MVLRIEEISAEIAKDLERLAQVYYLDVSYEMMNLLVHNQFKDSLKDEDVKLVTHLVKVRVLPTTPDLKLVPKETVGSFQIENPDGIVLGYWPMLSFADVLPKFEVNITPPSYLLSNADSITWKICAQYTYGQPVEGTFEAKTNVVQYHWEKEGVPVIHKEGLIDGCIDVTVSSSDIGFNESRLSYRAVNMFAEVTEKGTGNFASIEQEDLTGCPARHQPLVEPGIKMKATASIHRTFDPLNIMYLQPTSGERYLKPGLPFYGKFELALPDEPTYGMWRIKGNIENTEIYENFEVKEYGKMVLHRRLEEVHCDPNRAHRVYNKLGGHDYYWPRQATPDYEYCQNYKFKQAEGQQKVFISPGFTSTNYLDSITAFDEAGLVVISDMQLETRPYQNGKFTAT…	0	27	24 (20)	173	7.90644e+07	0	45	37 (33)	278	7.85968e+08
Tt_038524-T1	MTHFS	5-formyltetrahydrofolate cyclo-ligase-like	203	23.1					MNSAASTALRAAKEALRVEVRKKLLSMSKDEKIRQTKLVTEKLLNYERFKNSRRISLYLSTEHEVQTHGILEKILNMEKECFVPKYDPNSQHMYMVKLHSTDDLSKLSVINWSNSETAEDNILDDALVAGGLDLMVIPGLAFDKRGGRIGTGHGYYDAYIDRCLHDPHGRPYLIGLAFQEQILHSIPMDEHDIVTDDVLYADK	0	12	2 (2)	3	273675	0	16	3 (2)	4	689193
Tt_038531-T1	RPS6	40S ribosomal S6-like	427	50	F:GO:0003735; C:GO:0005840; P:GO:0006412	F:structural constituent of ribosome; C:ribosome; P:translation			MKLNIAYPVTGCQKLIEFDDERKVRIFYEKRMGQEVEADALGDEWKGYVVRISGGNDKQGFPMKQGVLTAGRVRLLLSKGHSCYRPRRTGERKRKSVRGCIVDSNLSVISLVVVKKGEQDIPGLTDTTIPRRLGPKRASKIRKLFNLSKEDDVRQYVIRKPLPQKEGKKLRHKAPKIQRLVTPQVLQRKRHRIALRRKRAQKRKDEASDYARLLAHRAKEAKEKKQMELRRRRSASQRESLSTGKVTVSIDYETQWENMNIEDNLFSLTKSSDELSHNEMGEYDMDNSEINKDYKWDTDHSHHFHASYDHHFGHDMHSKEENSSNEPWRNEMDKHDTHESTYRLGKQYNEREPKTSNSDENNNKLNHDHDNLHDFNQDSHHAHDDDGHKYHEHHEEHEN…	0	11	5 (5)	21	5.69276e+06	0	11	4 (4)	8	1.76325e+06
Tt_038686-T1	Mlc-c	myosin-2 essential light chain-like	147	16.4	F:GO:0005509; F:GO:0032440; P:GO:0055114	F:calcium ion binding; F:2-alkenal reductase [NAD(P)+] activity; P:oxidation-reduction process	EC:1.3.1.74	2-alkenal reductase (NAD(P)(+))	MAGFTEDQIADFQDAFSLFDNRGDGKISISQLGDALRAMGQNPTEADVKKCSRQLKPDERISFEVFLPMMQAVSKNRSTDTAEDFIEGLRHFDKDGNGYIGSAELRHLLTTLGEKLTDDEVEQLLAGQEDSQGNVHYEDFVRMVMNG	0	35	5 (5)	33	2.92648e+07	0	71	8 (5)	33	4.14799e+07
Tt_039001-T1		ame: Full=Hemocyte -glutamine gamma-glutamyltransferase ame: Full=Hemocyte transglutaminase Short=TGase	356	39.9	F:GO:0003810; C:GO:0016020; P:GO:0018149; F:GO:0046872	F:protein-glutamine gamma-glutamyltransferase activity; C:membrane; P:peptide cross-linking; F:metal ion binding	EC:2.3.2.13	Protein-glutamine gamma-glutamyltransferase	MARPDLPTGYGGWQAYDSTPQETSEGVYQTGPASVLAVQRGEIGYMFDSPFVFSEVNADVVHWQQDDSSETGYRKLKRDSYRVGRLLLTKKIGVDDDFGDADAEDITDQYKNKEGTDEERMSVLNAARSSGFNYAFNLPSPEKEDVYFNLLDIEKIKIGQPFHVTVNIENQSGETRTVSAVLSASSIYYTGITGRKIKRENGNFSLQPHQKEVLSIEVTPDEYLEKLVDYAMIKLYAIATVKETQQMWSEEDDFMVEKPNLELEIRGNLQVGTPFVLAISLTNPLKSVLDNYFFTIEAPGVTGAFRVTNRDIQPEEVAVHTVRLIPQKPGPRKIVATFSSRQLIQVVGSKQVEVLD	0	20	6 (6)	32	4.36119e+06	0	45	12 (12)	29	9.16066e+06
Tt_039005-T1		ame: Full=Hemocyte -glutamine gamma-glutamyltransferase ame: Full=Hemocyte transglutaminase Short=TGase	490	56.2	F:GO:0003810; C:GO:0016020; P:GO:0018149; F:GO:0046872	F:protein-glutamine gamma-glutamyltransferase activity; C:membrane; P:peptide cross-linking; F:metal ion binding	EC:2.3.2.13	Protein-glutamine gamma-glutamyltransferase	MYGFGRGNMFRNRSTRYRRRPRYRAENYHSYMLDLLENMNEEFGRNWWGTPESHQPDSGPSSLQVESVELYTRDNAREHNTFMYDLVDGTKPVLILRRGQPFSIAIRFKRNYNPQQDRLKLEIGFGQQPLITKGTLIMLPVSGSDTFTKDKTQWDVRLRQHDGAVITLEIQIPAAVAVGVWKMKIVSQLTSEEQPNVSAVTHECKNKTYILFNPWCKQDSVYMEDEQWRKEYVLSDVGKIFTGSFKQPVGRRWIFGQFTDSVLPACMLILERSGLDYTARSNPIKVVRAISAMVNNIDDEGVLEGRWQEPYDDGVAPWMWTGSSAILEKYLKTRGVPVKYGQCWVFAGVANTVSRALGIPSRTVTNYDSAHDTDDTLTIDKWFDKNGDKIEDATSDSIW…	0	4	1 (1)	1		0	58	18 (18)	30	9.2137e+06
Tt_039015-T1	RPL14	60S ribosomal L14-like	156	18.2	F:GO:0003723; F:GO:0003735; C:GO:0005840; P:GO:0006412	F:RNA binding; F:structural constituent of ribosome; C:ribosome; P:translation			MAFRHMVQIGRVARIAHGDNAGKLCVIVDVIDQNRALVDGPCTAVGRQGMPFKRLRLTKFRIKIPHSTSTKVVRKAWEKESITDKWKESSTAKKIDARKLRSKMNDFDRFKLYKAKQAVSVIQHYHEVMKTTHESLQWKPLICAYITLFYFYLRSF	0	14	3 (3)	6	384615	0.031	5	1 (1)	1	821096
Tt_039119-T1		Histone H2B	145	16.2	C:GO:0000786; F:GO:0003677; C:GO:0005634; F:GO:0046982	C:nucleosome; F:DNA binding; C:nucleus; F:protein heterodimerization activity			GFKVAVKQSRRASQELRDKYMPPQQASGKAVKKAGKAQKAVRAGDKKKRKKRRKESFSIYIYKVLKQVHPDTGISSKAMSIMNSFVNDIFERIAAEASRLAHYNKRSTITSREIQTAVRLLLPGELAKHAVSEGTKAVTKYTSSK	0	55	14 (3)	650	2.4116e+09	0	49	10 (3)	183	1.22918e+09
Tt_039286-T1		tyrosine- phosphatase 99A-	77	8.9	F:GO:0004721; F:GO:0004725; P:GO:0006470; P:GO:0016311; F:GO:0016787; F:GO:0016791; P:GO:0035335	F:phosphoprotein phosphatase activity; F:protein tyrosine phosphatase activity; P:protein dephosphorylation; P:dephosphorylation; F:hydrolase activity; F:phosphatase activity; P:peptidyl-tyrosine dephosphorylation			MGVFSRACKKGDFLDTGFLSKQTLCCKGKKISVKCCVSEKDDKNDYRTFIVKLAEEYSMEDYITKDYPLQVAENEYE	0	16	2 (2)	9	5.17569e+06	0	16	2 (2)	9	1.23369e+07
Tt_039323-T1		disulfide-isomerase A3-like isoform X1	488	55.9	F:GO:0003756; C:GO:0005623; P:GO:0045454	F:protein disulfide isomerase activity; C:cell; P:cell redox homeostasis	EC:5.3.4.1	Protein disulfide-isomerase	MRMKLIFLTVYFVASAVASDVLDLSGPDFEDRVKEHGTMLVEFFAPWCGHCKRLAPEYEKAATSLKDNDPPVPLAKVDCTSDDGKETCSKYGVSGYPTLKIFKEGEFSAEYSGPRQADGIVKYMKAQVGPSSKEVNTVADAENVLQKDEVIIFGFFKDDSKLKDVFQKLADKQREDYSFCHTSSQEVLDKYGYKDEIILFRPKKFHSKFEEKELKYEGSADSFKLETFIKDNYHGLAGHRTQENFMQFKSPLVVAYFNVDYEKNTKGTNYWRNRIMKVAEKFKNKLNFAVSSKNEFAGEMSEFDLTAKDDKPVFGVRDEKGQKFRMEDEYSPENLEKFLQNLIDGNLKPHTKSEPIPESNDGPVKVAVGENFNELVVENEKDVLVEFYAPWCGHCKKLA…	0	7	4 (4)	6	1.41365e+06	0	8	3 (3)	3	209904
Tt_039443-T1		techylectin-5A-like isoform X1	289	33.1	F:GO:0030246; P:GO:0098609	F:carbohydrate binding; P:cell-cell adhesion			MMTSVFIWFVYVVGTSSGSEFIRKQCEEKSITGIVESIDVLVSLAKENLKTKEKHLINQETDHTCSLSSPGPTDCAHILLNGHSTSGSYRIWPRSWMTTGSFYVYCDMTTDGGGWTVIQRRGNHGNPKDYFFKPWADYKVGFGDIKKEFWLGNDRIYALTNQGNYSIRFDLKDKEGNERFAIYREFWIENENNLYRLHVSNYTGDAGDGFSGHSGFSFSTKDKDNDIYETSCAQTFKGGWWYSKCHSSNLNGLYLNGEHESYADGVEWSAWKGQKYSLPDVEIKIRPLY	0	30	8 (6)	62	9.00641e+07	0	56	12 (4)	151	8.99866e+08
Tt_039608-T1		alanine--tRNA cytoplasmic	894	100.7	F:GO:0000049; F:GO:0004813; F:GO:0005524; C:GO:0005737; P:GO:0006419; F:GO:0008270	F:tRNA binding; F:alanine-tRNA ligase activity; F:ATP binding; C:cytoplasm; P:alanyl-tRNA aminoacylation; F:zinc ion binding	EC:6.1.1.7	Alanine--tRNA ligase	MRTILSWEKERNYCEHPATSGRTENEDNFISGKKKEIIVSILLHQEELRMRTILSWEKERNYCEHPATSGRTENEDNFILGKDKKCGNTNPKFATTYIMLHYSLVRKYHMVHGQSEVICYKFRSIHERGKMDTTLTSKEIRQMFMDFFGQKYKHLYVHSSSVIPHDDPTLLFTNAGMNQFKPIFLGVVDPNSDSAKYKRVVNTQKCIRAGGKHNDLDDVGKDVYHHTFFEMLGNWSFGDFFKREICNWSWELLTKVYKLPKERMYVTYFGGAPEYGLEPDLECRDIWKEVGLPDDRILPFGMKDNFWEMGETGPCGPCSEIHYDRIGGRDAKHLVNADVPDVLEIWNLVFIQFNRENDGTLKMLPKKHVDTGMGLERLVSVIQGKSSNYDTDLFVPIFE…	0	3	2 (2)	3		0	3	2 (2)	2	603926
Tt_039734-T1	Atp5a1	ATP synthase subunit mitochondrial-like	556	60.5	F:GO:0005524; P:GO:0015986; F:GO:0016887; F:GO:0043531; C:GO:0045261; F:GO:0046933	F:ATP binding; P:ATP synthesis coupled proton transport; F:ATPase activity; F:ADP binding; C:proton-transporting ATP synthase complex, catalytic core F(1); F:proton-transporting ATP synthase activity, rotational mechanism	EC:3.6.1.3; EC:3.6.1.15	Adenosinetriphosphatase; Nucleoside-triphosphate phosphatase	MALFSARLVTYVARQIPKHSTKVKISNSYLSTYLAGRNFSTTQYAAAGPGSAEVSSILEERILGHVPTANMEETGRVLSIGDGIARVYGLKNIQTEEMVEFSSGLKGMALNLEPDNVGIVVFGNDKLIKEGDIVKRTGAIVDVPVGTELLGRVVDALGNPIDGKGPVACTRRARVGLKAPGIIPRISVKEPMLTGIKAVDSLVPIGRGQRELIIGDRQTGKTAIAIDGIINQKRFNDGTDEKKKLYCFYVAIGQKRSTVAQIVKRLTDADAMKYTVIVSATASDAAPLQYLAPYSACAMGEYFRDNGMHALIIYDDLSKQAVAYRQMSLLLRRPPGREAYPGDVFYLHSRLLERAAKMNDQFGGGSLTALPVIETQAGDVSAYIPTNVISITDGQIFLE…	0	15	7 (7)	26	6.75163e+06	0	5	2 (2)	4	893199
Tt_039787-T1		heat shock 70 kDa 4-like	844	95.8	F:GO:0000166	F:nucleotide binding			MSVIGIDFGNENCYIAVARAGGIETIANEYSQRVTPSYVAFGEKNRDLGVSAKNKQVTNIKNTVFGFKRLIGRKLRDPAVQREMTYLPYDLCELSNGDIGVKVNYLQQQAVFTIPQVTAMLFTKLKEIAETALKIKVNDCVISVPIYFTDRERRAMLDAAQIAGLNVLRLMNEPTAVALNYGFYKTDLHEEKPNNVVFVDMGHSAIQVSACAFTKGKLKLLAASWDINVGGRDFDNILVRRFAEEFHTKYKINVVSSRKGIVRLLTESEKLKKQMSANPHELPLNIECFMEDIDVAAKMKRSTFEELAGDLLSRIEVTMREVLHEAKLKPSDLDDVGIIGGSTRIPAIKQLVQKVFGREPSTTLNQDEAVARGCVLQCAMLSPTFKVRDFSITDIQPYP…	0	5	3 (3)	9	2.9569e+06	0	7	5 (4)	8	517447
Tt_039806-T1	CLIPD3	clotting factor B	400	43.1	F:GO:0004252; C:GO:0005576; P:GO:0016485; P:GO:0042381	F:serine-type endopeptidase activity; C:extracellular region; P:protein processing; P:hemolymph coagulation	EC:3.4.21	Acting on peptide bonds (peptidases)	MTWICVITLFALASATLGNKVSRVGVLFPKTRNDNECTARGGLKGSCKSLIDCPSVLATLKDSFPVVCSWNGRFQPIVCCPDAIAPPPVTTTAVTVISTKEPKLPRLHISGCGKRKVKIDITTVGRSGSPILPPISTPQNSTGGRGIIAGGVEAKIGAWPWMAAVFVKNFGIGRFHCASSIISNKYILSAAHAFLIGGRKLTPTRLAVRVGGHYIKRGQEYPVKDVIIHPHYVEKENYNDIAIIELKEELNFTDLVNPICLPDPETVTDPLKDRIVTAAGWGDLDFSGPRSQVLREVSIPVVPVDKCDQAYEKLNTPSLKNGITNNFLCAGLEEGGKDACQGDSGGPLMLVNNTRWIVVGVVSFGHKCAEEGYPGVYSRVASYLDWIAKVTNSLDHAVTN	0	21	7 (7)	19	4.98374e+06	0	36	14 (14)	40	3.99242e+07
Tt_039814-T1		---NA---	80	8.7					MNADWRSIMLSECPINVRCKKNCVIEEDLNGCLKCNCNNLGGATFQRQHSDNSGSGVANEFPIAVFSFVLVSIFCGGNSC	0.042	18	1 (1)	1	338737	0.028	18	1 (1)	1	5.70975e+06
Tt_039844-T1	Pgk	phosphoglycerate kinase-like	303	32.3	F:GO:0004618; F:GO:0005524; P:GO:0006096	F:phosphoglycerate kinase activity; F:ATP binding; P:glycolytic process	EC:2.7.2.3	Phosphoglycerate kinase	MALNKLGIDEINLKGKRVLIRVDFNVPLKDGKITNNQRIVAALDTIKHALSQGAKSVVLMSHLGRPDGRRIEKYSLKPVSEELKMLLGREITFLSDCVGPEVEDACQDPPEGSVILLENLRFHVEEEGKGLDAEGQKIGNSLYDEEGAGIVGKLMEKAKQNCVQIHLPVDFVIADKFDEAAATGTATVDSGIPAGWMGLDCGDKSVAKFCEAVQRAKTIVWNGPVGVFEWENYAKGTKAVMDEVVAVTKKGVTTIIGGGDTATCCAKWKTEDKVSHVSTGGGASLELLEGKTLPGVAALSDPA	0	13	3 (3)	7	1.08816e+06	0	13	3 (3)	4	447425
Tt_039868-T1		calcyclin-binding -like isoform X2	220	25.5	F:GO:0005515	F:protein binding			MSKVEEFQADLEELKRLESVAVRKRVKEALSNEIRKVETFLKDLHGTSSTGTEVKANVARSQYCTVKIQNYAWDQSDKFVKLYVTLPNVQSLPSEQIRTNFSDKSVELQVIGLENKIQVLTIKNLTYPIKPQESYHKLKNDTVTVFLKKDSTKHWPYMTEIEKKVKDSRTPKYDEDTSDPGKSLMNLMKQMYDEGDDEMKRTIAKAWTEAREKQSSELDL	0	6	1 (1)	2	369795	0	6	1 (1)	1
Tt_039929-T1		chymotrypsinogen A-like	394	44.4	F:GO:0004252; P:GO:0006508	F:serine-type endopeptidase activity; P:proteolysis			MKFLALTVLLGISWARPQDDRLIWGSAESDVSRRTGNDNPEGPNPNKNYHGCLCVPFYLCKDDNIIIDGSGILDPRNKPPPTAEPRLNATLAPAEANGCGPFHVCCTLPETTTKTPFVPHCGFRNINGINKRILNTKENGLSQFGEWPWQAAVLKVEGKVNIFQCGAVLIDNLHLLTVAHCVYRFTSGNDYHLKVRLGEWDTQNTEEFYEHEDHDVGEIIIHPKYDDERKNLWDDIAILRLKSEVSLKPHIDTICLPNFQESFEDVTCVVTGWGKDAYKNGTYSNILREVIVPVIHNSQCEQLLKKTRLGRHFTLYEKFICAGGEKKKDSCKGDGGGPLVCWSQSGRYKLAGIVSWGINCGMESVPGVYVRVQNYIDWITSITNRPIQSYWPEL	0.003	4	1 (1)	1		0	4	1 (1)	2	431098
Tt_039995-T1		far upstream element-binding 1-like isoform X1	721	76.5					MSVVPPQSTVSGGFDTNSAFADALERARQIAAKINPGGGDTGTTGGTKRPLEDSMDLLSDGGSDPKKLATMKDPIGAQLAAIHQQRSMPGSNAVTVEEWKVPDKMVGLLIGRGGEQITRLQAESGCKIQMAADSGGTPDRACTLTGSRQSIEKAKDLMTQIINRGGPPPPYVDINQVPEGQVVIDMIIPAGKVGLIIGKGGETIRQLQERAAVKMVMIQDSPQQTGMDKPLRITGDPSKCEFAKQLVMDLLTEKEIENVNRGGGSYMGGGPLTNEYGSVPPGTQEILVPRQAVGVVIGKSGDMIRRIQQDSGGAKVQFQQGKDDGPGDRICLVSGNPEQAQRAANIIHDLIRSVLMRDQQNVGRGRGRGRGYDAGPGGPPFGPPGPGMGRGRPDGDMQE…	0	12	7 (3)	21	5.78835e+06	0	4	2 (2)	2	311622
Tt_040005-T2	TUBA1C	tubulin alpha-1C chain-like	449	49.9	F:GO:0003924; F:GO:0005200; F:GO:0005525; C:GO:0005737; C:GO:0005874; P:GO:0007010; P:GO:0007017	F:GTPase activity; F:structural constituent of cytoskeleton; F:GTP binding; C:cytoplasm; C:microtubule; P:cytoskeleton organization; P:microtubule-based process	EC:3.6.1.15	Nucleoside-triphosphate phosphatase	MRECISVHIGQAGVQIGNSCWELYCLEHGIQQDGNMPSDKAMGSDDSFNTFFSETGSGKHVPRAVFVDLEPTVVDEVRTGAYRALYHPEQLITGKEDAANNYARGHYTIGKEIVDLVLDRIRKLADACTGLQGFLIFHSFGGGTGSGFTSLLMERLSVDYGKKSKLEFSIYPAPQVSTAVVEPYNSILTTHTTLEHSDCAFMVDNEAIYDICRRNLDIERPTYVNLNRLISQIVSSITASLRFDGALNVDLTEFQTNLVPYPRIHFPLVTYSPVISAEKAYHEQLTVAEITNSCFEPANQMVKCDPRHGKYMACCMLYRGDVVPKDVNAAIAAIKTKRTIQFVDWCPTGFKVGINYQPPTVIPGGDLAKVPRAVCMLSNTTAIAEAWARLDHKFDLMYA…	0	10	3 (2)	11	602594	0	36	12 (3)	48	2.82892e+06
Tt_040011-T1	Hsc70-3	Endoplasmic reticulum chaperone	657	72.7	F:GO:0005524	F:ATP binding			MKLFARVVCVCLLVSALCTAKKEDDSKKDHVGTVIGIDLGTTYSCVGVFKNGRVEIIANDQGNRITPSYVAFTPDGERLIGDAAKNQLTTNPENTVFDAKRLIGREWSDVMVQKDIKLLPFKVIEKNNKPHVQVDTSKGTKVFAAEEISAMVLSKMKDTAEAYLGKKVTHAVVTVPAYFNDAQRQATKDAGVISGMTVMRIINEPTAAAIAYGLDKKEGEKNILVFDLGGGTFDVSLLTIDNGVFEVVATNGDTHLGGEDFDQRVMDHFIKLYKKKTGKDIRKDNRAVQKLRREVEKAKRTLSTAHQARIEIESFFEGEDFSETLTRAKFEELNMDLFRSTMKPVQKVLEDADLQKKDIDEIVLVGGSTRIPKIQQLVKEFFNGKEPTRGINPDEAVAY…	0	36	19 (17)	98	5.10056e+07	0	44	25 (22)	71	4.05734e+07
Tt_040154-T1	RPS3	40S ribosomal S3	236	26.2	F:GO:0003723; F:GO:0003735; P:GO:0006412; C:GO:0015935	F:RNA binding; F:structural constituent of ribosome; P:translation; C:small ribosomal subunit			MATTISKKRKFVADGVFKAELNEFLRRELAEDGYSGVEVRVTPTRTEIIILATRTQSVLGEKGRRIRELTSVVQKRFNFTEGSVELYAEKVAARGLCAIAQCESLRYKLIGGLAVRRACYGVLRFIMESEARGCEVVVSGKLRGQRAKSMKFVDGLMIHSGEPTNDYVETAVRHVLLRQGVLGIKVKIMLPCDRNGKIGPKRPLPDNVTIVSPKEETVPQQPYSEQKGEKPTMPAV	0	39	7 (7)	23	2.2716e+06	0	14	3 (3)	5	1.23046e+06
Tt_040162-T1	frem3	FRAS1-related extracellular matrix 2-like	2661	298.8					MLWSETFVSFFLLSVSTHGQQPDAPLTGQDIIEVNSGIEVAFGRSVFIDPTKDLKIKVRDGDRCTVTVIQNDPLSQRPGKLVPSHFPCQFGVQEVQYFHFGARTPPQDRVKLILRYDTVDDTIIVPFTIHVEVLFVQLEVVTKNMPIVVENLLGISAPFDDKALQFSYDRNDQKCKVTVLGKDSGLPRYGKILNHTTNGVMQDCDSFLKADIRYKHTYVYNSPNQDHVPMVVEVTDPDGNLMKQEYFHLTVKIKDGHPNSPPQADFSSMLLLDINQFIMTAITSRILSAQDLETPPDNLIFNITSPLGYGEGHIVSTDDQNVPITSFYQKDLNDLKIAYRPPASDSNIKRTFDIKMEVIDAEGLSSEPFSLMIVVHPKNTLAPLATRNSGLMLFEGQSR…	0	2	4 (3)	7	526338	0	6	9 (9)	15	309570
Tt_040168-T1		thymosin beta-like isoform X2	159	17.9					MSSSKKELPKVSPAIKDELVHFDSTKMKPTKTEEKVVLPTKEDVQKEKVHNSLLQNVEGFQRSKLNPTEPVEKVRLPSAEDVELEKIHNSLLQDVEGFERSLLSPTHPHEKMHLPSAEDVKQEKIHQSLVTGVEQFDKTSLHHAKTTEKSVLPNSQGSV	0	42	5 (1)	16		0	58	8 (1)	15	756679
Tt_040168-T2		thymosin beta-like isoform X1	226	25.6					MCRGLVMIWVVVLLLVESSCIQFTHLIGAYVFGCAEAGGGRQMEGNKYAHIEGSTNRESYFVKEDVQKEKVHNSLLQNVEGFQRSKLNPTEPVEKVRLPSAEDVELEKIHNSLLQDVEGFERSLLSPTHPHEKMHLPSAEDVKQEKIHQSLVTGVEQFDKTSLHHAKTTEKSVLPNSQEIEKEKGQQQLLEGIKSYDTSQLKNTTTNFKNPLPTKDEIEQERKSSK	0	27	5 (1)	16	1.26953e+06	0	50	11 (4)	21	1.24828e+07
Tt_040216-T1		high mobility group B1	193	22.9	F:GO:0003677; C:GO:0005634	F:DNA binding; C:nucleus			MGKGEKPRGRMSAYAFFVQTCREEHRKKHPDENVVFAEFSRKCAERWKTMSEKEKQRFQQMAEKDKKRYESEMANYKPPKGEKKGRKRKRTKDPNAPKRALSAFFWFCNDERPKVKEMMPSSSVGDIAKELGKRWNEVSEDLKSKYEGLAAKDKARYEKVYIIYSPWCTYCITVRASILVISKVMFFSSYYRM	0	33	7 (7)	23	5.19319e+06	0	37	11 (11)	32	1.31497e+07
Tt_040250-T1		stress-induced-phospho 1-like	300	34.2					MSGQVDQALKAKEAGNEAYKKKDFEKALEHYDKAIELNPSDMTFLLNKAAVFYEQKDYDKCIEECEKAIDVGREYRADFKIIAKAYARMGGAYSKKGDLYNAKTYYQKSLTEHRLPATLTKLSEVEKIIKENERKAYIDPDKALEEKNKGNECFQKGDYPAAVKHYTEGLRRNPEDPKLRSNRAACYQKLAEFHLALKDCDECIKLDPSFVKGYIRKGMALMAMKEPSKAATAFQKAIELDPNSQEALDGYRKCLLASDDNPEEVRKRAMADPEVQKILGDPAMRIILEQMQSDPKALQE	0	38	12 (12)	76	3.36942e+07	0	35	10 (10)	27	1.24054e+07
Tt_040254-T1		ubiquitin-conjugating enzyme E2 N	151	17	F:GO:0005524; C:GO:0005634; P:GO:0006301; F:GO:0016874; F:GO:0061631; P:GO:0070534	F:ATP binding; C:nucleus; P:postreplication repair; F:ligase activity; F:ubiquitin conjugating enzyme activity; P:protein K63-linked ubiquitination			MANLPRRIIKETQRLMAEPVPGISATPDESNARYFHVVVAGPEGSPFEGGVFKLELFLPEEYPMSAPKVRFMTKIYHPNIDKLGRICLDILKDKWSPALQIRTVLLSIQALLSAPNPDDPLANDVAEQWKINEAEAIRTAREWTRLYAQSA	0	13	1 (1)	2	107399	0	38	5 (5)	11	5.28322e+06
Tt_040322-T1		subfamily B member	358	40.7	P:GO:0006457; F:GO:0051082	P:protein folding; F:unfolded protein binding			MMASTVYSICVFLFMCLFVLQALAGRDFYKILGVPRSASLNQIKKAYRKLAKELHPDRNKDDPKTQEKFQDLGAAYEVLSDPDKRKTYDKFGEEGLKNDAFGGSDPFASFFGDFGFFTGGHRPEEREIPRGADVVMDLWVTLEELYSGNFVEVIRNKPVMKPASGTRKCNCRQEMVTRQLGPGRFQMTQQTVCDECPNIKLVNEEKLLEIEVEPGMHDGQEQKFIAEGEPHIDGDPGDLKVRIKTSPHAIFERRGDDLYTNITVSLTDALCGFEMDITHLDGHKVHILRDKITWPGARLRKKNEGMPNYENNNVFGTLYITFDVDFPKGQLSKENIEVIKKIFQEDSKTKVYNGLQGF	0	8	3 (3)	10	1.20794e+06	0	5	1 (1)	2	287880
Tt_040327-T1	CNDP2	cytosolic non-specific dipeptidase-like	478	53.2	P:GO:0006508; F:GO:0008237; F:GO:0016805; F:GO:0046872	P:proteolysis; F:metallopeptidase activity; F:dipeptidase activity; F:metal ion binding	EC:3.4.13	Acting on peptide bonds (peptidases)	MESTVDLSTIFSYIDEHQQQYIDALKKAVAIRSVSAWPETREEIIKMVKWVAELLEAEGATCELADVGTQTFPDGKAIPCPPVILGQLGNDPQKKTICIYGHLDVQPAAKEDGWDTEPFELTEKDGKLYGRGATDDKGPVLAWIHAIQAYHKTGCQLPVNLKFCFEGMEESGSEGLDDLVFSRKDTFFKDVDYVCISDNYWLGKKKPCITYGLRGICYFFITVECSNKDLHSGVFGGTVYEGMADLIALMNSLVDVNGNILVPGIMDDVLPLSEEEENLYEKIDFDVEDYKCDIGCQNIIQKSNRIQALMHRWRFPSLSLHGIEGAFSGPGAKTVIPRKVVGKFSIRIVPNQIPEKVEKCVVDYLNKKFEERGSPNKMNACMFHGGKPWMSNPSHPHYQ…	0	6	2 (2)	7	3.55782e+06	0	17	6 (6)	12	1.06599e+06
Tt_040418-T1		Endoplasmin, partial	796	91.8	F:GO:0005524; P:GO:0006457; F:GO:0051082	F:ATP binding; P:protein folding; F:unfolded protein binding			MKWILLFVGLLLMSGLCLADDATAEEVEMNVDQDIGSSREGSRTDDEVVQREEEAIKLDGLNVAQMKELREKAEKFAFQAEVNRMMKLIINSLYRNKEIFLRELISNASDALDKIRLLSLTENEALSATEELSIKIKSDKENNILHVTDTGIGMTHDDLVNNLGTIAKSGTSEFLQKIGEAESTVELNDLIGQFGVGFYSTFLVADRVVVTTKHNDDKQYIWESDSGSFSIVEDPRGDTLKRGTTVSLHLKEEARDFLEEDTLKELIKKYSQFINFNIYLWTSKTETVEEPVEEDEEEVIKEKPDEEIEEDGKVEEEKEDKPKTKKVEKTTWDWELMNSAKPIWQRKPADITEDEYKEFYKSITKDTSEPLAKTHFIAEGEVTFKSVLYIPSSQPTETF…	0	23	19 (19)	95	3.62101e+07	0	58	45 (45)	173	1.34774e+08
Tt_040454-T1	RpL27A	60S ribosomal L27a	148	16.8	F:GO:0003735; P:GO:0006412; C:GO:0022625	F:structural constituent of ribosome; P:translation; C:cytosolic large ribosomal subunit			MSTNKRKTRKLRGHVSHGHGRVGKARKHPGGRGNAGGMHHHRINFDKYHPGYFGKVGMRNFHLRKSQYYKPIINLDKLWTLVTEQTRETYKNHPEGKAPVIDVVRAGYFKVLGKGRLPKQPVIVKAKFFSRLAEEKIKAVGGCCVLTA	0	19	3 (3)	5	1.72767e+06	0.012	7	1 (1)	2	831806
Tt_040505-T1		40S ribosomal S10	331	38.5	C:GO:0005840	C:ribosome			MAEILEKLFVMTILVKSKLIEKIDADDSLNAKSFVNVNKYVLTETDEIELKFNEFIKVINYANRKHKTLLIEKLRSQMNMDKRWWLQLRIKEWAYRAEAQSLTLIRGPQAMTINVFPQRQYAEINGNFIFEHAKFFPFKIIIESRRLSGKFFGDGYDPTFSNASRDVGIYPTKTIMLIPKKNRVAIYEYLFKEGVLVAKKDFHAPKHPELETVPNLQVIKALQSLKSRGYVKEQFAWQHYYWYLTNEGIQYLRDFLHLPPEIVPSTLKRQPRPETARQRPKGPAEQTPRPQADRESYRRGPGAPDKKGDVGVGADSKMEFRGGFGRGRAPQ	0	19	8 (8)	30	1.4327e+07	0	8	2 (2)	3	5.2032e+06
Tt_040531-T1	fz	Frizzled-7-A-like protein, partial	229	25.6	F:GO:0004888; P:GO:0007166	F:transmembrane signaling receptor activity; P:cell surface receptor signaling pathway			MVHKLLLVILIFSLTFFQSRQKQVLEARQMWIQAKVTVYNESIVSVDNEIVKSLKNKVAGDDDKTTTEPALVEGKNKVSINSGVNASENNGCSLSDFQDTSHHTCEPITVPMCSDFTYNYTLLPNYFGHQNQEEAAMEIHQFFPLVKVQCSPDLQLFLCTLYVPMCTGLKKCIPPCKSMCESARNGCEPLMTKYGFSWPKWLDCEKFTDAELCVANSAGRLKVGPVPLS	0	12	3 (3)	7	1.49598e+06	0	9	2 (2)	8	2.89975e+06
Tt_040632-T1	XRCC6	X-ray repair cross-complementing 5-like	600	68.8	F:GO:0003677; P:GO:0006259; P:GO:0006974; F:GO:0016787; C:GO:0043229	F:DNA binding; P:DNA metabolic process; P:cellular response to DNA damage stimulus; F:hydrolase activity; C:intracellular organelle			MDGNWRDRDEDEEEENGALNYIQTGRDSLIFLIDVTESMFVKSEETGNIPFYLSIKCLKTTLENKIISSEKDLIGVIFFGSEKDKNPNEFKHIYVFQDLDQPGRERILEVEELFGDDIKTFKDKFGHSNNFSLSDALWTCSTVFSNCKMNLSHKRVLLFTNTDNPHAENKQLQQQAKIRAKDLFDLGIEIDILHIKKPGVSFDITEFYQDIEFLPEDEQYEKLPASEKIEELLARVRIKDHKKRSLGHLTLNLGKHIELAVNVYNLVRATTKPYAVKLAKSNNAELRNMTKTYAEDNGEILMPSDMKKYQEYGGQKIFMEIDDINQIKHFDDPGLMLIGFKPKSSLKFHHHIRPGQFIYPDEKSISGSTRLFSSLLQCCLEREKVIICRYIPRKNTPPR…	0	5	3 (3)	6	741408	0	4	2 (2)	3	1.06986e+06
Tt_040634-T1	FIBCD1	techylectin-5B-like isoform X3	303	34.5					MNSCRNKKVMFHLICIWLTGILLTVSVEGKTSDVSRYDLKDILDALPTTVWGMVNLVKEKLKDILPPPENKTSANTTMFTDCADLRHEGYAESNRVYTIWPRFLNEPIKVVCDMDTEGGGWTIIQRRGYYDDKPQDFNQSWYHYSVGFGSLNEDFWLGNDNIYALTNHKDVELRVDLEDFSGKTVYAKFSHFLVMSERRKYQMFLGAYSGNAGDSLKYHNGSRFSTKDQDNDENSKSCSTGYGGHGGWWFKSCVQSTLNGIYHKTAKATKSWVGIAWNTFGGSAASLKRTEMKIRPSYFVIPH	0	16	4 (4)	12	5.76471e+06	0	50	15 (15)	130	2.23574e+08
Tt_040692-T1		natterin-4-like	160	17.3	F:GO:0016740	F:transferase activity			MSTCCGSTNYRAVAEWVNAARGSVPQNAVQGGYDGVDIIYIGRAHHQGEVVPGKVVPSHGCCYVPWGGVEHSHKEYQVLVNRNGSILEWHYTSNGLTPTGAIQGGRSNTGEPIFIGRVDHNGTKTVGKVHPSHGVLYISYDGKEISHSNYEVLVAKYLQL	0	28	3 (3)	8	826941	0	58	6 (6)	18	9.17817e+06
Tt_040717-T1	Rab7	ras-related Rab-7a-like	205	23.2					MTSRKKVLLKVIILGDSGVGKTSLMNQYVNRKFSNQYKATIGADFLTKELLVEDRLVTMQIWDTAGQERFQSLGVAFYRGADCCVLVFDVTAPNSFKSLDSWRDEFLIQASPRNPENFPFVVIGNKVDLENRTVSTKRAQGWCQMKNNIPYFETSAKEATNVEQAFQTIAKDALGQESQVDLYNEFPDQIKLTSHQQPQSEGCVC	0	12	2 (2)	2		0	12	2 (1)	3	702927
Tt_040931-T1		PI-PLC X domain-containing 2-like isoform X2	440	50.8					MKIQSFLSVSKRPLSFLLWWLSSFLPLHYLNADSECLPSREKDVHVFLTVSSLASVLPSSKLIERQLELNWVGGSRNTGDIVALYNHDPENSLESPVLTINPLLYVGGYYKTNVQFPRVHFTANNLTSDCLGFWVAYARQGEILGCSCLHARPTWMKDNGRKIRNIPLVQLMIPGTHNSGSYQQYKGLDSETVFLRYLYNQEERIFNQLAYGIRFLDLRVGFYPHTKEKFWINHRLFSVNNTLVTVLQDVANFLQVTEEVVLLDFHNFPTGFLYRPEIHRWLIRLVSEHLGPYMAPRHVGPNVTLGTLWNIGKRVLVSYNSHHYISSNLLWPPVTHIWGNKQIVRDLKIFFDGALRQSNYSTLSSAMAELTPTIATFFTEPRKGLRGLAHDVNRQITHW…	0	19	6 (6)	14	2.53599e+06	0	36	13 (13)	29	2.49499e+07
Tt_040993-T1		endoplasmic reticulum resident 44-	432	50.2					MDLFYFLFIIINLFSILTSIRGEAVKLMSANFDSQVFNHELVFLNFYADWCKFSQILAPVFNEAADRIMKEVQEPRKILFGMVDCDTETNIAARFHITKYPTLKLLRNGKVMKREYRGQRSVDAITEYIRDLLKDPIIEIKEQKDFDNIHESKRTVLGYLSSKAFPRYEVFRKVAMDLRDDCEFFVITGDLAKSGPNNEEKIVFKPARSKLNENDEIYPGSLLSYEELGVWVTDRCIPLVREITFENAEELTEEGLPFLILFHNPEDRESVKVFTREVSTHLMGDKSSVNFLTADGQKFSHPLHHLGKSQKDLPLIAIDSFRHMYLFPDFNDLYVSGKLKQFVEDLYSGKLHREFHYGPETTTKSQSDAPSPNVQFVKFIGCSEDKLVRVCYLENYTRN…	0.002	3	1 (1)	2	176468	0	3	1 (1)	1	529112
Tt_041017-T1	LanB1	laminin subunit beta-1-like isoform X1	2030	226.3					MAVGSMQLRYFLVGCAVLAALIPEFASKQQTGRDKYTHRSYQRNNEKFIIDDETPATTAVGDAKDVLSGTPPVYQYSYFDRLKHATSTKSPFHWSHSNTRTRHGRSKKVSVSGLFRRTDSSGSSNIDQLLPDAISKGFTDGHTHGKTHVNRYVFHNRNVSSEKDLSENSRKEYRKEEKTSSVYHRSGSSFGISRNNTDYERFNGSSRVSRIYHKHSFGGRIMGLDSSSSSRISSHSTHSSIGPSRFPNTSSVSRNSDFHSVKYDERRRDESHENLHPFDYQLLVTTRGTLSPHACDESSCYPATGNLLIGRVDQLKATSTCGLEHIERYCIVSHLKEKKKCFYCDSRPERRNNPRLYHGIENVVSRIGRKLTEWWQAENGVQNVTIQLDLEAEFHFTHI…	0	4	8 (5)	20	2.41838e+06	0	6	10 (3)	27	402348
Tt_041201-T1		Histone orphon	209	22.4	C:GO:0000786; F:GO:0003677; C:GO:0005634; P:GO:0006334	C:nucleosome; F:DNA binding; C:nucleus; P:nucleosome assembly			MADATAPTTAPSPKKVSKQKAKKPRTAPVHPKVSEMVITAITSLKERGGSSLQAIKKYIAANYKLDVERMNPFIKKYLRSAVNSGILTQTKGKGATGSFKLSAQKSKEKVVKKPKKKEGTTAKKSKAPSKPKKVAEKKAKTAAKKPKAKAKPKKVAKPAKKPAASKPKAPKKAKAAPKKAASKKLVKCTEPFTNVMEKSIPYAHAYTAE	0	43	14 (12)	194	1.11785e+09	0	26	9 (7)	85	3.25948e+08
Tt_041204-T1		histone H3	194	22.2	P:GO:0000183; C:GO:0000786; F:GO:0003677; C:GO:0005576; C:GO:0005654; P:GO:0006334; P:GO:0007596; P:GO:0038111; P:GO:0044267; P:GO:0045652; F:GO:0046982; P:GO:0060964	P:chromatin silencing at rDNA; C:nucleosome; F:DNA binding; C:extracellular region; C:nucleoplasm; P:nucleosome assembly; P:blood coagulation; P:interleukin-7-mediated signaling pathway; P:cellular protein metabolic process; P:regulation of megakaryocyte differentiation; F:protein heterodimerization activity; P:regulation of gene silencing by miRNA			MASRLCVLSNDWWNTTNEKLSRTESAKFEKINKKRLRTMIILSTEVEECSRIHGQNEIMARTKQTARKSTGGKAPRKQLATKAARKSAPATGGVKKPHRYRPGTVALREIRRYQKSTELLIRKLPFQRLVREIAQDFKTDLRFQSSAVMALQEASEAYLVGLFEDTNLCAIHAKRVTIMPKDIQLARRIRGERA	0	46	11 (4)	175	1.003e+09	0	36	6 (2)	74	2.28407e+08
Tt_041205-T1		Histone H4	171	19.2	C:GO:0000786; F:GO:0003677; C:GO:0005634; P:GO:0006352; F:GO:0046982	C:nucleosome; F:DNA binding; C:nucleus; P:DNA-templated transcription, initiation; F:protein heterodimerization activity			MSGRGKGGKGLGKGGAKRHRKVLRDNIQGITKPAIRRLARRGGVKRISGLIYEETRGVLKVFLENVIRDAVTYTEHAKRKTVTAMDVVYALKRQGRTLYGFGGPPPPNEEIPHFRTSYNSLKYTYKYTNSLLANSFSHNTISTSLTRKRTQNFVNKHSRMIRSDARNGDPS	0	41	17 (17)	1230	4.44001e+09	0	33	11 (11)	382	1.936e+09
Tt_041465-T1		fructose-1,6-bisphosphatase 1-like isoform X2	336	36.5					MSASQAIDTNAMTLIRYVLAEQKKFPGATGDLTALLNSILTACKAVSSAVRKAGIAKIFGIAGQTNVQGEEVKKLDVLANDLFINMLKSSFTTCLLVSEENEQSIEVETDKRGKYIVCFDPLDGSSNIDCLVSIGSIFAIYRKTSTGPPVEQDGLQSGRNIVAAGYALYGSATMVVLSTGNGVNGFMLDPAIGEFILTDPGMTVKPKGKIYSINEGYASVWDKAVTEYVRRKKYPQRGKPYGARYIGSMVADVHRTLKYGGIFMYPATKDSPNGKLRLLYECNPMAYIIEQAGGVASTGKIPVLDVVPEKIHQRSPIFLGSREDVEEILDLYKQYE	0	10	3 (3)	5	665884	0	33	11 (11)	23	1.06863e+07
Tt_041616-T1	MACROD2	MACRO domain-containing	308	34.6					MISPRVIGKFSYLCSKLGNFRCFSSQICIRYRVPNVLRICGCKKETLDRPSVTFATTERFYFANTKLLRMMASSEGEDLPESEKKKYLKMPLNEKRLGYKCSKYITLDDIPSWPDYCRNKHLQKDSDTSTDPIHHDLNKKISIFIGDITALEIDAIVNAANKSLRGGGGVDGAIHQAAGPSLLEECITLGGCNTGDAKITGGYKLPAKYVIHTVGPIGENPKKLRSCYLRSLDQLLENKLESVAFPCISTGIYGYPNDKAAKVALKAVREWLETEDNASKVQRIIFCLFLEKDVKIYEELMQKYFPCT	0.002	5	1 (1)	2	425235	0	8	2 (2)	4	1.29312e+06
Tt_041625-T1	GPX1	glutathione peroxidase 2-like isoform X1	139	16	F:GO:0004601; P:GO:0050896	F:peroxidase activity; P:response to stimulus	EC:1.11.1.7	Peroxidase	MNELISKYGDKLVVLGFPCNQFGHQENGKGEEIMNTLRYVRPGNGFQTKITLFEKIDVNGENSHPVFQFLRQSLPTPHDDPLSFVKNPQCIIWSPVTRGDICWNFEKFLIDKNGQPFRRYGPRYPTINLDSDISELISK	0	34	3 (3)	10	3.63399e+06	0	78	9 (9)	24	3.14695e+07
Tt_041628-T1		alpha-actinin isoform X2	889	102.7					MSEPYGDGYMEPEEEWEREGLLDPAWEKQQRKTFTAWCNSHLRKAGTQIENIEEDFRNGLKLMLLLEVISGETLPRPDKGKMRFHKIANVNKALDFIASKGVKLVSIGAEEIVDGNVKMTLGLIWTIILRFAIQDISVEEMTAKEGLLLWCQRKTAPYRNVNVQNFHLSWKDGLAFCALIHRHRPDLLDYSKLSKESPLENLNLAFDVAEKHLNIPKMLDSDDLNSTAMPDERAVMTYISSYYHTFSGAQQAETASNRICKVLKVNQENERLMDEYERLVSDLLDWINKTTPWLENRTADNTLNGVQKKLEEFRNYRRVGKPPRVEEKAKLETNFNTLQTKLRLSNRPAYLPSEGKMVSDIANTWKILETAEKGFEEWLLSEMMRLERLDHLAQKFKHK…	0.003	1	1 (1)	1		0	15	11 (3)	15	709952
Tt_041723-T2	UGP	UTP--glucose-1-phosphate uridylyltransferase-like isoform X2	509	57.4	F:GO:0003983; P:GO:0006011	F:UTP:glucose-1-phosphate uridylyltransferase activity; P:UDP-glucose metabolic process	EC:2.7.7.64; EC:2.7.7.9	UTP-monosaccharide-1-phosphate uridylyltransferase; UTP--glucose-1-phosphate uridylyltransferase	MGTYQERRVMLGHRRTPSDSTEFKALTKRDAQVQLAQELDKLLFTMPSIQREKVEVEFRGFQKLFLKYLQGVGSSVEWEKLEKPPGDSVREYDSLSKPSHEKIKPLLDKLVVVKLNGGLGTSMGCTGPKSVIPVRSDLTFLDLTVQQIEHLNKTYHVDIPLVLMNSFNTDEDTQKVLKKYRGFKIKIYTFMQSRYPRINRESMLPVPTSIENGDSEAWYPPGHGDFYESFQNSGLLEEFLQRGKEVCFVSNIDNLGATVDLNILSTMITDTDGPKPEFVMEVTDKTIADVKGGTLTQYEGKLRLLEIAQVPKEKVDEFKSVKKFKIFNTNNLWMRLQSIQNLVEEGGLDMEVIVNDKHLDSGLNVIQLETAAGAAMKDFTNVMGINVPRQRFLPVKKTS…	0	5	2 (2)	2		0	10	3 (3)	7	1.83509e+06
Tt_041764-T1	ARG2	Arginase- mitochondrial	378	41.2	F:GO:0016787; P:GO:0044237; P:GO:0044281; P:GO:1901564	F:hydrolase activity; P:cellular metabolic process; P:small molecule metabolic process; P:organonitrogen compound metabolic process			MLMATRAINILRYLCRKCYLHTQRSNFLHAGSKAIFTNSNITELEWKNPAFSTITSSLNIGIIGAPLSKGQRKSGVEKGPLAIRDGGLLEKMQGLGLNVKDLGDVEITEVPDESVQQGKAIHSPTVGLVAKKVSEKVSKALRDNYICLTLGGDHSLGLATIHGHSCVYPDLSVLWIDAHADINTVLTSPTGNLHGMPCSFVLHGLEDHKIPLSGLDWLKPCLHPEHLAYIGLRDLDPFERLLVNKLGIPYFSMSDIDRLGIHEVVRKALEAINPRKDRSLHVSFDIDALDKLLVPSTGTPVIGGLTVREALCIAEEVAKTGLLKGLDLVEVNPLLGTKDEVEQTVAIAIQVILAFFGQERLGSMTRHTLSKLDLPVVK	0	5	1 (1)	1		0	7	2 (2)	2	296969
Tt_041792-T1		techylectin-5B isoform	312	35.7	F:GO:0030246; P:GO:0098609	F:carbohydrate binding; P:cell-cell adhesion			MKYAMILKKTILFSNILVFCTGSVQHHHTTCTDVGALEGIVDSLSELNKLAKEKIANIEGTICSTENNDRKLHFFAEEDANCKNLPQEQDCASFYNKGSRLSRVYKIWPTFLNHPISVFCDMDTAGGGWTVIQRRGDFKNNIEVFYQPWDLYKKGFGNLSAEFWLGNDAIFALTNQNNMLLRIELEDFDGSKRYAEYLEFVVRSEVNKYNMTFDSYRGDAGDGMATSNGMPFTTKDRDNDKWIKNCAETYKGAWWYNACHDANLNGLYLRGKHKEHAVGVNWKFWKGYDYSLKTSEMKLRPVGFVPSSGALK	0	28	10 (10)	36	1.97785e+07	0	46	15 (15)	49	8.34723e+07
Tt_041895-T1		neutral alpha-glucosidase AB-like isoform X1	921	105.6					MKMLLLLSVLTTLSLVVGVDRGNFKTCDQSGFCRRNRNMQPGESPYYLLMNNLKVSPTKIESRLANAKTGVLYTLEISALMDGMLRMKINEATPVRQRFEATEALNGEPKETSLKLVSQNSEGLTIEFGKHKAIIHANPFRLDVYSGDQHVISANTRGLMKFEHYRTKEQQKPENQEQEAPANQVGEEKPAAEVEDMDGAWEEHFKSHADSKPFGPSSVGMDFSFVGFKHVYGIPEHADALSLKQTKGSTDPYRLYNLDVFQFEVNNPMALYGSIPFMVAHSDKRTVGLLWLNAAETWIDIEPATQQSVVSSIVDFVKGSTQLPQTDTHWFSESGIIDVFFLPGPDPKDVMKQNAILSGTTPLPPYFSIAYHQCRWNYNDQEDVRNVDANFDDHDIPYD…	0	6	3 (3)	6	1461057	0	6	4 (4)	7	2.2375e+06
Tt_042143-T1	Tcp-1eta	T-complex 1 subunit eta-like isoform X2	422	46.7	F:GO:0005524; C:GO:0005737; P:GO:0006457; F:GO:0051082	F:ATP binding; C:cytoplasm; P:protein folding; F:unfolded protein binding			MQPIILLKEGTENIQGKSQLISNINACQAIAEAVRTTLGPRGMDKLIVDSKGKATISNDGATIMKELDIVHPAAKTLVDIAKSQDAEVGDGTTTVVLLAAEFLKQCKSYIEEGVHPQVIIKSYRKAVQLAVDKINEISVKVKKEDKKEHRALLEKCAMTTLSSKLVANEKTFFSKMVVDAVMQLDELLPLNMIGVKKVQGGALEDSKLISGVAFKKTFSYAGFEMQPKKYVNPKIALLNVELELKAEKENAEVRVESVQEYQNIVDAEWNILYEKLRKIHDSGAKVVLSKLPIGDVATQYFADRDMFCAGRVQEEDLKRTMKACGGSILSTTHDLTDSKNLGTCELFEEMQLGGERYNLFTGCSNTKTVTIILRGGAEQFIEETERSLHDAIMIVRRAM…	0	10	3 (3)	7	70921.5	0	9	2 (2)	4	518035
Tt_042222-T1	Rsf1	RNA-binding Rsf1-like isoform X1	140	15.9					MERRERGTRVFVGGLTEDIQKEDLEEAFSKVGNIVSVWVARNPPGFGFVEFDDREDADEAVNSMNGQLINETRIRVDRARERRGRGGFQGGRNFREGYDRRGPSYDSYRGDSGFGRRGGYRSNDGGSYSHRSRSPMGNRY	0	44	8 (4)	27	1.4156e+06	0	31	3 (2)	11	1.51408e+06
Tt_042278-T1		sorting nexin-6-like	391	45.5	F:GO:0035091	F:phosphatidylinositol binding			NRSETVDLTDQSLLVDISDALSERDKVKFTVHTKTTLPDFQKSEFSVVRQHEEFLWLHDALESNENYCGFIIPPAPPRPDFDASREKLQKLGEGEGAMTKEEFNKMKQELEAEYLATFKKTVAMHEVFLQRLAGHPVFKMDHSFRVFLEYEKDLSVRGKNKKEKFVGLISNIKESADDMLLSTTQKDVDEFFEHEKNFLMEYHTQVKDATWKADKMTRCRKNVSDTYLTIASTLLQLATIDATDLERVFTKSSETLEKVRKVEGRVASDEDLKLSDTLRYYMRDTSAVKNLLYRRLRSLANYENANRILDKARSKNKDVQEAENQQQEACEKFENISKLAKQELQDFKTRRVAAFKKNLVELAELEVKHAKAEVQLLKNYLTSIQEDDFRH	0	6	2 (2)	4	342144	0	9	2 (2)	5	594360
Tt_042317-T1	MTHFD1	C-1-tetrahydrofolate cytoplasmic-like isoform X1	938	101.5					MSGEGLAKILSGKEIAREIQNQLTNEVKEIKQKFPDFKPKLVIVQVGGREDSNVYIRMKIQAAADVGVEATHVNFPRSISQGELISEVQKLNGNPSIHGIIVQLPLDSEQPIDSNLITNSVSPHKDVDGIHDENAGRLAHGQLEGYFLPCTPSGCMELIKRSGITLKGSRAVVIGRSKIVGMPMAQLLCWHHATVTTCHSRTKDLPQVVSEADIVVAAVGQPQMVRKDWVKPGAVVIDCGINTIPDSTKKSGTRLVGDVAYNEVQHVASHITPVPGGVGPMTVAMLISNTVKAGKLALEKIQITSWKIRTLPLKCLTPVPSDIEISRAQSPKDIEELAAEIGLCTQEYELYGRKKAKVSINVLERLKNRKNGKYVVVAGITPTPLGEGKSTTTVGLSQA…	0	3	2 (2)	3	261247	0.017	1	1 (1)	1	245417
Tt_042405-T1		serine arginine-rich splicing factor 11-like isoform X2	229	25.8					MSEMKTEVQYESTIQTTQKDIENPIKDINKKSNHLGVGENVVGCNATEEPALKKVKLAKDNIFVETAKAAKEYLGQEDLEETRSGTRAVRDSSKAAMKRLSTMAKTAKEGEALLKELGYADEAAESQKRRTRSQTRGDPIPAPSLKRTPRQEATRRGRRGRPRKEERRSSSEDLDQKDEKEDIKEDSNDMKEQETTKVNNKENEEQKEKGINPQTDVSMGENEPPSSEN	0.006	5	1 (1)	1		0	5	1 (1)	1
Tt_042510-T1	Eno	alpha-enolase	433	47.1	C:GO:0000015; F:GO:0000287; F:GO:0004634; P:GO:0006096	C:phosphopyruvate hydratase complex; F:magnesium ion binding; F:phosphopyruvate hydratase activity; P:glycolytic process	EC:4.2.1.11	Phosphopyruvate hydratase	MPISKIYARQIFDSRGNPTVEVDLTTDKGLFRAAVPSGASTGIYEALELRDGDKTSYHGKSVRKAIDNVNNTITPALLAKNFEPTQQVEIDEFLLSLDGTENKGKLGANSILGVSLAVCKAGAAQKGIPLYRHISDLAGNSDVILPVPAFNVINGGSHAGNKLAMQEFMILPTGAGSFTEAMKMGSEVYHHLKNVIKKRFGLQATAVGDEGGFAPDIQNNKEALELIKEAIDIAGYTGRIDIGMDVAASEFYKEGKYDLDFKNPNSDPAQWLTPDALASMYQEFIKDYPVVSIEDPFDQDDWDAWSSFQAAVQIQVVGDDLTVTNPKRIQQAVEKKACNCLLLKVNQIGSVTEAIKAHQLAKSNNWGTMVSHRSGETEDTTIADLVVGLCTGQIKTGAP…	0	52	19 (8)	119	8.85811e+07	0	65	25 (14)	107	1.52172e+08
Tt_042513-T1	eIF-5A	eukaryotic translation initiation factor 5A-1-like	156	17.2	F:GO:0003743; F:GO:0003746; P:GO:0006413; P:GO:0006452; F:GO:0043022; P:GO:0045901; P:GO:0045905	F:translation initiation factor activity; F:translation elongation factor activity; P:translational initiation; P:translational frameshifting; F:ribosome binding; P:positive regulation of translational elongation; P:positive regulation of translational termination			MEDDPIYNKASAGASQTYPVQCSSLRKNGYVMLKNRPCKIMEMSTSKTGKHGHAKVHLVGLDIFTNKKYEDLCPSTHNIDVPNVNRSDFQLIDISDDGYVSLMDDKGDTRDDLKLPEGELGQKIREDYGRDDATVIVTVLSAVGEEAIIASKNATN	0.023	4	1 (1)	1	668465	0	30	3 (3)	3	721686
Tt_042558-T1	Gapdh2	glyceraldehyde-3-phosphate dehydrogenase-like	333	35.9	F:GO:0004365; P:GO:0006006; P:GO:0006096; F:GO:0050661; F:GO:0051287; P:GO:0055114	F:glyceraldehyde-3-phosphate dehydrogenase (NAD+) (phosphorylating) activity; P:glucose metabolic process; P:glycolytic process; F:NADP binding; F:NAD binding; P:oxidation-reduction process	EC:1.2.1.59; EC:1.2.1.12	Glyceraldehyde-3-phosphate dehydrogenase (NAD(P)(+)) (phosphorylating); Glyceraldehyde-3-phosphate dehydrogenase (phosphorylating)	MAKVGINGFGRIGRLVLRSCLEKGIEVVAVNDPFIDVNYMVYMFKYDSTHGRYKGEIRAEGGMLIVGGQKIHVFQEMKPSSIPWGKLGAEYVVESTGVFTTLEKAKPHIEGGAKKVIISAPSADAPMFVMGVNHEKYDPSMEIISNASCTTNCLAPLAKVIHDNFGIVEGLMTTVHAVTATQKTVDGPSSKAWRDGRGANQNVIPASTGAAKAVGKVIPELNGKLTGMAFRVPVSDVSVVDLTCRLAKEASYDEIKAAVKAASESDHWKGILGYTEDSVVSSDFIGDSHSSIFDAAAGISLNKNFVKLISWYDNEYGYSCRVADLITYIHSRA	0	32	8 (4)	44	1.41821e+07	0	51	13 (7)	45	1.02233e+08
Tt_042623-T1		sorting nexin-3-like	171	20.4	F:GO:0035091	F:phosphatidylinositol binding			MFTNMDSEEKVTQDSTRRLQPKKQTLDDAYAAPANFLEIDVLDQITHGFGRNRYTDYEVKMKTNLPVFKMKESSVRRRYSDFEWLRTELERNSKIVVPPLPGKAWKRQLPFRADEGIFDEEFIEERKKGLEMFINKNKSWIKLIFQGKLEAHEKIFIDLYGPSCQYNIFWK	0	22	4 (1)	11	178325	0	22	4 (1)	7	396438
Tt_043051-T1	Pepck	phosphoenolpyruvate cytosolic [GTP]-like	585	64.9					MPGLRNIDSKNTAYGASEPVITPGKLVRVGSRIFSIIHGDLSNLKPKVREYVEQKARLCKPENIHICDGSEAENNYLLDLMKKQGMITPLRKYENNWLARTDPSDVARVESRTCICTPNKNDTIPTPKEGVTGKLGNWISPEDLNKALSERYPGCMQGRTMYVIPYSMGPIGSPVAKVGIELTDSPYVVCCMRIMTRIGSAVLKALGDGDFVKCLHSVGQPLPMEPPINNWPCNPAKTIISHIPENNEICSFGSGYGGNSLLGKKCFALRIGSFLGKREGWFAEHMLILGITNPQGVKRYIVAAFPSACGKTNLAMLTPTLPEYKVECVGDDIAWMWFDKEGQLRAINPEYGFFGVAPGTSHKTNANAMYSMQKNTIFTNVAETSDGGFFWEGLEDEAP…	0	9	4 (3)	9	1.04165e+06	0	10	4 (3)	5	495226
Tt_043227-T1		fibrinogen C domain-containing 1-like	486	55.9					MLNDSRTNFYNFIIRFNIIVFAGVIIIGSYITCKADPETTTPTSSERRHGYNIDPSVSSVLQQILQRLSTLEADQLQGSAQRQEIRQVLNRIEQNRKEVILSLDRSESRVTQQLDTIKGELRKILTVQEILQQDVKDLQQNQLLNKLWFEEKLRTLQKPENEEEFDLDFDPSHKVSCKNAAVLSNLQILQTTLYGLRRTTVHLQDQLNHVQNNMTYLTNLTRSVQKRTERTVTTEYLRTALRATSEEQIPPVMACVQHFTSPQETEETLASNCFELLREGNNVSGIYRIRPSHALRPIFVFCDMQTDGGGWTVIQRRKDGSVNFLREWNEYKYGFGNIGGELWLGNDNIHLLTSQTLNELRIDLSDFEDGHVYAKYAGFAIGNEKEKYMIKVLGEVSGD…	0	21	10 (10)	41	2.38409e+07	0	46	17 (17)	71	8.87232e+07
Tt_043322-T1		vacuolar sorting-associated 13C-like	3221	360.7					MFESIVVDLLNRFLGDYVENLDRSQLKLAIWGGDITLKSLDIKQNALNELDLPVKVVSGHLGELVLKIPWKNIYSAPVIAKIDGLYVVVTPNASQAYNEDKEKKMAKEAKKKELQRIEDAKAREVQKDKDKEQKQDTFTEKLVTQIIRNLQVKIMNIHVRYEDNFTNPASPFAVGITLHSLFFETTDENWKPCVIQEAVKMFNKLVTLDSLGVYWNSNVELLSEMNYAERKNAMIQIIASKEYKPMNVSYLLGPISLTAKMILNPKPETDGSNFSIPKVQLDITIEDIAIGMSKSQYQDVIRLLEALDRMTLASKYRKYRSNEPYKNNAKVWWKFGVTCVLEEDIRRRKRNWSWVHMQQHRTNCRKYKELYKQSLMSKKISQTIQQQIDEYENELDIFN…	0	1	3 (3)	5	293770	0	1	2 (2)	3	237908104
Tt_043479-T1		C-reactive -like	235	25.6	C:GO:0005576; F:GO:0046872	C:extracellular region; F:metal ion binding			MISGYIVIFVITLVSAGVAVDIRDVKISFPGSQNPSFPHLRFHQTLPAVRQLTVCQRIKPFHRNVGYIFSCATPNQYNQFITSMSVKPEGTLTLGLQVNGSSNKYISCPIEIELGHWYHVCHVWSGLNGRMGVYVNGSPCGIMENVEKGHQISAGGTVVIGQEQDKIGGGFNEKESWSGELSDLQVWDEALTAHQVATVASCNGIRPRGNIISWMEDSFVADDGVIVGISHMCSL	0	13	3 (3)	24	5.36866e+07	0	47	6 (6)	19	2.65299e+07
Tt_043818-T1		techylectin-5A-like isoform X1	292	33.8	C:GO:0005576; F:GO:0030246; F:GO:0046872; P:GO:0098609	C:extracellular region; F:carbohydrate binding; F:metal ion binding; P:cell-cell adhesion			MFRTLKLLLLIGQNYGITSSQNPEHCEVASLTGMLDSVTFLVSNVKEQLQNKVTKERTCRPISPGPRDCAQVFLNGHQTSGVYRIWPTPWETVGSLNVYCDMNTEGGGWTAIQRRGDYGNPTDYFYKPWQDYKQGFGNIVKDFWLGNDWIFAITNQGNYSLRFDLKDKENNTRYAIYENFWIDNESHLYRLHVNGYSGDAGDSFGPHNGYNFSTKDRDHDTYDTSCAQKFKGGWWYLNCHGSNLNGLYLNGEHESYADGINWKEWKGYHYSLTEVEMKIRPLNFNPFERESV	0	16	4 (4)	19	1.65591e+07	0	48	11 (10)	160	5.45672e+08
Tt_043825-T1		uncharacterized protein LOC106475632	694	80					METEEENNISKLNEQVKSVTREEDIKEDMFLETIPHINWEHYLIPAPMSIALLGELMFITNDTDFSLEKAKPEKGFQYIRYPSSFYASLAQVTNAGWDAFNEAHKIMDQIRLHSANVPVYLDESIKILTKGTSKDIKNFLPISLEGIKDIADRCLNLAISTEERFTDVMNLTGEILEACTFSKMTYEEDLRETKVQLQIIKDNQKAIEEERSMARDQLEDIKKEIESAEKLFEEVMKSFPSGLKLTGISLAESIANGVKNFVSGLFSAFSRKEKKKIEEEDDDLTKRKTQSSEFKMDEATRKSLNRACSKAEIIQHLAQKLQFLVYDDDSLDKEELRRGDTEIFVACYSRRICKEINTECTSLLQMKAVRILNKMIGICKDLENIKKDFQVNQTKLIVE…	0.002	2	1 (1)	2	320922	0	11	6 (6)	6	1.62647e+06
Tt_043838-T1	ANGPT4	uncharacterized protein LOC106468611	599	67.8					MGRNTAALGLIVLLCFQDICNTSPPKSTEELLQHIYTVVTSIDSHLLKEERLREITRFFRIDSALEAIQKQVASLSDHGGLARSSVSQDHEIHKALGKVDVKLASMGNTLSSLHTAMENQLGGSIQKLKDVEENTRSLRSDLDSKLPKLMNIITALYEINKQLKNEFHPERTRGAIPTSPSVGIQSRSDIYKEHLLEKRLEETEKKILEEMSVISVKTRSQLNSLETISNNVLAQSESILSHVESVKNQMKSHKPHSTNWPLPSDYARDYKDNQEDMCKVVTSTVLRKNLDNMMQNLSRSQRDIKEDFHHNMQELDKKLYLLSEVASSSKSCKSSDHLIPSESARSLVVAPAIQDVTRKPKTVRPTDCSIQSHNSMPNNCAELRQGGATCDGVYIIFPQ…	0	61	47 (47)	652	6.53197e+08	0	60	30 (30)	276	6.61705e+08
Tt_043962-T1		Tubulin beta chain	446	50.2	F:GO:0003924; F:GO:0005200; F:GO:0005525; C:GO:0005737; C:GO:0005874; P:GO:0007010; P:GO:0007017	F:GTPase activity; F:structural constituent of cytoskeleton; F:GTP binding; C:cytoplasm; C:microtubule; P:cytoskeleton organization; P:microtubule-based process	EC:3.6.1.15	Nucleoside-triphosphate phosphatase	MREIVHVQAGQCGNQIGSKFWSVISDEHGIDPTGTYHGDSDLQLERINVYYNEASGGRYVPRAILIDLEPGTMDSVRSGPFGQIFRPDNFIFGQSGAGNNWAKGHYTEGAELIENVMDVVRKESESCDCLQGFQLAHSLGGGTGSGMGTLLISKMREEYPDRIMTTFSVFPSPKVSDTVVEPYNATLSVHQLVENTDETFCIDNEALYDICFRTLKLTSPSYGDLNHLVSITMSGVTTCLRFPGQLNADLRKLAVNMVPFPRLHFFMPGFAPLTSRGSQQYRAVTVPELTQQMFDAKNMMTACDPRHGRYLTVAAMFRGKMSMKEVDEQMWNVQNKNSSYFVEWIPNNVKLAVCDIPPRGLKMAATFIGNSTAIQEIFKRIAEQFTAMFRRKAFLHWYT…	0	19	5 (2)	14	820197	0	35	11 (6)	37	3.55571e+06
Tt_044076-T1	sesB	ADP ATP translocase 3-like	300	33.4	F:GO:0005471; C:GO:0005743; P:GO:0015866; P:GO:0015867; C:GO:0016021; P:GO:0055085	F:ATP:ADP antiporter activity; C:mitochondrial inner membrane; P:ADP transport; P:ATP transport; C:integral component of membrane; P:transmembrane transport			MSTLDPVSFAKDFLAGGIAAAISKTAVAPIERVKLLLQVQHASKQISPDKHYKGMIDCFIRIPKEQGFLSYWRGNLANVIRYFPTQALNFAFKDKYKQVFLGGVDKKTQFWRYFLGNLASGGAAGATSLCFVYPLDFARTRLAADIGKGSSEREFAGLGNCLVKIFKHDGLIGLYRGFNVSVQGIIIYRAAYFGFFDTAKGMLPDPKNTPIIISWLIAQTVTTVAGIMSYPFDTVRRRMMMQSGRAKEQRMYRNTIDCWKKIFKTEGGAAFFKGAFSNVLRGTGGALVLVLYDEVKNFIF	0	13	4 (4)	8	879005	0	4	1 (1)	2
Tt_044107-T1	La	la homolog	441	50.8	F:GO:0003676; F:GO:0003723; C:GO:0005634; P:GO:0006396; C:GO:1990904	F:nucleic acid binding; F:RNA binding; C:nucleus; P:RNA processing; C:ribonucleoprotein complex			MGIEEESKTGEVKGESSNNPEENKNAEEVKDAEVQKSPTELELKIIRQVEYYFGDFNLVKDHFLQEQIKKDDGWVPLETMIKFNRLKTLATDFVAIRKALEKSPTQLLQISEDGNKIRRDPSKPLPEKTKSYHDEMMSRTAYAKGFPRNTCLDDVLEFFESYGKVENVVMRKFPNSPTFRGSVFATFINKEDAEKFVAAKDIKFKNISLLRQMNVDFKKRKEIEYQERMKKKQKEKENQARDEEADDQKFVEEEIVKGCVLKLSGLSKNISRMDIKEIFNPHATVAYVEYNVDDPEAFVRFAEEGVAMFAVEKALTGESDDKKLVICGTELKYQVLEGEEEQQYWKRFAKTRAAWRKNMQKNNSSGRGRRGFGRKRGGGSGRRGRGPRGGRQFSQEDRN…	0	8	3 (3)	4	112824	0	14	4 (4)	8	1.02599e+06
Tt_044299-T1		NEDD8-conjugating enzyme Ubc12-like	183	21	F:GO:0005524; F:GO:0016874; F:GO:0019788; P:GO:0045116	F:ATP binding; F:ligase activity; F:NEDD8 transferase activity; P:protein neddylation			MIKLFSTKQQRKEGETSGRTASSQKRASAAQLRITKDINELNLPKTCQMDFPDPDDLLSFKLIISPDEGFYRGGRFVFSFKVSHNYPHEPPKVKCETMVYHPNIDLEGNVCLNILREDWKPVLTINSIVYGLQYLFLEPNPEDPLNKDAAEVLQSNRRLFEQNVKKAMLGGYVGSTYFERCLK	0.002	8	1 (1)	1		0.03	5	1 (1)	1
Tt_044383-T2		techylectin-5A-like isoform X1	301	34.9					MMRLKINQMMISIQIVMILLLVHQSCQIEINLKRCQMTSVSTLLDSISVLVTQAKDKIHSDEMECLQTSSGPRDCTDVFLNGNHTSGVYRIWPKSWMFTGSFDVYCDMDTDGGGWTVIQRRGDYGNPTDYFYKSWQEYKMGFGDIDKDFWLGNYWIFTLTNQGTYSIRFDLTDKEGEKRFALYREFRIDNEDLYYRLHVKGFTGDAGDSLKYHNGLNFSTKDSDHDTHSGSCAESYKGGWWYGKCHSSNLNGLYLNGEHESYANGVNWKAWKGYHYSLKTVSIKIRPLNFDILVNNRNIPM	0	7	2 (2)	6	1.49028e+06	0	23	8 (1)	36	4.78095e+06
Tt_044393-T1		techylectin-5A-like isoform X1	199	22.7	C:GO:0005576; F:GO:0030246; F:GO:0046872; P:GO:0098609	C:extracellular region; F:carbohydrate binding; F:metal ion binding; P:cell-cell adhesion			MTSVFIWFVYMVGTSSGSEFVTKQCQEKSITGIVESIDVLVSLAKENLKTKGETSHASLSRGNDRIYALTNQGNYSIRFDLKDKEGNERFAIYREFWIENENNLYRLHVSNYTGDAGDGFIGHNGFSFSTKDKDNDIHEKSCAQVFKGGWWYDKCHSSNLNGLYLNGEHESYADGVEWSAWKGQKYSLPDVEMKIRPLY	0	19	3 (1)	126	3.11405e+08	0	49	8 (1)	60	2.95384e+06
Tt_044514-T1	FKBP59	Peptidyl-prolyl cis-trans isomerase FKBP4	507	57.2	F:GO:0005488; F:GO:0016853	F:binding; F:isomerase activity			MSHNLLFLSGSEKPAGFGISAKGKILESRFSIQRERTYPNKLRDITMTMNEEDQKSKTYAPGPNAVDITPEKDGGVLKEIIKEGMGNETPATGHTVVVHYTGRLTDGTVFDSSVERGEKFQFQLGKGEVIKAWDMGVATMTKGEKAVLTCKPEYAYGESGSPPKIPENATLVFEVELFDWKMEDLTSKKDGGVLRKIIHSGQGSTTPNEGASVEVHLTGKYNGVVFEERDLAFPLGEGSEYGVVEGLEIALEKFKKGEKSIINLKPKYAFGSEGKAEFNIPPNAEVQYEVEMKNFEKAKQSWEMDSDEKLEQSEVVKTKGTDYFKAGKYSMAIKQYKKIVSFLEFEKYDEEERKKQCETLLLAAHLNLAMCYLKVDNNKEAISSCDKALEKDPNNVKGF…	0	10	4 (4)	11	1.49806e+06	0	24	8 (8)	13	2.03202e+06
Tt_044732-T1		fibrillin-2 isoform X1	2870	315					MIISTVFLCLCLCIPNVELTAGSRIRNGRQRSSNNSQRPANLGGPNLCKGPQGPSCCPGWTFIPGTLMCTVPLCIQSCGNGRCIRPNLCYCNNGNIAVHCGTTGGPGLIGPGIHPGPRIPGPGISDQRVPGVVIPGSGGVVPGGQGIPSHRYPVCREPCLNGGRCIGQDRCSCVYGFSGRRCELDVRTGPCFRRVKNQFCAGQLTGVVCTRQLCCATIGVAWGHPCEECPSDLDCDRGFITNINSRSCQDVDECDAIPGLCAKGKCVNSIGSFHCECEEGYERDKDTDSCIDVDECKSLASICQHGRCINTKGSFYCICDRGYIPSPNNKACLDTRRGDCYLDFSSGRCLNKLSVRLSKMECCCGDNMGKAWADKYCEPCPLSGTRDYNTLCDISLAIN…	0	3	7 (7)	20	5.88884e+06	0	3	6 (6)	10	1.25728e+07
Tt_044758-T1		tropomyosin-like isoform X3	251	29.3					MSMIQQGSMLEMLKKKMKAVKDELETAKEQLEETEARLQEEVRRREEAESEVAALNRRIQLLEDDLERSEERLKIATQKLEEASQAADESERQRKALENRTNLEDDKMSILEAELGQARLLAEESDKKYEEMARRIAVLEADLERAEERAHGGESKVVNLEEELRIVGNNLKSLEVSEEKALQKEESYHQQIRQLSDRLQEAEARAEFAERSMQKLQKEVDRLEDELMEEREKSHLLQEEVETTLKDIASM	0	70	25 (7)	131	4.33985e+07	0	75	33 (9)	298	3.20302e+08
Tt_044758-T4		tropomyosin isoform X3	284	32.8					MEAIKKKMQVLKEEKENAVDRAEVAERQCREANARVEKAEEEVRVLQQKIQCLENELDSVQELVTGTNTSLAEKDKSLQNAESEVAALNRRIQLLEDDLERSEERLKIATQKLEEASQAADESERQRKALENRTNLEDDKMSILEAELGQARLLAEESDKKYEEMARRIAVLEADLERAEERAHGGESKVVNLEEELRIVGNNLKSLEVSEEKALQKEESYHQQIRQLSDRLQEAEARAEFAERSMQKLQKEVDRLEDELMEEREKSHLLQEEVETTLKDIASM	0	55	21 (2)	95	2.21558e+06	0	69	27 (3)	250	1.59877e+06
Tt_044782-T1	Fur1	Kex2-like protease	863	97.1	F:GO:0004252; P:GO:0006508	F:serine-type endopeptidase activity; P:proteolysis	EC:3.4.21	Acting on peptide bonds (peptidases)	MASNCRIFSINSTKLLLLQCFFTLLSTLLANNSHYTDQFVVRVEGGPKVAKELAEKHGFVYLGEIFDNYHHLRHHQVSKRSIEPSLRHHEALHSDKQVKWFSQQTLKKRSKRDLSYFYTETVPYLNDPKWKDMWYLNRGNNLDMNVKPAWDMKVSGKGVVVTILDDGLEKDHPDIKENYDPKASYDVNNNDDDPQPRYDIINSNRHGTRCAGEVAAIANNSICAVGIAFHAGIGGVRMLDGDVTDAVEARSLSLNSQYIDIYSASWGPDDDGRTVDGPGELATEAFIHGIEKGRNGLGSIFVWASGNGGRNNDNCNCDGYTNSIWTLSISSATENGLVPWYSEACSSSLAATYSSGSGGEREIITSDLHHSCTTQHTGTSASAPLAAGICALALEANKQ…	0	5	3 (3)	10	5.42758e+06	0	9	5 (5)	10	2.03351e+06
Tt_044846-T1		pantetheinase-like isoform X2	496	56.3	P:GO:0006807	P:nitrogen compound metabolic process			MILTLPSHILKLLGIISYVHWPSQTDYFTAAVYEHVRLGDDDPLQIAIQKNIKIYTEVTGRAAAGGADIIVFPEYGLYSAKSIRQENRKILEHIPNPEKENWNPCVQKEEFKDRPILTKLSCAAKVNRIVLVANMGDLQPCQISQDPHCPPDGEYHYNTNVAFGRDGTLLARYHKMHLFFEIGYNIPSTPEYAIFNTDFGVMGMFTCFDILFEDAMKLVRDHGVQTVLFPTWWFDELPFLAAHQFQEAWSLGLGVNLVATNIHEPSLGSLGSGIYSGTQGALNYTHTPDGKPKLLFAQLPKNPNNWHSKNNIRSRPISRQNLNTSNLVFNTSTPSYHYEQTDLLNYTLSKLHKSSDRIVACNNGLCCTVEYDTNALKYNFYLAVFNGIRSVKDHYFWCE…	0	6	2 (2)	4	1.14551e+06	0	14	5 (5)	11	1.35308e+07
Tt_044855-T1	PPO1	hemocyanin subunit VI	644	74.4	F:GO:0016491; F:GO:0046872; P:GO:0055114	F:oxidoreductase activity; F:metal ion binding; P:oxidation-reduction process			MVLDTVEKQLRVLPLFEYASIPTKEKFALKVHRDPKLQGLGVLGRGQLFSLFHAEHLAEATKLYEVLIDDSLTTGAKTFEEFLDFCHQVRDFVNEGLYVYAVSVAILHRPDCKGVSLPPIQEIFPDKFMPVQTMYDAYKEAWLNPNKEEDIIVDMQSTGNILDPEYNLAYYREDIGINAHHWHWHIVYPATWRPEVIGKVKDRKGELFYYMHQQMCARYDCERLSNGMPRMEPFHNFHDTLEGYSSHLSSSINGLPYPSRPDGMTLQDLKEVSIQELERWRDRILDAIHIGHLEDENGSHVPLDETRGIDVLGAIVEASYESVNQAFYGSIHNWGHVITARVQDPDGRYHLNPGVMSDTATSLRDPIFYRWHRFIDNMFQDYKETLPHYNHSDLEFPGI…	0	75	80 (72)	8846	4.75036e+10	0	96	84 (75)	11783	1.38421e+11
Tt_044873-T1	Hsc70-5	heat shock 70-2393	690	75	F:GO:0005524; C:GO:0005739; F:GO:0031072; F:GO:0032440; P:GO:0034605; P:GO:0034620; P:GO:0042026; F:GO:0042623; F:GO:0044183; F:GO:0051082; P:GO:0051085; F:GO:0051787; P:GO:0055114	F:ATP binding; C:mitochondrion; F:heat shock protein binding; F:2-alkenal reductase [NAD(P)+] activity; P:cellular response to heat; P:cellular response to unfolded protein; P:protein refolding; F:ATPase activity, coupled; F:protein folding chaperone; F:unfolded protein binding; P:chaperone cofactor-dependent protein refolding; F:misfolded protein binding; P:oxidation-reduction process	EC:1.3.1.74; EC:3.6.1.3; EC:3.6.1.15	2-alkenal reductase (NAD(P)(+)); Adenosinetriphosphatase; Nucleoside-triphosphate phosphatase	MFAVSRVNVNKSLQFSNLSITFLKRKFTSFSRNTSAAVHYQNGKDIQRRQKSDGPKGAVIGIDLGTTNSCVAVMEGKSARVIENAEGARTTPSVVAFTGDGERIVGMPAKRQAVTNAANTFSATKRLIGRRYDDSEVQKDMKTVSFKIVRASNGDAWVEAHGKMYSPSQIGAFILMKMKETAEGYMGHPIKNAVITVPAYFNDSQRQATKDAGQIAGLNVLRVINEPTAAALAYGMDKSGDKVIAVYDLGGGTFDISILEIQKGVFEVKSTNGDTFLGGEDFDNALVNYLVKEFKKDQGIDVSKDNMAMQRLKEAAEKAKIELSSSVQTDINLPYLTMDVSGPKHMNLKLTRSSFENLVQNLIKRTVEPCKKAIQDAEVKKNDIGDVILVGGMTRMPKV…	0	14	9 (9)	26	5.25399e+06	0	4	2 (2)	2	897529
Tt_044874-T1	RpL26	60S ribosomal L26-like	104	12.3	F:GO:0003735; P:GO:0006412; C:GO:0015934	F:structural constituent of ribosome; P:translation; C:large ribosomal subunit			MKMNKLVTSSRRKNRKRHFNAPSHIRRKIMSAPLTKELRQKYGVRSIPIRKDDEVQVVRGHYKGQQIGKVVQCYRKKYVVYIERIQREKANGASVYVGIHPSKL	0	41	5 (5)	28	5.89847e+06	0.005	8	1 (1)	1	964976
Tt_044885-T1	Lam	lamin Dm0-like	596	68.8	C:GO:0005882	C:intermediate filament			MFSKKYSSAVIIMFLMCVIKGRSMSSKTSKKSTTTTHHTITKTAQSPQVSTSFSERGDSERPSSPLSPTRLTRIQEKQELQHLNDRLAVYIERVRELQVENDRLSIQVQSSQETVKKEITTVKSLYEQELSDARKLLDETAKEKAKVQIDAGKWKSELDEVQLKLNKKEKDLAATEKKLLNSEVQNQDLQSRLNQAVSDRKRFEDELKEVQAERDKLAKQLATSKSQLEDETLNRVDLENRLQSLKEELTFKDSVHEKEMSETRSFQQTEISEIDGQLKEQYDQQLANTLMNLREQYETQMKVNRDEIETIYEKKIAELQKLVDQHSSSATSARDELRTFKTQFDNLSLKIGDLESKNISLQNRIKDLEQLLEQERDWHQNAMQAKEDELKKLKEQMEQ…	0	15	7 (7)	13	1.4569e+06	0	12	5 (5)	5	1.22912e+06
Tt_045036-T1	Gpdh	src kinase-associated phospho 2-A-like isoform X1	580	65.8					MVFLVYVSVREQILQSGRNRSLSTSSRPMPVAFSITVVRQNVIENRQNLLLWFCEHYLETLGYLTPQNFLVMNTFTPNERPKDRKVQQLEIPSPSSFLKPIKTGYLRKYSQRTWFLPGSWKRKFCVLDGTKIYFYENEGCKGTERSAGVISLDYYDLCFEGSTKDNKRASNVFIISSSVRGFFDMQHLFSADTLPEMSEWVTLIKEAISEARSKRSRAGRAHGKDKRKKEPMRPRSVDSSPVFKVSTNRPSSHGALELPSGERLYTPTKDRDRGPRGRRLPQRKTMMTRLGEDGDLRIRASSLSALENVDSAKNESWLKYSPNISGPRRTNSGTDLAYKYSSSEDSVTEEDVSTTATQGFPYSGTASSRSSTLGHTRGSGMQNGNHTKRTASDSTSAAK…	0.002	4	2 (2)	2		0	3	1 (1)	2	256306
Tt_045099-T1	Tbp-1	26S proteasome regulatory subunit 6A-B	430	47.8	F:GO:0005524; C:GO:0005737; C:GO:0008540; F:GO:0016787; P:GO:0030163; P:GO:0045899	F:ATP binding; C:cytoplasm; C:proteasome regulatory particle, base subcomplex; F:hydrolase activity; P:protein catabolic process; P:positive regulation of RNA polymerase II transcriptional preinitiation complex assembly			MAATTLEDKAIWDDGDDAVGEEILRMSTDDIIGRTRLLDNEVKIMKSEVMRISHELQAQKEKIKENTEKIKVNKTLPYLVSNVIELLDVDPQDLGEEDGANVDLDSQRKGKCAVIKTSTRQTYFLPVIGLVDAEKLKPGDLVGVNKDSYLILETLPQEYDSRVKAMEVDDRPTEQYSDIGGLDKQIQELIEAVVLPMTHKEKFENLGIQPPKGVLLYGPPGTGKTLMARACAAQTKSTFLKLAGPQLVQMFIGDGAKLVRDAFALAKEKAPAIIFIDELDAIGTKRFDSEKAGDREVQRTMLELLNQLDGFSSTTDIKVIAATNRVDILDPALLRSGRLDRKIEFPAPNEEARARIMQIHSRKMNVDPDVNYEELARCTDDFNGAQCKAVCVEAGMIAL…	0	7	2 (2)	5	200221	0	8	2 (2)	4	199538
Tt_045154-T1	CHRNA10	neuronal acetylcholine receptor subunit alpha-7	268	31.4	F:GO:0005230; P:GO:0006811; C:GO:0016020; F:GO:0038023	F:extracellular ligand-gated ion channel activity; P:ion transport; C:membrane; F:signaling receptor activity			MKEESYCTCPMQIKPMGPWCVIHSYFLHMFYLYFSTVVSANTFIVFHHRHSRQFSALCFCVPEISDFISNASQNNFVSGTEAKVVVKHTGEVLWVPPVDIQTICPIEPNSYEYHCNLTFGSWVRSIKDVDVLPDSHLGADGDSFLRVHHKWELVDMKVTRKNVLYRCCPERYPAVVYTLHFKRRQESRQSSPHVANNRLTFQYMFYVYKTIIVSLNYTFRAIFIINEIEKQTLINQFSKFEGVFFTVRLKMARTTLCCSKQTSKWDQV	0	16	4 (4)	25	3.7555e+06	0	15	4 (4)	10	1.19414e+07
Tt_045367-T1		sorting nexin-2-like	516	59	C:GO:0005829; P:GO:0006886; C:GO:0030904; F:GO:0035091; P:GO:0042147	C:cytosol; P:intracellular protein transport; C:retromer complex; F:phosphatidylinositol binding; P:retrograde transport, endosome to Golgi			MSDFKETPPLSANVGLNEDDNDDLFSSALESQTVENTSPSDNHKQDESNGNFENLFQGGGEEVNLDDDGPPVSPERKLEFCTPEEERKSPFLESSSDKIPKPAFPAEITPTEPPKPAARKAAKSQEEAEEESGDQFLNISVNEPQKIGDGMGAYMIYKVETKTNFPYFKNKNMVVSRRFSDFLGLHDKLVQKHLHLGRLVPPAPEKSVIGMTKIKMSKDELGSSSDFIEKRRAALERYLNRTASHPVLRLDPDFREFLELESDLPRATSTSALSGAGVMRLFNKVGESMSKMTFKMDESDPWFEEKQHQMENLEQQLRKLHSSVEALVHHRKELCNTTDLFAKSIAMLGNCEEHTALSRALSQLSEVEEKVEQVHMSQSNKDFFLLAEMLKDYIALIGT…	0	2	1 (1)	2		0	13	6 (4)	12	1.99625e+06
Tt_045427-T1		tubulin beta chain-like	445	50	F:GO:0003924; F:GO:0005200; F:GO:0005525; C:GO:0005737; C:GO:0005874; P:GO:0007010; P:GO:0007017	F:GTPase activity; F:structural constituent of cytoskeleton; F:GTP binding; C:cytoplasm; C:microtubule; P:cytoskeleton organization; P:microtubule-based process	EC:3.6.1.15	Nucleoside-triphosphate phosphatase	MREIVHIQAGQCGNQIGAKFWEVISDEHGIDPIGSYHGDSDLQLERINVYYNEASGGKYVPRAILLDLEPGTMDSVRSGPFGQLFRPDNFVFGQSGAGNNWAKGHYTEGAELVDTVLDVVRKESESCDCLQGFQLAHSLGGGTGSGMGTLLISKIREEYPDRIMNTFSVMPSPKVSDTVVEPYNATLSVHQLVENTDETFCIDNEALYDICFRTLKLTTPTYGDLNHLVSVTMSGVTTCLRFPGQLNADLRKLAVNMVPFPRLHFFMPGFAPLTSRGSQQYRALTVPELTQQMFDAKNMMTACDPRHGRYLTVATIFRGRMSMKEVDEQMLNVQNKNSSYFVEWIPNNVKTAVCDIPPRGLKMSATFIGNSTAIQEIFKRISEQFTAMFRRKAFLHWYT…	0	29	9 (1)	20	893143	0	51	18 (10)	71	4.55327e+07
Tt_045444-T1		synaptic vesicle membrane VAT-1 homolog-like	431	47.2					MAEEKTGGKPDETNLPENQTEQKNEENQTTVPKDMKAVVLTGFGGLKSVKIVKKPQPSVGEGEVLIRVRACGLNFLDVMVRQGVIDSPPKTPFILGFECAGEVEGIGEGVSDIKIGDRVAALTEYKAWAELTSVPAKYVYPLPPGMEFQDAAAMLMNYVVAYIILFDVGNLRSGQSVLVHSAGGGVGLAVSQLCKTVPEVTLIGTASKHKHDSIKESFTHLLDHSVDYVHEIKKISPEGVDIVLDCLYGDDANKGYNLVKPLGHYILYGSANIVTGETKSFFSVAKSWWQVDKVNPMKLFDENRSMSGFQLRHLLYQQGAHEYVHGVVNKVFKMWTDGQIKPVLDSTWAFEDVPEAMQKLHDRKNVGKITLDPSKEPKPKPKLQTKGSKEKDKEKDSKT…	0	25	9 (9)	32	1.11253e+07	0	50	19 (14)	79	5.77137e+07
Tt_045469-T1	RpS19a	40S ribosomal S19-like	154	17.4	F:GO:0003735; C:GO:0005840; P:GO:0006412	F:structural constituent of ribosome; C:ribosome; P:translation			MYTILSVLFQMPSISVKDVDQHEFVQAFAAFLKKSGKLRIPDWVDLVKTGIYKELAPYDEDWFYVRCASVARHLYLRAPVGVGALTKIYGGRHRRGTAPAHFCRGSSSIARKALQALEQLKMVEKDDNGGRRLTSQGRRDLDRIAAQVKSKTSK	0	40	7 (7)	19	4.93238e+07	0	19	2 (2)	3	1.10945e+06
Tt_045477-T1		gelsolin, cytoplasmic-like	738	84.4	F:GO:0051015	F:actin filament binding			MVVDPVFEGVGREPGILIWRVEQFQIVPVDLKEYGNFYSGDSYILLHTKRLRSGNLEWNIHFWLGKNTSQDEAGVAAIKSVELDDSLGGIPVQHREIEGHESKMFLSYFKKKGVRYLEGGVVSGFRHVEGKVVKRLLQVKGRHNVRVFQVPMNANSMNKGDCFILDCGSDIYVWVGQQSRHMERIKAVQAANGIRDDIHGGRSNIHLVDEHSSPSDFQKFFEELGSGSESDVKEASEGGDDLEHERTKETAVTLYKVSDDEGPLKVERIAEKPLKQKYLDTNQCFILDSGVSNLFVWVGKGASQRERKESMKIAEKYIDYRNYPKWVSITRVIEGGEPPMFKQFFASWKEPEDQVGLGRVYKPEEIAETQPDGGFNIPSLHRKKRRLIAKSLGKAFGFM…	0	38	33 (33)	199	9.21524e+07	0	63	49 (49)	258	4.29889e+08
Tt_045743-T1		uncharacterized protein LOC106460335	878	97.2					MESNAFCLDLRVKVLYVSVGCLYIFCGVNLYYTYIVSQNNQCLKAASTVSEDSRSLARYTGIPKIQKSTNSDVSVNALDVKQQKAELMYTINSTLTASEKHLNLTGVWEIDQSNQPLHRIKRRGKRHGRRLHARESSESDTPSVEFFPEPQPTPKTKDYIWLTAYSRIPVPVLRDYCQSTKEHCPPGDPGPPGIPGSPGHKGQKGDTGERGFSGQPGPPGPRGLTGAHGPVGPKGDPGLAGTPGLDGRDGLPGEPGLDGVPGRDGIDGIPGNDGVPGIPGTPGRPGLNGTNGIPGTPGPRGPMGPVGPAGLPGPRGRKGVSGTPGIPGIPGIKAWNINGTEATKLLIPPAMVDTEQQTTMVVEEGENIRLKCTAYGKPQPTMTWRREDSSPILIGSWYL…	0.002	3	1 (1)	2	426749	0	3	2 (2)	4	308064
Tt_045748-T1	SUB1	activated RNA polymerase II transcriptional coactivator p15-like	96	11.2	F:GO:0003677; P:GO:0006355	F:DNA binding; P:regulation of transcription, DNA-templated			MMYDSSHFLRNPPPKKVKTDNVSQSKSKSEDSLFQLSKMRFVSVREFRGKVMVDIREYYESDGDLKPGKKGICLNLDQWKALKSHIDNIDEAIKQF	0	14	1 (1)	3	249700	0	26	2 (2)	2	680830
Tt_045865-T1	SUCLG1	succinate-- ligase [ADP GDP-forming] subunit mitochondrial-like isoform X2	331	34.6					MATVGLLARNLACSAQNQIRVLGSRSCYSVTRSHLMVNRGTKVICQGITGKQGTFHCQQAIDYGTNIVGGVSPGKGGSKHLGVPVFNTVEEAVRETGAVASVIYVPAPLAGKAILEAIDAELPLVVCISEGIPQKDMVYVKHRLLRQTKTRLVGPNCPGIIKPDECKIGIMPGHIHRKGKIGIVSRSGTLTYEAVHQTTQVGLGQSLCVGIGGDPFNGTNFMDCLEVFLDDPGTKGVIMIGEIGGAAEERAAEFLKLHNYGNSAKPVVSFIAGLTAPSGRRMGHAGAIIAGGKGGAQEKIEALKEANVTVTKSPAQMGAAMLLEMQKKGLA	0	14	3 (3)	11	2.47877e+06	0	38	9 (9)	17	1.36718e+07
Tt_045986-T1	CCT6A	T-complex 1 subunit zeta	581	63.6	F:GO:0005524; C:GO:0005737; P:GO:0006457; F:GO:0051082	F:ATP binding; C:cytoplasm; P:protein folding; F:unfolded protein binding			MRIFTKIIQAGVLSKYCRKKNVNAPLYKISRSLIPVCFPLSLVLCSTLKMAAVSYVNPKAEIARHAQALSVNISAARGLQDVLKTNLGPKGTMKMLVSGAGDIKITKDGNVLLHEMQIQHPTASLIARASTAQNDISGDGTTSTVLVIGELLKQADLYISEGLHPRLVTEGFELAKNKALEVLENIKMTKEMDRDILLNVARTSLRTKVHHDLADCLTEVCVDAVMSIKQEGLSLDLHMIEIMEMMHKTEHDSTLIKGLVLDHGARHPDMKKYVKDAYILTCNVSFEYEKSEVNAGFFYKSAEEREKLVQAERQFIENRVKKVIDFKKKICAGTEKGFVVINQKGVDPLSLDMFAKEGIVALRRAKRRNMERLALACGGTAVNSVDDLTPECLGTAGLV…	0	19	8 (8)	29	7.61114e+06	0	15	6 (6)	8	1.39756e+06
Tt_046057-T1		beta-glucuronidase-like isoform X3	629	72.3	F:GO:0004553; P:GO:0008152	F:hydrolase activity, hydrolyzing O-glycosyl compounds; P:metabolic process			MKINVIVSLIFAWFVYSDSLSPLESEIRERKILDGIWDFKICDIKNQDIGFQEKWYTKALRKTGDVIPMPVPSSFNDITQNKTVRDYVGWAWYETQFFIPNSWNTKEQRIVLYFGSAHYHASVFLNGISVVNHTGGHLPFQVDVTDYVMFSVKNRLTVALSNILTHHTIPQGKVIYKNNSEEYPEAFYVQNVNFDFFNYAGIHRSVILYTTPTVYIDDITVVTKINGTTGIINYVVTFNSVQPFYKSPSCHVEVFDMDNDLVARGKKCQDVITVRNAKFWWPVGMHPQPGYLYTLKVTLEGGNVKDIYYQTVGIRTVKVTDRTFLINGKPFYFMGFGKHEDANIRGKGVDLPLIVKDFNLIKWIGANSFRTSHYPYAEEIMDQADKQGVVVIDESPAVG…	0	10	7 (7)	21	4.58111e+06	0	9	4 (4)	4	1.82034e+06
Tt_046150-T1	Pdi	disulfide-isomerase isoform X1	500	57.4	F:GO:0003756; C:GO:0005623; C:GO:0016021; P:GO:0045454	F:protein disulfide isomerase activity; C:cell; C:integral component of membrane; P:cell redox homeostasis	EC:5.3.4.1	Protein disulfide-isomerase	MWFRTFGLLFLCVVIAVGEDEIKKEENVLVLNKDNFDKVLKDNKYILVEFYAPWCGHCKALAPEYAKAATQLADEKSDIKLAKVDATEETELAEKHGVRGYPTLKFFRDSEPLDYSGGRQADEIILWLKKKTGPPALTLKTVEETTQFKEGSEVVIVGFFKDLESKEAKVFLDAAVVTDDYPFAITSQDEVYKELDAQKDGIILYKKFDEGKNVFEGDLTVDNIKKFVKANSLPLVVEFNHESAQKIFGGEIKSHNLLFISKTASEYEKILEDFRNIAKEFKNKVLFVTIDTDEEDHERIMEFFGLKKEDTPDMRLIVLEDEMNKFKPETTKITVENIRNFVQGVLDGKIKQHLLSQDIPEDWDKNPVKVLVAKNFDEVVFDKSKDVLVEFYAPWCGHC…	0	24	15 (15)	116	5.97031e+07	0	57	26 (26)	116	1.40253e+08
Tt_046185-T1	Sep2	septin-2-like	416	48.3	F:GO:0005525	F:GTP binding			MRDTSGIRSLTPHGHVGFDTFPDQLVKKSLQQGFTFNILCIGETGLGKSTLINSLFNTNFDSTQTSHALPGVRLRSNMFELQEKNVKLKLTVVETVGYGDQINKEDSFKTIVDYIDTQFESYLQEELKVQRSLSEFHDTRIHACLYLICPTGHGLKSIDLLCMKKLDNKVNIIPVIAKSDVISKTELQHFKIKIMSELVANGIQIYQFPTNDENVAELNANMNKQVPFAIVGSTDTIRFGNKMIRARQYTWGTVQVENENHCDFVKLRDMLLRTNMEDMREQTHNCHYQLHRRLRLEQMGFSDLGADNKPVPFHENYEKKRQEQLEILQQREEEMRQSFVIRVKEKESELKESEKALLAKYEHMNKQLEQEKLKIEDQSKKLDEELNNFNKKKEVLQHA…	0	12	3 (3)	5	414866	0	13	4 (3)	6	1.14567e+06
Tt_046418-T1		uncharacterized protein LOC106472839	260	29.3					MQIFVIFLLLFLPLCCPRKHRNLYRENVVTRALHERREMVLRTVKSNQAFSDYMKKLIGNFRVLMRTGSDVLHLPVLDPLKLPNKDINKNNHGTRIRANLKNLRINGLSQIQITTIQADIQNLKLELGLLIPNLSVTGTYFLQGIVAKLFPLNGNGKFQVTATNAKIYGAAVLILTPDGIIQLDNVDLDIDFRAISVNFNNLLGGGPFGSFLNKLMSSFGHSIFNAFKGRLIEKLETSLKRSVNRDLAKVKFAEIIKGKL	0	32	10 (10)	82	7.44575e+07	0	65	20 (20)	152	4.00545e+08
Tt_046513-T1	Uba1	ubiquitin-like modifier-activating enzyme 1 isoform X4	1089	122.5					MRHFKHLSFIKLLSVEGAILPESGCWFRYIMSSAADSEPHNATEQSLSPPAKKRKTNSVSHPNSTPDKSVVSGDMAHNGSSAQHDGNDIDESLYSRQLYVLGHDAMRRMASSDVLISGMGGLGVEIAKNIILGGVKSVTIHDESLCELNDLSSQFYVREADVGRNRAETCLQHLQELNTYVKVNAYTGKLTEDFLKNFRVVVLTDTPLEEQLRIGDYTHSENIGLIIADTRGLFGQIFCDFGENFTVVDVTGEQPISVMIASISKDKEGLVTCLEESRHGFEDGDYVKFSELLGMVELNDSEPKKVKVLGPYTFSIGDTSNLSDYVRGGVATQVKMPKSINFKSLRDSIGSPEFLVSDFAKFDRPGQLHIGFEALHYFKKRHNRLPVSWNKEDANELVS…	0	8	5 (5)	9	1.46886e+06	0	24	18 (18)	34	1.04908e+07
Tt_046524-T1	Sod	superoxide dismutase [Cu-Zn]-like	339	38.7	P:GO:0008152	P:metabolic process			MRAIVVFLAVFLTLFLHPNAEQQNLASEVESLKSNLTTLWKVLIQFRYVMTENMEHIHAHQRELHGTLHKILYDHKRLSMKHGGMSTEHFHQDHHDDSDDHGEDNVTRGHHHHHEKQDHFEHHHPKLTFLHGHSGHRGKHAYRRRRLFLHGDEYERAICKMRPNRAIPREKQQNVRGTIFLWQQKNHATLHIHVQVRGFNVSRHEHGEHAGAKSHQHGFHVHETSDFSNGCQSTGPHFNPTNAEKHGGPNSQIRHVGDLGNIACNKYGVTDMIFTDSVASLTGPHSIIGKPLVIHADPDDFGTNPHIPASLTSGNAGTRISCCIIEKIQDSSRQNHDND	0	55	19 (19)	615	1.41182e+09	0	47	16 (16)	524	3.53637e+09
Tt_046615-T1	Prosalpha5	proteasome subunit alpha type-5-like	241	26.6	F:GO:0004298; C:GO:0005634; C:GO:0005737; P:GO:0010499; C:GO:0019773; P:GO:0043161	F:threonine-type endopeptidase activity; C:nucleus; C:cytoplasm; P:proteasomal ubiquitin-independent protein catabolic process; C:proteasome core complex, alpha-subunit complex; P:proteasome-mediated ubiquitin-dependent protein catabolic process	EC:3.4.25	Acting on peptide bonds (peptidases)	MFLTRSEYDRGVNTFSPEGRLFQVEYAIEAIKLGSTAIGIQTSEGVMLAVEKRVTSTLMESTTIEKIVEIDTHIGCAVSGLMADSRTMVDKARVEAQNHWFLYNEKMQVESVAQAVSNLAIRFGDSDDDGVAMSRPFGVAILFAGIDERGPQLYHMDPSGTYVQYDAKAIGSGSEGAQQALQEEYHKSMTLEEATKTALKILKQVMEEKLNSTNIEVAAVTPDKGYHMFTKEELEEVIKNI	0	8	1 (1)	2		0	40	7 (7)	16	3.25929e+06
Tt_046772-T1	SND1	staphylococcal nuclease domain-containing 1-like	899	101.3	F:GO:0004521; C:GO:0005737; C:GO:0016442; P:GO:0031047; P:GO:0090502	F:endoribonuclease activity; C:cytoplasm; C:RISC complex; P:gene silencing by RNA; P:RNA phosphodiester bond hydrolysis, endonucleolytic			MSQQQQTQPPAAQRGIVKQVLSGDAIIIRGQPRGGPPPEKQLNLSYINAPKLARRANPNVESSQETKDEPYAWEAREFLRKKLIGKEVCFTIEYKVPNSTREYGLVFVGKDTSGENVVESVVAEGLAEVRRTGVKPSDIQQKLCELEDAAKTAGKGRWSSDPSHNHVRDIKYTVENPRNFIDSLHQKPVNAIIEHVRDGSTLRVLLLPDYYQLTVMISGIRCPTFKMGEDGQSQVAEPFADEAKFFTECRLLQREVEVILESVSNQNFLGSILHPNGNIAELLLKEGFARCVDWSITVVTGGPDKLRAAERSAKESRLRIWRDYTPSGPTIDSKDKEFSGKVVEVVNADSLVIKLSNGSVMKVFLSSIRPPRLSEEKQNEIQKDNKGRTFRPLYDIPYM…	0	8	5 (2)	16	1.95611e+06	0	3	2 (1)	2
Tt_046805-T1		ras-related ced-10-like	195	21.9					MTSKGNRPIKIVVVGDGTVGKTCMLISYTTGSFPETEYVPTVFDNYAGNLECDGVRVSLTLWDTAGQEDYERLRPLSYPGTDVFLLCFSVDKQASYDNIATKWHPEIRHHCPQAPYVLVGTKIDLRNSKDLPEDVQLVSKSMGRKMATKIKAEKYVECSAKTMEGINEVYEEAVRAVLNPKSSLRIRVPRNCRLL	0.023	6	1 (1)	1		0	13	2 (2)	3	968965
Tt_046809-T1		leukocyte elastase inhibitor-like	419	47.3	C:GO:0005615	C:extracellular space			MKKEATQTVLVLVLCTIFRGAWAQCLSQNDAVNNNGIERSVDKLVNGSLQFGLDLFRLLYNEHNSISSGLFVSPFSIWSALAVTLMGAKGQTKQQISNVLGVRGLDKIVIAKAYNNLHHRDQSGSNSNNTYRLANKLFFQMDSSLRQCILEYFPADITRVDFRADPEGSRQSINQWVEEQTNNKIKDLLPPFSVNPTTNFVIANAVYFKGTWLKQFDTRNNRKARFLTGPGQQKEVEMMFTTDVFLYGISETLQCTAVELPYSGQELSMVILLPEQSDSGLDNLIRLITPSRLHELSNSMYPHQVLLYLPKFHIENDFDLAETLQRLGLRDIFNPVFADLSGFTGRRDITVDAIRHKTYVDVNEEGTEAAAATGILALRISRPDGPTLFKANHPFFFYI…	0.006	2	1 (1)	2	255022	0	14	5 (5)	9	2.35473e+06
Tt_046913-T1		fibrillin-2-like isoform X1	1346	149.9					MSVCWRKIARTIYLSAIGILIHLSTSTSDIEPLLQSCCKLGTTWGNNIPNCGNYPTPIPQIPNNQQSVCLSVIEICCTQVHRHRMCKRGKETAQSGQECSVLPTFEGVTHKDCCDGCKVGLIVAGMNMPCLLSNFAFQSPWHEAYSDCCNLNYISQGGDSDDRCETNNPCSQKCIDTGIVIQCSCYPGFVLASDQRTCEDINECILGTHTCNILTEICHNTIGGFQCFRNGEESQLLDDDCQLGYYKNLQTGECNDLDECTLGTHSCIHETEVCLNTPGSYTCSQSIGFQCQPGFKPGNTTGNCVDVDECAEGLDNCLPNIEVCLNNHGSYQCQDRSSQDCPAGFKWNTDLEACEDVDECEENLHACSPEEGQCHNTAGGYECRKQCSPGLIYNTFLHS…	0	9	10 (10)	32	2.67858e+07	0	26	26 (26)	98	1.33165e+08
Tt_047080-T1		thymosin beta-4-like isoform X2	90	10.1	F:GO:0003785; P:GO:0007015	F:actin monomer binding; P:actin filament organization			MSSPKKEDLPTVPSAMKDELANFDSAKMKHAHTVEKKVLPSNEEIKQEKEQQQLLQGIKSYDPSKLRHAETQEKNELPTKETIALEKGAA	0	77	7 (7)	38	5.97164e+06	0	72	6 (6)	16	7.55979e+06
Tt_047814-T1		fructose-bisphosphate aldolase-like	321	35.4	F:GO:0004332; P:GO:0006096	F:fructose-bisphosphate aldolase activity; P:glycolytic process	EC:4.1.2.13	Fructose-bisphosphate aldolase	MVHFNYLSEEEQTKLRQTAEAIVAPGKGILAADESTSTMGKRLAGIGVENTEENRRQYRQLLFTSDEIMKEYISGVILFHETVYQKTDDGTSFVQILKNRGIIPGIKVDKGVVPLMGTDEESTTQGLDDLTKRCQEYKEQGCLFAKWRCVLKIREHNPSPLAILENANVLARYATCCQQAGIVPIVEPEVLPDGTHDLERAQKVTEKVLAAVYKALNDHHVYLEGVTFLSGGQSEEEASINLDAINKYPGKKPWALTFSYGRALQASALKAWSGKGENVKAGQEEFLKRAKANSEAALGKYTGGVSGAAAEDTLFIKNHQY	0	39	12 (7)	55	2.14843e+07	0	38	11 (7)	28	1.77304e+07
Tt_047929-T1	FIBCD1	plasma carcinolectin	295	34.2					MSSIPYGRSVCIRFISGSIASLMSKLLNIDNNSYDVFSTTTPERTFPSLVNDKQNRSVQESLCVTQTTEQKPPLPEDCASIYKQKLNRTSGVYKIQPRFMNQSIFVYCDMETSGGRWTLIQRRGDFGKPVENFYRSWVEYKNGFGNLTQEFWLGNDVIFSLTNQDSMVLRVDLEDFEGSRRYAEYDEFLVGSERELYKMNYKTYKGDAGNSLAHHNNMMFSTKDKDNDRNSGSCAQNHRGGWWYNSCHRCNLNGVYYTEDKVDTTGITWYDWKSKHSTLKTSEMKIRPVEFIIGQ	0	20	6 (3)	33	4.75848e+07	0	40	14 (5)	254	2.58266e+07
Tt_047983-T1		carcinolectin 5b	238	27.6					MDKILELNEGVIPPESGRSQISLDVNSQFVLADVHHHTACNTVGSLKGIVDSVTELVDLARERISTLEDVFFTTTLERTFPSLVNDKQNRSFQQYLCVTQTTEQKPPLPEDCASIYKQQLNRTSDVYRIQPRFLNQSISVYCDMETSGGGWTLIQRRGDFGKPVENFYRSWVEYKNGFGNLTQEFWLGKTLYIYLTVINYLFFSYYLVLFDLINYLLSYKLFIYYTLLLFQEMTSSSH	0	16	4 (2)	88	2.34169e+06	0	24	6 (1)	182	6.59864e+07
Tt_047996-T1	LSM4	U6 snRNA-associated Sm LSm4	145	15.5	P:GO:0000398; P:GO:0000956; F:GO:0003723; C:GO:0005681	P:mRNA splicing, via spliceosome; P:nuclear-transcribed mRNA catabolic process; F:RNA binding; C:spliceosomal complex			MLPLSLLRTAQNHPMLVELKNGETYNGHLVSCDNWMNINLREVICTSRDGDKFWRMPECYIRGSTIKYLRIPDEVIDMVKDEVLAKGRGRGDARRGGGAGQRGRGGGRGAFGARGGGRGGSGGGPPRGGGGSGRGSSRPKPNRER	0	23	4 (4)	9	1.46081e+06	0	11	1 (1)	1
Tt_048046-T1		14-3-3 epsilon-like	261	29.9					MTEREDNVYEAKLAEQAERYDEMVEAMKKVASLDNELTVEERNLLSVAYKNVIGARRASWRIISSIEQKEENKGNEGKLEMIRQYRIKVENELRDICQDILDVLDKHLVPVANTGESKVFYYKMKGDYHRYLAEFAAGNDKKEAAENSLLAYKSASDIANCELPSTHPIRLGLALNFSVFYYEILNSPDRACRLAKAAFDEAIAELDTLSEESYKDSTLIMQLLRDNLTLWTSDMQHDGEGENEQQSKKEEVEDAEEQDVS	0	19	5 (2)	15	1.06501e+06	0	59	16 (7)	46	6.61074e+06
Tt_048120-T1		adenylyl cyclase-associated 1 isoform X2	475	52.4	F:GO:0005515; P:GO:0007010	F:protein binding; P:cytoskeleton organization			MSTNLESLVSRLENVAVKLESTTVKGQGMSLNESVGDSLAPFVVAYDEVLDGSFKSFLSLSAELGKEVQSLTKIVDSAVKAQRTFLVTVSKARQPSQNDLISLLKPTSDQIQAVQDFREKNRASAYFNHLSAVSESIPALGWVTVVPAPAPYVKEMLDAGQFYTNRVLMDYKDKEKTHVDWARNWLQFLQDLQAYIKKYHTTGLIWNSSGCDVIDLSSSLPLSANCPPPPPPPLRTDELISGESSEEGNRAALFKEINQGENITKGLRKITSNQQTHKNPNLRIQASSPYKGPPTTARPFKPYSSGSGASTATSQMPSKPPKMELEGKKWIVEYHQGRKDLVIDQVQMGHVIQVFQCNDCVLVVKGKLNTINIDSCKKTSIVFEDIVSSVEFVNCERIQ…	0	5	3 (2)	7	3.06665e+06	0	26	8 (6)	16	4.48644e+06
Tt_048165-T1		polyadenylate-binding 4-like isoform X1	644	71.4	F:GO:0003723; C:GO:0005737	F:RNA binding; C:cytoplasm			MNPSGPNYPMASLYVGDLHPDITEAMLFEKFSSAGPVLSIRVCRDMITRRSLGYAYVNFQQPSDAERALDTMNFDTIKGRPIRIMWSQRDPSLRKSGLGNVFIKNLDKSIDNKAMYDTFSAFGNILSCKVATDEEGNSKGYGFVHFETEEAANNAIQKVNGMLLNGKKVFVGKFIPHNEREKLMGEKARRFTNVYVKNFGDDLDDEKLREFFEKYGKITSAKVMSDNEGKSRGFGFVSFEDPESAERAVDDMNTKEMNGRLLHVGRAQKKTERQAELKRKFEQLKIERITRYQGVNLYVKNLDDVIDDARLRNEFAPYGTITSAKVMTDSNGRSKGFGFVCFSSPEEATKAVTEMNGRIVVSKPLYVALAQRKEDRKAHLASQYMQRMAGMRMQLGQMF…	0	16	9 (9)	22	2.42882e+06	0	3	2 (2)	3	257424
Tt_048176-T1		plasma carcinolectin	316	36.4					MYNTVNILSILSFFVLTQADVHHHTACNAVGSLKGIVDSVTELVDLAREKISTLEDVFSTTTFQRTFSPLVNDKQNRSFQQSLCMTQTTEQKPPLPEDCASIYKQNLNRISGVYRIQPRFLDKSISVYCDMETSGGGWTLIQRRGDFGKPVENFYTSWVEYKNGFGNLTQEFWLGNDVIFSLTNQNNMVLRVDLEDFEGSRRYAEYDEFLVRSERELYKMSYKTYKGDAGNSFASHNNMMFSTKDKDNDKNGGSCAQSYKGGWWYNNCHSSNLNGLYYTEDKEDATGVTWYHWKNKHSTLKRSEMKTRPMEFIIGQ	0	21	6 (4)	112	2.83846e+07	0	39	12 (6)	186	3.86369e+07
Tt_048180-T1	FIBCD1	plasma carcinolectin	316	36.4					MYNAVKILSILSFFVLTQADVHHHTACNTVGSLKGIVDSVTELVDLARERISTLEDVFSTTTLKRTFPPLVNDKQNRSFEQYLCVTQTTEQKPPLPEDCASIYKQKLNRTSGVYKIQPRFMNQSISVYCDMETSGGGWTLIQRRGDFGKPAENFYRSWVEYKNGFGNLTQEFWLGNDVIFSLTNQDNMVLRVDLEDFEGSRRYAEHDEFLVRSERELYKMSYKTYKGDVGNSLASHNNMMFSTKDKDNDKYSGSCAQSYKGGWWYNSCHASNLNGLYYREDKVDTTGVTWYEWKSKHSTLKSSEMKIKPVKFIIGQ	0	20	6 (3)	107	1.59886e+07	0	56	16 (10)	380	6.55589e+08
Tt_048188-T1	FIBCD1	plasma carcinolectin	451	52					MQNTVKILSILSFFVLTQADVRHQTACNTVGSLKGIVDSVTELVDLAKERISTLEGVFSATTLERTFSPIVNDKQNRSFEQTLCVTQTTEQNPPLPEDCASIYKQQLNRTSGVYKIQPQFLNQSISVYCDMETSGGGWTLIQRRGDFGKPFENFYRSWIEYKNGFGNLTQEFWLGNDVIFSLTNQNNMVLRVDLEDFEGSRRYAEHDEFLVRSERELYKMSYKTYKGDAGNSLDHHNNMMFSAKDKDNDKYSGSCAQSYKGGWWYNNCHNSNLNGLYYTEDKVDTTGITWYTWKSKQNTLKTSEMKIRPVEFIIETKQCTLPHSSDNNTKRRNCKSRLNKAREKIHEHIQQTMCRRRNNTENQTLIEKIYTNDSVNVESLVNVDENVLTETDLKSIIES…	0	14	5 (3)	37	9.46056e+06	0	39	15 (8)	233	1.38243e+08
Tt_048191-T1	FIBCD1	carcinolectin 5b	362	41.5					MYNTVKILSTLSFFVLTQAHVRHQTACNTVGSLKGIVDSVTELVDLARNRISTLEGKLFLDILFNTTIKQLTESPYLQSIRKQFCVINHLTMYNTVKILSILSFFELTQADVHHHTACNTVGTLKGIVDSVTELVDLARERISTLEDVFSTTTPERTFPSLVDNKQNRSVQESLCVTQTTEQKPPLPEDCASIYKQKLNRTNGVYKIQPRFMNQSIFVYCDMETSGGGWTLIQRRGDFGKPVENFYRSWVEYKNGFGNLTQEFWLASFTGNDVIFPLTNQNNMVLRVDLEDFEGSRRYAEYDEFLVRSERELYKMSYKTYKGDAGNSLAHHNNMMFSTKDKDNDKNNDSCLCSSTQRWMVVQ	0	23	8 (4)	126	9.2478e+07	0	35	14 (3)	402	1.07237e+08
Tt_048193-T1	FIBCD1	plasma carcinolectin	307	35.2					MPVPTGFVAADVHHQTACNTVGSLKGIVDSVTELVDLARERISTLEDVFSTTTVERTFPPLVDDKQNRSFQISLCVTQTTEQKPPLPEDCASIYKQQLNRTSGIYEIQPRFLNQSISVYCDMETSGGGWTLIQRRGDFGKPVENFYRSWVEYKNGFGNLTQEFWLGNDVIFSLTNQDNMVLRVDLEDFEGSRRYAEHDEFLVRSERELYKMSYKTYKGDAGNSLVSHNNMMFSTKDKDNDKKSGSCAQSYKGGWWYNNCHSTNLNGLYYTEDKVDSTGVTWYEWKSKHSILKTSEMKIRPVEFVIGQ	0	19	6 (4)	98	1.61892e+07	0	26	11 (3)	319	1.95144e+07
Tt_048196-T1	FIBCD1	plasma carcinolectin	316	36.5					MYNTVKTLSILSFFVLTQADVHYHTACNTVGSLKGIVDSVTELVDLARERISTLEDVFSTTTFERTFSPIVNDKQNRSFQQSLCVTNTTDQKPPLPEDCASIYKQKLNRTSGVYKIQPRFLNQSISVYCDMETSGGGWTLIQRRGDFGKPYENFYRSWVEYKNGFGNLTQEFWLGNDIIFSLTNQDNMVLRVDLEDFEGSRRYAEHDEFLVRSEKELYKMSYKTYKGDAGNSLAHHNDIMFSTKDKDNDRNSGSCAQTYKGGWWYNSCHNSNLNGVYYTEDKVDTTGITWHEWKSKHSTLKTSEMKIRPVEFIIGK	0	29	8 (4)	128	6.41272e+07	0	43	16 (9)	380	7.96599e+08
Tt_048238-T1	RpL19	60S ribosomal L19-like	246	29.4	F:GO:0003723; F:GO:0003735; P:GO:0006412; C:GO:0022625	F:RNA binding; F:structural constituent of ribosome; P:translation; C:cytosolic large ribosomal subunit			MWHFNVFKTSCYEDHSSKLSNYFKRKLHIVSNVIWRTTFSLFDCIQLRKMSSLRLQKRLASAVLKCGRNKVWLDPNETSEIANANSRQNIRKLIKDGLIIRKPVAVHSRARVRKNAEARRKGRHCGPGKRKGTANARMPHKVVWIRRMRVLRRLLKKYREAKKIDRHLYHDLYMKAKGNVFKNKRVLMEFIHKKKAEKTRTKMLSDQAEARRQKVKEARKRREERIQQKKVELLQAFQKEEEAAKK	0	24	6 (6)	21	3.18417e+06	0.008	4	1 (1)	2
Tt_048265-T1		phosphatase inhibitor 2-like isoform X3	196	22.4	P:GO:0043666	P:regulation of phosphoprotein phosphatase activity			MAEYLSKKPAKSILKTSTSFEHPESQKHQDIQWDEMNILQTLHPPDKDYGHMKVDEPKTPFNYYTDEDVGDKPGGERGALDTELLTKKINLESENLPKAMIEADDDDDDDEHGEETEEERANRKAFEYRRKIHYNEFYAVKLARKLMAQEGLESEDEDNREETMDESQSEATKASGGSSDEEVAEPTCNESTEISL	0	10	1 (1)	2	389689	0	10	1 (1)	1	1.05003e+06
Tt_048271-T1		polypyrimidine tract-binding 1-like isoform X1	547	59.2					MLLGAGLHVLNGGIRKSGLKRGSDELFSQATAVSNGGVMNSHTDHRDNNNDAKKVKLDRNLNKPSRVVHVRNIPNEAMETDVINLGIPFGRITNVLLLKGKNQAFLEMADETTAMAMVKYYNNSGTPTVRGRTVYVQFSNHKELKTDSTNPSSQVSTQAALQAAQALSSQTDTQGGPNTVLRVIVDNQIYPITLDVLHQIFSRVGKVLKIITFTKNGSFQALIQYPDVITAQAAKLSLDGQNIYNGCCTLRIDYSKLNNLNVKYNNDKSRDFTNPGLPMGDTGLDGIGFRGSVGVMGSPFTGLSGLGSPLTAAFAAAGGLPLGAFALPSGTGASTTLSLAGLGLPSPQTFGGCVLLVSNLNEEKVTPDALFILFGVYGDVVRVKILFNKKDNALVQMSE…	0	7	3 (2)	3	246195	0	7	3 (1)	3	699689
Tt_048273-T1		calponin-2-like isoform X1	237	27					MFPVSSRKPYNWSQLNSRKEIFDRVGSVRPHNYLMKMAYQGPAYGLSRECQIKSKKKFQLDQALQALDWVREVTNEKLEPPNPERGFEDQVDFADSLKDGIALCKLINILMPGAVPKINEGKMPFKQMENIEMFLKGCTKYGLKPHDLFQVNDLYERKNLYMVVSCLFTLGGLAQKRGFDGPVIGVKLAEENRRNFSKEQLDMSKTVLSLQTGTNRGASQSGMTPYGATRQILPDRR	0	19	4 (3)	11	6.25133e+06	0	52	12 (11)	37	2.5325e+07
Tt_048428-T1		leukocyte elastase inhibitor C-like	423	47.3	C:GO:0005615	C:extracellular space			MKILGVILFLVTCPFGLLFEFYHSDVQKKELLEKLGDTGVHIDSLAGAIKVTNASNSFGLALYHALSESGNLFISPFSLFNTLNMVYLGARQSTAEQMSSVLGYSRVGLDTKSVLSGLQQTNDLLNSQRTDYDLEAANAVLIQRGLGLLASYQQALTRNLSASLREVDFATEGQKVQHEINSWASRKTRNKIPNLLTKPLPSDSRLALLNAVYFKGTWQTMFDQMLTQSETFYNNGRTPVRVDMMHSKSKFPFSYDSQLRVYALEMPYRGSHISMLVLLPEERNGLRALEGALSNSYLQSTYNRLLERRVEVAMPRFKLEAKYEDGLMRTLQDMGMSDVFDSGRANLAGITGQPDLYLTKVIHKAYVEVNEEGSEAAAVSVVVGVERMGGGNNERFIAN…	0	56	18 (18)	72	2.61156e+07	0	68	26 (26)	183	4.55932e+08
Tt_048432-T1	Sur-8	leucine-rich repeat soc-2 homolog isoform X1	459	50.9					MSGCITGGQEADPSPSSTSSHHDQPTTSKETSKEKKISPGSLGSSDVARPAKQVTVTHPGTTKPKPTGTTRKRVSTQADLDVSKEFIRCKEEGATRLDLTKCSIVVLPSSVKELTHLREFYLYSNKLQTLPLEIGCLVNLETLALNENSLTSLPDTLSNLKQLKVLDLRHNKLNEIPDVVYTLTSLTILHLRFNRIREVGEDIANLVNLSMLSLRENKIRELPAGIGKLTVLVTFDASNNHLKHLPFEIGQCSQLSSLDVQHNELVDIPESIGQLKSLTRLGLRYNQLTSVPQSLSNCVKLTEFNVESNNLSQLPEGLLSSLSHLTSLTLSRNAFTSYPVGGPSQFCFVYSINMEHNQINRIPFGIFSRANNLTKLNMKDNKITSLPLDIGTWTCMVEL…	0	3	1 (1)	1		0	12	3 (3)	7	1.31571e+06
Tt_048444-T2		F-actin-methionine sulfoxide oxidase MICAL3-like	740	84.6					MFFPIKTYAIHKRSHCKGVKKSRYVAIVFFQKFADDDQKSEPMTEEEETLMSVSKLKSSYIQQAQENSVSPTRDLITTGISVKTLSTSFTSEQDDTTRDLEVINTGISVSQLKSSLAEQPEGCGEKEPLEDIKPSIDRAKATLTFSQSQSEEQEVSCKVCGKHVYLMDKIMAVKSAFHKSCFRCKECGKSLNMDTYFSHMGEIYCKLHHKHLLQPKIYNGERLKDDNKTEEITAVEDLDNIRLRFESPLEECYPLTKENTISLTRTESIQARMAKYQSAVSKVHQNGEHFISSEEDDDNLTKLKNDENKELSDLRETIGARSSETMRAAYERACKEANTASPTRGQSISFGKEVKAVNIKQKFENGDLDQENNEKMERARREKEEDLSIVNETRDSVAG…	0	5	5 (4)	19	2.70847e+06	0	3	2 (2)	4	2.02946e+06
Tt_048460-T1	R	ras 3	228	26.1	F:GO:0003924; F:GO:0005525; C:GO:0016020; P:GO:0032486	F:GTPase activity; F:GTP binding; C:membrane; P:Rap protein signal transduction	EC:3.6.1.15	Nucleoside-triphosphate phosphatase	MREYKIVVLGSGGVGKSALTVQFVQGIFVEKYDPTIEDSYRKQVEVDGQQCMLEILDTAGTEQFTAMRDLYMKNGQGFVLVYSITAQSTFNDLQDLREQILRVKDTDDVPMILVGNKCDLEDERVVGKDQGANLARSFNNCAFLESSAKAKINVNEIFYDLVRQINRKNPEKKSNPVKKNKCIILQSSKKYYRQMVCPKFCRLKFEVKCYMTMKKGVKLKAYTLGLFD	0	15	4 (4)	7	816987	0	35	9 (2)	21	1.37329e+07
Tt_048877-T1	Phm	peptidylglycine alpha-hydroxylating monooxygenase-like	211	23	F:GO:0004497	F:monooxygenase activity			MLGNMEFLSIWLVFVLIVTHSLATVKFPMHMPDVQPTQKETYLCTAFKMPAQEHQYIVEFEPNATMHTAHHILIYGCSTPGFWATDDPRAVWDCGEMAGGVSEYRRAPTCASGSQVIYAWARDAPKLTLPEGVGFKVGGSDTGIEYLVLQVHYANVDKFINGATDDSGVILSMLPGTTNKVNKRAAILLLGTGGIIPAHREGKISLLAISQ	0	7	2 (2)	6	1.59971e+06	0	5	1 (1)	3	7.27512e+06
Tt_048906-T1	RpS18	40S ribosomal S18	153	17.8	F:GO:0003723; F:GO:0003735; C:GO:0005840; P:GO:0006412	F:RNA binding; F:structural constituent of ribosome; C:ribosome; P:translation			MSLVIPEKFQHILRVMNTNIDGKRKIMFAMTAIKGVGRRFANIVCKKADVDLNRRAGELSEEEVEKLVTIMTNPRQYKIPDWFLNRQKDVKDGKYSQVVSNALDNKLREDLERLKKIRAHRGLRHFWGLRVRGQHTKTTGRRGRTVGVSKKKN	0	38	7 (7)	27	7.257e+06	0	13	2 (2)	3
Tt_049166-T1		matrix metallo ase-16	191	22.3	F:GO:0016787	F:hydrolase activity			MRKVDAAFRWNTGITYFFKGDCYYRYQEKTNKMSNNNSLKCHPITEWGGMTGPVDSVFRWSDGVTYFFKENCYYRYDDEKNKLSNCNPITAWGGMTGPVDAVFLWSNGVTYFFKRNCYYRYDDENNKLSKCSPVTTWGGMTGPVDAVFRWSNGTTYFFKEDCYKKYEDRSEKLSGCNPFSALGEGIDQIFP	0.029	10	1 (1)	2		0	30	4 (4)	16	1.27446e+07
Tt_049170-T1	rump	myelin expression factor 2-like	274	27.2					MSVRMDKFKSDESDGLPAKLPTGLQSVGKGLGAGGQPLNLNKSFNVANLGATSAAVSGGSSAIGMGGASSGGLGAMAGGATNLGMGMGAGNMGNMGNMMANNMNAMASVSGMGLNTAMGSNMGMNAAMGTGFTGNMGAAAGLGIGATGANMGLATNTNMMAAMGGGATGMGAGTALGLGAGIPNTGGSFGDMNRLSFNQSTQSSDTVMVENLPASYTWQALRDRFRDVGDVRFAEMKGRGSGLIRFKAERDAQRAVDLMNGIRIDGRPIQVRLY	0	18	3 (1)	10	715326	0	8	2 (1)	2
Tt_049215-T1	rump	myelin expression factor 2-like	536	56.6					MDQDQDVNGSSSLEMKRENRSRSRSPVEQKERGSRDGSRGGRGRYDNRSSRGQNNHRVYVANIPYESKWTEVKDLFRKEVGEVNYVELFQDESGKFRGCGVVEMKDNASVQKAIDTLHKYEYRGRTLVVKEDFEVERDKHGRPITRTSRERGMSMNNNFGGGIVGSGSSSQYNTYGLSPQFLESLGIQGPLTCKVFVANLDYKVDSKKLEEVFKLSGKVVNIDLKTDEEGNSKGHGTVTFDHPVEAVQAISMFNGQKLFARTMSVRMDKFKSDESDGLPAKLPTGLQSVGKGLGAGGQPLNLNKSFNVANLGATSAAVSGGSSAIGMGGASSGGLGAMAGGATNLGMGMGAGNMGNMGNMMANNMNAMASVSGMGLNTAMGSNMGMNAAMGTGFTGNMG…	0	23	10 (9)	38	9.86629e+06	0	4	2 (1)	2	1.68994e+06
Tt_049290-T1		lectin L6-like	239	26.3	C:GO:0030133; F:GO:0030246; P:GO:0042742; F:GO:0046872	C:transport vesicle; F:carbohydrate binding; P:defense response to bacterium; F:metal ion binding			MTQRITFLLLSLSAVCLGVQWHQIPGKLMHITATPHFLWGVNSNQQIYLCRQPCYDGQWTQISGSLKQVDADDHEVWGVNRNDDIYKRPVDGSGTWVRVSGKLKHVSASGYGYIWGVNSNDQIYKCPKPCNGAWTQVNGRLKQIDGGQSMVYGVNSANAIYRRPVDGSGSWQQISGSLKHITGSGISEVFGVNSNDQIYRCTKPCSGQWSLINGKLKQCDATGNTIVGVNSVDNIYRSG	0	75	17 (17)	1072	3.86352e+09	0	80	17 (17)	967	6.1935e+09
Tt_049563-T1		Hexosaminidase D	670	77.6	F:GO:0004553; C:GO:0016020	F:hydrolase activity, hydrolyzing O-glycosyl compounds; C:membrane			MVDMNQLSVRYAHHLVVSAWRRKSLMIMAVMVTFLLIICLQYSSVGGHSENSSKNIFENRQDFPLGLQGSKEHQEVPPRRNLSGLASLSKDNRPDSLADSLSGSVIRQPQLLHDDTALQIAKELPNGDNIPMHLEDQQKRSDHLFGNMAHSKGDMNSRNWQGQNIAQFKVDKQPYIPGYRLVHLDMKGAPPKLSYLKQLFPILKEAGSNGIILEYEDMFPFWGPLSSFAAGNAYSKDDIKAILKLAKSYKFEVIPLVQTFGHMEFVLKLEEFRHLREVDEFPQSVCPSRNESASLIESMIDQVLMMHPKTKWLHIGCDEVYHLGYCDKCAHYDRDTLFLKHVAKIATYVRQKHNVIPIIWDDMLRNIPTETLKEFRLGSLLEPMIWTYVKDIYRFVPYS…	0	4	2 (2)	3	314820	0	3	1 (1)	1
Tt_049572-T1	Roe1	grpE homolog mitochondrial-like	233	26	F:GO:0005488	F:binding			MAATVSSCISLARRFYSLAPRFSKNILYGSSRSSSVRICSTTASSEKTSPKEKPPEGGDPVEANQHAAEAPVNPLEEENKKLIEKIKEIDDKYKRALAENENLRQRMRKQIEEAKQFGIQNFCKDLLDIADVLSKAVESVPQDSLTSENPNLKNLYEGLKMTEAQLQNVFKRHGLNQINPQGEKFNPNQHEALFQQQDPSKEPGTVFIVTKIGYKLNERTIRPALVGVVQGSA	0	15	3 (3)	6	1.06255e+06	0	18	3 (3)	4	842447
Tt_049685-T1	Rox8	nucleolysin TIAR-like isoform X5	416	46.3					EMKVNWATSPGNTPKQDTSKHHHIFVGDLSPEIETAQLREAFTPFGEISDCRVVRDPQTLKSKGYGFVSFVKKADAEVAISQMNGQWLGTRAIRTNWATRKVSANRSQFEGNSQALSFDEVYAQSSPTNCTVYCGGISQGLSDELIHRTFISFGPIQEIRVFKDKGYAFIRFGTKEAATHAIVGTHNSEINGQVVKCSWGKESSDPAIQQPAQQNLTTPYSYPYQQMGYWYPQGYPQMQGQFMQYPYGQYYGQGFGMGAQMAWQGNPGQSQMAAAATQSLIGQQAGVIGAYPMQQYQITTYLSGNGVQARGTLQIIAFLTGCGGSLTKVRTNSIGQCFFELIMSDTEEHVNGVVLNEQRSETHYVNDLCPEVEQDPVIQQDMCPDKVELDPKDIERRKK…	0	9	3 (3)	6	424928	0	3	1 (1)	1	252388
Tt_049737-T1	Jafrac1	peroxiredoxin 1-like	197	22.1	C:GO:0005623; P:GO:0045454; F:GO:0051920; P:GO:0055114; P:GO:0098869	C:cell; P:cell redox homeostasis; F:peroxiredoxin activity; P:oxidation-reduction process; P:cellular oxidant detoxification	EC:1.11.1.15	Peroxiredoxin	MTGNLPALTKPAPDFSGTAIIDGEFREIKLSDYKGKYLVLFFYPLDFTFVCPTEIISFSDRVEEFKNIGCEVVACSTDSHFSHLAWVNTPRKEGGLGNMKIPLLADKSLDIARNYGVLKEDEGIAFRGLFIIDEHQKLRQITVNDLPVGRSVDETLRLVQAFQFTDKHGEVCPAGWKPGDDTMKPNPVESKEYFSKQ	0	11	2 (1)	6	641161	0	23	5 (4)	7	3.06006e+06
Tt_049743-T1		tyrosine- phosphatase Lar-	283	31.7					MNFWRFTIGYKVYFTTRPKLPTTDWNTQNIDNGTLAIISDVTPETIYTIRIQALTGTGSGPLSDSVQVETQEGVPSQPLNLLVKFTSSTTVELEWSHPEHSMPDEPMNVKVEPISSTSLQVQWKRPANKDKNGLIRGYQIHIQERDENNGSVGAAIRFDVTNEVEEAYNVTGLRPDTTYTVQVATVTWKGDGIHSHPRTSKTKRGGETLEVSYTLTIAVKPELNPSVILEISQLIVEVCAPGSSSLLYTSRTYLQSNARVEPEPNLCGRRFSRAVCQVEKWFF	0	8	2 (2)	5	497551	0	20	3 (2)	5	2.62032e+06
Tt_049744-T1		tyrosine- phosphatase Lar-	149	16.7					MSNLYPDILYHIWLAARSKHGEGAPTQPVTVKTDQYPNKDKNGLIRGYQIHIQERDENNGSVGVAIRFDVNNEVEEAYNVTGLRPDTTYTVQVATVTWKGDGIRSHPRTAKTKRGGETLEVFYTLTIAVKPELNPSVILEVSQLIVEVW	0.002	9	1 (1)	1		0	15	2 (1)	5	903261
Tt_049822-T1		sorting nexin-3-like	176	20.8	F:GO:0035091	F:phosphatidylinositol binding			MNMSIYQFINMASEGNLPHEATRRLQPKKQTLDDAYAAPANFLEIDVFEPFTHGVARKRYTDYEVRMRTNLPVFKLKESSVRRRYSDFEWLRTELERDSKIVVPPLPGKAWKRQLPFRTDEGIYDEEFIEERRKGLEMFINKVAGHPLAQNERCLHMFLQEPVIDKNYVPGKIRNS	0	26	5 (1)	12	2.15807e+06	0	28	5 (1)	7	3.30362e+06
Tt_049848-T1	FAU	ubiquitin FUBI	132	14.8	F:GO:0003735; C:GO:0005840; P:GO:0006412	F:structural constituent of ribosome; C:ribosome; P:translation			MQLFLIGQETHNVEAPENQNVGFLKEWIKQAENISPADQVLYHGGRPLEDEQLLSDCLVNGSSVVVSVRLLGGKVHGSLARAGKVKGQTPKVEKQEKKKAKTGRAKRRMQYNRRFVNVVQTFGRRRGPNSNQ	0.002	8	1 (1)	3	905591	0	8	1 (1)	1	379902
Tt_049927-T1		IST1 homolog	361	40.4	P:GO:0015031	P:protein transport			MFSTGPNYSKLKTNLRLAINRLKLLEKKKTELAQKARKEIADYITSGKYERAKIRVEHIIREDYLVEAMEVVEMYCDLLLARFGLIQQMKSLDEGLAEAISSLLWVTPRLQTDVAELKVISDQLTSKYGKPYTQAACENSLNSVNEKLVHKLSVQAPSRLLVEKYLIEIAKSHDVPYEPDLDVMKEEEAMAEEANQSNLIHFDSDSSGPNYPSGGGMNYPPMQYPANQPAPPPFQYPSAQIKNPNAAPPLPNVPPSRPYPSLNTPIGFNMPPNIDFTPAPPYDSVVSSKPEKVNEQKDIDEKVKPEPTPRTKFPIDTLPELPSVPTDSLPNMDTSLNAKAGNDSVDFDDLAKRFDELKKRK	0	4	1 (1)	2	353628	0	6	2 (2)	6	749887
Tt_050204-T1		carcinolectin-5C	299	34.2					MYNPLLKLCILNFFLVSQATHHSETACSTIGSLDGVIESLSSTVSELTELAKQKISIIEAPICSEHDFLTKITKEKTVKTSLPKDCSTIYKQGNRTSGIYEVWPQFLNHHVPVFCDMDTAGGGWTLLQRRGDFGEPVENFFRTWASYKSGFGNLSREFWLGNDVIFALTNQDNMLLRIDLEDFEGSRKYAEADEFLVKSERELYKMSFKTYKGDAGDSLTEHRNMPFSTKDSDNDKWGKNCAEVYKGGWWYNACHHSNLNGLYLRGANERKGAGVNWYQWRGHEYSLKISEMKIRPVEF	0	53	16 (16)	93	5.51006e+07	0	65	20 (20)	261	7.89048e+08
Tt_050455-T1	RpL30	60S ribosomal L30	113	12.6	F:GO:0003723; F:GO:0003735; C:GO:0022625	F:RNA binding; F:structural constituent of ribosome; C:cytosolic large ribosomal subunit			MVAQKKQKKTIESINSRLALVMKSGKYVLGYKQTLKTLRQGKAKLVIIANNTPPLRKSEIEYYAMLAKTGVHHYSGNNIELGTACGKYFRVCALSITDPGDSDIIRSMPTDQQ	0	67	7 (7)	27	1.1793e+07	0	26	3 (3)	3	2.77169e+06
Tt_050480-T1		40S ribosomal S28	64	7.3	F:GO:0003735; C:GO:0005840; P:GO:0006412	F:structural constituent of ribosome; C:ribosome; P:translation			MDKPRLARVTKVLGRTGSQGQCTQVRVEFLDESNRSIIRNVKGPVREGDILNLLESEREARRLR	0	33	2 (2)	5	2.96315e+06	0	19	1 (1)	1	76116.2
Tt_050553-T1		C-reactive -like	249	28					MASVFQLFLISCIFGGVFVSSMMTLRHGYLATKVRFFHSDSSIPRLVMIGTLPRVRDLTLAYWVKLYQFGEYSNSIFSYAHPKENNELYTWIQLKDKIPHVGIHIHSGEGHFINIPCPEFVLRKWQHVTYTWSSQSGNVNAYLNGKLCTNITATVSRGVEVRPGGMIVLGADQDSVGGGFKVKETLEGELTDLHLWDETLDEDQISVFSASTCRTEGGLEFHGNLIDWSNSAFRAFDGVSFHPTTLCLR	0.002	4	1 (1)	2	661328	0	67	12 (12)	43	7.35425e+07
Tt_050559-T1	TER94	Transitional endoplasmic reticulum ATPase	805	89.3	F:GO:0005524; F:GO:0016787	F:ATP binding; F:hydrolase activity			MAENKTNPEELATAILKTKHKPNRLLVEEAINDDNSVISLSQAKMDELQLFRGDTVLLKGKKRKETVCIVLSDDTCSNEKIRMNRCIRHNLRVRLGDVVSIQACPDVKYGKRIHVLPIDDTVEGLTGSLFDVYLKPYFLEAYRPIYKGDVFSVRGGMRAVEFKVVETDPSPYCIVAPDTVIHCEGEPIKREEEEESLNAVGYDDVGGCRKQLAQIKEMVELPLRHPSLFKAIGVKPPRGILLYGPPGTGKTLIARAVANETGAFFFLINGPEIMSKLAGESESNLRKAFEEAEKNSPSIIFIDELDAIAPKREKTHGEVERRIVSQLLTLMDGLKQRSHVIVMAATNRPNSVDAALRRFGRFDREVDIGIPDTTGRLEILCIHTKNMKLDDDVDLEKIA…	0	7	5 (1)	11	157985	0	8	5 (2)	7	55154.8
Tt_050950-T1		---NA---	105	12.7					MQLSIGSLQMMARSTRAVKEDQASSSSFQWDMWIEWYRPQQVYQNYRVIVKLKNQISTSTSVEKRKKMEMATVRRQHQGESRENKQWWYNKETVSYGFQGYVKLK	0.009	6	1 (1)	8	2.10287e+06	0.01	6	1 (1)	8	5.57912e+07
Tt_050959-T1	Eno	enolase	357	38.5					MPVTNIIARQIFDSRGNPTVEVDVTTDRGLFRAAVPSGASTGIHEALELRDGDKGAYHGKGVSKAVEHVNTVIAPAVLAKNFEPAQQTDIDDFMISLDGTANKSKLGANAILGVSLAMCKAGAAQKNVPLYRHIADLAGNTDIILPVPAFNVINGGSHAGNKLAMQEFMILPTGANSFTEAMKMGTEVYHHLKNVIKKRYGLAATGVGDEGGFAPDIQNNKEALELIKEAIEIAGYTGKIEIGMDVAASEFYKDGKYDLDFKNSNSNPSDWLTPEALTALYQEFIQDYPVVSIEDPFDQDHWDAWTSFTKSTNIQIVGDDLTVTNPKRIQTALEKKACNCLLLKVNQIGSVTESIRA	0	15	4 (3)	20	4.62421e+06	0	32	8 (5)	16	4.92546e+06
Tt_050962-T1	Eno	enolase	163	18.1	C:GO:0000015; F:GO:0000287; F:GO:0004634; P:GO:0006096	C:phosphopyruvate hydratase complex; F:magnesium ion binding; F:phosphopyruvate hydratase activity; P:glycolytic process	EC:4.2.1.11	Phosphopyruvate hydratase	MAPCDNHFECGASRYWVRGGIHSYVISVCQPISACTDGYFSFSKRHRNTNAIIHKMEKRGLVHQIVLFLANLKGLKLCIKNLGKSVVHKLAKSNGWGTMVSHRSGETEDHSIADLVVGLSTGQIKTGAPCRSERLAKYNQILRIEEQLGCSAKYAGNNFRQPI	0	30	4 (3)	14	1.89179e+06	0	24	3 (2)	5	636772
Tt_050997-T1		leucine-rich repeat neuronal 3-like	377	42.6					MKLITSVLLMASLVNRGTAGSSCPPKEYLSPWFCIKTSSSIQNSYTIVVCNRPDCKDHLRKVNGAAGHLVLDKVILSDITSNDTEKDWSLKLPSQWLLVSRVRELEIRDTTLSDCFLCNNPFQGQDQYLKKLAFSNCSLKGNLCNECTTTIKTLVRTTTTTTRKPRRYGFYHENTDLTNSQPKYEYTKITKGIRINGLKNAKSLESLDLSFNAIEKISSDAFPSELSRLKILVLSHNNISMISSAAFTPLTSLSELDLSYNKLENLSRNIFDSPDTKLEVLNLKWNRISVLQENFFSLMLALREVNIAHNFLQYIPAATWNQELSVIRKIDFSGNFLICDCDIKWILANDTEITGLCRAPWEFAYQPVVRAAATLIC	0	13	5 (5)	17	4.49675e+06	0	37	13 (13)	85	2.38904e+08
Tt_051045-T1		EF-hand domain-containing D2 homolog	198	23.2					MADSELAQKLARRQAFNEREEGSPVPESTLRQVFNPYTEFPEFSRKEIKEYEKTFKKYDIGADGFIDFEELKRMMESVGAPQTHLALKEMIQEVDEDQDKKISFREFLLIFRKAQTGDLAADSGLNQLAKLTEIDVDQAGVSGARNFFEAKIEQQKKHNQFEEEIRSEQEERRQEEEQRKQRKAAFREKTNVFSQAQA	0.002	8	1 (1)	2	2.3749e+06	0	8	1 (1)	1
Tt_051201-T1	AP-50	AP-2 complex subunit mu	435	49.8	P:GO:0006886; F:GO:0008289; P:GO:0016192; C:GO:0030131	P:intracellular protein transport; F:lipid binding; P:vesicle-mediated transport; C:clathrin adaptor complex			MIGGLFIYNHKGEVLISRVFRDDIGRNAVDAFRVNIIHARHQVKSPVTNIARTSYFHIKRANIWLAAVTRQNVNASMVFQFLHKTVEVMQSYFGKITEDNVKNNFVLVYELLDEILDFGYPQNTDTGILKTYITQQGVKSQSKEEQSQITSQVTGQIGWRREGIKYRRNELFLDVLEYVNLLMSPQGQVLSAYVAGKVMMKSYLSGMPECKFGVNDKITVDTVNKGVPIAEPSQNSSKSAIAIDDCQFHQCVKLSKFESEHSISFIPPDGEFELMRYRITKDINFPFRIIPLVHEIGRSRMDVKIVLKSNFKPSLISQKIEIKIPTPLNTSGVNVICMKGKAKYKASENAIVWKIKRMLGMKETQLSAEITLLQTDTKKKWNRPPILMNFEVPFAPSGF…	0.009	2	1 (1)	1		0.007	2	1 (1)	1
Tt_051203-T1	RpL22	60S ribosomal L22-like	136	15.8	F:GO:0003735; C:GO:0005840; P:GO:0006412	F:structural constituent of ribosome; C:ribosome; P:translation			MAVVGNIKKKNIKNLQKGKGKKKKTQLKFSVDCSHPVEDGIMDVDSFEKYLKERIKVNGKTSNLGNVVTIEKSKSKILITADIQFSKRYLKYLTKKYLKKNSLRDWLRVVAASKDSYELRYFQINNEEEEDEEDNE	0	9	1 (1)	6	2.7209e+06	0	9	1 (1)	2
Tt_051402-T1		legumain-like	532	60.1	P:GO:0006508; F:GO:0008233	P:proteolysis; F:peptidase activity			MIQLNSNRIRPPLIANSSNTAPINLSYTSALSNSKFNWHKPKPLSDFVYGQPDSSKIWAVLVAGSDSWYNYRHQADICHAYQILHSHGVPDEHIIVFMKDDLARNTENPTPGKIINKPSGPDVYQGVLKDYTGKDVTPQNFLNVLQGNEKAMKGVGSGKVLKSGPNDHVFVNFADHGAPGIIAFPSDVLKATDLNNAIKNMNDKKMYGKMVFYIEACESGSMFKNLLSDNINVFATTAANDRESSYACYYDEERRTYLGDVYSVKWMEDSDQEQLAKETLQEQFSIVKTETNTSHVQEYGDLTIGKMHVGEFQGRKSVSVNYSPKIPLDAVPSEDVPLAIHQKQLAKAGVEEKPRLQKEYNRLIQNRNFLRSRMMELIMLLSHEEDVMNIWNERSELTE…	0	7	2 (2)	7	1.39076e+06	0	16	6 (6)	12	3.61581e+06
Tt_051499-T1		uncharacterized protein LOC111085177	175	20					MKKWLYAILLFAFTGYTVANLVNIKDCGGIIRFNCSSLQNCPVQFNLERCNNPNRCVLERQTKYNINVRFQWGDDRSRTYRMKRVMTGVISSMFGNIDVDYETVKACISPEDSRNSCRRQVTFRPGSWYTSVDKFNVPGIGYAGMELGAKYQLVTKDSGGNRITLLCAFLKLKLA	0	57	11 (8)	126	1.59432e+08	0	46	8 (6)	55	4.68825e+07
Tt_051594-T1		3 (2 ),5 -bisphosphate nucleotidase 1-like isoform X1	314	34.3	P:GO:0046854	P:phosphatidylinositol phosphorylation			MAASSSAAPVLLRILSASVSVVNRAGKIIKDVMKKGDLGIVDKGIDDLQTEADRSVQHCIVTSLSRQFPKIAIIGEEELDSEEKVLDEWIVTSLDSDVLAKKCPADLASVPEEKVVVWVDPLDGTSEYTQGLLDHVTVLVGIAVNGKAIGGVIHQPYYNYQIEKDVYKQGRTLWGMNGLGVFGIEKKAPCEGKRIITTTRSHSNKNVNLTIDAMKPDEVLRVGGAGHKVLLLIEGRAHAYVFASKGCKKWDTCAPEALLHILGGKLTDMHGNSLEYHKDIQHLNSGGVLATYDAAVHEWYRERVPEEVKKSLPP	0.008	3	1 (1)	1		0	28	6 (6)	10	5.96892e+06
Tt_051776-T1	NPTX2	C-reactive -like	242	27.3	C:GO:0005576; F:GO:0046872	C:extracellular region; F:metal ion binding			MISEHLSFYKVAIIFTLVWLPSTSLKEGEISSCVVFPSSTTTSFPRLVMAGTLPTLQELTLCYWFKIHRLDKRLHIFSYAHDAQSNEILTYVDVDNTIGFFISGTPELQIQCPHYLMIGKWHHVCYVWSSWEGEATLVVDSFGCHGNKTGMHKGGKVRPGGALVLGQDQDKVGGGFDPKQNMKGELSEVHLWDSTLNSEQISRLSKCTDISQRSLYGNLIRWEKTPFRFYDGVLLSLNNICA	0	24	4 (4)	14	1.36785e+07	0	21	4 (4)	20	3.09626e+07
Tt_051908-T1		calpain-A-like isoform X2	767	89					MACSSSHDYIFKLGERGSGLQARRIQDFHKLREQCVAEGTLFEDTEFPACDSSIFFTSTPSRPFEWKRPHELAEEPKLFHEGATRFDVVQGELGDCWLLAAMANLTLNQALLYRVVPYDQGFEDDYAGIFHFRFWQYGRWIDVVVDDRLPTCNDTLVFMHSKEQNEFWSALLEKAYAKLHGSYEALKGGTTCEAMEDFTGGVTEFYEIQKAPDNLFRIMLKAYERWSLMGCAIKPDSDVTEMEQDNGLIKGHAYSITAVRMVEVDTPRVSGKIPLIRIRNPWGNECEWKGAWSDSSPEWTMVDENERKELGLTFEHDGEFWMSFRDFLLNFNMLEICNLNPDSLDDEPLTQVSKKKWNMHVFESSWIPGCTAGGCRNYPDTFWMNPQYQVTLEDVDDDD…	0.004	1	1 (1)	1	1.31607e+06	0.003	1	1 (1)	1	421402
Tt_051938-T1		uncharacterized protein LOC111085177	175	19.7					MKKWLSVLSLFAFAGYTIANLVNIQDCGGIIRFNCSSLQNCPVQFDLERCNNPRRCIVERGTKYHINVRFQWGDDRSRTYKVKRVMTGVVSSLFGNIDVDYETVKACISPEDSTNSCRRQVTFRPGSWYTSIDKFNVPGIGYAGMELGAKYQLVTKGSGGNRITLLCTFLQLKLA	0	23	4 (2)	33	1.53427e+07	0	52	10 (8)	51	1.41593e+08
Tt_051973-T1	RAB1A	ras-related Rab-1A	206	22.9					MSTMNPEYDYLFKLLLIGDSGVGKSCLLLRFADDTYTESYISTIGVDFKIRTIELDGKTIKLQIWDTAGQERFRTITSSYYRGAHGIIVVYDVTDQESFNNVKQWLQEIDRYACENVNKLLVGNKCDLTTKKVVDYTTAKEFADQLGIPFLETSAKNATNVEQAFMTMAAEIKNRMGPPTSGGEAIRPGDKINPSTPVKPQGSGCC	0	16	2 (2)	6	677339	0	60	9 (8)	13	9.96153e+06
Tt_052220-T1	H3F3A	histone	136	15.3	C:GO:0000786; F:GO:0003677; C:GO:0005634; F:GO:0046982	C:nucleosome; F:DNA binding; C:nucleus; F:protein heterodimerization activity			MARTKQTARKSTGGKAPRKQLATKAARKSAPSTGGVKKPHRYRPGTVALREIRRYQKSTELLIRKLPFQRLVREIAQDFKTDLRFQSAAIGALQEASEAYLVGLFEDTNLCAIHAKRVTIMPKDIQLARRIRGERA	0	65	10 (3)	166	4.5155e+06	0	51	6 (2)	66	3.24072e+06
Tt_052243-T1	FUCA1	alpha-L-fucosidase-like isoform X1	456	52.7	F:GO:0004560; P:GO:0006004	F:alpha-L-fucosidase activity; P:fucose metabolic process	EC:3.2.1.51	Alpha-L-fucosidase	MNYKVGLFAISFMSTFILGSGKYEPNWDSIDSRPLPSWYDESKIGIFLHWGLFSVPSFGSEWFWAYWKLSKSKDYVEFMEKNFKPNFTYQDFGPSFTCEFYDPENWANIFNASGARYVVLTSKHHEGFTLWPSNVSWNWNAMDIGPKRDLLGDLANAIRKKTNLHFGVYHSLYEWFNPLYIYDKSNKWKTQHFVETKTMPELLELVNHYQPDVIWSDGDWEAPDTYWKSKDFLAWLYNDSPVKDTVVVNDRWGSGIPCHHGGYFTCQDRYNPGKLQNRKWENAMTIDKASWGYRRSAKIHDYVTMEELVATLAETVSCGGNILINVGPTHDGRITPVFEERLRNLGKWLEVNGEAVYGSRPWNYQNDTVTPNVWYTKNLATSIVYAIVLDWPKNDKLFL…	0	8	4 (4)	8	1.41623e+06	0	9	4 (4)	8	2.23114e+06
Tt_052287-T1	Sop2	actin-related 2 3 complex subunit 1A-like	167	19.3					MTEIHSFGLEPIMCHAWNKDRTQLALSPNNNEVHIFRREGDKWVQTDVLSQHDLRVTSIDWAPNTNRIVTCSADRNAYVWTQVDGKWKPMLVLLRINRAATCVRWSPQENKFAVGSGARLISVCYFEEENDWWVSKHIKKPIRSTVTSIDWHPNNILLACGSTDFKA	0.023	10	1 (1)	1	875204	0	28	4 (4)	7	3.41469e+06
Tt_052359-T1		lethal(2)essential for life-like	179	20.5					MAFSRGLIPALFGRDWWESGDFPSRIADQHFGLGVHDSDIFTPTLYHGYYRRPRRQVSRQSRGGHSQVKNEADKFQVLLDVSHFAPNEINVKTVENFVVIEGKHEEKPDEHGLISRQFVRRYMLPKEVDPETVQSSLSSDGILTVEAPKKALEGEQPNERVVQIQMSDKPALKEDKEEQ	0	65	8 (5)	52	4.01173e+06	0	51	7 (4)	23	3.86881e+06
Tt_052360-T1		lethal(2)essential for life-like	175	20					MAFSRSLIPTLLGQDWWDTWNYPTRIPDQYFGLGLHDSDICTPSTYIYYRQPRRQVSSKAGSGVSQVKNEADKFQVSLDVSHFAPDEINVKTVENFVVIEGKHEEKPDEHGFVSRQFVRRYMLPKEVDPQTVKSSLSSEGILTIEAPKKALEGQQPNERVVQIQMTDRPALKEGQ	0	51	10 (9)	52	2.39046e+07	0	52	10 (7)	33	2.94277e+07
Tt_052361-T1		lethal(2)essential for life-like	179	20.6					MAFSRSLIPTLLGRDLYDPWDFPVRIPDRHFGFGLHDSDIFTPAMYRIYYKQPRRQVSRNTSSGVSQVKNEADKFQVLLDVSHFEPNEINVKTVENCVVIEGKHEEKPDEHGFISRQFVRRYMLPKEVDPETVQSSLSSDGILTVEAPKKALEGKQPNERTVQIQMSDKPALKESKEEQ	0	77	14 (12)	86	3.84621e+07	0	70	10 (7)	37	3.56675e+07
Tt_052362-T1		lethal(2)essential for life-like	179	20.4					MAFSRSLIPALLGQDWWDTWDFPTCLADQHFGRGLCDSDVLPPTLYHSYYVRPRRQISREAGRGVSQVKNEADKFQVLLDVSHFKPDELNVKTVENCVVIEGKHEEKPDEHGFISRQFVRRYMLPKEVDPETVQSSLSSDGILTVEAPKKALEGQQPNERVVQVQMSDKPALKQGKEEQ	0	39	6 (1)	27		0	46	7 (2)	26	3.253e+06
Tt_052451-T1		T-complex 1 subunit	545	59.2	F:GO:0005524; C:GO:0005737; P:GO:0006457; F:GO:0051082	F:ATP binding; C:cytoplasm; P:protein folding; F:unfolded protein binding			MALHVPKPPGFSQMLKEGARHFHGLEEAVFRNIEACIQLTRTVRSAYGPRGMNKMIINHLEKLFVTSDAATIIRELEVQHPAAKMIVLASQMQEQEVGDGTNFVIILAGALLEHAEELIRMGLTPVEVAEGYEMAGQKILDLLPTLTCGKIKDYKNVDEVARGIRAAVMSKQFGNEDFLAQLIAKACISILPEKSSFNVDNVRVCKILGAGVYKSEVVQGMVFKRQIESNVTKATSVKVAVYTCPIDSVQTETKGTVLINTAEELMNFSRGEETLLEKQIKAIADVGVSVVVAGGKIGDMALHYLNKYGLMGVRLMSKFDVRRLCRTVGATALPKMTAPTPEEAGFCDLVYVDEIGETPVVVFKQESKESRISTIVVRGSTDNLMDDIERAIDDGVNTF…	0	11	5 (5)	10	909838	0	5	2 (2)	4	389189
Tt_052514-T1	Clic	chloride intracellular channel exc-4-like	216	25.1					MDLYLLAELKTISLKVTTVDMLKPPPDFRSNFDSTPPPILIDRGNPVLENDKIERYIMKSVPGGYNLFVQDKETETVIMDLYSKFKLVLNKGGDQRKRALLNQLRNIDTHLSKTEGRFLTGDTMCCFDCELMPRLQHIRVAGKYFVDFEIPEDMSNLWQYMYHMYQLDAFTQSCPADQDIINHYKLQQGTKMKKHEELETPTYTTSIPPTVEINGH	0.002	6	1 (1)	1		0	6	1 (1)	1
Tt_052588-T1	ACAT1	acetyl- mitochondrial-like	849	90.1	F:GO:0016746	F:transferase activity, transferring acyl groups			MGIPKDAIQETYMGNVYQAGVGQNPARQAALGAGLSTSTPCTTVNKVCASGMKAIAFAAQNLMVGHQEVMVAGGMESISNVPYYLPRANPPFGNNTLIDGCMYDGLTDVYNGVSMGVCSEKAAKAYNISRQEQDEYAISSYKKSIAAFEAGVFEKEIVHVVIPGKKGKPDTKVKQDEEFTNCNIEKLGKLPPAFQKDGTITLANSGKLSDGGAACVLMTEQAMEKFKVKPLAKIIGFADAAVDPMDFPVAPAQAVHKLLATAGIKTEDVALWEINEAFSVVAIVNIKLLGLNPAKVNPNGGSVSLGHPFGMSGARLVNCLALNLKPGEYGVATACNGGGGAGAILVYPFRSFSKCTSKMLARTLASGGGFKEVFIVSAARTPVGAYRGSLVSLTAPRLG…	0	1	1 (1)	2	829335	0	7	3 (3)	3	2.68323e+06
Tt_052675-T1		SH3 domain-binding glutamic acid-rich homolog	171	19.4					MVIKVFISGISASKEVKKHQQRVFMILDSLKLNYETIDITEPGKEDQRTYMRENCKKGAGGGVLPPQFFNDEDYLGDYDDFELANEDDELMKFLKLEDQVPKEDITSSETKFQATEPENTDELIFQNGTGSREASESKEVSESSKTEVTEEETVSEENQAATEEEPETKEA	0.002	10	1 (1)	1	139642	0	44	5 (5)	14	5.26188e+06
Tt_052773-T1		uncharacterized protein LOC106459489	235	27.4					MNKNRSEKAVVMTTLSFMLTCQLVGAKLSKFDLLYDSPTEQHLRPRTFFLTASQERKVVSDVLCEGKDCPEFHVINDYNNFIQERIYRKTKLLTVPLQKSCDFIGTIRTANESLEEYRKGWNERNRKFYSVAPLLIQINHSPLIKSHDPWCKMAFAVKMYVPQYLGIPPTPINKSLSFGSLPDAFHVYVHTFTGYLKSRMLMELEVFRSSLDNLMFCYNQERFYLGKISVYCLGT	0	34	6 (6)	26	1.61329e+07	0	47	8 (8)	27	2.24946e+07
Tt_052848-T1	Moe	moesin ezrin radixin homolog 1-like	572	68.1					MPKAVNVRVTTMDAELEFAVQPNTTGKQLFDQVVKTIGLREIWFFGLQYTDNKEFQTWLKLNKKMLNQDVKKENPLQFKFRAKFFPEDVAEEIIQDITLRLFYLQVKNGILNDEIYCPPETSVLLASYAVQAKYGDYNSSNYSPGMLANDRLLPQRVLDQHKLSKEMWEERITNWWMEHKAMPKEDAMMEYLKIAQDLEMYGVNYFEIKNKKGSELWLGVDALGLNIYEKDDKLTPKIGFPWSEIRNISFNDRKFVIKPIDKKAPDFVFFTPRLRINKRILALCMGNHELYMRRRKPDTIEVQQMKAQAREERLAKQQEREKLLKEIEAREMAERKQQEYAERLKHMQEDMERRQRELAEAQDTIRRLEEQLLQLQAAKDELELKQKELEEMMHKLQED…	0	3	2 (2)	2	1.65209e+06	0	15	8 (1)	19	804261
Tt_052983-T1	Cctgamma	T-complex 1 subunit gamma	550	61	F:GO:0005524; C:GO:0005737; P:GO:0006457; F:GO:0051082	F:ATP binding; C:cytoplasm; P:protein folding; F:unfolded protein binding			MFERGSGPILVLSQNTKRESGRKVQLENVQAAKAIADIIRTCLGPRAMLKMLMDPMGGIVMTNDGNAILREITVQHPAAKSMIEISRTQDEEIGDGTTSVIILAGELLSVAAPFLEQNIHPTVIIKAYRQALEDLVEILQEVSLPVDINNQEQMTNIIKSCIGTKFIGKWGNLACQIALDAVKTVFIEENGRREIDIKRYAKVEKIPGGTIEESEVLNGVMINKDVTHQKMKRCIENPRIILLDCPLEYKKGESMTNLELSKEEDFSRILELEEEYIQQICSDIIRFKPDVVFTEKGISDLAQHFLVKAGISAIRRVRKTDNNRIARSCGATIVNRTDELKEDDVGTEAGLFEIKKIGDEYFCFVTECKNPKACTILLRGASKDILHEVERNLQDAMSV…	0	7	4 (4)	7	1.26222e+06	0	6	2 (2)	3	198809
Tt_053039-T1	rump	myelin expression factor 2-like	530	57	F:GO:0003676; F:GO:0003723	F:nucleic acid binding; F:RNA binding			MDEEGGYGGNGTSSPDNTYDQRSRSRSPVERNKERDRKDYSRDRGCDRRQQRLSGFRRVYVANIPYDSKWTDIKDLFREQVGDVSYVELFNDENGKFRGCGIVEMKDETAAQKAIDLLHRYEYKGRSLVVKADDDVERDRYGRPLKGTRERTVSLNSSFGGGMDVVLGGMGSGTSSQFNTYGLSPQFLRSLGIDGPLCNRVFVSNLEYKVTEDKLQEIFKLAGKVIKVDLKKDKDGGSRGCCVISYEHPAEAVQALSMFNNQKLYSRTMSVRMDKMNDEYDGLPSKLPDGLQGIGKGLGSSGQPLNITSLVTAANLGAAVLGGGLGIMGMNSMNAGVGNMGTGMGGVGMGMNSGNLNNMIASQSVGGVGGLNAAMQMGVTGDQGMMSPGMGGGLSGVMG…	0	5	2 (2)	3	111018	0	3	1 (1)	1
Tt_053198-T1		talin-2-like isoform X2	2558	274.6	C:GO:0001726; F:GO:0005200; C:GO:0005623; C:GO:0005856; C:GO:0005925; P:GO:0006897; P:GO:0007016; P:GO:0007155; F:GO:0030276; F:GO:0051015	C:ruffle; F:structural constituent of cytoskeleton; C:cell; C:cytoskeleton; C:focal adhesion; P:endocytosis; P:cytoskeletal anchoring at plasma membrane; P:cell adhesion; F:clathrin binding; F:actin filament binding			MANLSLKISVFEKNVVKTMKFKPSMLVFDACRNIREKISEANQGESKDYGLFLPDEDPKKGVWLESGRTLEHYLLRDGDLLEYKKKMRTLRVRMLDESIKTLRVDDSQPVANLMVVICTKIGITNHDEFSLVRDLAEEPVKDASTTGTLTLRKDKKDKERDQKMEQLKKKLKTDDDLNWVDHSKTLREQGINEDETLLLRRKFFFSDQNVDSRDPVQLNLLYVQARDAILNGTHPVTIEQASKFAGIQCQIQFGDHSEQKHRAGFLDIKEFLPKDYWKVKVIEKKIFTEHKTCLGMSELEAKVKYVSLARSLRTYGVTFFLVKEKMKGKNKLTPRLLGVTKDSVLRLDEKTKEILKTWPLTTVRRWAASPNSFTLDFGDYSDSYYSVQTTEGEHISQLI…	0	12	20 (20)	56	9.03259e+06	0	38	69 (63)	113	3.74356e+07
Tt_053226-T1	Nacalpha	nascent polypeptide-associated complex subunit alpha-like	221	24					MPELSVVDVETAQEKVVKTNDSAHESGTDSDSEDSVPELEEPETSGTQSTSQEQMAEAAGITEEMVSKAKQSRSEKKARKVMSKLGLKEVSGVSRVTVRKSRNILFVITKPSVYKSPASDTYIVFGEAKIEDLSQQAQMAAAEKFKTPEPGLAVGEPTRAAISQPIEEESEEDDEEVDEAGVESKDIELVMSQANVSRTKAVRALKNNNNDIVNAIMELTM	0.002	6	1 (1)	3		0	19	3 (3)	6	1.34224e+06
Tt_053257-T1	PSIP1	PC4 and SFRS1-interacting -like isoform X1	603	68.3					MSEKMQYKPGDLVFAKVRGYPPWPARVEEKPPPGKKVPPKKFPILFFGTYETANLGTKDLYPYHKFKEKYGNPQKRKFFNEGLWEIENNPTIIPPSQMPIEPDNNELETGASLKEPPGGMERNFDTEEELNDDKSVPSNKKRKAEYKEEEIKKSKFDVEGDQLSDTGHKVARKKTKEKDEKRRDPLETAVGEQSSSKRKIKRKRVGSESESDTEKESVEQNMPSLTVTIIPIEKAVAEQENSAKEEGKPGKIKKIKEAKSKKESGIEKSDDQGKKTVVEVAEDPQQESKDFDWTRKKKEEYWTKHVDEGNDKGRHKKEAKKKKKKKHKEKKAKHKQHKCSKRARVSTSTASSIRSSDDETDEKICQPGKHVQKKEDVQLGDDDINTTQIVLKNADDGTD…	0.002	3	1 (1)	1		0	3	1 (1)	2
Tt_053285-T1		proteasome subunit alpha type-4-like	259	29	F:GO:0004298; C:GO:0005634; C:GO:0005737; P:GO:0006511; C:GO:0019773	F:threonine-type endopeptidase activity; C:nucleus; C:cytoplasm; P:ubiquitin-dependent protein catabolic process; C:proteasome core complex, alpha-subunit complex	EC:3.4.25	Acting on peptide bonds (peptidases)	MARRYDSRTTIFSPEGRLYQVEYAMEAIGHAGTCLGILASDGIVLAAERRNTNKLLDEVFSAEKIYKLHDDMACSVAGITSDANVLTNELRQIAQRYLLQFGESIPCERLVSWLCDLKQAYTQYGGKRPFGVSILYMGWDKQFGYQLYQSDPSGNYGGWKATCIGNNSAAAVSILKQEYKEGKTTLKDALALAIKVFSKTLDMTKLTSDKLEMATLTRENGKTKIRILNQNDVQPLIKQHEEEEAKAEAAKKEKEKSKS	0	5	2 (2)	8	1.89136e+06	0	22	5 (5)	6	1475344
Tt_053390-T2	Aats-thr	threonine--tRNA cytoplasmic-like isoform X2	721	83.7					MIYRFKLFCVFERLRSPNIFHHRSRTVKSFKTVKSKQRKEMTEHKSSELNPWPSYIQDRIELWNQYRAKYEDQLAQKRSERIEITLPDGKVVEAQSWRTTPYQVAQGISQGLADNTVISKVNGVLWDLDRPLEDDCSLELLKFDSEEGQQVFWHSSAHILGEAMERIYGGFLCYGPPIDSGFYYDMYLEDQGISSSDFPALDSVVKSIVKEKQPFERLELSKEDLLAMFKYNPFKVRILNEKVKSPTTTVYRCGPLIDLCLGPHVRHTGKVKAFQITKNSSTYWEGNADAETLQRVYGISFPDSKQLKEWQKFQEEAAKRDHRKIGRDQELYFFHELSPGSCFFQPCGAHIYNTLIDFIKSEYRKRGFQEVISPNIYNSKLWETSGHWQHYSENMFSFE…	0	3	2 (2)	3	269609	0	2	1 (1)	1
Tt_053395-T1		peptidyl-alpha-hydroxyglycine alpha-amidating lyase 2	362	41	F:GO:0003824; P:GO:0006518; C:GO:0016020; F:GO:0016829	F:catalytic activity; P:peptide metabolic process; C:membrane; F:lyase activity			MSVYKSHELYFIIIIMASLTVFINVQSHPVYYEPNLNEYSDFYEQLQDLLAIHKNRIANHKTDVNDYPVEVIGWPKNQTIPKGQTAGVDVDSAGRVHVFHRGDVVWDAKSFDWNNVYQHQDQPPISENSVLIFDSKTGDIQSSWGKNRFYMPHGLTIDKNNNTWLTDVALHQVFKFKLGASEPDLVLGQRFVPGNDESHFCKPTDVAVASSGEFYVSDGYCNSRILMFSPSGRLLKEFGKEDEMLVPHSLTLLESLDILCVADRENERILCYSAGLKGSSPGLLIKNFHKNLGRVFAVAARDDHLYMVQGPGIIGKHRVRGLTLSLSTKKILNSWSPVEVVLLIFIHCHWSHAVEIFCSPMY	0	21	5 (5)	11	3.74174e+06	0	20	5 (5)	7	5.19737e+06
Tt_053458-T1		tumor necrosis factor alpha-induced 8 isoform X2	327	37.5	P:GO:0042981	P:regulation of apoptotic process			MVLKGDKGGLYLRVEIPRLLNLIFSSVFTNEEESSIPHLELLFGLDDGKPELTNRSLLVSEHYVSAGIVECNFSSSRPPFSSSEAIFCCTDGRAKLAYVTEQEIHSATLEEVEEIEAFEHTCVRDFVSCRLMVEKLSCYMGDSHFKAKDIGMRTQKKLLSRMANRNIAKVFIDDTSANLLDNLHRIVRYQSGHKKEAEKIIKNVIKIVIKMGILYRNDQFSQEELKIAEKFKHKFHSTAMAIISFYEVDFSYDRNYLLQALNECCAMLKDLISNHLTDKSLNRVDHIFSFFGSPGFLDDVFRRDSPYHETLGRIVSDMHRMMEDGTL	0	5	1 (1)	2	1.81377e+06	0	14	3 (3)	9	1.97873e+07
Tt_053517-T1	PGRP-SD	peptidoglycan-recognition SC2-like	221	24.6	P:GO:0002376; F:GO:0005488	P:immune system process; F:binding			MTYVLLVIFFHVVGIFAAYNESPCKDKVRNGRAGVCMKTVCCDRGNYVSGYCPTQPNNIKCCFGRNTCSSSNQEDCNDVTIVTRSQWRARRPKSRSSLRTPVGKILIHHTAGTTCSSQSSCSSVVRNIQKYHMETKKWSDIGYNFLIGGDGKVYEGRGWKTRGAHSPGHNSKSLGISFMGNFQKVSPSSRMLEAAKTLIKCGVSKVSTFITMYRTNITYLL	0	32	7 (7)	66	3.50288e+07	0	30	5 (5)	27	4.04491e+07
Tt_053563-T1	MTHFS	5-formyltetrahydrofolate cyclo-ligase-like	207	23.7					MNSAASAALRAAKEALRAEVKKKLLSMSKDEKLRQSRLITDRLVNHDRFKNSHRISIYLSTDHEVHTNGILEHIFKMDKQCFIPKYDLNNQHMDMVRLHSLEDLNKLPMTKWNIKQPSDDDHREEALATGGLDLMVIPGLAFDKRGGRIGTGHGYYDVYIDRCLHDPSGRPYLIGLAFQEQILHSIPMDEHDIVADDVLFPDHTGEV	0	35	5 (5)	20	1.08149e+07	0	54	7 (6)	21	2.26695e+07
Tt_053566-T1	RpL17	60S ribosomal L17	185	21.5	F:GO:0003735; P:GO:0006412; C:GO:0015934	F:structural constituent of ribosome; P:translation; C:large ribosomal subunit			MGRYSMEPEIATKSCKARGSNLRVHFKNTHETARALKSMSLRRAQRYLKNVINKKEIVPFRKFTGGPSRKAQVKQWGHNAGRWPKKSAEFLLQLLRNAESNADYKGLDVDHLVIEHIQVNRAPKMRRRTYRAHGRINPYMSSPCHIEVILSEKEDIVAKPAAEEEAPKKKMSKKKMARQKMMQRE	0	39	8 (8)	23	2.67154e+06	0	9	1 (1)	1
Tt_053806-T1		matrix metallo ase-16	197	22.8	F:GO:0016787	F:hydrolase activity			MFISRRMWIFLLLTIFQFSSSQVTQTDKKDLNSNGMEILQSLFPSIDAIFKWSNGVTYIFKGSCYFRYEDKTDEISNCRQLSAWGGLTGPVDAVFRWKNGVTYFFKGECYYRYEDKTDEISKCVAVTAWGGMTGPVDAVFRWSNGVTYFFKNDCYYRYEDKANKISKCTPIAAWGNMTGPVDAVFRWSNGITYFFRS	0	19	3 (3)	4	383244	0	55	8 (8)	31	5.64204e+07
Tt_054034-T1		tyrosine- phosphatase Lar-like isoform X4	193	21.5					EPPRIVTAPRNQTVISGGVASFVCTALGNPKPIIEWRKGNRRLTLPHYTIQEIPDGSVLRIEPEHLKRDKSVYKCLAENGVGEPAYAAVELRVLPKDHIPLGFPQFTVHPRMKAVEKGRTVLLNCQAEGNPTPTITWLKNMIPLNLDDPRLSIIQGTYLQITQAKKEDDGTYECLAENSIGSSFSEQALLYVR	0	25	3 (2)	8	428548	0	23	3 (1)	3	1.44244e+06
Tt_054108-T1		carcinolectin5b-8, partial	309	35.5					MYYTVQVFCTLPLFFLTQADVHHHTTCSTVGSLEGIIDSLSSAVEELTDLAKQKITTIEGPICSKYDVFHFTTPISANETQINEKTSIPEDCASIYQQGNQTSGIYKIWPHFLNHPISTYCDMETVGGGWTLIQRRGDFGDPVENFFQTWNNYKTGFGNVTREFWLGNDIIFALTNQNNMVLRIDLEDMEGGQRYAEYDEFLVRSEMELYKMSYKTYKGDAGDSLSTHNNMMFTTRDRDNDKSEKNCATIYKGGWWYNNCHKSNLNGLFLGGPHAESAVGINWYHWKGHKYSLKKTEMKIRPIEFISRK	0	14	3 (2)	6	1.43377e+06	0	48	14 (7)	554	5.76428e+07
Tt_054241-T1		tyrosine- phosphatase Lar-like isoform X4	200	22.2					EPPRIVTAPRNQTVISGGVASFVCTALGNPKPIIEWRKGNRRLTVPHYTIQEIPDGSVLRIEPEHLKRDKSVYKCLAENGVGEPAYAAVELRVLPKDHIPLGFPLFTVHPRMKAVEKGRTVLLNCQAEGNPTPTITWLKNMIPLNLDDPRLSIIQGTYLQITQAKKEDEGTYECLAENSIGSSFSEQALLYVRGNLWVVC	0	32	5 (3)	14	8.44386e+06	0	31	4 (2)	6	4.39715e+06
Tt_054307-T1		von Willebrand factor type EGF and pentraxin domain-containing 1	334	37					MKYKFTFPLLLLFCVLGLSSCQLDLDKELKTFLGTLETYEQTKNDVVFLLDESGSIGAPNFPHEILFAELIARLLTVSPDTSRVAVVTFSTGHKTHIDYIKNTQGNNMCTLLRDLKSIGYRGGWTHTRDALIQAGDLLKTGRSNSNRVIILISDGQSNNGDPLSIAKDLKEKGNIIFAVGVADVNKDELLAIASSPKHIYMLKDFKYIQKVNEQLRDDIKELSWDVAKDVSLCDSFCTAKSDCCDENANCFCGTRGGRYECACGAGYFGSGHRGECKSGEVRSGCMKMLGENSERREIGQAETHTQKSHTADETKHQHKWQDSWPGKDAVLAAI	0	24	6 (6)	26	1.20735e+07	0	52	15 (15)	94	1.93204e+08
Tt_054413-T1	PGK1	phosphoglycerate kinase 1-like	113	12.3	F:GO:0004618; F:GO:0005524; P:GO:0006096	F:phosphoglycerate kinase activity; F:ATP binding; P:glycolytic process	EC:2.7.2.3	Phosphoglycerate kinase	VKASPEAVATFRGSLTKLGDVYVNDAFGTAHRAHSSMVGVEHSQRAAGFLLKKELTYFAKALESPERPFLAILGGAKVKDKIQLIENMLDKVDEMIIGGGMAFTFLKQLHGME	0.009	13	1 (1)	1	910398	0	13	1 (1)	1	1.84368e+06
Tt_054662-T1		ame: Full=Tachyplesin-2 ame: Full=Tachyplesin II Flags: Precursor	77	9.3	C:GO:0005576; P:GO:0042742	C:extracellular region; P:defense response to bacterium			MKKLVIALCLMMVLAVMVEEAEARWCFRVCYRGICYRKCRGKRNEVRQYRDRGYDVRAIPDETFFTRQDEDEDDDEE	0	32	3 (3)	26	3.98056e+07	0.04	26	1 (1)	3	3.95778e+06
Tt_054801-T1		tachylectin-3	126	14					MLSSTVTDNTLDGTLMKHPSKPAVYQIIDGCRHWVPNPPTYNNLYKTWNCIKTNVLVEHICNCDSLSNGAELIKGSGPAVYLLSNGVKRHIANPDTFNAFCFDWNKIKTYSDIVINNISTGSVIER	0	87	12 (10)	343	7.76708e+08	0	82	9 (9)	154	6.47227e+08
Tt_055269-T1		carcinolectin5b-6	319	36.9					MSIPYIMCYTVQLLCSLSLFFLTQANVHHHTACSTVGSLEGIIDSLSSTVEELTDLAKQRITKLEGPICSEHDVFHFTTPISTNATQIKKRTSLPEDCTSIYHQVNQTNGIYKIWPHFLNHPISVYCDMETLGGGWTVIQRRGDFGNPVEDFYQTWTVYKTGFGNLTREFWLGNDIIFALTNQNNMVLRIDLEDMEGGQRYAEYDEFLVRSEMELYKMSYKTYKGDAGDSLSTHNNMMFTTRDRDNDKWEQNCATTYKGGWWYNKCHHSNLNGLYLGGSHEEFAVGINWYHWKGHKYSLKKSEMKIRPVGFVSREEPQK	0	27	7 (6)	20	1.37573e+07	0	57	16 (9)	658	2.18768e+09
Tt_055360-T1		leukocyte elastase inhibitor-like	407	45.8	F:GO:0004867; C:GO:0005615; P:GO:0010951; F:GO:0016740	F:serine-type endopeptidase inhibitor activity; C:extracellular space; P:negative regulation of endopeptidase activity; F:transferase activity			MADTRKTTLLLIMTFGNIYCRNVHHSELKLAKLSTAVNQFGIDLYKRLSSRGNDQVCFSPFSLSTALTMAYLGAKGETAAEMRNALGFLKAGLEVEEISRSFYEAFEQLQNDQKDYQLNLADMALIQANYRVLEDYKRTLEDNLHADTRSVDFGSNGLGVKDLVNSWVSSKTHNKITSLLSKPLHSLTRLFLLNAVYFKGVWTTQFDPKKTVPLPFFNQNQLSKSVPMMKVTSEFPYNYDSNLRCQVLELPYKGDRISMVIILPEKGYGLKKVESLLTSDSLNRLLNNLLVMKVDVTLPKFKLEDSPKVKQYLQDMGIKRAFSNAADFSGISGHQDLYVSDVLHKAMIEVNEEGSEAAAVTGVVILIKSASVHEDRVQIFNVDHPFLFIIRDKISGMIL…	0	24	9 (8)	23	8.40223e+06	0	49	21 (1)	130	1.7256e+07
Tt_055393-T1		alanine--tRNA cytoplasmic	249	27.6	F:GO:0002161; F:GO:0004813; F:GO:0005524; C:GO:0005739; P:GO:0006400; P:GO:0006419; F:GO:0016597	F:aminoacyl-tRNA editing activity; F:alanine-tRNA ligase activity; F:ATP binding; C:mitochondrion; P:tRNA modification; P:alanyl-tRNA aminoacylation; F:amino acid binding	EC:6.1.1.7; EC:3.1.1.1	Alanine--tRNA ligase; Carboxylesterase	VLVDCEEHVMIGWIITVSDWRRDFLQIQLMVATGYSSVIWNLCFVKALRKAEVFQKSVKDVHDIISDQKRSQNNKDLVKKIVELTEEISQSSISYWKKEELRANLKNMKKQLDDMDRANKTAVTQEVIEQAKQLLEGNSHEKFIVHAFEAGSNAKALDGALKQVKSISPETAAMFFSAGNGKVICLSSVPKGAVSKGLKANEWVQEISGVIDGKGGGKEEAAQATGTRVSSLDEAMKLAKQFAELKLAK	0	20	4 (4)	8	484169	0	6	1 (1)	2	253300
Tt_055441-T1		techylectin-5A-like isoform X1	109	12.8	C:GO:0005576; F:GO:0030246; F:GO:0046872; P:GO:0098609	C:extracellular region; F:carbohydrate binding; F:metal ion binding; P:cell-cell adhesion			WIENEDYLYRLHIGNYSGDAGNSFGRHNGHNFSTIDKDHDTHETHCAQTYKGGWWYDRCHESNLNGLYLNGEHNSYADGIEWRAWKGYHYSLPQVEMKIRPVEFNIIGN	0	76	6 (6)	427	1.71217e+09	0	76	8 (8)	472	5.56465e+09
Tt_055472-T1		plasma carcinolectin	121	13.3	C:GO:0005576; F:GO:0030246; F:GO:0046872; P:GO:0098609	C:extracellular region; F:carbohydrate binding; F:metal ion binding; P:cell-cell adhesion			MHNLRNILFVITLIGQKYGLTSSQNKELCDVTSSTGLLDSIKVMASHVKEQLKDKGTSEVAQPIVSPDPTDCADILLNGYRSSGGYRIWPKSWMTVGTLNVYCDMETDGGGWTVSTTYYQG	0	54	8 (8)	136	2.87661e+08	0	50	5 (5)	81	3.597e+08
Tt_055589-T1		uncharacterized protein C05D11.1-like	71	8	F:GO:0003824; P:GO:0006508; F:GO:0046872	F:catalytic activity; P:proteolysis; F:metal ion binding			FARAKESNEIEPPQEVITSVSLPPTSAIQFHPISRSSNHNEDELDNIPSFSLKDMPCRFQLDDTHTNFVKV	0	70	2 (2)	4	569498	0	25	1 (1)	1	560006
Tt_055596-T1		A disintegrin and metallo ase with thrombospondin motifs adt-1-like	107	12.4	F:GO:0005509	F:calcium ion binding			MGGWGQWEEWSECFGFSENLVRVRTRKCLNVDPDEKIKYCPESDDTQTEACSVEVTPEWREWREWSACTVSCGFGTRVRYRSCIIPGKDCKEEDSSDVEKCFIKPCS	0.003	8	1 (1)	1		0	8	1 (1)	2	1.60366e+06
Tt_055876-T1		ame: Full=Limulus clotting factor C Short=FC Contains: ame: Full=Limulus clotting factor C heavy chain Contains: ame: Full=Limulus clotting factor C light chain Contains: ame: Full=Limulus clotting factor C chain A Contains: ame: Full=Limulus clotting factor C chain B Flags: Precursor	455	50.3	F:GO:0004252; C:GO:0005576; P:GO:0006508; P:GO:0007155; F:GO:0030246; P:GO:0042381	F:serine-type endopeptidase activity; C:extracellular region; P:proteolysis; P:cell adhesion; F:carbohydrate binding; P:hemolymph coagulation	EC:3.4.21	Acting on peptide bonds (peptidases)	MMDLSDRNKAKCDDPGSLENGHATLHGQSIDGFYAGSSIRYSCEVLHYLSGTETVTCTTNGTWSAPKPRCIKVITCQNPPVPSYGSVEIKPPSRTNSISRVGSPFLRLPRLPLPLARAAKPPPKPRSSQPSTVDLASKVKLPEGHYRVGSRAIYTCESRYYELLGSQGRRCESNGNWSGRPASCIPVCGRSDSPRSPFIWHGNSTEIGQWPWQAGISRWLADHNMWFLQCGGSLLNEKWIVTAAHCVTYSATAEIIDPSQFKIYLGKYYRDDSRDDDYVQVREALEVHVNPNYDPGNLNFDIALIQLKTPVTLTTRVQPICLPTDITTREHLKEGTLAVVTGWGLNENNTYSEMIQQAVLPVVAASTCEEGYKEADLPLTVTENMFCAGYKKGRYDACS…	0	26	13 (13)	89	1.02686e+08	0	48	20 (20)	105	2.79208e+08
Tt_055892-T1		limulus factor C precursor	548	60.4	F:GO:0004252; C:GO:0005576; P:GO:0006508; P:GO:0007155; F:GO:0030246; P:GO:0042381	F:serine-type endopeptidase activity; C:extracellular region; P:proteolysis; P:cell adhesion; F:carbohydrate binding; P:hemolymph coagulation	EC:3.4.21	Acting on peptide bonds (peptidases)	MQQMKLETEKNEQRRNMCTERVVGLDGTTRWREKVLPLLSPQYLRVLLCDPDKPEYILSGLVLGLLAQQMRPVQSRGVDLGLCDETRFECKCGDPGYVFNVPMKQCTYFYRWRPYCKPCDDLEAKDICPKYKRCQECKAGLDSCVTCPPNKYGTWCSGECQCKNGGICDQRTGACACRDRYEGAHCEILKGCPLLPSDSQVQEVRNPPDNPQTIDYSCSPGFKLKGVTRISCLPNGQWSSFPPKCIRECAKVSSPEHGKVNAPSGNMIEGATLRFSCDSPYYLIGQETLTCQGNGQWSGQIPQCKKLVFCPDLDPVNHAEHQVKIGVEQKYGQFPQGTEVTYTCSGNYFLMGFNTLKCNPDGSWSGSQPSCVKVADREVDCDSKAVDFLDDVGEPVRIH…	0	31	16 (2)	149	5.05736e+06	0	42	20 (2)	97	3.2153e+07
Tt_055893-T1		ame: Full=Limulus clotting factor C Short=FC Contains: ame: Full=Limulus clotting factor C heavy chain Contains: ame: Full=Limulus clotting factor C light chain Contains: ame: Full=Limulus clotting factor C chain A Contains: ame: Full=Limulus clotting factor C chain B Flags: Precursor	619	68.1	F:GO:0004252; C:GO:0005576; P:GO:0006508; P:GO:0007155; F:GO:0030246; P:GO:0042381	F:serine-type endopeptidase activity; C:extracellular region; P:proteolysis; P:cell adhesion; F:carbohydrate binding; P:hemolymph coagulation	EC:3.4.21	Acting on peptide bonds (peptidases)	MVLASFLVSGLVLGILAQQMRPVQSRGVDLGLCDETRFECKCGDPGYVFNVPMKQCTYFYRWRPYCKPCDDLEAKDICPKYKRCQECKAGLDSCVTCPPNKYGTWCSGECQCKNGGICDQRTGACTCRDRYEGAHCEILKGCPLLPSDSQVQEVRNPPDNPQTIDYSCSPGFKLKGVARISCLPNGQWSSFPPKCIRECAKVSSPEHGKVNAPSGNMIEGATLRFSCDSPYYLIGQETLTCQGNGQWSGQIPQCKKLVFCPDLDPVNHAEHQVKIGVEQKYGQFPQGTEVTYTCSGNYFLMGFNTLKCNPDGSWSGSQPSCVKVADREVDCDSKAVDFLDDVGEPVRIHCPAGCSLTAGTVWGTAIYHELSSVCRAAIHAGKLPNSGGAVHVVNNGPYS…	0	33	20 (6)	162	8.77054e+07	0	43	24 (12)	147	2.88085e+08
Tt_055952-T1		60S ribosomal L13-like	214	25.1	F:GO:0003735; C:GO:0005840; P:GO:0006412	F:structural constituent of ribosome; C:ribosome; P:translation			MAPKRNNMVPNGHFHKYWQRYVKTWFNQPMRKKRRHDRRVKKAHKIAPRPVGGPLRPIVRCPTIRYNNKIRLGRGFTLEELKAAGIHKREAQTIGIAIDYRRQNKSVESLQQNVQRIKEYRSKLILFPKNMSKPRKGDSSAEEMKMATQLSGIVMPVSQLVRREKARVVTEEDKKFQAFVTLRQARSHARLWGMRQKKAKEAAEELMASAPKKK	0	26	6 (6)	13	3.62297e+06	0	9	2 (2)	3	453472
Tt_055964-T2		adenosylhomocysteinase-like	433	47.8	F:GO:0004013; C:GO:0005737; P:GO:0006730	F:adenosylhomocysteinase activity; C:cytoplasm; P:one-carbon metabolic process	EC:3.3.1.1	Adenosylhomocysteinase	MSQKPAHKVADITLADFGRKEMIMAENEMPGLMALRKKYGLLKPLKGARIAGCLHMTIQTAVLIETLLELGAEVQWSSCNIFSTQDHAAAAIAKRGVAVYAWKGETDEEYIWCIEQTLVFPDGQPLNMILDDGGDLTNLVHTKYPQYLPGIVGVSEETTTGVHNLYKMLKNDTLKIPAINVNDSVTKSKFDNLYGCRESLTDGIKRATDIMLAGKVCVVAGYGDVGKGSAQSLRAFGARIIITEIDPINALQAAMEGYEVTTMEDAVSRASIFVTTTGCRDIITGEHFMKMGNDSIVCNIGHFDIEIDVKWLEQNAVEKVNIKPQVDRYKLANGNHIILLAEGRLVNLGCATGHPSFVMSNSFTNQVLAQIELWTKKGQYKVGVYFLPKKLDEEVATLH…	0	8	3 (3)	10	2.50133e+06	0	44	14 (14)	28	5.76681e+07
Tt_056432-T1		tubulin beta chain-like	485	54.7	F:GO:0003924; F:GO:0005200; F:GO:0005525; C:GO:0005737; C:GO:0005874; P:GO:0007010; P:GO:0007017	F:GTPase activity; F:structural constituent of cytoskeleton; F:GTP binding; C:cytoplasm; C:microtubule; P:cytoskeleton organization; P:microtubule-based process	EC:3.6.1.15	Nucleoside-triphosphate phosphatase	MRSRSLVDILNQKYCTYSPYSFLKRRGGRVQEHIIVKRANMREIVHVQAGQCGNQIGAKFWEVISDEHGIDPTGTYHGDSDLQLERINVYYNEASGGKYVPRAILLDLEPGTMDSVRSGPFGQLFRPDNFVFGQSGAGNNWAKGHYTEGAELVDTVLDVVRKESESCDCLQGFQLAHSLGGGTGSGMGTLLISKVREEYPDRIMNTFSVLPSPKVSDTVVEPYNATLSVHQLVENTDETYCIDNEALYDICFRTLKLTTPTYGDLNHLVSVTMSGVTTCLRFPGQLNADLRKLAVNMVPFPRLHFFMPGFAPLTSRGSQQYRALSVPELTQQMFDAKNMMAACDPRHGRYLTVATIFRGRMSMKEVDEQMLNVQNKNSSYFVEWIPNNVKTAVCDIPPR…	0	26	9 (1)	18	2.54002e+06	0	43	16 (2)	25	5.69582e+07
[truncated: 791 more rows]
